# Supplementary material for: β-catenin activates TGF-β-induced epithelial–mesenchymal transition in adenomyosis
Source: PubMed Central journal article supplement (PMC8080580; doi:10.1038/s12276-020-00514-6), 2020-10-15
Supplement: 12276_2020_514_MOESM1_ESM.pdf [file 12276_2020_514_MOESM1_ESM.pdf]

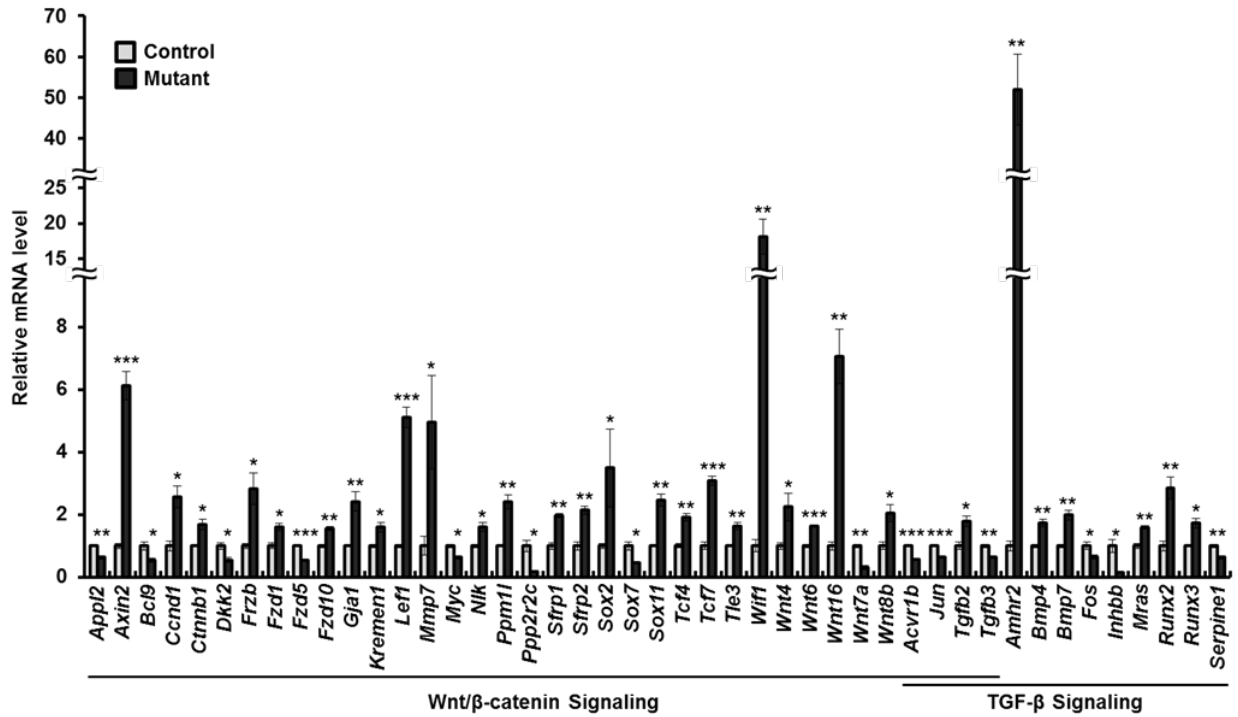

**Supplementary Figure S1. Identification of β-catenin-regulated genes for adenomyosis**

**development.** Quantitative real-time PCR analysis of genes related to Wnt/β-catenin and TGF-β

signaling in uteri of control and mutant mice at 4 weeks of age. The results represent the mean ±

13 SEM. \* p<0.05, \*\* p<0.01 and \*\*\* p<0.001.

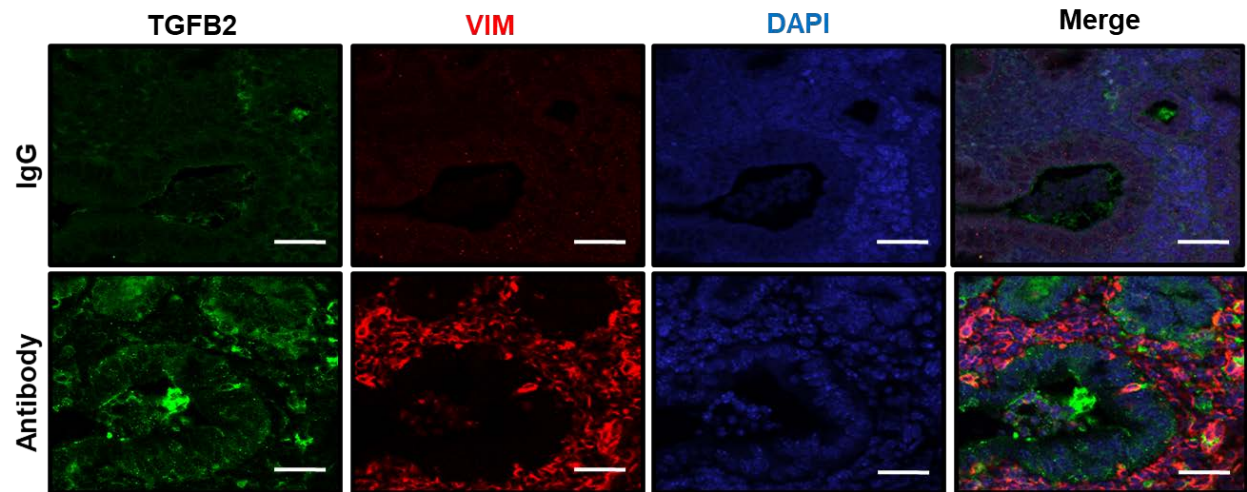

**Supplementary Figure S2. Immunofluorescence analysis <sup>24</sup> of IgG antibody intended for use as a negative control with TGF- $\beta$ 2 or vimentin in the uterus of mutant mice at 4 weeks of age. Nuclei were counterstained with DAPI. Scale bars represent 50  $\mu$ m.**

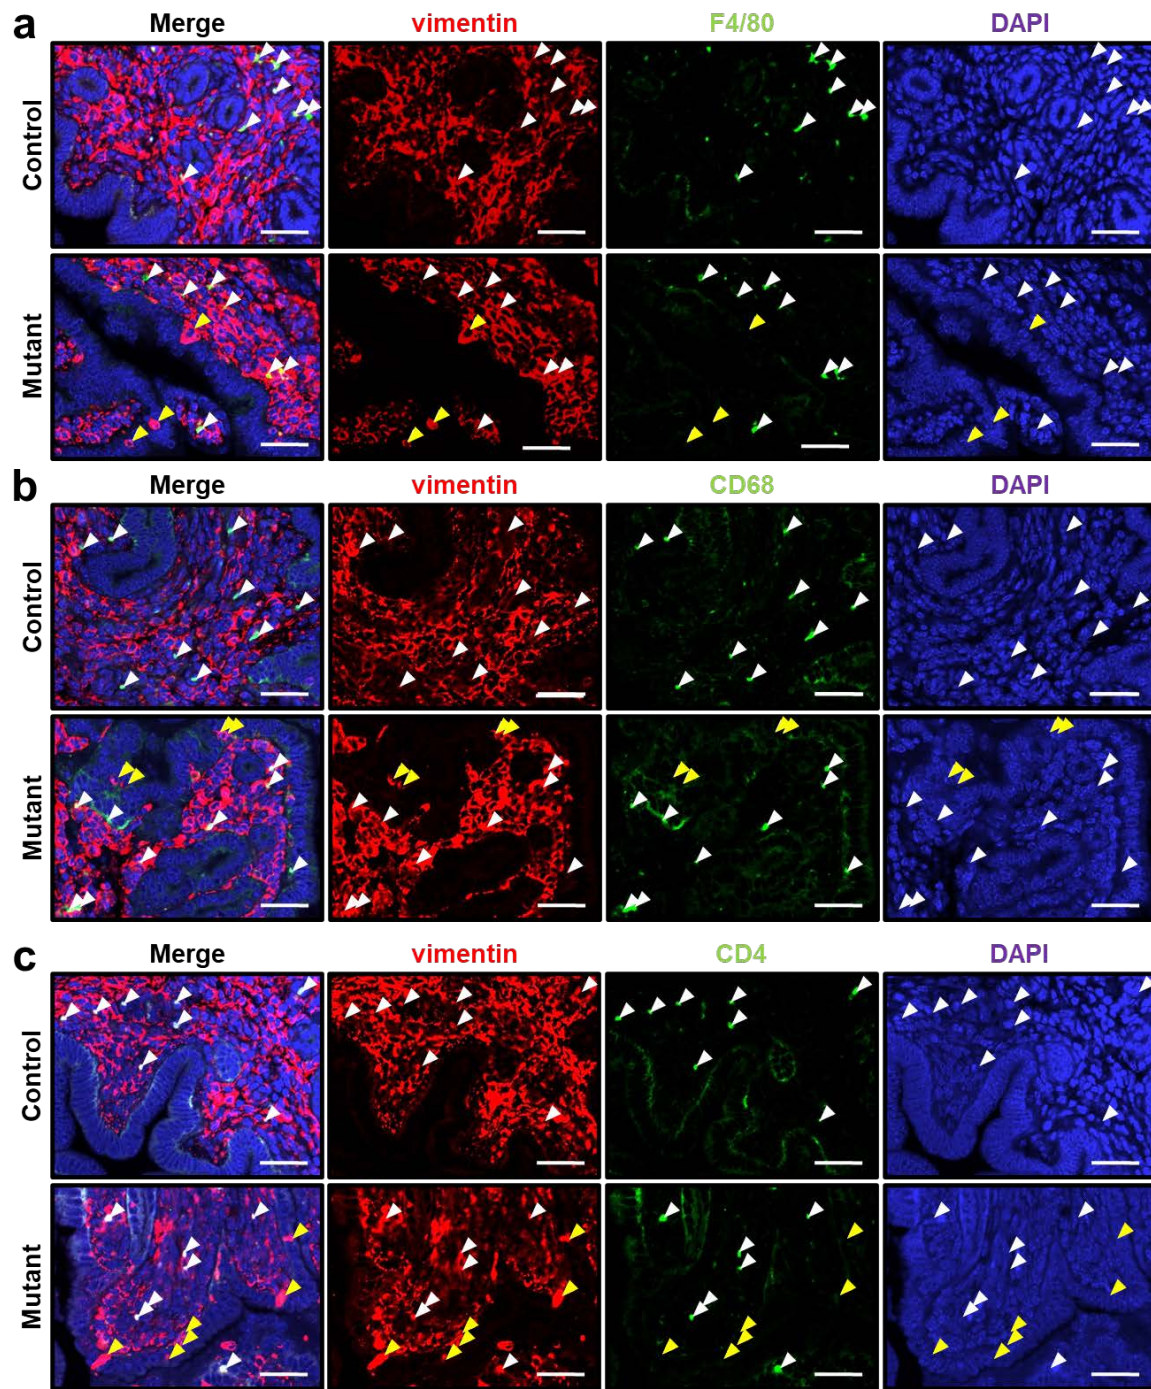

**Supplementary Figure S3.** Correlation of vimentin expression with F4/80, CD68, or CD4 in mutant mouse uterus. The immunofluorescence analysis of vimentin and F4/80 (a), CD68 (b), or CD4 (c) in the uterus of control and mutant mice at 4 weeks of age. Nuclei were counterstained with DAPI staining. Scale bars represent 50  $\mu\text{m}$ .



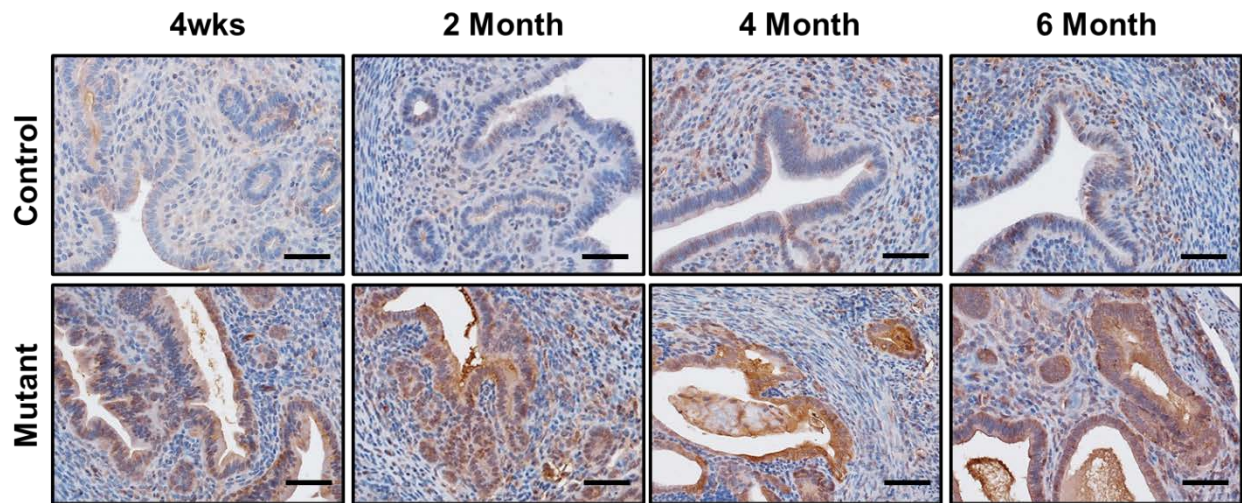

**Supplementary Figure S4. Overexpression of TGF- $\beta$ 2 in the murine uterus at 1, 2, 4, and 6 months of age.** Immunohistochemical staining of TGF- $\beta$ 2 in uteri of control and mutant mice at 1, 2, 4, and 6 months of age. Scale bars represent 50  $\mu$ m.

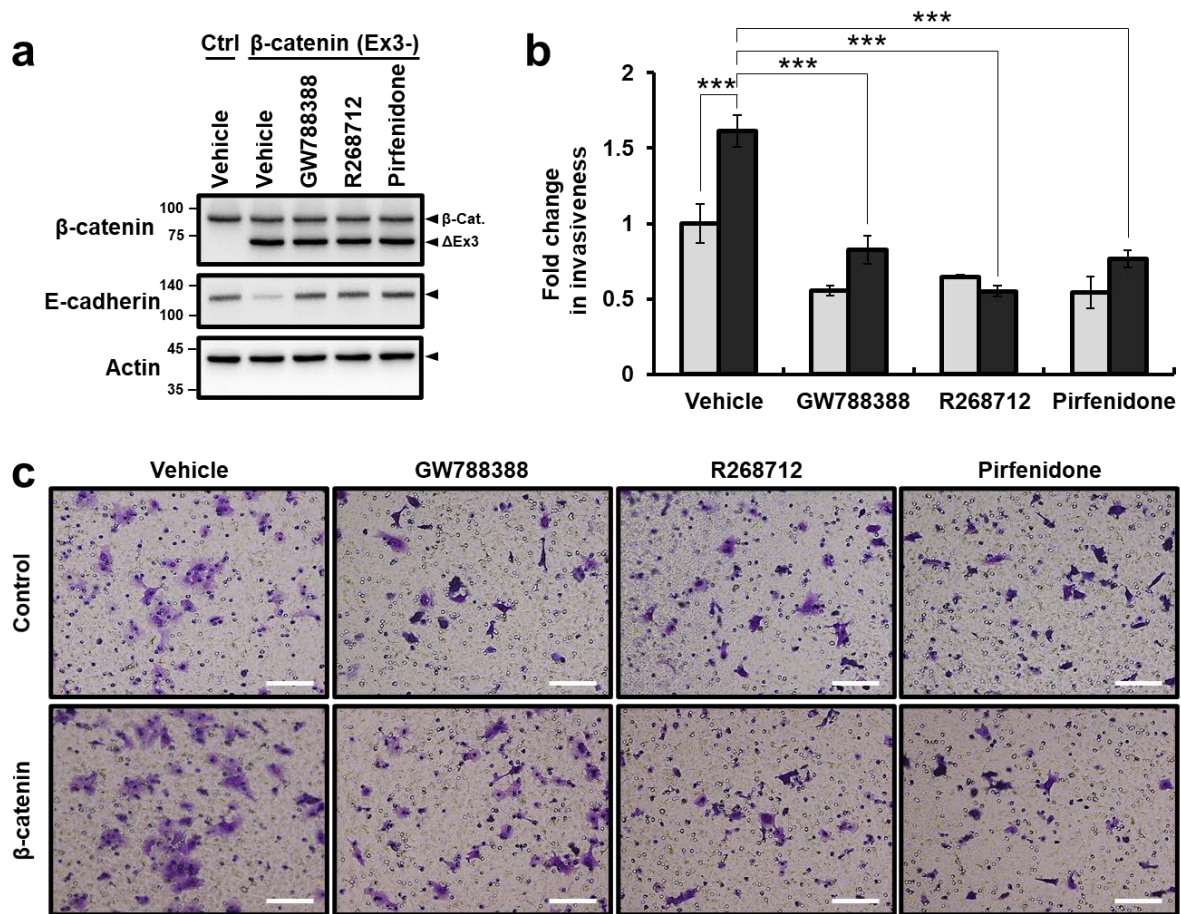

**Supplementary Figure S5. Decrease of invasiveness of Ishikawa cells following  $\beta$ -catenin activation by TGF- $\beta$  inhibitors.** (a) The expression of  $\beta$ -catenin and E-cadherin was measured in Ishikawa cells transfected with exon3-deleted  $\beta$ -catenin vector transfected Ishikawa cells treated with vehicle, GW788388, R268712, and pirfenidone over 48 hours using Western blot analysis. (b) Quantification of invasion through the matrigel and transwell membrane control or exon3-deleted  $\beta$ -catenin vector transfected Ishikawa cells treated with vehicle, GW788388, R268712, and pirfenidone over 48 hours. (c) Representative result of transwell invasion assays of control or exon3-deleted  $\beta$ -catenin vector transfected Ishikawa cells treated with vehicle, GW788388, R268712, and pirfenidone over 48 hours. The results represent the mean  $\pm$  SEM. \*\*\*  $p < 0.001$ . Scale bars represent 100  $\mu$ m.

**Table S1.  $\beta$ -catenin target genes in the mutant mice**

| Accession No.                                                  | Symbol        | Gene Title                                                                                                       | Chr | Gene Start | Gene End   | Interval Dists to Start | Interval Pos        | Avg Peak |
|----------------------------------------------------------------|---------------|------------------------------------------------------------------------------------------------------------------|-----|------------|------------|-------------------------|---------------------|----------|
| NM_025300                                                      | Mprl15        | mitochondrial ribosomal protein L15                                                                              | 1   | 4,763,290  | 4,775,791  | 11311                   | in gene             | 13.00    |
| NM_177834                                                      | Cpa6          | carboxypeptidase A6                                                                                              | 1   | 10,314,808 | 10,710,024 | 8808                    | in gene             | 6.00     |
| NM_172294                                                      | Sulf1         | sulfatase 1                                                                                                      | 1   | 12,708,626 | 12,850,453 | 96078                   | in gene             | 5.00     |
| NM_028173                                                      | Tram1         | translocating chain-associating membrane protein 1                                                               | 1   | 13,554,783 | 13,579,945 | -3431                   | upstream            | 6.00     |
| NM_026456                                                      | Tceb1         | transcription elongation factor B (SIII), polypeptide 1                                                          | 1   | 16,631,917 | 16,646,946 | -8446                   | upstream            | 7.00     |
| NM_026392, NM_027415                                           | Tmem70        | transmembrane protein 70                                                                                         | 1   | 16,655,272 | 16,668,356 | 120                     | in gene             | 7.00     |
| NM_029398                                                      | Tmem14a       | transmembrane protein 14A                                                                                        | 1   | 21,208,712 | 21,220,248 | -88                     | upstream            | 4.00     |
| NM_001012623, NM_001012624, NM_001012625, NM_053270, NM_183018 | Rims1         | regulating synaptic membrane exocytosis 1                                                                        | 1   | 22,278,503 | 22,422,924 | 147180                  | downstream          | 5.00     |
| NM_026719                                                      | Lmbrd1        | LMBR1 domain containing 1                                                                                        | 1   | 24,685,383 | 24,823,146 | -39, 55625              | upstream, in gene   | 6.50     |
| NM_011200                                                      | Ptp4a1        | protein tyrosine phosphatase 4a1                                                                                 | 1   | 30,997,148 | 31,006,600 | -568                    | upstream            | 8.00     |
| NM_008922                                                      | Prim2         | DNA primase, p58 subunit                                                                                         | 1   | 33,510,656 | 33,726,603 | -549                    | upstream            | 7.00     |
| XR_035294, XR_035301                                           | 1700001G17Rik | RIKEN cDNA 1700001G17 gene                                                                                       | 1   | 33,726,669 | 33,727,559 | 483                     | in gene             | 7.00     |
| NM_011206                                                      | Ptpn18        | protein tyrosine phosphatase, non-receptor type 18                                                               | 1   | 34,516,591 | 34,530,629 | -239                    | upstream            | 8.00     |
| XM_982794                                                      | EG666290      | predicted gene, EG666290                                                                                         | 1   | 36,059,830 | 36,067,883 | 11563                   | downstream          | 7.00     |
| NM_153408                                                      | LincR         | lung-inducible neuralized-related C3HC4 RING domain protein                                                      | 1   | 36,321,447 | 36,330,270 | 2526                    | in gene             | 6.00     |
| NM_026241                                                      | Ankrd39       | ankyrin repeat domain 39                                                                                         | 1   | 36,595,018 | 36,604,046 | -130, -9362             | upstream, upstream  | 5.00     |
| XM_898566, XM_985534                                           | Sema4c        | sema domain, immunoglobulin domain (Ig), transmembrane domain (TM) and short cytoplasmic domain, (semaphorin) 4C | 1   | 36,605,485 | 36,616,889 | 12713, 3481             | downstream, in gene | 5.00     |
| NM_146107                                                      | Actr1b        | ARP1 actin-related protein 1 homolog B (yeast)                                                                   | 1   | 36,756,047 | 36,766,770 | -110                    | upstream            | 6.00     |
| XM_129743                                                      | 4933424G06Rik | RIKEN cDNA 4933424G06 gene                                                                                       | 1   | 36,771,383 | 36,814,805 | -4503                   | upstream            | 6.00     |
| NM_018872                                                      | Tmem131       | transmembrane protein 131                                                                                        | 1   | 36,849,034 | 36,996,372 | 115284                  | in gene             | 6.00     |
| NM_019570                                                      | Rev1          | REV1 homolog (S. cerevisiae)                                                                                     | 1   | 38,109,631 | 38,186,507 | -677                    | upstream            | 5.00     |
| NM_008719                                                      | Npas2         | neuronal PAS domain protein 2                                                                                    | 1   | 39,251,044 | 39,419,031 | 125660, 174225          | in gene, downstream | 5.00     |
| XM_001477395                                                   | LOC100041999  | similar to Ribosomal protein L17                                                                                 | 1   | 39,371,721 | 39,372,339 | 4983                    | downstream          | 5.00     |
| NM_053257                                                      | Rpl31         | ribosomal protein L31                                                                                            | 1   | 39,424,764 | 39,428,752 | 505                     | in gene             | 5.00     |
| NM_010553                                                      | Il18rap       | interleukin 18 receptor accessory protein                                                                        | 1   | 40,572,208 | 40,606,150 | 20165                   | in gene             | 5.00     |
| NM_001013025                                                   | Tgfbp1        | transforming growth factor, beta receptor associated protein 1                                                   | 1   | 43,104,114 | 43,155,467 | 10603                   | in gene             | 6.00     |
| NM_010212                                                      | Fhl2          | four and a half LIM domains 2                                                                                    | 1   | 43,179,919 | 43,220,806 | -6010                   | upstream            | 6.00     |
| NM_010879                                                      | Nck2          | non-catalytic region of tyrosine kinase adaptor protein 2                                                        | 1   | 43,502,596 | 43,627,359 | 56316                   | in gene             | 6.00     |
| NM_010863                                                      | Myo1b         | myosin IB                                                                                                        | 1   | 51,806,609 | 51,972,796 | 24668                   | in gene             | 5.00     |
| NM_001081433                                                   | Ankrd44       | ankyrin repeat domain 44                                                                                         | 1   | 54,702,184 | 54,983,202 | 171618                  | in gene             | 7.00     |
| NM_030211                                                      | Kctd18        | potassium channel tetramerisation domain containing 18                                                           | 1   | 58,016,898 | 58,026,896 | 272                     | in gene             | 7.00     |
| NM_009805, NM_207653                                           | Cflar         | CASP8 and FADD-like apoptosis regulator                                                                          | 1   | 58,770,130 | 58,815,728 | 33838                   | in gene             | 8.00     |
| NM_018868                                                      | Nol5          | nucleolar protein 5                                                                                              | 1   | 59,741,850 | 59,768,354 | 6                       | in gene             | 6.00     |
| XM_001481295, XM_990954                                        | Nbeal1        | neurobeachin like 1                                                                                              | 1   | 60,237,443 | 60,391,923 | 19901, 162909           | in gene, downstream | 8.00     |
| NM_030013                                                      | Cyp20a1       | cytochrome P450, family 20, subfamily A, polypeptide 1                                                           | 1   | 60,400,216 | 60,444,231 | 136                     | in gene             | 10.00    |
| NM_198127                                                      | Abi2          | abl-interactor 2                                                                                                 | 1   | 60,466,642 | 60,538,002 | -253                    | upstream            | 7.00     |
| NM_001081050                                                   | Pard3b        | par-3 partitioning defective 3 homolog B (C. elegans)                                                            | 1   | 61,685,817 | 62,684,497 | 952743                  | in gene             | 5.00     |
| NM_007381                                                      | Acadl         | acyl-Coenzyme A dehydrogenase, long-chain                                                                        | 1   | 66,877,427 | 66,909,841 | -79                     | upstream            | 9.00     |
| XM_001002143, XM_136682, XM_909965, XM_986918                  | ErbB4         | v-erb-a erythroblastic leukemia viral oncogene homolog 4 (avian)                                                 | 1   | 68,086,540 | 69,154,633 | 1065401                 | in gene             | 5.00     |
| XM_619639, XM_984786                                           | Tns1          | tensin 1                                                                                                         | 1   | 73,956,805 | 74,171,021 | 151677, 29741           | in gene, in gene    | 6.00     |
| NM_001039509, NM_019999, NM_025580                             | Pnkd          | paroxysmal nonkinesinogenic dyskinesia                                                                           | 1   | 74,331,608 | 74,400,266 | 18744                   | in gene             | 6.00     |
| NM_027154                                                      | Tmbim1        | transmembrane BAX inhibitor motif containing 1                                                                   | 1   | 74,334,828 | 74,350,734 | 382                     | in gene             | 6.00     |
| XM_001477569, XM_001480060                                     | 2410125D13Rik | RIKEN cDNA 2410125D13 gene                                                                                       | 1   | 74,350,254 | 74,351,143 | 98                      | in gene             | 6.00     |
| NM_013612                                                      | Slc11a1       | solute carrier family 11 (proton-coupled divalent metal ion transporters), member 1                              | 1   | 74,421,803 | 74,432,636 | 5701                    | in gene             | 6.00     |
| NM_153744, NM_153745                                           | Prkag3        | protein kinase, AMP-activated, gamma 3 non-catalytic subunit                                                     | 1   | 74,787,214 | 74,795,436 | 332                     | in gene             | 5.00     |
| NM_194333                                                      | Slc23a3       | solute carrier family 23 (nucleobase transporters), member 3                                                     | 1   | 75,122,115 | 75,130,464 | 8672                    | downstream          | 7.00     |
| NM_026977                                                      | 1810031K17Rik | RIKEN cDNA 1810031K17 gene                                                                                       | 1   | 75,131,789 | 75,138,942 | 17150                   | downstream          | 7.00     |

| Accession No.                               | Symbol        | Gene Title                                                                      | Chr | Gene Start  | Gene End    | Interval Dists to Start | Interval Pos                       | Avg Peak |
|---------------------------------------------|---------------|---------------------------------------------------------------------------------|-----|-------------|-------------|-------------------------|------------------------------------|----------|
| NM_010043                                   | Des           | desmin                                                                          | 1   | 75,356,919  | 75,364,291  | -151                    | upstream                           | 6.00     |
| NM_007936                                   | Epha4         | Eph receptor A4                                                                 | 1   | 77,363,760  | 77,511,663  | 639                     | in gene                            | 5.00     |
| XM_001472811                                | LOC100039330  | hypothetical protein LOC100039330                                               | 1   | 77,511,855  | 77,513,703  | -831                    | upstream                           | 5.00     |
| NM_172849                                   | 9430031J16Rik | RIKEN cDNA 9430031J16 gene                                                      | 1   | 81,073,892  | 81,268,239  | 138108                  | in gene                            | 7.00     |
| NM_022417                                   | Itm2c         | integral membrane protein 2C                                                    | 1   | 87,791,140  | 87,805,267  | 4812                    | in gene                            | 7.00     |
| NM_027456,<br>NM_030184                     | Armc9         | armadillo repeat containing 9                                                   | 1   | 88,051,355  | 88,174,859  | 87989                   | in gene                            | 7.00     |
| XM_001474704                                | LOC100040414  | similar to ribosomal protein L30                                                | 1   | 88,370,234  | 88,370,581  | -1098                   | upstream                           | 6.00     |
| NM_008801                                   | Pde6d         | phosphodiesterase 6D, cGMP-specific, rod, delta                                 | 1   | 88,439,590  | 88,479,076  | -4604                   | upstream                           | 5.00     |
| NM_172974                                   | Cops7b        | COP9 (constitutive photomorphogenic) homolog, subunit 7b (Arabidopsis thaliana) | 1   | 88,483,675  | 88,503,075  | 5                       | in gene                            | 5.00     |
| NM_153530                                   | 4930429A22Rik | RIKEN cDNA 4930429A22 gene                                                      | 1   | 88,600,418  | 88,946,667  | 147                     | in gene                            | 5.00     |
| NM_001039169,<br>NM_001039170,<br>NM_023314 | Eif4e2        | eukaryotic translation initiation factor 4E member 2                            | 1   | 89,110,489  | 89,137,063  | 32199                   | downstream                         | 5.00     |
| NM_146112                                   | Tnrc15        | trinucleotide repeat containing 15                                              | 1   | 89,223,628  | 89,345,721  | 5636                    | in gene                            | 7.00     |
| XM_001475127                                | LOC100040600  | similar to Tnrc15 protein                                                       | 1   | 89,223,643  | 89,224,297  | 5621                    | downstream                         | 7.00     |
| NM_029846                                   | Atg16l1       | autophagy-related 16-like 1 (yeast)                                             | 1   | 89,652,646  | 89,688,997  | 40858                   | downstream                         | 7.00     |
| NM_009118                                   | Sag           | retinal S-antigen                                                               | 1   | 89,700,255  | 89,741,732  | -6751, 49857            | upstream,<br>downstream            | 6.50     |
| NM_001033291                                | Usp40         | ubiquitin specific peptidase 40                                                 | 1   | 89,841,696  | 89,905,126  | 66102                   | downstream                         | 7.00     |
| XM_001475729                                | LOC100040766  | similar to hCG2012694                                                           | 1   | 90,123,595  | 90,158,864  | 13317, 17077, 38112     | in gene, in gene,<br>downstream    | 8.67     |
| NM_198652                                   | 6430706D22Rik | RIKEN cDNA 6430706D22 gene                                                      | 1   | 90,159,684  | 90,174,095  | 12388                   | in gene                            | 7.00     |
| XM_001471840                                | LOC100038822  | hypothetical protein LOC100038822                                               | 1   | 90,161,403  | 90,174,132  | 12425                   | in gene                            | 7.00     |
| XM_001473750,<br>XM_001474136               | 2410088K16Rik | RIKEN cDNA 2410088K16 gene                                                      | 1   | 90,651,471  | 90,652,310  | -3519                   | upstream                           | 5.00     |
| NM_008515                                   | Lrrfp1        | leucine rich repeat (in FLII) interacting protein 1                             | 1   | 92,950,084  | 93,025,495  | -10148                  | upstream                           | 6.00     |
| NM_001033292                                | Espnl         | espin-like                                                                      | 1   | 93,218,652  | 93,244,880  | 24932                   | in gene                            | 5.00     |
| NM_027551                                   | Klh30         | kelch-like 30 (Drosophila)                                                      | 1   | 93,247,650  | 93,258,981  | -4066                   | upstream                           | 5.00     |
| NM_011066                                   | Per2          | period homolog 2 (Drosophila)                                                   | 1   | 93,312,559  | 93,355,873  | -1183                   | upstream                           | 6.00     |
| NM_024197                                   | Ndufa10       | NADH dehydrogenase (ubiquinone) 1 alpha subcomplex 10                           | 1   | 94,336,285  | 94,370,335  | -81                     | upstream                           | 6.00     |
| NM_147038                                   | Olf1416       | olfactory receptor 1416                                                         | 1   | 94,376,258  | 94,377,196  | 6780                    | downstream                         | 6.00     |
| NM_011796                                   | Capn10        | calpain 10                                                                      | 1   | 94,830,985  | 94,844,525  | 11554                   | in gene                            | 6.00     |
| NM_172411                                   | 2310007B03Rik | RIKEN cDNA 2310007B03 gene                                                      | 1   | 95,047,933  | 95,057,525  | 1253                    | in gene                            | 4.00     |
| XM_001474855,<br>XM_977156                  | E030010N08Rik | RIKEN cDNA E030010N08 gene                                                      | 1   | 95,065,302  | 95,127,651  | -9030                   | upstream                           | 4.00     |
| NM_021537                                   | Stk25         | serine/threonine kinase 25 (yeast)                                              | 1   | 95,517,328  | 95,532,304  | -160                    | upstream                           | 8.00     |
| NM_016778                                   | Bok           | Bcl-2-related ovarian killer protein                                            | 1   | 95,582,271  | 95,592,339  | 1217, 11889, 19233      | in gene, downstream,<br>downstream | 6.67     |
| NM_025920                                   | Thap4         | THAP domain containing 4                                                        | 1   | 95,601,968  | 95,651,415  | 57255, 49911            | downstream,<br>downstream          | 7.00     |
| NM_023136                                   | Dtymk         | deoxythymidylate kinase                                                         | 1   | 95,697,072  | 95,698,452  | -2049                   | upstream                           | 6.00     |
| NM_013626                                   | Pam           | peptidylglycine alpha-amidating monoxygenase                                    | 1   | 99,717,671  | 99,873,836  | 61228                   | in gene                            | 5.00     |
| NM_009257                                   | Serpib5       | serine (or cysteine) peptidase inhibitor, clade B, member 5                     | 1   | 108,757,757 | 108,779,925 | 22723                   | downstream                         | 6.00     |
| NM_001081276                                | Clasp1        | CLIP associating protein 1                                                      | 1   | 120,285,635 | 120,506,039 | 66093, 70461            | in gene, in gene                   | 6.00     |
| NM_001081125                                | Glil2         | GLI-Kruppel family member GLI2                                                  | 1   | 120,730,638 | 120,950,196 | 98772, 4                | in gene, in gene                   | 6.00     |
| NM_022327                                   | Ralb          | v-ral simian leukemia viral oncogene homolog B (ras related)                    | 1   | 121,366,886 | 121,401,205 | 40309                   | downstream                         | 6.00     |
| NM_133186                                   | Steap3        | STEAP family member 3                                                           | 1   | 122,123,783 | 122,161,834 | 33226, 16778            | in gene, in gene                   | 7.00     |
| XM_895892,<br>XM_922706                     | A1848258      | expressed sequence A1848258                                                     | 1   | 122,980,884 | 123,017,009 | 12892                   | in gene                            | 4.00     |
| NM_145128                                   | Mgat5         | mannoside acetylglucosaminyltransferase 5                                       | 1   | 129,101,563 | 129,379,549 | 22960                   | in gene                            | 6.00     |
| NM_181750                                   | R3hdm1        | R3H domain 1 (binds single-stranded nucleic acids)                              | 1   | 129,999,883 | 130,134,312 | 141109                  | downstream                         | 7.00     |
| NM_026390                                   | Ubx2          | UBX domain containing 2                                                         | 1   | 130,140,758 | 130,175,954 | 234                     | in gene                            | 7.00     |
| NM_010016                                   | Cd55          | CD55 antigen                                                                    | 1   | 132,335,606 | 132,359,317 | 28341                   | downstream                         | 5.00     |
| NM_008551                                   | Mapkapk2      | MAP kinase-activated protein kinase 2                                           | 1   | 132,950,281 | 132,994,120 | 45224, 42920            | downstream, in gene                | 5.50     |
| NM_011924                                   | Avpr1b        | arginine vasopressin receptor 1B                                                | 1   | 133,495,691 | 133,508,577 | 4021                    | in gene                            | 5.00     |
| NM_145509                                   | 5430435G22Rik | RIKEN cDNA 5430435G22 gene                                                      | 1   | 133,585,272 | 133,610,041 | 2616, 6568              | in gene, in gene                   | 6.00     |
| NM_173865                                   | Slc41a1       | solute carrier family 41, member 1                                              | 1   | 133,724,554 | 133,745,440 | 14486, 19286            | in gene, in gene                   | 6.50     |
| NM_145977                                   | Slc45a3       | solute carrier family 45, member 3                                              | 1   | 133,867,186 | 133,879,541 | 22254                   | downstream                         | 5.00     |
| NM_172516                                   | Ripk5         | receptor interacting protein kinase 5                                           | 1   | 134,314,030 | 134,363,536 | 14594                   | in gene                            | 6.00     |
| NM_182716                                   | Nfasc         | neurofascin                                                                     | 1   | 134,466,563 | 134,638,342 | 38102                   | in gene                            | 4.00     |
| NM_008575                                   | Mdm4          | transformed mouse 3T3 cell double minute 4                                      | 1   | 134,886,422 | 134,921,925 | 101                     | in gene                            | 5.00     |
| XM_001479658,<br>XM_914845                  | Pik3c2b       | phosphoinositide-3-kinase, class 2, beta polypeptide                            | 1   | 134,962,877 | 135,004,025 | 35395                   | in gene                            | 6.00     |
| NM_133819                                   | Ppp1r15b      | protein phosphatase 1, regulatory (inhibitor) subunit 15b                       | 1   | 135,028,040 | 135,033,805 | 14680                   | downstream                         | 6.00     |
| NM_011439                                   | Sox13         | SRY-box containing gene 13                                                      | 1   | 135,278,877 | 135,320,789 | 1482                    | in gene                            | 4.00     |
| XM_001479170,<br>XM_990438                  | EG667414      | predicted gene, EG667414                                                        | 1   | 136,005,911 | 136,019,726 | -4055                   | upstream                           | 5.00     |
| NM_009307                                   | Syt2          | synaptotagmin II                                                                | 1   | 136,543,258 | 136,645,994 | 40102, 69670            | in gene, in gene                   | 7.00     |
| NM_001081307                                | Ppp1r12b      | protein phosphatase 1, regulatory (inhibitor) subunit 12B                       | 1   | 136,662,520 | 136,852,517 | 182469, 177957          | in gene, in gene                   | 7.50     |

| Accession No.                 | Symbol        | Gene Title                                                                 | Chr | Gene Start  | Gene End    | Interval Dists to Start | Interval Pos                 | Avg Peak |
|-------------------------------|---------------|----------------------------------------------------------------------------|-----|-------------|-------------|-------------------------|------------------------------|----------|
| NM_173437                     | Nav1          | neuron navigator 1                                                         | 1   | 137,335,450 | 137,482,286 | 135726, 3182            | in gene, in gene             | 6.00     |
| NM_175447                     | EG215714      | predicted gene, EG215714                                                   | 1   | 137,481,350 | 137,496,527 | -2246                   | upstream                     | 6.00     |
| NM_007791                     | Csrp1         | cysteine and glycine-rich protein 1                                        | 1   | 137,625,774 | 137,648,806 | 10418                   | in gene                      | 13.00    |
| XM_001478282                  | LOC100042477  | similar to general transcription factor II I repeat domain-containing 1    | 1   | 137,766,004 | 137,766,906 | -7316                   | upstream                     | 5.00     |
| NM_019645                     | Pkp1          | plakophilin 1                                                              | 1   | 137,767,972 | 137,815,601 | 56913                   | downstream                   | 5.00     |
| XM_001478252,<br>XM_001478294 | 9830123M21Rik | RIKEN cDNA 9830123M21 gene                                                 | 1   | 137,850,155 | 137,881,876 | -9964                   | upstream                     | 6.00     |
| NM_172643                     | Zbtb41        | zinc finger and BTB domain containing 41 homolog                           | 1   | 141,318,960 | 141,345,877 | -144                    | upstream                     | 8.00     |
| NM_009061                     | Rgs2          | regulator of G-protein signaling 2                                         | 1   | 145,847,127 | 145,851,279 | -145                    | upstream                     | 7.00     |
| NM_001077237,<br>NM_145511    | BC003331      | cDNA sequence BC003331                                                     | 1   | 152,208,441 | 152,240,185 | -23                     | upstream                     | 7.00     |
| NM_133780                     | Tpr           | translocated promoter region                                               | 1   | 152,239,983 | 152,297,059 | 225                     | in gene                      | 7.00     |
| NM_026876                     | 1190005F20Rik | RIKEN cDNA 1190005F20 gene                                                 | 1   | 153,275,778 | 153,305,289 | 29134                   | in gene                      | 5.00     |
| NM_197990                     | 1700025G04Rik | RIKEN cDNA 1700025G04 gene                                                 | 1   | 153,739,715 | 153,937,229 | 173709                  | in gene                      | 6.00     |
| NM_010683                     | Lamc1         | laminin, gamma 1                                                           | 1   | 155,066,052 | 155,179,916 | 69996                   | in gene                      | 4.00     |
| NM_009230                     | Soat1         | sterol O-acyltransferase 1                                                 | 1   | 158,358,239 | 158,404,459 | -117                    | upstream                     | 5.00     |
| NM_009595                     | Abl2          | v-abl Abelson murine leukemia viral oncogene 2 (arg, Abelson-related gene) | 1   | 158,489,180 | 158,579,750 | 10356                   | in gene                      | 4.00     |
| XM_001472239,<br>XM_917090    | LOC433368     | similar to HCV NS5A-transactivated protein 9 homolog                       | 1   | 158,682,411 | 158,724,518 | 8117                    | in gene                      | 4.00     |
| NM_023884                     | Ralgs2        | Ral GEF with PH domain and SH3 binding motif 2                             | 1   | 158,738,253 | 158,869,711 | 751                     | in gene                      | 5.00     |
| XM_001472276,<br>XM_001479264 | 4930439D14Rik | RIKEN cDNA 4930439D14 gene                                                 | 1   | 158,868,925 | 158,870,326 | 35                      | in gene                      | 5.00     |
| NM_022312                     | Tnr           | tenascin R                                                                 | 1   | 161,453,900 | 161,854,606 | 347348                  | in gene                      | 8.00     |
| NM_001038621,<br>NM_013862    | Rabgap1l      | RAB GTPase activating protein 1-like                                       | 1   | 162,149,305 | 162,723,069 | 494301                  | in gene                      | 7.00     |
| NM_001039482                  | Klhl20        | kelch-like 20 (Drosophila)                                                 | 1   | 163,018,509 | 163,061,610 | -22                     | upstream                     | 8.00     |
| XM_001479494,<br>XM_975051    | AI848100      | expressed sequence AI848100                                                | 1   | 163,746,243 | 163,807,276 | 1356                    | in gene                      | 6.00     |
| NM_008030                     | Fmo3          | flavin containing monooxygenase 3                                          | 1   | 164,883,931 | 164,914,622 | 5086                    | in gene                      | 7.00     |
| NM_010629                     | Kifap3        | kinesin-associated protein 3                                               | 1   | 165,709,810 | 165,847,231 | 114350                  | in gene                      | 6.00     |
| NM_001081126                  | Gpr161        | G protein-coupled receptor 161                                             | 1   | 167,225,897 | 167,251,982 | 25991                   | in gene                      | 10.00    |
| XM_917541,<br>XM_976438       | lqwd1         | IQ motif and WD repeats 1                                                  | 1   | 167,257,458 | 167,390,596 | 138708, 82708, 345      | downstream, in gene, in gene | 6.67     |
| NM_027430                     | Brp44         | brain protein 44                                                           | 1   | 167,391,339 | 167,411,345 | -1088, 18565            | upstream, in gene            | 4.00     |
| NM_173029                     | Sacy          | soluble adenyllyl cyclase                                                  | 1   | 167,415,314 | 167,506,904 | -5410, 96014            | upstream, downstream         | 5.00     |
| NM_175461                     | C030014K22Rik | RIKEN cDNA C030014K22 gene                                                 | 1   | 168,931,606 | 169,021,140 | 1148                    | in gene                      | 4.00     |
| NM_001039483                  | Tmco1         | transmembrane and coiled-coil domains 1                                    | 1   | 169,238,801 | 169,264,109 | 28890                   | downstream                   | 4.00     |
| NM_008783,<br>NM_183355       | Pbx1          | pre B-cell leukemia transcription factor 1                                 | 1   | 170,049,495 | 170,362,389 | 56773, 15349, -427      | in gene, in gene, upstream   | 7.33     |
| NM_023284                     | Nuf2          | NUF2, NDC80 kinetochore complex component, homolog (S. cerevisiae)         | 1   | 171,428,065 | 171,461,595 | 37275                   | downstream                   | 4.00     |
| NM_022563                     | Ddr2          | discoidin domain receptor family, member 2                                 | 1   | 171,907,777 | 172,040,690 | 45362                   | in gene                      | 6.00     |
| XM_001475554                  | LOC100040571  | hypothetical protein LOC100040571                                          | 1   | 172,004,334 | 172,005,222 | -9006                   | upstream                     | 6.00     |
| NM_023173                     | Dusp12        | dual specificity phosphatase 12                                            | 1   | 172,804,319 | 172,815,671 | 3943                    | in gene                      | 6.00     |
| NM_001029984                  | Fcrlb         | Fc receptor-like B                                                         | 1   | 172,837,404 | 172,843,072 | -1205                   | upstream                     | 4.00     |
| NM_145141                     | Fcrla         | Fc receptor-like A                                                         | 1   | 172,848,017 | 172,857,671 | 13394                   | downstream                   | 4.00     |
| XM_484933,<br>XM_917594       | Pcp4l1        | Purkinje cell protein 4-like 1                                             | 1   | 173,103,390 | 173,127,166 | 926                     | in gene                      | 4.00     |
| NM_020579                     | B4galt3       | UDP-Gal:betaGlcNAc beta 1,4-galactosyltransferase, polypeptide 3           | 1   | 173,200,519 | 173,207,026 | -6087                   | upstream                     | 4.00     |
| NM_018729                     | Cd244         | CD244 natural killer cell receptor 2B4                                     | 1   | 173,489,324 | 173,515,447 | -364                    | upstream                     | 5.00     |
| NM_033509                     | Vangl2        | vang-like 2 (van gogh, Drosophila)                                         | 1   | 173,934,502 | 173,957,399 | 5431                    | in gene                      | 5.00     |
| XM_001474255                  | LOC100040199  | similar to Ubif protein                                                    | 1   | 173,959,277 | 173,964,464 | -7309                   | upstream                     | 5.00     |
| NM_019445                     | Fmn2          | formin 2                                                                   | 1   | 176,419,303 | 176,752,208 | 35673                   | in gene                      | 7.00     |
|                               | B230369F24Rik | RIKEN cDNA B230369F24 gene                                                 | 1   | 180,245,164 | 180,245,590 | -3731                   | upstream                     | 5.00     |
| XM_001473597,<br>XM_001478186 | LOC669454     | similar to RIKEN cDNA B230369F24 gene                                      | 1   | 180,247,224 | 180,249,233 | 2097                    | downstream                   | 5.00     |
| NM_025511                     | 2310005N03Rik | RIKEN cDNA 2310005N03 gene                                                 | 1   | 180,249,284 | 180,252,824 | 37                      | in gene                      | 5.00     |
| NM_026626                     | Efcab2        | EF-hand calcium binding domain 2                                           | 1   | 180,336,012 | 180,413,381 | 45012                   | in gene                      | 5.00     |
| NM_177724                     | D230039L06Rik | RIKEN cDNA D230039L06 gene                                                 | 1   | 180,459,256 | 180,646,631 | -1560, 111848           | upstream, in gene            | 5.00     |
| NM_027188                     | Smyd3         | SET and MYND domain containing 3                                           | 1   | 180,885,162 | 181,448,134 | 538982                  | in gene                      | 7.00     |
| NM_001081175                  | Itpkb         | inositol 1,4,5-trisphosphate 3-kinase B                                    | 1   | 182,260,607 | 182,353,790 | 89649                   | in gene                      | 7.00     |
| NM_177099                     | Lefty2        | Left-right determination factor 2                                          | 1   | 182,823,250 | 182,829,234 | -3090                   | upstream                     | 6.00     |
| NM_012058                     | Srp9          | signal recognition particle 9                                              | 1   | 184,054,881 | 184,062,519 | -9409                   | upstream                     | 5.00     |
| XM_001472215                  | LOC100039079  | similar to Snf5p                                                           | 1   | 186,686,428 | 186,690,074 | 1647                    | in gene                      | 5.00     |
| NM_178692                     | C130074G19Rik | RIKEN cDNA C130074G19 gene                                                 | 1   | 186,695,805 | 186,706,915 | 18488                   | downstream                   | 5.00     |
| NM_009367                     | Tgfb2         | transforming growth factor, beta 2                                         | 1   | 188,447,521 | 188,529,868 | -2580                   | upstream                     | 6.00     |
| NM_028848                     | Spat17        | spermatogenesis associated 17                                              | 1   | 188,872,285 | 189,039,344 | 0                       | in gene                      | 7.00     |
| NM_026367                     | Gpatch2       | G patch domain containing 2                                                | 1   | 189,039,418 | 189,175,324 | -74                     | upstream                     | 7.00     |
| NM_026796                     | Smyd2         | SET and MYND domain containing 2                                           | 1   | 191,704,371 | 191,746,167 | 55                      | in gene                      | 7.00     |
| NM_008937                     | Prox1         | prospero-related homeobox 1                                                | 1   | 191,945,654 | 191,994,559 | 41119, -1473            | in gene, upstream            | 6.00     |
| NM_007498                     | Atf3          | activating transcription factor 3                                          | 1   | 192,994,175 | 193,007,212 | -148                    | upstream                     | 7.00     |
| XR_035313,<br>XR_035377       | A730013G03Rik | RIKEN cDNA A730013G03 gene                                                 | 1   | 194,659,313 | 194,661,407 | 10639, 5615             | downstream, downstream       | 4.50     |
| NM_198247                     | Sertad4       | SERTA domain containing 4                                                  | 1   | 194,670,682 | 194,681,915 | -85                     | upstream                     | 5.00     |



| Accession No.                   | Symbol        | Gene Title                                                        | Chr | Gene Start  | Gene End    | Interval Dists to Start | Interval Pos           | Avg Peak |
|---------------------------------|---------------|-------------------------------------------------------------------|-----|-------------|-------------|-------------------------|------------------------|----------|
| NM_145415                       | AA408296      | expressed sequence AA408296                                       | 1   | 194,930,597 | 194,956,445 | -67                     | upstream               | 11.00    |
| NM_010778                       | Cd46          | CD46 antigen, complement regulatory protein                       | 1   | 196,868,094 | 196,918,442 | 29898                   | in gene                | 6.00     |
| NM_172475                       | Frm4a         | FERM domain containing 4A                                         | 2   | 4,073,918   | 4,534,988   | 260738                  | in gene                | 4.00     |
| NM_177343                       | Camk1d        | calcium/calmodulin-dependent protein kinase ID                    | 2   | 5,214,503   | 5,635,710   | 314750, 77246           | in gene, in gene       | 5.00     |
| NM_001081131                    | Dhtkd1        | dehydrogenase E1 and transketolase domain containing 1            | 2   | 5,817,140   | 5,863,838   | -8418                   | upstream               | 11.00    |
| NM_001081132                    | Upf2          | UPF2 regulator of nonsense transcripts homolog (yeast)            | 2   | 5,872,515   | 5,977,749   | -259                    | upstream               | 11.00    |
| NM_010582                       | Itih2         | inter-alpha trypsin inhibitor, heavy chain 2                      | 2   | 10,016,218  | 10,052,290  | -9998                   | upstream               | 6.00     |
| NM_152824                       | Rbm17         | RNA binding motif protein 17                                      | 2   | 11,507,066  | 11,524,826  | 26                      | in gene                | 5.00     |
| NM_010067                       | Trdmt1        | tRNA aspartic acid methyltransferase 1                            | 2   | 13,431,791  | 13,466,291  | 291                     | in gene                | 7.00     |
| NM_011484                       | Stam          | signal transducing adaptor molecule (SH3 domain and ITAM motif) 1 | 2   | 13,995,739  | 14,069,965  | -91                     | upstream               | 6.00     |
| NM_008845                       | Pip5k2a       | phosphatidylinositol-4-phosphate 5-kinase, type II, alpha         | 2   | 18,763,883  | 18,919,748  | 67348, 29620            | in gene, in gene       | 6.00     |
| NM_001042528, NM_007579         | Cacna1b       | calcium channel, voltage-dependent, N type, alpha 1B subunit      | 2   | 24,461,895  | 24,618,672  | 1424                    | in gene                | 5.00     |
| NM_178408                       | Arrdc1        | arrestin domain containing 1                                      | 2   | 24,780,872  | 24,790,683  | 15867                   | downstream             | 7.00     |
| NM_028093                       | Entpd8        | ectonucleoside triphosphate diphosphohydrolase 8                  | 2   | 24,935,843  | 24,941,239  | 11341                   | downstream             | 5.00     |
| NM_172204                       | Noxa1         | NADPH oxidase activator 1                                         | 2   | 24,941,187  | 24,950,668  | 3484                    | in gene                | 5.00     |
| NM_009849                       | Entpd2        | ectonucleoside triphosphate diphosphohydrolase 2                  | 2   | 25,251,478  | 25,256,838  | 234                     | in gene                | 6.00     |
| NM_008721                       | Npdc1         | neural proliferation, differentiation and control gene 1          | 2   | 25,258,603  | 25,265,014  | -6891                   | upstream               | 6.00     |
| NM_009422                       | Traf2         | Tnf receptor-associated factor 2                                  | 2   | 25,373,502  | 25,402,414  | 9326, -82               | in gene, upstream      | 6.00     |
| NM_021519                       | Edf1          | endothelial differentiation-related factor 1                      | 2   | 25,413,420  | 25,417,598  | -236                    | upstream               | 6.00     |
| XM_358556, XM_913936            | C330006A16Rik | RIKEN cDNA C330006A16 gene                                        | 2   | 25,992,331  | 25,995,853  | 461, -1779              | in gene, upstream      | 7.00     |
| NM_153559                       | Qscn6l1       | quiescin Q6-like 1                                                | 2   | 26,064,650  | 26,092,940  | 5868                    | in gene                | 5.00     |
| NM_153410                       | Gpsm1         | G-protein signalling modulator 1 (AGS3-like, C. elegans)          | 2   | 26,171,060  | 26,203,755  | 36716                   | downstream             | 5.00     |
| NM_026828                       | D2Bwg1335e    | DNA segment, Chr 2, Brigham & Women's Genetics 1335 expressed     | 2   | 26,203,643  | 26,207,630  | -146                    | upstream               | 5.00     |
| XM_285326, XM_914859            | Card9         | caspase recruitment domain family, member 9                       | 2   | 26,207,832  | 26,215,067  | 7291                    | downstream             | 5.00     |
| NM_178444, NM_198724, NM_198725 | Egfl7         | EGF-like domain 7                                                 | 2   | 26,436,603  | 26,448,202  | -9371                   | upstream               | 5.00     |
| NM_011512                       | Surf4         | surfeit gene 4                                                    | 2   | 26,775,559  | 26,789,448  | 616                     | in gene                | 7.00     |
| NM_198628                       | Gm711         | gene model 711, (NCBI)                                            | 2   | 26,789,589  | 26,809,016  | -757                    | upstream               | 7.00     |
| NM_029981                       | Adamsl2       | ADAMTS-like 2                                                     | 2   | 26,934,901  | 26,964,133  | 13723                   | in gene                | 5.00     |
| NM_138942                       | Dbh           | dopamine beta hydroxylase                                         | 2   | 27,021,027  | 27,038,724  | -6827                   | upstream               | 4.00     |
| NM_009500                       | Vav2          | vav 2 oncogene                                                    | 2   | 27,119,155  | 27,282,347  | 35387                   | in gene                | 5.00     |
| NM_015734                       | Col5a1        | procollagen, type V, alpha 1                                      | 2   | 27,742,205  | 27,893,044  | 106819                  | in gene                | 6.00     |
| NM_027040                       | 1700007K13Rik | RIKEN cDNA 1700007K13 gene                                        | 2   | 28,317,521  | 28,321,844  | -1980                   | upstream               | 5.00     |
| NM_080452                       | Mrps2         | mitochondrial ribosomal protein S2                                | 2   | 28,323,586  | 28,326,697  | 238                     | in gene                | 5.00     |
| NM_009058                       | Ralgds        | ral guanine nucleotide dissociation stimulator                    | 2   | 28,368,851  | 28,408,590  | 12504, 38685            | in gene, in gene       | 6.50     |
| NM_009885                       | Cel           | carboxyl ester lipase                                             | 2   | 28,411,339  | 28,418,882  | 11346                   | downstream             | 7.00     |
| NM_148928                       | Gtf3c5        | general transcription factor IIIC, polypeptide 5                  | 2   | 28,421,835  | 28,438,766  | 302                     | in gene                | 5.00     |
| NM_008114                       | Gfi1b         | growth factor independent 1B                                      | 2   | 28,464,977  | 28,477,464  | -8168                   | upstream               | 5.00     |
| NM_001033874                    | 1190002A17Rik | RIKEN cDNA 1190002A17 gene                                        | 2   | 28,555,684  | 28,668,678  | 99628                   | in gene                | 9.00     |
| NM_172977                       | Gtf3c4        | general transcription factor IIIC, polypeptide 4                  | 2   | 28,681,095  | 28,695,806  | 3582                    | in gene                | 6.00     |
| NM_001033294                    | Ddx31         | DEAD/H (Asp-Glu-Ala-Asp/His) box polypeptide 31                   | 2   | 28,696,257  | 28,761,090  | -4033                   | upstream               | 6.00     |
| NM_019446                       | Barh1         | BarH-like 1 (Drosophila)                                          | 2   | 28,763,199  | 28,771,941  | -1291                   | upstream               | 6.00     |
| XM_986644, XM_994340            | 1700101E01Rik | RIKEN cDNA 1700101E01 gene                                        | 2   | 28,810,893  | 28,910,586  | 83690, 31034            | in gene, in gene       | 6.50     |
| NM_198033                       | Setx          | senataxin                                                         | 2   | 28,980,512  | 29,037,991  | 56363                   | in gene                | 4.00     |
| NM_026896                       | Crsp8         | cofactor required for Sp1 transcriptional activation, subunit 8   | 2   | 29,202,356  | 29,380,308  | 76156                   | in gene                | 6.00     |
| NM_207298                       | Ceecam1       | cerebral endothelial cell adhesion molecule 1                     | 2   | 29,725,014  | 29,738,360  | 20154, 21354            | downstream, downstream | 5.00     |
| NM_013615                       | Odf2          | outer dense fiber of sperm tails 2                                | 2   | 29,745,620  | 29,778,059  | -452, 748               | upstream, in gene      | 5.00     |
| NM_028923                       | Gle1l         | GLE1 RNA export mediator-like (yeast)                             | 2   | 29,790,947  | 29,814,175  | 30344                   | downstream             | 4.00     |
| XM_977598, XM_990997            | LOC665532     | hypothetical protein LOC665532                                    | 2   | 29,821,114  | 29,822,669  | 177                     | in gene                | 4.00     |
| NM_153805                       | Pkn3          | protein kinase N3                                                 | 2   | 29,934,286  | 29,946,539  | 15090                   | downstream             | 8.00     |
| NM_001037762, NM_025428         | Zdhhc12       | zinc finger, DHHC domain containing 12                            | 2   | 29,946,464  | 29,949,155  | -221                    | upstream               | 8.00     |
| NM_178694                       | Zer1          | zer-1 homolog (C. elegans)                                        | 2   | 29,952,803  | 29,979,974  | 30598, -133             | downstream, upstream   | 8.50     |
| XM_001477522                    | LOC100041114  | hypothetical protein LOC100041114                                 | 2   | 29,979,592  | 29,981,849  | 515                     | in gene                | 9.00     |
| NM_146252                       | Tbc1d13       | TBC1 domain family, member 13                                     | 2   | 29,989,391  | 30,007,533  | -9284                   | upstream               | 9.00     |
| NM_007931                       | Endog         | endonuclease G                                                    | 2   | 30,027,044  | 30,029,589  | 6668                    | downstream             | 6.00     |
| NM_172660                       | D2Wsu81e      | DNA segment, Chr 2, Wayne State University 81, expressed          | 2   | 30,028,993  | 30,033,975  | 263                     | in gene                | 6.00     |
| XM_978420                       | EG665645      | predicted gene, EG665645                                          | 2   | 30,628,164  | 30,638,926  | -4620                   | upstream               | 5.00     |
| NM_009116                       | Prrx2         | paired related homeobox 2                                         | 2   | 30,700,801  | 30,736,773  | 19423                   | in gene                | 5.00     |

| Accession No.                         | Symbol             | Gene Title                                                                                                   | Chr | Gene Start | Gene End   | Interval Dists to Start    | Interval Pos                            | Avg Peak |
|---------------------------------------|--------------------|--------------------------------------------------------------------------------------------------------------|-----|------------|------------|----------------------------|-----------------------------------------|----------|
| NM_028846                             | Usp20              | ubiquitin specific peptidase 20                                                                              | 2   | 30,851,562 | 30,879,106 | 8742                       | in gene                                 | 5.00     |
| NM_019681                             | Freq               | frequenin homolog (Drosophila)                                                                               | 2   | 31,101,443 | 31,150,992 | -2163, 50653               | upstream, downstream                    | 5.50     |
| NM_001033389                          | Fubp3              | far upstream element (FUSE) binding protein 3                                                                | 2   | 31,428,337 | 31,473,039 | 37391                      | in gene                                 | 5.00     |
| NM_011836                             | Lamc3              | laminin gamma 3                                                                                              | 2   | 31,742,801 | 31,802,055 | 6111                       | in gene                                 | 5.00     |
| NM_145521                             | Ppapdc3            | phosphatidic acid phosphatase type 2 domain containing 3                                                     | 2   | 31,951,171 | 31,966,340 | 6965                       | in gene                                 | 4.00     |
| NM_172661                             | 5830434P21Rik      | RIKEN cDNA 5830434P21 gene                                                                                   | 2   | 32,037,978 | 32,090,045 | 24187                      | in gene                                 | 4.00     |
| NM_145145                             | Pomt1              | protein-O-mannosyltransferase 1                                                                              | 2   | 32,092,203 | 32,110,525 | 10421                      | in gene                                 | 5.00     |
| NM_011675                             | Uck1               | uridine-cytidine kinase 1                                                                                    | 2   | 32,110,522 | 32,115,581 | 12957                      | downstream                              | 5.00     |
| NM_146118                             | Slc25a25           | solute carrier family 25 (mitochondrial carrier, phosphate carrier), member 25                               | 2   | 32,270,000 | 32,306,942 | 28638                      | in gene                                 | 7.00     |
| NM_198191                             | Pip5k1             | phosphatidylinositol-4-phosphate 5-kinase-like 1                                                             | 2   | 32,431,339 | 32,439,299 | 14229                      | downstream                              | 5.00     |
| NM_011373                             | St6galnac4         | ST6 (alpha-N-acetyl-neuraminy-2,3-beta-galactosyl-1,3)-N-acetylgalactosaminide alpha-2,6-sialyltransferase 4 | 2   | 32,443,010 | 32,456,002 | 2558                       | in gene                                 | 5.00     |
| NM_001025310, NM_001025311, NM_016973 | St6galnac6         | ST6 (alpha-N-acetyl-neuraminy-2,3-beta-galactosyl-1,3)-N-acetylgalactosaminide alpha-2,6-sialyltransferase 6 | 2   | 32,455,229 | 32,476,324 | -9661                      | upstream                                | 5.00     |
| NM_007932                             | Eng                | endoglin                                                                                                     | 2   | 32,502,115 | 32,537,638 | 333, 9389                  | in gene, in gene                        | 6.50     |
| NM_010236                             | Fpgs               | folylpolyglutamyl synthetase                                                                                 | 2   | 32,538,129 | 32,549,652 | -700                       | upstream                                | 6.00     |
| NM_130860                             | Cdk9               | cyclin-dependent kinase 9 (CDC2-related kinase)                                                              | 2   | 32,562,958 | 32,568,305 | -2687                      | upstream                                | 5.00     |
| NM_199302                             | Lrsam1             | leucine rich repeat and sterile alpha motif containing 1                                                     | 2   | 32,780,740 | 32,816,771 | -717                       | upstream                                | 6.00     |
| NR_002898                             | Snora65            | small nucleolar RNA, H/ACA box 65                                                                            | 2   | 32,818,975 | 32,819,574 | -1487                      | upstream                                | 6.00     |
| NM_175211                             | Ralgps1            | Ral GEF with PH domain and SH3 binding motif 1                                                               | 2   | 32,992,493 | 33,226,998 | 240758, 182486, 15793      | downstream, in gene, in gene            | 4.67     |
| NM_010725                             | Lmx1b              | LIM homeobox transcription factor 1 beta                                                                     | 2   | 33,420,156 | 33,496,031 | 82047                      | downstream                              | 5.00     |
| NM_175184                             | 2610528K11Rik      | RIKEN cDNA 2610528K11 gene                                                                                   | 2   | 33,585,476 | 33,743,466 | 92090                      | in gene                                 | 9.00     |
| NM_177345                             | Mapkap1            | mitogen-activated protein kinase associated protein 1                                                        | 2   | 34,287,545 | 34,480,470 | 138503                     | in gene                                 | 6.00     |
| NM_028921                             | Tll11              | tubulin tyrosine ligase-like family, member 11                                                               | 2   | 35,607,467 | 35,796,326 | 130598, 128134             | in gene, in gene                        | 6.00     |
| NM_026434                             | Rbm18              | RNA binding motif protein 18                                                                                 | 2   | 35,971,601 | 35,992,131 | -157                       | upstream                                | 5.00     |
| XM_001479253                          | LOC100042236       | hypothetical protein LOC100042236                                                                            | 2   | 35,991,488 | 35,994,337 | 2049                       | in gene                                 | 5.00     |
| NM_026422                             | Mrf                | mitochondrial ribosome recycling factor                                                                      | 2   | 35,992,187 | 36,045,390 | 101                        | in gene                                 | 5.00     |
| NM_199025                             | Zbtb26             | zinc finger and BTB domain containing 26                                                                     | 2   | 37,287,688 | 37,298,641 | -90                        | upstream                                | 5.00     |
| NM_001033960, NM_146121               | Rabgap1            | RAB GTPase activating protein 1                                                                              | 2   | 37,298,805 | 37,421,957 | -74                        | upstream                                | 5.00     |
| NM_010264                             | Nr6a1              | nuclear receptor subfamily 6, group A, member 1                                                              | 2   | 38,578,890 | 38,783,208 | 167592                     | in gene                                 | 6.00     |
| XM_001475741                          | LOC100041071       | hypothetical protein LOC100041071                                                                            | 2   | 38,852,257 | 38,853,805 | -6979, -9603               | upstream, upstream                      | 6.50     |
| NM_029687                             | 1700123D08Rik      | RIKEN cDNA 1700123D08 gene                                                                                   | 2   | 38,852,996 | 38,861,688 | 7788, 10412                | in gene, downstream                     | 6.50     |
| NM_025592                             | Rpl35              | ribosomal protein L35                                                                                        | 2   | 38,857,101 | 38,860,651 | -133, -2757                | upstream, upstream                      | 6.50     |
| NM_028809                             | Arpc5l             | actin related protein 2/3 complex, subunit 5-like                                                            | 2   | 38,863,659 | 38,871,392 | -2875, -251                | upstream, upstream                      | 6.50     |
| NM_029793                             | Golga1             | golgi autoantigen, golgin subfamily a, 1                                                                     | 2   | 38,872,023 | 38,920,926 | 57518                      | downstream                              | 5.00     |
| NM_178778                             | A930041I02Rik      | RIKEN cDNA A930041I02 gene                                                                                   | 2   | 38,921,734 | 39,046,250 | 16394                      | in gene                                 | 5.00     |
| NM_001025377, NM_153820               | Arhgap15           | Rho GTPase activating protein 15                                                                             | 2   | 43,604,344 | 44,243,143 | 399336                     | in gene                                 | 9.00     |
| NM_015753                             | Zeb2               | zinc finger E-box binding homeobox 2                                                                         | 2   | 44,839,154 | 44,968,799 | 51007                      | in gene                                 | 5.00     |
| NM_177139                             | Lypd6              | LY6/PLAUR domain containing 6                                                                                | 2   | 49,983,890 | 50,049,084 | -7986                      | upstream                                | 6.00     |
| XM_130232, XM_976519                  | Neb                | nebulin                                                                                                      | 2   | 51,991,953 | 52,194,318 | 100782                     | in gene                                 | 5.00     |
| XM_894739, XM_905830                  | OTTMUSG00000012638 | predicted gene, OTTMUSG00000012638                                                                           | 2   | 52,475,248 | 52,476,144 | 4368                       | downstream                              | 6.00     |
| NM_018785                             | Prpf40a            | PRP40 pre-mRNA processing factor 40 homolog A (yeast)                                                        | 2   | 52,997,509 | 53,050,221 | 1093                       | in gene                                 | 4.00     |
| NM_022989                             | Arf6ip6            | ADP-ribosylation factor-like 6 interacting protein 6                                                         | 2   | 53,051,145 | 53,078,060 | -2017                      | upstream                                | 4.00     |
| NM_008867                             | Pla2r1             | phospholipase A2 receptor 1                                                                                  | 2   | 60,257,096 | 60,391,318 | 1878                       | in gene                                 | 6.00     |
| NM_020296                             | Rbms1              | RNA binding motif, single stranded interacting protein 1                                                     | 2   | 60,590,779 | 60,800,977 | 117041, 100961             | in gene, in gene                        | 6.50     |
| NM_001081088                          | Lrp2               | low density lipoprotein receptor-related protein 2                                                           | 2   | 69,262,392 | 69,424,124 | 79377                      | in gene                                 | 5.00     |
| NM_177784                             | Klh23              | kelch-like 23 (Drosophila)                                                                                   | 2   | 69,660,530 | 69,674,705 | 398                        | in gene                                 | 5.00     |
| NM_009278                             | Ssb                | Sjogren syndrome antigen B                                                                                   | 2   | 69,699,685 | 69,709,861 | 15739                      | downstream                              | 5.00     |
| NM_029280                             | Mettl5             | methyltransferase like 5                                                                                     | 2   | 69,715,805 | 69,723,661 | 8237                       | downstream                              | 5.00     |
| XR_002332, XR_005156                  | 4930550G17Rik      | RIKEN cDNA 4930550G17 gene                                                                                   | 2   | 69,723,552 | 69,724,697 | 9273                       | downstream                              | 5.00     |
| NM_022435                             | Sp5                | trans-acting transcription factor 5                                                                          | 2   | 70,312,980 | 70,315,783 | -372, 1756                 | upstream, in gene                       | 5.50     |
| NM_025744                             | 4933404M02Rik      | RIKEN cDNA 4933404M02 gene                                                                                   | 2   | 70,346,876 | 70,378,941 | 39724                      | downstream                              | 4.00     |
| NM_172664                             | Tlk1               | tousled-like kinase 1                                                                                        | 2   | 70,550,464 | 70,663,537 | 106257                     | in gene                                 | 7.00     |
| XM_984549, XM_992510                  | 1700109F18Rik      | RIKEN cDNA 1700109F18 gene                                                                                   | 2   | 74,548,101 | 74,550,583 | 11767, 6551, 2807          | downstream, downstream, downstream      | 6.33     |
| NM_010468                             | Hoxd3              | homeo box D3                                                                                                 | 2   | 74,550,050 | 74,586,328 | -6018, -2274, 23561, 41614 | upstream, upstream, in gene, downstream | 5.75     |

| Accession No.                               | Symbol        | Gene Title                                                                               | Chr | Gene Start  | Gene End    | Interval Dists to Start | Interval Pos                  | Avg Peak |
|---------------------------------------------|---------------|------------------------------------------------------------------------------------------|-----|-------------|-------------|-------------------------|-------------------------------|----------|
| NM_010469                                   | Hoxd4         | homeo box D4                                                                             | 2   | 74,560,035  | 74,567,217  | 13576                   | downstream                    | 5.00     |
|                                             | Mirn10b       | microRNA 10b                                                                             | 2   | 74,564,126  | 74,564,193  | 9485                    | downstream                    | 5.00     |
| XM_984655,<br>XM_992575                     | LOC667804     | hypothetical protein LOC667804                                                           | 2   | 74,588,730  | 74,591,799  | 2934                    | in gene                       | 5.00     |
| NM_010467                                   | Hoxd1         | homeo box D1                                                                             | 2   | 74,601,037  | 74,603,199  | -9373                   | upstream                      | 5.00     |
| NM_010902                                   | Nfe2l2        | nuclear factor, erythroid derived 2, like 2                                              | 2   | 75,513,576  | 75,542,698  | 1034                    | in gene                       | 8.00     |
| XM_001475569,<br>XM_001476920               | E030042O20Rik | RIKEN cDNA E030042O20 gene                                                               | 2   | 75,542,792  | 75,548,082  | -1128                   | upstream                      | 8.00     |
| NM_001025576                                | 2610301F02Rik | RIKEN cDNA 2610301F02 gene                                                               | 2   | 76,883,028  | 77,008,693  | 85, -1131               | in gene, upstream             | 7.50     |
| NM_178723                                   | Zfp533        | zinc finger protein 533                                                                  | 2   | 77,249,157  | 77,654,873  | 179033                  | in gene                       | 6.00     |
| NM_026934                                   | Zc3h15        | zinc finger CCCH-type containing 15                                                      | 2   | 83,484,735  | 83,504,774  | -159                    | upstream                      | 8.00     |
| NM_008402                                   | Ilgav         | integrin alpha V                                                                         | 2   | 83,564,672  | 83,643,964  | 55968                   | in gene                       | 7.00     |
| NM_011576                                   | Tfpi          | tissue factor pathway inhibitor                                                          | 2   | 84,273,017  | 84,314,331  | -7941                   | upstream                      | 5.00     |
| NM_133840                                   | Clp1          | CLP1, cleavage and polyadenylation factor I subunit, homolog (S. cerevisiae)             | 2   | 84,563,279  | 84,567,425  | -7071                   | upstream                      | 4.00     |
| NM_001005342                                | Ypel4         | yippee-like 4 (Drosophila)                                                               | 2   | 84,574,361  | 84,578,034  | 135                     | in gene                       | 4.00     |
|                                             | Mirn130a      | microRNA 130a                                                                            | 2   | 84,581,271  | 84,581,334  | 6838                    | downstream                    | 4.00     |
| NM_182990                                   | Ssrp1         | structure specific recognition protein 1                                                 | 2   | 84,877,358  | 84,887,268  | 10722                   | downstream                    | 6.00     |
| NM_001081260                                | Tnks1bp1      | tankyrase 1 binding protein 1                                                            | 2   | 84,888,928  | 84,917,286  | -848                    | upstream                      | 6.00     |
| NM_011355                                   | Sfpi1         | SFFV proviral integration 1                                                              | 2   | 90,936,954  | 90,955,913  | 4758                    | in gene                       | 6.00     |
| NM_013839                                   | Nr1h3         | nuclear receptor subfamily 1, group H, member 3                                          | 2   | 91,024,219  | 91,035,192  | -7688                   | upstream                      | 7.00     |
| NM_007387                                   | Acp2          | acid phosphatase 2, lysosomal                                                            | 2   | 91,043,087  | 91,052,300  | -207                    | upstream                      | 7.00     |
| NM_028119                                   | Ddb2          | damage specific DNA binding protein 2                                                    | 2   | 91,052,013  | 91,077,135  | 34255, 223, -5361       | downstream, in gene, upstream | 5.67     |
| NM_028733,<br>NM_030880                     | Pacsin3       | protein kinase C and casein kinase substrate in neurons 3                                | 2   | 91,092,758  | 91,104,835  | 4810, 8402              | in gene, in gene              | 5.00     |
| NM_023854                                   | Zfp289        | zinc finger protein 289                                                                  | 2   | 91,105,463  | 91,117,088  | -7895, -4303            | upstream, upstream            | 5.00     |
| NM_001080754,<br>NM_172669                  | D030051N19Rik | RIKEN cDNA D030051N19 gene                                                               | 2   | 91,570,295  | 91,759,006  | 191545                  | downstream                    | 6.00     |
| NM_007699                                   | Chrm4         | cholinergic receptor, muscarinic 4                                                       | 2   | 91,767,406  | 91,768,845  | -5566                   | upstream                      | 6.00     |
| NM_001012335,<br>NM_001012336,<br>NM_010784 | Mdk           | midkine                                                                                  | 2   | 91,769,978  | 91,772,439  | 10599                   | downstream                    | 6.00     |
| NM_138306                                   | Dgkz          | diacylglycerol kinase zeta                                                               | 2   | 91,772,983  | 91,803,756  | 3612                    | in gene                       | 7.00     |
| NM_011957                                   | Creb3l1       | cAMP responsive element binding protein 3-like 1                                         | 2   | 91,822,485  | 91,864,327  | 11255                   | in gene                       | 6.00     |
| NM_172670                                   | Gylt1b        | glycosyltransferase-like 1B                                                              | 2   | 92,205,209  | 92,211,168  | -9552                   | upstream                      | 5.00     |
| NM_145122                                   | Pex16         | peroxisome biogenesis factor 16                                                          | 2   | 92,215,655  | 92,221,374  | 5065                    | in gene                       | 5.00     |
| NM_183112                                   | 1700029I15Rik | RIKEN cDNA 1700029I15 gene                                                               | 2   | 92,223,075  | 92,223,758  | -2355                   | upstream                      | 5.00     |
| NM_011162                                   | Mapk8ip1      | mitogen activated protein kinase 8 interacting protein 1                                 | 2   | 92,223,837  | 92,241,420  | 20700                   | downstream                    | 5.00     |
| NM_009963                                   | Cry2          | cryptochrome 2 (photolyase-like)                                                         | 2   | 92,243,803  | 92,274,185  | 10089                   | in gene                       | 7.00     |
| NM_183180                                   | Tspan18       | tetraspanin 18                                                                           | 2   | 93,041,917  | 93,174,607  | 50847, 1663, -7473      | in gene, in gene, upstream    | 6.33     |
| XM_001478824                                | LOC100042789  | hypothetical protein LOC100042789                                                        | 2   | 93,151,420  | 93,174,812  | 1868, -7268             | in gene, upstream             | 6.50     |
| NM_183220                                   | 2610203E10Rik | RIKEN cDNA 2610203E10 gene                                                               | 2   | 93,675,610  | 93,689,933  | -2763                   | upstream                      | 4.00     |
| NM_001033452                                | Gm1967        | gene model 1967, (NCBI)                                                                  | 2   | 93,695,520  | 93,709,260  | 16564                   | downstream                    | 4.00     |
| NM_178886                                   | Ldlrad3       | low density lipoprotein receptor class A domain containing 3                             | 2   | 101,790,358 | 102,026,534 | 122198                  | in gene                       | 5.00     |
| NM_001039150,<br>NM_001039151,<br>NM_009851 | Cd44          | CD44 antigen                                                                             | 2   | 102,651,298 | 102,741,822 | 2110                    | in gene                       | 4.00     |
| NM_010125                                   | Elf5          | E74-like factor 5                                                                        | 2   | 103,264,234 | 103,291,142 | 12694                   | in gene                       | 6.00     |
| NM_009804                                   | Cat           | catalase                                                                                 | 2   | 103,294,160 | 103,325,277 | 2077                    | in gene                       | 5.00     |
| NM_178890                                   | Abtb2         | ankyrin repeat and BTB (POZ) domain containing 2                                         | 2   | 103,406,467 | 103,558,580 | 717                     | in gene                       | 5.00     |
| NM_153126                                   | Nat10         | N-acetyltransferase 10                                                                   | 2   | 103,561,416 | 103,601,407 | -129                    | upstream                      | 15.00    |
| NM_016739                                   | Caprin1       | cell cycle associated protein 1                                                          | 2   | 103,605,176 | 103,637,754 | 36218, 706, -390        | downstream, in gene, upstream | 9.00     |
| NM_009037                                   | Rcn1          | reticulocalbin 1                                                                         | 2   | 105,226,105 | 105,239,476 | -236                    | upstream                      | 6.00     |
| NM_133749                                   | 2900064A13Rik | RIKEN cDNA 2900064A13 gene                                                               | 2   | 112,295,182 | 112,307,593 | -78                     | upstream                      | 7.00     |
| NM_033524                                   | Spred1        | sprouty protein with EVH-1 domain 1, related sequence                                    | 2   | 116,947,186 | 117,005,073 | -594                    | upstream                      | 4.00     |
| NM_009273                                   | Srp14         | signal recognition particle 14                                                           | 2   | 118,301,579 | 118,305,432 | -7400                   | upstream                      | 7.00     |
| NM_001033254                                | Pak6          | p21 (CDKN1A)-activated kinase 6                                                          | 2   | 118,489,039 | 118,522,972 | 14737                   | in gene                       | 5.00     |
| NM_026929                                   | Chac1         | ChaC, cation transport regulator-like 1 (E. coli)                                        | 2   | 119,176,992 | 119,180,117 | -288                    | upstream                      | 5.00     |
| NM_026574                                   | Inoc1         | INO80 complex homolog 1 (S. cerevisiae)                                                  | 2   | 119,198,778 | 119,303,365 | 64085                   | in gene                       | 6.00     |
| NM_001042653                                | Oip5          | Opa interacting protein 5                                                                | 2   | 119,435,268 | 119,444,241 | 5169                    | in gene                       | 5.00     |
| NM_001042652,<br>NM_133851                  | Nusap1        | nucleolar and spindle associated protein 1                                               | 2   | 119,444,034 | 119,475,896 | -4962                   | upstream                      | 5.00     |
| NM_019392                                   | Tyro3         | TYRO3 protein tyrosine kinase 3                                                          | 2   | 119,625,250 | 119,643,840 | 19182                   | downstream                    | 6.00     |
| NM_030234                                   | Wdr76         | WD repeat domain 76                                                                      | 2   | 121,332,459 | 121,370,596 | 42485                   | downstream                    | 6.00     |
| NM_172673                                   | Frmd5         | FERM domain containing 5                                                                 | 2   | 121,371,265 | 121,632,793 | 257849, 228089          | in gene, in gene              | 6.00     |
| NM_008545                                   | Mageb3        | melanoma antigen, family B, 3                                                            | 2   | 121,779,507 | 121,781,828 | -188                    | upstream                      | 4.00     |
| NM_212450                                   | Ctdspl2       | CTD (carboxy-terminal domain, RNA polymerase II, polypeptide A) small phosphatase like 2 | 2   | 121,782,189 | 121,839,322 | -173                    | upstream                      | 4.00     |
| NM_026251                                   | 4930424G05Rik | RIKEN cDNA 4930424G05 gene                                                               | 2   | 121,945,844 | 122,011,925 | 34741                   | in gene                       | 5.00     |

| Accession No.                               | Symbol             | Gene Title                                                                              | Chr | Gene Start  | Gene End    | Interval Dists to Start | Interval Pos            | Avg Peak |
|---------------------------------------------|--------------------|-----------------------------------------------------------------------------------------|-----|-------------|-------------|-------------------------|-------------------------|----------|
| NM_009735                                   | B2m                | beta-2 microglobulin                                                                    | 2   | 121,973,423 | 121,978,818 | 3761                    | in gene                 | 5.00     |
| NM_080510                                   | Trim69             | tripartite motif-containing 69                                                          | 2   | 121,986,436 | 122,004,763 | -9252                   | upstream                | 5.00     |
| NM_177610                                   | Duox2              | dual oxidase 2                                                                          | 2   | 122,106,173 | 122,123,901 | -1635                   | upstream                | 5.00     |
| NM_025777                                   | Duoxa2             | dual oxidase maturation factor 2                                                        | 2   | 122,124,636 | 122,128,621 | 900                     | in gene                 | 5.00     |
| NM_145395                                   | Duoxa1             | dual oxidase maturation factor 1                                                        | 2   | 122,129,285 | 122,139,466 | 13930                   | downstream              | 5.00     |
| NM_177608                                   | 3110001I20Rik      | RIKEN cDNA 3110001I20 gene                                                              | 2   | 125,562,722 | 125,608,606 | 174                     | in gene                 | 8.00     |
| NM_009939                                   | Cops2              | COP9 (constitutive photomorphogenic) homolog, subunit 2 ( <i>Arabidopsis thaliana</i> ) | 2   | 125,656,040 | 125,684,754 | 146                     | in gene                 | 7.00     |
| NM_175154                                   | Galk2              | galactokinase 2                                                                         | 2   | 125,684,954 | 125,810,034 | -346                    | upstream                | 7.00     |
| NM_001080944                                | Atp8b4             | ATPase, class I, type 8B, member 4                                                      | 2   | 126,148,481 | 126,200,339 | 2227                    | in gene                 | 6.00     |
| NM_010249,<br>NM_207669                     | Gabpb1             | GA repeat binding protein, beta 1                                                       | 2   | 126,454,649 | 126,501,223 | 743                     | in gene                 | 7.00     |
| NM_001081089                                | A530057A03Rik      | RIKEN cDNA A530057A03 gene                                                              | 2   | 127,250,935 | 127,261,828 | 3017                    | in gene                 | 6.00     |
| NM_029629                                   | Fahd2a             | fumarylacetoacetate hydrolase domain containing 2A                                      | 2   | 127,261,951 | 127,270,241 | 16289                   | downstream              | 6.00     |
| NM_019789                                   | Kcnp3              | Kv channel interacting protein 3, calseinilin                                           | 2   | 127,282,234 | 127,347,106 | 25842, 18194            | in gene, in gene        | 6.50     |
| NM_016902                                   | Nphp1              | neprhonophthysis 1 (juvenile) homolog (human)                                           | 2   | 127,566,468 | 127,614,590 | -3474                   | upstream                | 5.00     |
| XR_035441,<br>XR_035448,<br>XR_035457       | 1500011K16Rik      | RIKEN cDNA 1500011K16 gene                                                              | 2   | 127,618,033 | 127,618,203 | 139                     | in gene                 | 5.00     |
| NM_009772                                   | Bub1               | budding uninhibited by benzimidazoles 1 homolog ( <i>S. cerevisiae</i> )                | 2   | 127,626,857 | 127,657,531 | 39467                   | downstream              | 5.00     |
| NM_028248                                   | Tmem87b            | transmembrane protein 87B                                                               | 2   | 128,644,039 | 128,679,997 | -55                     | upstream                | 8.00     |
| NM_181589                                   | Ckap2l             | cytoskeleton associated protein 2-like                                                  | 2   | 129,094,617 | 129,122,900 | 100                     | in gene                 | 7.00     |
| NM_010554                                   | Il1a               | interleukin 1 alpha                                                                     | 2   | 129,125,346 | 129,135,708 | 12908                   | downstream              | 7.00     |
| NM_029432                                   | 4930402H24Rik      | RIKEN cDNA 4930402H24 gene                                                              | 2   | 130,533,567 | 130,665,846 | 22                      | in gene                 | 7.00     |
| XM_001480201,<br>XM_001480601               | C030014O09Rik      | RIKEN cDNA C030014O09 gene                                                              | 2   | 130,665,924 | 130,666,704 | -100                    | upstream                | 7.00     |
| NM_011045                                   | Pcna               | proliferating cell nuclear antigen                                                      | 2   | 132,075,022 | 132,078,916 | -9788                   | upstream                | 6.00     |
| NM_138651                                   | Cds2               | CDP-diacylglycerol synthase (phosphatidate cytidyltransferase) 2                        | 2   | 132,088,993 | 132,137,777 | -289, 1919              | upstream, in gene       | 6.50     |
| NM_144944                                   | Prokr2             | prokineticin receptor 2                                                                 | 2   | 132,196,901 | 132,211,136 | -48                     | upstream                | 8.00     |
| NM_007694                                   | Chgb               | chromogranin B                                                                          | 2   | 132,607,014 | 132,620,808 | 4463                    | in gene                 | 6.00     |
| NM_001038641,<br>NM_028201,<br>NM_028834    | 2210009G21Rik      | RIKEN cDNA 2210009G21 gene                                                              | 2   | 136,716,954 | 136,895,514 | 136646                  | in gene                 | 5.00     |
| NM_009751                                   | Bfsp1              | beaded filament structural protein in lens-CP94                                         | 2   | 143,652,264 | 143,688,909 | 33837                   | in gene                 | 6.00     |
| NM_019771                                   | Dstn               | destrin                                                                                 | 2   | 143,741,347 | 143,769,060 | -259                    | upstream                | 7.00     |
| XR_035472,<br>XR_035475                     | EG433481           | predicted gene, EG433481                                                                | 2   | 143,999,970 | 144,015,026 | -1918                   | upstream                | 6.00     |
| NM_025314                                   | Dtd1               | D-tyrosyl-tRNA deacylase 1 homolog ( <i>S. cerevisiae</i> )                             | 2   | 144,420,879 | 144,594,457 | 39329                   | in gene                 | 6.00     |
| XM_001481068                                | LOC100043810       | hypothetical protein LOC100043810                                                       | 2   | 145,526,931 | 145,579,408 | 45245                   | in gene                 | 5.00     |
| NM_028724                                   | Rin2               | Ras and Rab interactor 2                                                                | 2   | 145,611,883 | 145,713,349 | 373, 60821              | in gene, in gene        | 5.00     |
| NM_001077632,<br>NM_010919                  | Nkx2-2             | NK2 transcription factor related, locus 2 ( <i>Drosophila</i> )                         | 2   | 147,003,282 | 147,012,138 | 629                     | in gene                 | 5.00     |
| XM_001481082                                | LOC100043816       | hypothetical protein LOC100043816                                                       | 2   | 147,012,118 | 147,019,978 | 8469, -5974             | downstream,<br>upstream | 5.50     |
| NM_009976                                   | Cst3               | cystatin C                                                                              | 2   | 148,697,468 | 148,701,204 | 4756                    | downstream              | 5.00     |
| NM_153781                                   | Pygb               | brain glycogen phosphorylase                                                            | 2   | 150,612,532 | 150,657,484 | -84, 30764              | upstream, in gene       | 5.50     |
| XM_619828,<br>XM_904795                     | Scr2               | scratch homolog 2, zinc finger protein ( <i>Drosophila</i> )                            | 2   | 151,855,292 | 151,921,538 | -44                     | upstream                | 6.00     |
| NM_029688                                   | Srxn1              | sulfiredoxin 1 homolog ( <i>S. cerevisiae</i> )                                         | 2   | 151,931,466 | 151,937,089 | 14966                   | downstream              | 5.00     |
| NM_001037247                                | Defb36             | defensin beta 36                                                                        | 2   | 152,430,109 | 152,438,464 | 15945                   | downstream              | 4.00     |
| NM_001039122                                | OTTMUSG00000015862 | predicted gene, OTTMUSG00000015862                                                      | 2   | 152,448,092 | 152,448,789 | 2735                    | downstream              | 4.00     |
| NM_009047                                   | Rem1               | rad and gem related GTP binding protein 1                                               | 2   | 152,452,744 | 152,460,927 | -6690                   | upstream                | 4.00     |
| XM_001004869,<br>XM_001473601               | 2500004C02Rik      | RIKEN cDNA 2500004C02 gene                                                              | 2   | 153,168,231 | 153,171,809 | 473                     | in gene                 | 5.00     |
| NM_001039939                                | Asx1               | additional sex combs like 1 ( <i>Drosophila</i> )                                       | 2   | 153,171,875 | 153,229,743 | -539                    | upstream                | 5.00     |
| NM_025876                                   | Cdk5rap1           | CDK5 regulatory subunit associated protein 1                                            | 2   | 154,161,122 | 154,198,455 | -5385                   | upstream                | 7.00     |
| NM_009228                                   | Snta1              | syntrophin, acidic 1                                                                    | 2   | 154,202,064 | 154,233,817 | 29977                   | in gene                 | 7.00     |
| NM_023130                                   | Raly               | hnRNP-associated with lethal yellow                                                     | 2   | 154,616,893 | 154,692,980 | -333                    | upstream                | 7.00     |
| NM_015770                                   | a                  | nonagouti                                                                               | 2   | 154,839,306 | 154,876,748 | 19670                   | in gene                 | 6.00     |
| NM_144786                                   | Ggtl3              | gamma-glutamyltransferase-like 3                                                        | 2   | 155,316,121 | 155,340,563 | -3293                   | upstream                | 6.00     |
| NM_019811                                   | Acss2              | acyl-CoA synthetase short-chain family member 2                                         | 2   | 155,343,779 | 155,388,479 | 77                      | in gene                 | 6.00     |
| XM_001481279,<br>XM_001481334               | Myh7b              | myosin, heavy chain 7B, cardiac muscle, beta                                            | 2   | 155,415,661 | 155,460,043 | 52003                   | downstream              | 8.00     |
| NM_018888                                   | 2410003P15Rik      | RIKEN cDNA 2410003P15 gene                                                              | 2   | 155,672,643 | 155,755,784 | 14376                   | in gene                 | 6.00     |
| NM_025516                                   | Ergic3             | ERGIC and golgi 3                                                                       | 2   | 155,833,861 | 155,844,015 | 12627                   | downstream              | 4.00     |
| XM_001481280,<br>XM_001481335               | Fer1l4             | fer-1-like 4 ( <i>C. elegans</i> )                                                      | 2   | 155,845,578 | 155,878,376 | 31888                   | in gene                 | 4.00     |
| NM_172674                                   | Phf20              | PHD finger protein 20                                                                   | 2   | 156,022,383 | 156,135,689 | 107905                  | in gene                 | 5.00     |
| NM_020255                                   | Scand1             | SCAN domain-containing 1                                                                | 2   | 156,137,594 | 156,138,262 | 7974                    | downstream              | 5.00     |
| NM_001042487,<br>NM_001042488,<br>NM_146128 | Dlgap4             | discs, large homolog-associated protein 4 ( <i>Drosophila</i> )                         | 2   | 156,490,531 | 156,590,099 | 22765, 56029            | in gene, in gene        | 6.00     |
| NM_019642                                   | Rpn2               | ribophorin II                                                                           | 2   | 157,104,834 | 157,152,054 | 23774                   | in gene                 | 7.00     |

| Accession No.                                                   | Symbol        | Gene Title                                                                           | Chr | Gene Start  | Gene End    | Interval Dists to Start | Interval Pos                      | Avg Peak |
|-----------------------------------------------------------------|---------------|--------------------------------------------------------------------------------------|-----|-------------|-------------|-------------------------|-----------------------------------|----------|
| NM_001025395,<br>NM_009271                                      | Src           | Rous sarcoma oncogene                                                                | 2   | 157,250,029 | 157,297,574 | -3789                   | upstream                          | 5.00     |
| NM_175692                                                       | A930034L06Rik | RIKEN cDNA A930034L06 gene                                                           | 2   | 158,201,374 | 158,211,881 | 4130                    | in gene                           | 7.00     |
| NM_175419                                                       | Actr5         | ARP5 actin-related protein 5 homolog (yeast)                                         | 2   | 158,450,649 | 158,464,947 | 23559                   | downstream                        | 6.00     |
| NM_177263                                                       | Zhx3          | zinc fingers and homeoboxes 3                                                        | 2   | 160,596,183 | 160,698,726 | -9482                   | upstream                          | 4.00     |
| NM_022883                                                       | Lpin3         | lipin 3                                                                              | 2   | 160,706,469 | 160,731,528 | 1739                    | in gene                           | 4.00     |
| NM_021464                                                       | Ptpn11        | protein tyrosine phosphatase, receptor type, T                                       | 2   | 161,353,359 | 162,486,883 | 1090163                 | in gene                           | 4.00     |
| NM_013731                                                       | Sgk2          | serum/glucocorticoid regulated kinase 2                                              | 2   | 162,813,282 | 162,839,863 | 29518                   | downstream                        | 8.00     |
| NM_172150                                                       | Ift52         | intraflagellar transport 52 homolog (Chlamydomonas)                                  | 2   | 162,843,208 | 162,871,871 | -408, 31384             | upstream,<br>downstream           | 6.50     |
| NM_008652                                                       | Mybl2         | myeloblastosis oncogene-like 2                                                       | 2   | 162,880,371 | 162,910,423 | -5779                   | upstream                          | 5.00     |
| NM_021566                                                       | Jph2          | junctophilin 2                                                                       | 2   | 163,163,509 | 163,223,686 | -1530                   | upstream                          | 5.00     |
| NM_025699                                                       | 3230401D17Rik | RIKEN cDNA 3230401D17 gene                                                           | 2   | 163,231,558 | 163,245,206 | 19990                   | downstream                        | 5.00     |
| NM_013592                                                       | Matn4         | matrilin 4                                                                           | 2   | 164,215,134 | 164,230,660 | 2132                    | in gene                           | 5.00     |
| NM_009036                                                       | Rbpjl         | recombination signal binding protein for immunoglobulin kappa J region-like          | 2   | 164,228,694 | 164,240,948 | -166                    | upstream                          | 5.00     |
| NM_011521                                                       | Sdc4          | syndecan 4                                                                           | 2   | 164,249,747 | 164,268,688 | 15893, 304              | in gene, in gene                  | 5.00     |
| NM_001048227,<br>NM_001048228,<br>NM_001048229,<br>NM_026797    | Dnnd2         | dysbindin (dystrobrevin binding protein 1) domain containing 2                       | 2   | 164,311,640 | 164,318,823 | 11368                   | downstream                        | 6.00     |
| NM_133779                                                       | Pigt          | phosphatidylinositol glycan anchor biosynthesis, class T                             | 2   | 164,323,025 | 164,333,801 | -17                     | upstream                          | 6.00     |
| NM_020333                                                       | Slc12a5       | solute carrier family 12, member 5                                                   | 2   | 164,793,819 | 164,825,231 | 29829                   | in gene                           | 4.00     |
| NM_174988                                                       | Cdh22         | cadherin 22                                                                          | 2   | 164,937,009 | 165,060,219 | 2011                    | in gene                           | 6.00     |
| NM_029021                                                       | 4833422F24Rik | RIKEN cDNA 4833422F24 gene                                                           | 2   | 165,220,950 | 165,225,894 | -3802                   | upstream                          | 5.00     |
| NM_054055                                                       | Slc13a3       | solute carrier family 13 (sodium-dependent dicarboxylate transporter), member 3      | 2   | 165,230,795 | 165,298,697 | 69001                   | downstream                        | 5.00     |
| NM_010165                                                       | Eya2          | eyes absent 2 homolog (Drosophila)                                                   | 2   | 165,480,798 | 165,597,131 | -414                    | upstream                          | 7.00     |
| NM_028072                                                       | Sulf2         | sulfatase 2                                                                          | 2   | 165,898,589 | 165,981,156 | 24900                   | in gene                           | 5.00     |
| XM_130646,<br>XM_911012                                         | Argef2        | ADP-ribosylation factor guanine nucleotide-exchange factor 2 (brefeldin A-inhibited) | 2   | 166,631,064 | 166,723,553 | 16152                   | in gene                           | 4.00     |
| NM_030743                                                       | Zfp313        | zinc finger protein 313                                                              | 2   | 167,318,145 | 167,341,666 | 10783                   | in gene                           | 7.00     |
| NM_009883                                                       | Cebpb         | CCAAT/enhancer binding protein (C/EBP), beta                                         | 2   | 167,514,415 | 167,515,918 | 593                     | in gene                           | 6.00     |
| NM_009628                                                       | Adnp          | activity-dependent neuroprotective protein                                           | 2   | 168,006,465 | 168,032,562 | 1618                    | in gene                           | 5.00     |
| NM_010072                                                       | Dpm1          | dolichol-phosphate (beta-D) mannosyltransferase 1                                    | 2   | 168,034,548 | 168,055,879 | 24935                   | downstream                        | 5.00     |
| NM_001037177,<br>NM_001037178,<br>NM_010899                     | Nfatc2        | nuclear factor of activated T-cells, cytoplasmic, calcineurin-dependent 2            | 2   | 168,301,910 | 168,427,155 | -269                    | upstream                          | 5.00     |
| NM_015731                                                       | Atp9a         | ATPase, class II, type 9A                                                            | 2   | 168,459,938 | 168,567,300 | 49236, 13220            | in gene, in gene                  | 5.50     |
| NM_029815                                                       | Bcas1         | breast carcinoma amplified sequence 1                                                | 2   | 170,172,648 | 170,253,328 | 26224                   | in gene                           | 4.00     |
| NM_008561                                                       | Mc3r          | melanocortin 3 receptor                                                              | 2   | 172,073,992 | 172,076,614 | 8600                    | downstream                        | 4.00     |
| NM_025542                                                       | 2410001C21Rik | RIKEN cDNA 2410001C21 gene                                                           | 2   | 172,266,078 | 172,295,399 | 35858                   | downstream                        | 6.00     |
| XM_130728,<br>XM_913316                                         | 1700029J11Rik | RIKEN cDNA 1700029J11 gene                                                           | 2   | 172,298,028 | 172,299,831 | 3908                    | downstream                        | 6.00     |
| XM_130735,<br>XM_913826                                         | 1700030G11Rik | RIKEN cDNA 1700030G11 gene                                                           | 2   | 173,394,165 | 173,403,842 | -8462                   | upstream                          | 6.00     |
| XM_001481221                                                    | LOC100043911  | hypothetical protein LOC100043911                                                    | 2   | 173,422,634 | 173,434,319 | -4929                   | upstream                          | 7.00     |
| NM_172675                                                       | Stx16         | syntaxin 16                                                                          | 2   | 173,901,822 | 173,923,908 | -158                    | upstream                          | 9.00     |
| NM_001080971                                                    | Tubb1         | tubulin, beta 1                                                                      | 2   | 174,276,196 | 174,283,383 | 13468                   | downstream                        | 6.00     |
| NM_025983                                                       | Atp5e         | ATP synthase, H+ transporting, mitochondrial F1 complex, epsilon subunit             | 2   | 174,286,576 | 174,289,602 | -62                     | upstream                          | 6.00     |
| NM_025531                                                       | Slmo2         | slowmo homolog 2 (Drosophila)                                                        | 2   | 174,290,592 | 174,298,442 | 8778                    | downstream                        | 6.00     |
| NM_001081092                                                    | Taf4a         | TAF4A RNA polymerase II, TATA box binding protein (TBP)-associated factor            | 2   | 179,646,851 | 179,711,351 | 40951, 16583            | in gene, in gene                  | 6.00     |
| NM_025587                                                       | Rps21         | ribosomal protein S21                                                                | 2   | 179,992,084 | 179,993,149 | 524                     | in gene                           | 5.00     |
| NM_145851                                                       | Cables2       | Cdk5 and Abl enzyme substrate 2                                                      | 2   | 179,993,244 | 180,008,170 | 15562                   | downstream                        | 5.00     |
| NM_145760                                                       | Arfgap1       | ADP-ribosylation factor GTPase activating protein 1                                  | 2   | 180,701,974 | 180,717,147 | 18058                   | downstream                        | 6.00     |
| XM_001473208,<br>XM_914804                                      | Col20a1       | collagen, type XX, alpha 1                                                           | 2   | 180,721,240 | 180,751,033 | -1208, 10152            | upstream, in gene                 | 6.00     |
| NM_009133                                                       | Stmn3         | stathmin-like 3                                                                      | 2   | 181,041,164 | 181,049,205 | 277                     | in gene                           | 7.00     |
| NM_001001882                                                    | Rtel1         | regulator of telomere elongation helicase 1                                          | 2   | 181,054,490 | 181,091,321 | -5562                   | upstream                          | 7.00     |
| NM_001048148,<br>NM_144894                                      | Zgpat         | zinc finger, CCCH-type with G patch domain                                           | 2   | 181,099,636 | 181,115,498 | 15996                   | downstream                        | 6.00     |
| NM_023684                                                       | Lime1         | Lck interacting transmembrane adaptor 1                                              | 2   | 181,115,940 | 181,118,333 | -308                    | upstream                          | 6.00     |
| NM_028125                                                       | Btb4          | BTB (POZ) domain containing 4                                                        | 2   | 181,145,255 | 181,194,131 | 29976                   | in gene                           | 4.00     |
| NM_183181                                                       | BC050777      | cDNA sequence BC050777                                                               | 2   | 181,227,915 | 181,229,682 | -9355                   | upstream                          | 6.00     |
| XM_001476491                                                    | LOC100041389  | hypothetical protein LOC100041389                                                    | 3   | 9,053,762   | 9,056,698   | -7762, -2287, 7710      | upstream, upstream,<br>downstream | 4.67     |
| NM_133218                                                       | Zfp704        | zinc finger protein 704                                                              | 3   | 9,427,023   | 9,610,085   | 85429                   | in gene                           | 6.00     |
| XM_910834,<br>XM_975226                                         | EG635702      | predicted gene, EG635702                                                             | 3   | 23,703,838  | 24,682,465  | 52145                   | in gene                           | 5.00     |
| NM_173182                                                       | Fndc3b        | fibronectin type III domain containing 3B                                            | 3   | 27,315,083  | 27,609,299  | 172179                  | in gene                           | 5.00     |
| XM_001473602,<br>XM_001473621,<br>XM_001474897,<br>XM_001474909 | Tnik          | TRAF2 and NCK interacting kinase                                                     | 3   | 28,162,136  | 28,574,776  | 101192                  | in gene                           | 5.00     |



| Accession No.                                             | Symbol        | Gene Title                                                                  | Chr | Gene Start | Gene End   | Interval Dists to Start       | Interval Pos                                   | Avg Peak |
|-----------------------------------------------------------|---------------|-----------------------------------------------------------------------------|-----|------------|------------|-------------------------------|------------------------------------------------|----------|
| NM_001039090,<br>NM_011386                                | Skil          | SKI-like                                                                    | 3   | 30,993,983 | 31,021,499 | 33                            | in gene                                        | 9.00     |
| XM_001475742                                              | LOC100041072  | hypothetical protein LOC100041072                                           | 3   | 33,916,628 | 33,918,801 | -271                          | upstream                                       | 8.00     |
| NM_008053                                                 | Fxr1h         | fragile X mental retardation gene 1,<br>autosomal homolog                   | 3   | 33,919,030 | 33,968,260 | 42                            | in gene                                        | 8.00     |
| XM_896343                                                 | EG621304      | predicted gene, EG621304                                                    | 3   | 50,336,548 | 50,432,305 | 7505                          | in gene                                        | 6.00     |
| NM_023502                                                 | Elf2          | E74-like factor 2                                                           | 3   | 51,059,587 | 51,129,909 | 61429                         | in gene                                        | 7.00     |
| NM_025523                                                 | Ndufc1        | NADH dehydrogenase (ubiquinone) 1,<br>subcomplex unknown, 1                 | 3   | 51,209,401 | 51,212,877 | 349                           | in gene                                        | 8.00     |
| NM_053089                                                 | Narg1         | NMDA receptor-regulated gene 1                                              | 3   | 51,220,051 | 51,277,953 | -7523                         | upstream                                       | 8.00     |
| NM_080793                                                 | Setd7         | SET domain containing (lysine<br>methyltransferase) 7                       | 3   | 51,319,240 | 51,364,745 | 649                           | in gene                                        | 5.00     |
| XM_001473103                                              | LOC100039684  | hypothetical protein LOC100039684                                           | 3   | 51,368,088 | 51,371,039 | -3992                         | upstream                                       | 5.00     |
| NM_174995                                                 | Mgst2         | microsomal glutathione S-transferase 2                                      | 3   | 51,465,115 | 51,486,597 | 869                           | in gene                                        | 6.00     |
| XM_001473484,<br>XM_001478255                             | LOC433587     | similar to mastermind-like 3                                                | 3   | 51,908,052 | 51,909,737 | -10135                        | upstream                                       | 4.00     |
| NM_172862                                                 | Frem2         | Fras1 related extracellular matrix protein 2                                | 3   | 53,317,860 | 53,461,277 | 57965                         | in gene                                        | 5.00     |
| NM_019978                                                 | Dclk1         | doublecortin-like kinase 1                                                  | 3   | 55,046,550 | 55,340,600 | 153802                        | in gene                                        | 4.00     |
| NM_019410                                                 | Pfn2          | profilin 2                                                                  | 3   | 57,645,817 | 57,651,459 | -429                          | upstream                                       | 6.00     |
| NM_001081229                                              | Tsc22d2       | TSC22 domain family 2                                                       | 3   | 58,219,611 | 58,270,709 | 1477                          | in gene                                        | 5.00     |
| NM_032399                                                 | Gpr87         | G protein-coupled receptor 87                                               | 3   | 58,982,845 | 58,984,007 | 9863                          | downstream                                     | 7.00     |
| NM_028808                                                 | P2ry13        | purinergic receptor P2Y, G-protein coupled 13                               | 3   | 59,011,828 | 59,014,804 | 11828                         | downstream                                     | 7.00     |
| NM_015728                                                 | Slc33a1       | solute carrier family 33 (acetyl-CoA<br>transporter), member 1              | 3   | 63,746,258 | 63,768,655 | 1151                          | in gene                                        | 6.00     |
| NM_178892                                                 | Tiparp        | TGFB-inducible poly(ADP-ribose)<br>polymerase                               | 3   | 65,332,369 | 65,359,440 | 19759                         | in gene                                        | 7.00     |
| NM_008351                                                 | Il12a         | interleukin 12a                                                             | 3   | 68,494,566 | 68,502,447 | -3910                         | upstream                                       | 6.00     |
| NM_178726                                                 | Ppm1l         | protein phosphatase 1 (formerly 2C)-like                                    | 3   | 69,120,840 | 69,359,326 | 22792                         | in gene                                        | 6.00     |
| NM_020026                                                 | B3galnt1      | UDP-GalNAc:betaGlcNAc beta 1,3-<br>galactosaminyltransferase, polypeptide 1 | 3   | 69,378,108 | 69,402,783 | 271                           | in gene                                        | 6.00     |
| NM_009250                                                 | Serpini1      | serine (or cysteine) peptidase inhibitor, clade<br>I, member 1              | 3   | 75,361,495 | 75,446,276 | 73049                         | in gene                                        | 7.00     |
| NM_181849                                                 | Fgb           | fibrinogen, B beta polypeptide                                              | 3   | 82,846,225 | 82,853,712 | -5563                         | upstream                                       | 6.00     |
| NM_016784                                                 | Plrg1         | pleiotropic regulator 1, PRL1 homolog<br>(Arabidopsis)                      | 3   | 82,859,460 | 82,876,213 | -185                          | upstream                                       | 6.00     |
| NM_144896                                                 | Pet112l       | PET112-like (yeast)                                                         | 3   | 85,378,051 | 85,458,392 | 27437                         | in gene                                        | 7.00     |
| NM_001032413,<br>NM_001032414,<br>NM_028460,<br>NM_152799 | 3110045G13Rik | RIKEN cDNA 3110045G13 gene                                                  | 3   | 87,553,019 | 87,572,875 | -1173, -7301                  | upstream, upstream                             | 4.50     |
| XM_283871,<br>XM_899803,<br>XM_908571,<br>XM_920908       | Ntrk1         | neurotrophic tyrosine kinase, receptor, type 1                              | 3   | 87,582,166 | 87,599,084 | 25036, 18908, 15372,<br>11772 | downstream,<br>downstream, in gene,<br>in gene | 5.25     |
| NM_011832                                                 | Insrr         | insulin receptor-related receptor                                           | 3   | 87,600,984 | 87,620,023 | 9736                          | in gene                                        | 7.00     |
| NM_001025571,<br>NM_021309                                | Sh2d2a        | SH2 domain protein 2A                                                       | 3   | 87,650,677 | 87,659,644 | 12427, 17483                  | downstream,<br>downstream                      | 7.50     |
| NM_033573                                                 | Prcc          | papillary renal cell carcinoma (translocation-<br>associated)               | 3   | 87,662,836 | 87,689,502 | 26398, 21342                  | in gene, in gene                               | 7.50     |
| NM_008231                                                 | Hdgf          | hepatoma-derived growth factor                                              | 3   | 87,710,288 | 87,720,048 | 352, 15664                    | in gene, downstream                            | 5.50     |
| NM_026591                                                 | Mrp124        | mitochondrial ribosomal protein L24                                         | 3   | 87,723,466 | 87,727,586 | 2486                          | in gene                                        | 5.00     |
| NM_153562                                                 | BC023814      | cDNA sequence BC023814                                                      | 3   | 87,726,827 | 87,734,068 | 8116                          | downstream                                     | 5.00     |
| NM_177663                                                 | Isg20l2       | interferon stimulated exonuclease gene 20-<br>like 2                        | 3   | 87,734,236 | 87,744,608 | -8284                         | upstream                                       | 5.00     |
| NM_133665                                                 | Mef2d         | myocyte enhancer factor 2D                                                  | 3   | 87,946,317 | 87,973,089 | 2291                          | in gene                                        | 8.00     |
| NM_178246                                                 | Smg5          | Smg-5 homolog, nonsense mediated mRNA<br>decay factor (C. elegans)          | 3   | 88,140,182 | 88,166,259 | 23807                         | in gene                                        | 6.00     |
| NM_198410                                                 | Paqr6         | progesterin and adipoQ receptor family member<br>VI                         | 3   | 88,168,511 | 88,172,377 | -4522                         | upstream                                       | 6.00     |
| NM_031368                                                 | Bglap-rs1     | bone gamma-carboxyglutamate protein,<br>related sequence 1                  | 3   | 88,172,542 | 88,173,634 | 9645                          | downstream                                     | 6.00     |
| NM_031248                                                 | Mapbbip       | mitogen activated protein binding protein<br>interacting protein            | 3   | 88,353,741 | 88,356,849 | 8193                          | downstream                                     | 5.00     |
| NM_008487                                                 | Arhgef2       | rho/rac guanine nucleotide exchange factor<br>(GEF) 2                       | 3   | 88,425,060 | 88,450,836 | 2604                          | in gene                                        | 6.00     |
| NM_022994                                                 | Dap3          | death associated protein 3                                                  | 3   | 88,727,363 | 88,754,204 | 8156                          | in gene                                        | 8.00     |
| NM_001077411,<br>NM_008094                                | Gba           | glucosidase, beta, acid                                                     | 3   | 89,006,850 | 89,012,603 | 1822                          | in gene                                        | 6.00     |
| NM_013604                                                 | Mtx1          | metaxin 1                                                                   | 3   | 89,013,011 | 89,017,827 | 9155                          | downstream                                     | 6.00     |
| NM_001039466,<br>NM_183037                                | Trim46        | tripartite motif protein 46                                                 | 3   | 89,038,099 | 89,049,819 | 2155                          | in gene                                        | 4.00     |
| NM_025327                                                 | Krtcap2       | keratinocyte associated protein 2                                           | 3   | 89,050,360 | 89,053,644 | -2696                         | upstream                                       | 4.00     |
| NM_027315                                                 | Ube2q1        | ubiquitin-conjugating enzyme E2c (putative)<br>1                            | 3   | 89,577,538 | 89,587,917 | 9806                          | in gene                                        | 7.00     |
| NM_010559                                                 | Il6ra         | interleukin 6 receptor, alpha                                               | 3   | 89,673,246 | 89,717,084 | 3356, 1788                    | in gene, in gene                               | 6.00     |
| NM_026374                                                 | Ilf2          | interleukin enhancer binding factor 2                                       | 3   | 90,280,123 | 90,292,301 | 14725                         | downstream                                     | 5.00     |
| NM_133854                                                 | Snapap        | SNAP-associated protein                                                     | 3   | 90,291,956 | 90,294,926 | 78                            | in gene                                        | 5.00     |
| NM_023215                                                 | 2500003M10Rik | RIKEN cDNA 2500003M10 gene                                                  | 3   | 90,302,880 | 90,313,365 | 18517                         | downstream                                     | 5.00     |
| NM_026416                                                 | S100a16       | S100 calcium binding protein A16                                            | 3   | 90,345,145 | 90,347,073 | 1239                          | in gene                                        | 6.00     |
| NM_001082484,<br>NM_029721                                | Snx27         | sorting nexin family member 27                                              | 3   | 94,301,466 | 94,386,624 | 1088                          | in gene                                        | 5.00     |

| Accession No.              | Symbol        | Gene Title                                                                      | Chr | Gene Start  | Gene End    | Interval Dists to Start | Interval Pos                | Avg Peak |
|----------------------------|---------------|---------------------------------------------------------------------------------|-----|-------------|-------------|-------------------------|-----------------------------|----------|
| NM_175356                  | Pik4cb        | phosphatidylinositol 4-kinase, catalytic, beta polypeptide                      | 3   | 94,778,658  | 94,810,511  | 30462, 33966            | in gene, downstream         | 5.00     |
| NM_030074                  | Zfp687        | zinc finger protein 687                                                         | 3   | 94,810,624  | 94,819,160  | 10040, 6536             | downstream, in gene         | 5.00     |
| NM_011351                  | Sema6c        | sema domain, transmembrane domain (TM), and cytoplasmic domain, (semaphorin) 6C | 3   | 94,968,296  | 94,977,238  | 10040                   | downstream                  | 5.00     |
| NM_029885, NM_172512       | Gabpb2        | GA repeat binding protein, beta 2                                               | 3   | 94,985,688  | 95,021,864  | 43528                   | downstream                  | 5.00     |
| NM_173347                  | Prune         | prune homolog (Drosophila)                                                      | 3   | 95,057,596  | 95,085,998  | 494, -882, -1330        | in gene, upstream, upstream | 6.67     |
| NM_133858                  | 4930504E06Rik | RIKEN cDNA 4930504E06 gene                                                      | 3   | 95,086,866  | 95,100,083  | -1362, 14, 462          | upstream, in gene, in gene  | 6.67     |
| NM_146133                  | Golph3l       | golgi phosphoprotein 3-like                                                     | 3   | 95,392,881  | 95,423,164  | 36239                   | downstream                  | 6.00     |
| XM_001001572, XM_906073    | EG668457      | predicted gene, EG668457                                                        | 3   | 95,426,151  | 95,426,769  | 2969                    | downstream                  | 6.00     |
| NM_001026212, NM_019561    | Ensa          | endosulfine alpha                                                               | 3   | 95,428,902  | 95,436,039  | 218                     | in gene                     | 6.00     |
| NM_144899                  | Adamts14      | ADAMTS-like 4                                                                   | 3   | 95,480,127  | 95,491,781  | 12325, 10901            | downstream, in gene         | 6.00     |
| NM_153513                  | BC028528      | cDNA sequence BC028528                                                          | 3   | 95,687,889  | 95,695,871  | -1889                   | upstream                    | 7.00     |
| NM_146104                  | Aph1a         | anterior pharynx defective 1a homolog (C. elegans)                              | 3   | 95,697,919  | 95,702,226  | -159                    | upstream                    | 7.00     |
| NM_011797                  | Car14         | carbonic anhydrase 14                                                           | 3   | 95,701,723  | 95,708,562  | 10802                   | downstream                  | 7.00     |
| NM_027241                  | Polr3gl       | polymerase (RNA) III (DNA directed) polypeptide G like                          | 3   | 96,381,797  | 96,398,066  | -6926                   | upstream                    | 8.00     |
| NM_001024851               | Ankrd34       | ankyrin repeat domain 34                                                        | 3   | 96,400,559  | 96,403,701  | 4433                    | downstream                  | 8.00     |
| NM_018812, NM_146135       | Pias3         | protein inhibitor of activated STAT 3                                           | 3   | 96,500,392  | 96,509,885  | 10488                   | downstream                  | 8.00     |
| NM_019800                  | Acp6          | acid phosphatase 6, lysophosphatidic                                            | 3   | 96,962,714  | 96,980,491  | 294                     | in gene                     | 5.00     |
| NM_008256                  | Hmgcs2        | 3-hydroxy-3-methylglutaryl-Coenzyme A synthase 2                                | 3   | 98,084,358  | 98,114,655  | 2682                    | in gene                     | 7.00     |
| NM_207205                  | Igsf3         | immunoglobulin superfamily, member 3                                            | 3   | 101,182,236 | 101,264,792 | 30724                   | in gene                     | 4.00     |
| NM_172295                  | BC037703      | cDNA sequence BC037703                                                          | 3   | 101,616,999 | 101,639,884 | 29596                   | downstream                  | 6.00     |
| XM_001002464, XM_001474615 | Slc22a15      | solute carrier family 22 (organic anion/cation transporter), member 15          | 3   | 101,663,850 | 101,765,317 | 37125                   | in gene                     | 6.00     |
| XM_001479402               | LOC100043047  | similar to CG2839-PA                                                            | 3   | 101,827,526 | 101,857,240 | 34138                   | downstream                  | 6.00     |
| XM_001480691               | LOC100043538  | hypothetical protein LOC100043538                                               | 3   | 103,526,145 | 103,538,152 | -3832                   | upstream                    | 8.00     |
| NM_133859                  | Olfml3        | olfactomedin-like 3                                                             | 3   | 103,539,317 | 103,541,924 | -60                     | upstream                    | 8.00     |
| NM_010432                  | Hipk1         | homeodomain interacting protein kinase 1                                        | 3   | 103,547,594 | 103,595,102 | 53118, -309             | downstream, upstream        | 7.00     |
| XM_001478142, XM_001480843 | A630076J17Rik | RIKEN cDNA A630076J17 gene                                                      | 3   | 107,033,532 | 107,037,641 | 2100                    | in gene                     | 7.00     |
| NM_001044382               | Prok1         | prokineticin 1                                                                  | 3   | 107,038,449 | 107,042,625 | 6993                    | downstream                  | 7.00     |
| NM_172271                  | Slc6a17       | solute carrier family 6 (neurotransmitter transporter), member 17               | 3   | 107,270,466 | 107,320,936 | 45720, 1544             | in gene, in gene            | 6.00     |
| NM_026261                  | Ubl4b         | ubiquitin-like 4B                                                               | 3   | 107,356,616 | 107,357,991 | -5113                   | upstream                    | 5.00     |
| NM_007778                  | Csf1          | colony stimulating factor 1 (macrophage)                                        | 3   | 107,543,978 | 107,563,387 | 18299                   | in gene                     | 8.00     |
| NM_181400                  | Wdr47         | WD repeat domain 47                                                             | 3   | 108,394,335 | 108,448,637 | 61249                   | downstream                  | 6.00     |
| NM_145543                  | Clcc1         | chloride channel CLIC-like 1                                                    | 3   | 108,457,165 | 108,480,930 | -1581                   | upstream                    | 6.00     |
| NM_030699                  | Ntn1          | netrin G1                                                                       | 3   | 109,584,024 | 109,946,146 | 264130                  | in gene                     | 5.00     |
| NM_001080818               | Cdc14a        | CDC14 cell division cycle 14 homolog A (S. cerevisiae)                          | 3   | 115,975,471 | 116,126,950 | 131302                  | in gene                     | 5.00     |
| NM_023245                  | Palmd         | palmdelphin                                                                     | 3   | 116,621,180 | 116,671,870 | 54238                   | downstream                  | 6.00     |
| NM_029655                  | Snx7          | sorting nexin 7                                                                 | 3   | 117,484,796 | 117,571,712 | -32                     | upstream                    | 6.00     |
| NM_145394                  | Slc44a3       | solute carrier family 44, member 3                                              | 3   | 121,162,446 | 121,235,256 | -8                      | upstream                    | 6.00     |
| XR_035399, XR_035470       | 4930432M17Rik | RIKEN cDNA 4930432M17 gene                                                      | 3   | 121,373,681 | 121,385,900 | -7473                   | upstream                    | 6.00     |
| NM_008991                  | Abcd3         | ATP-binding cassette, sub-family D (ALD), member 3                              | 3   | 121,461,828 | 121,518,133 | -123                    | upstream                    | 8.00     |
| NM_013867                  | Bcar3         | breast cancer anti-estrogen resistance 3                                        | 3   | 122,122,745 | 122,233,101 | 42791                   | in gene                     | 5.00     |
| XM_001480111               | LOC100043415  | similar to cyclic nucleotide gated channel beta 1                               | 3   | 129,085,637 | 129,094,127 | -7537                   | upstream                    | 5.00     |
| XR_034265, XR_034544       | LOC435755     | POU domain, class 5, transcription factor 1-like                                | 3   | 129,129,764 | 129,137,633 | 7015                    | in gene                     | 4.00     |
| NM_130450                  | Elov16        | ELOVL family member 6, elongation of long chain fatty acids (yeast)             | 3   | 129,235,304 | 129,341,413 | 696, 84824              | in gene, in gene            | 6.00     |
| NM_008212                  | Hadh          | hydroxyacyl-Coenzyme A dehydrogenase                                            | 3   | 130,936,342 | 130,974,955 | 16395                   | in gene                     | 7.00     |
| NM_028943                  | Sgms2         | sphingomyelin synthase 2                                                        | 3   | 131,025,656 | 131,047,853 | 24157                   | downstream                  | 5.00     |
| NM_146141                  | Ppa2          | pyrophosphatase (inorganic) 2                                                   | 3   | 132,973,080 | 133,041,033 | 24                      | in gene                     | 5.00     |
| NM_001040400               | E130014J05Rik | RIKEN cDNA E130014J05 gene                                                      | 3   | 133,126,803 | 133,207,332 | 1124                    | in gene                     | 5.00     |
| XM_884831, XM_915250       | EG620439      | predicted gene, EG620439                                                        | 3   | 134,871,948 | 134,872,142 | 3476                    | downstream                  | 7.00     |
| NM_173762                  | Cenpe         | centromere protein E                                                            | 3   | 134,875,527 | 134,936,504 | -103                    | upstream                    | 7.00     |
| NM_025356                  | Ube2d3        | ubiquitin-conjugating enzyme E2D 3 (UBC4/5 homolog, yeast)                      | 3   | 135,101,723 | 135,130,142 | 53                      | in gene                     | 4.00     |
| NM_008913                  | Ppp3ca        | protein phosphatase 3, catalytic subunit, alpha isoform                         | 3   | 136,333,734 | 136,598,743 | 22522, 120826           | in gene, in gene            | 5.00     |
| NM_177665                  | EG229862      | predicted gene, EG229862                                                        | 3   | 137,213,009 | 137,215,586 | 4914                    | downstream                  | 15.00    |
| NM_019571                  | Tspan5        | tetraspanin 5                                                                   | 3   | 138,405,159 | 138,567,388 | 91193                   | in gene                     | 6.00     |
| XM_001473646, XM_001479910 | LOC620771     | similar to ribosomal protein L21                                                | 3   | 138,482,900 | 138,492,163 | -4189                   | upstream                    | 6.00     |

| Accession No.                                                                 | Symbol        | Gene Title                                                                                                    | Chr | Gene Start  | Gene End    | Interval Dists to Start | Interval Pos      | Avg Peak |
|-------------------------------------------------------------------------------|---------------|---------------------------------------------------------------------------------------------------------------|-----|-------------|-------------|-------------------------|-------------------|----------|
| NM_001040690,<br>NM_145544                                                    | Rap1gds1      | RAP1, GTP-GDP dissociation stimulator 1                                                                       | 3   | 138,588,870 | 138,738,163 | -317                    | upstream          | 6.00     |
| NM_198659                                                                     | B930007M17Rik | RIKEN cDNA B930007M17 gene                                                                                    | 3   | 138,868,857 | 139,373,263 | 107900                  | in gene           | 5.00     |
| NM_153564                                                                     | Gbp5          | guanylate nucleotide binding protein 5                                                                        | 3   | 142,159,898 | 142,185,308 | 33366                   | downstream        | 6.00     |
| NM_001083312,<br>NM_145545                                                    | Gbp6          | guanylate binding protein 6                                                                                   | 3   | 142,193,302 | 142,213,047 | -38                     | upstream          | 6.00     |
| NM_010260                                                                     | Gbp2          | guanylate nucleotide binding protein 2                                                                        | 3   | 142,283,627 | 142,300,972 | 16997                   | in gene           | 5.00     |
| NM_019464                                                                     | Sh3glb1       | SH3-domain GRB2-like B1 (endophilin)                                                                          | 3   | 144,351,808 | 144,383,287 | 647                     | in gene           | 5.00     |
| NM_010516                                                                     | Cyr61         | cysteine rich protein 61                                                                                      | 3   | 145,309,940 | 145,312,945 | 2241                    | in gene           | 6.00     |
| NM_027617                                                                     | Spata1        | spermatogenesis associated 1                                                                                  | 3   | 146,120,167 | 146,162,717 | 205                     | in gene           | 8.00     |
| NM_010318                                                                     | Gng5          | guanine nucleotide binding protein (G protein), gamma 5 subunit                                               | 3   | 146,162,800 | 146,168,507 | -288                    | upstream          | 8.00     |
| NM_027332,<br>NM_027371                                                       | Bxdc5         | brix domain containing 5                                                                                      | 3   | 146,169,382 | 146,184,382 | 21870                   | downstream        | 8.00     |
| XM_001474558                                                                  | LOC100040368  | similar to CG33791-PB                                                                                         | 3   | 148,649,507 | 148,666,995 | 1389, 2973              | in gene, in gene  | 6.00     |
| NM_008966                                                                     | Ptgfr         | prostaglandin F receptor                                                                                      | 3   | 151,461,574 | 151,500,492 | -7444                   | upstream          | 5.00     |
| NM_025926,<br>NM_027287                                                       | Dnajb4        | DnaJ (Hsp40) homolog, subfamily B, member 4                                                                   | 3   | 151,847,060 | 151,873,047 | -201                    | upstream          | 7.00     |
| NM_057172                                                                     | Fubp1         | far upstream element (FUSE) binding protein 1                                                                 | 3   | 151,873,422 | 151,899,794 | -174                    | upstream          | 7.00     |
| NM_012028                                                                     | St6galnac5    | ST6 (alpha-N-acetyl-neuraminyl-2,3-beta-galactosyl-1,3)-N-acetylgalactosaminide alpha-2,6-sialyltransferase 5 | 3   | 152,482,850 | 152,645,174 | 169350                  | downstream        | 7.00     |
| NM_007382                                                                     | Acadm         | acyl-Coenzyme A dehydrogenase, medium chain                                                                   | 3   | 153,585,323 | 153,607,396 | -460                    | upstream          | 6.00     |
| NM_017381                                                                     | Zranb2        | zinc finger, RAN-binding domain containing 2                                                                  | 3   | 157,197,361 | 157,211,303 | -257                    | upstream          | 7.00     |
|                                                                               | Mirrn186      | microRNA 186                                                                                                  | 3   | 157,207,242 | 157,207,312 | -10138                  | upstream          | 7.00     |
| NM_001081358                                                                  | Lrrc7         | leucine rich repeat containing 7                                                                              | 3   | 157,747,403 | 158,225,185 | 400321                  | in gene           | 5.00     |
| NM_001081183                                                                  | 1110037F02Rik | RIKEN cDNA 1110037F02 gene                                                                                    | 4   | 11,413,105  | 11,478,290  | 18927                   | in gene           | 5.00     |
| NM_001033453                                                                  | Ppm2c         | protein phosphatase 2C, magnesium dependent, catalytic subunit                                                | 4   | 11,886,958  | 11,893,567  | -33                     | upstream          | 5.00     |
| NM_009822                                                                     | Runx1t1       | runt-related transcription factor 1; translocated to, 1 (cyclin D-related)                                    | 4   | 13,711,929  | 13,818,264  | 48295                   | in gene           | 6.00     |
| NM_172988                                                                     | Fbxl4         | F-box and leucine-rich repeat protein 4                                                                       | 4   | 22,284,712  | 22,361,193  | 19544                   | in gene           | 5.00     |
| NM_030733                                                                     | Gpr63         | G protein-coupled receptor 63                                                                                 | 4   | 24,900,566  | 24,936,380  | 23509                   | in gene           | 6.00     |
| NM_001012450,<br>NM_001012451,<br>NM_080471                                   | Ankrd6        | ankyrin repeat domain 6                                                                                       | 4   | 32,891,010  | 33,037,801  | 122745, 86169           | in gene, in gene  | 6.00     |
| NM_001033225                                                                  | Pnrc1         | proline-rich nuclear receptor coactivator 1                                                                   | 4   | 33,332,398  | 33,335,762  | 290                     | in gene           | 8.00     |
| NM_011884                                                                     | Rngtt         | RNA guanylyltransferase and 5'-phosphatase                                                                    | 4   | 33,397,286  | 33,589,585  | 72954                   | in gene           | 7.00     |
| NM_027041                                                                     | 1700003M02Rik | RIKEN cDNA 1700003M02 gene                                                                                    | 4   | 34,658,581  | 34,677,427  | -3581                   | upstream          | 5.00     |
| NM_001033255                                                                  | Gm136         | gene model 136, (NCBI)                                                                                        | 4   | 34,691,037  | 34,703,508  | 22500                   | downstream        | 5.00     |
| NM_178061                                                                     | Mobkl2b       | MOB1, Mps One Binder kinase activator-like 2B (yeast)                                                         | 4   | 34,899,953  | 35,104,715  | 88491                   | in gene           | 9.00     |
| NM_007386                                                                     | Aco1          | aconitase 1                                                                                                   | 4   | 40,090,298  | 40,146,042  | 102                     | in gene           | 6.00     |
| NM_172689                                                                     | Ddx58         | DEAD (Asp-Glu-Ala-Asp) box polypeptide 58                                                                     | 4   | 40,152,823  | 40,186,734  | -2514                   | upstream          | 6.00     |
| NM_001025444,<br>NM_025545                                                    | Aptx          | aprataxin                                                                                                     | 4   | 40,629,111  | 40,650,220  | -196                    | upstream          | 8.00     |
| NM_024241                                                                     | Kif24         | kinesin family member 24                                                                                      | 4   | 41,337,781  | 41,411,873  | -5034                   | upstream          | 5.00     |
| NM_025539                                                                     | Nudt2         | nudix (nucleoside diphosphate linked moiety X)-type motif 2                                                   | 4   | 41,412,181  | 41,427,959  | 4726                    | in gene           | 5.00     |
| NM_173788                                                                     | Npr2          | natriuretic peptide receptor 2                                                                                | 4   | 43,644,807  | 43,664,116  | 11129                   | in gene           | 4.00     |
| NM_001007463                                                                  | Spag8         | sperm associated antigen 8                                                                                    | 4   | 43,664,601  | 43,666,424  | 10488                   | downstream        | 4.00     |
| NM_015828                                                                     | Gne           | glucosamine                                                                                                   | 4   | 44,049,698  | 44,097,038  | 11422                   | in gene           | 5.00     |
| XM_001474487                                                                  | LOC100040313  | hypothetical protein LOC100040313                                                                             | 4   | 44,105,508  | 44,119,716  | 4268                    | in gene           | 6.00     |
| NM_153167                                                                     | Wdr32         | WD repeat domain 32                                                                                           | 4   | 45,354,973  | 45,392,594  | -77                     | upstream          | 7.00     |
| NM_028788                                                                     | 1300002K09Rik | RIKEN cDNA 1300002K09 gene                                                                                    | 4   | 45,861,832  | 45,899,876  | -8                      | upstream          | 6.00     |
| NM_198664                                                                     | Tbc1d2        | TBC1 domain family, member 2                                                                                  | 4   | 46,617,262  | 46,663,071  | 49775                   | downstream        | 5.00     |
| NM_009928                                                                     | Col15a1       | procollagen, type XV                                                                                          | 4   | 47,220,884  | 47,326,037  | 19980                   | in gene           | 7.00     |
| NM_172304                                                                     | Tex10         | testis expressed gene 10                                                                                      | 4   | 48,443,828  | 48,486,294  | -218                    | upstream          | 5.00     |
| NM_028137                                                                     | 5730528L13Rik | RIKEN cDNA 5730528L13 gene                                                                                    | 4   | 48,553,371  | 48,574,791  | -347                    | upstream          | 4.00     |
| NM_182999                                                                     | Rnf20         | ring finger protein 20                                                                                        | 4   | 49,644,993  | 49,669,758  | -17                     | upstream          | 5.00     |
| XM_001476161,<br>XM_001476174,<br>XM_980440                                   | Epb4.114b     | erythrocyte protein band 4.1-like 4b                                                                          | 4   | 57,008,606  | 57,156,520  | 132856                  | in gene           | 5.00     |
| NM_011207                                                                     | Ptpn3         | protein tyrosine phosphatase, non-receptor type 3                                                             | 4   | 57,252,396  | 57,313,215  | 59775, -1217            | in gene, upstream | 4.50     |
| NM_172868                                                                     | Palm2         | paralemmin 2                                                                                                  | 4   | 57,581,154  | 57,730,017  | 121438                  | in gene           | 5.00     |
| NM_001037127,<br>NM_001037128,<br>NM_001037129,<br>NM_001037130,<br>NM_010944 | Musk          | muscle, skeletal, receptor tyrosine kinase                                                                    | 4   | 58,298,834  | 58,387,175  | 78                      | in gene           | 6.00     |
| XM_909547,<br>XM_988632                                                       | LOC634731     | similar to sushi domain containing 1                                                                          | 4   | 59,327,957  | 59,451,499  | 39467                   | in gene           | 5.00     |
| NM_024255                                                                     | Hsd12         | hydroxysteroid dehydrogenase like 2                                                                           | 4   | 59,594,463  | 59,631,566  | 44193                   | downstream        | 5.00     |
| NM_001015681,<br>NM_153158                                                    | E130308A19Rik | RIKEN cDNA E130308A19 gene                                                                                    | 4   | 59,639,199  | 59,767,175  | -543                    | upstream          | 5.00     |
| NM_023597                                                                     | Wdr31         | WD repeat domain 31                                                                                           | 4   | 62,114,768  | 62,131,906  | 15810                   | in gene           | 4.00     |
| NM_008525                                                                     | Alad          | aminolevulinate, delta-, dehydratase                                                                          | 4   | 62,170,204  | 62,181,097  | -87                     | upstream          | 6.00     |

| Accession No.                                                                                                                                     | Symbol        | Gene Title                                                                                           | Chr | Gene Start  | Gene End    | Interval Dists to Start | Interval Pos                  | Avg Peak |
|---------------------------------------------------------------------------------------------------------------------------------------------------|---------------|------------------------------------------------------------------------------------------------------|-----|-------------|-------------|-------------------------|-------------------------------|----------|
| NM_021498                                                                                                                                         | Pole3         | polymerase (DNA directed), epsilon 3 (p17 subunit)                                                   | 4   | 62,184,832  | 62,186,048  | 4864                    | downstream                    | 6.00     |
| NM_177607                                                                                                                                         | 493343017Rik  | RIKEN cDNA 493343017 gene                                                                            | 4   | 62,186,403  | 62,209,027  | -5219                   | upstream                      | 6.00     |
| NM_001081650,<br>NM_019492,<br>NM_134257                                                                                                          | Rgs3          | regulator of G-protein signaling 3                                                                   | 4   | 62,220,881  | 62,363,369  | 71199, 83706            | in gene, in gene              | 6.00     |
| NM_025685                                                                                                                                         | Col27a1       | procollagen, type XXVII, alpha 1                                                                     | 4   | 62,876,446  | 62,996,025  | 32770                   | in gene                       | 6.00     |
|                                                                                                                                                   | Mirn455       | microRNA 455                                                                                         | 4   | 62,917,884  | 62,917,965  | -8668                   | upstream                      | 6.00     |
| NM_008768                                                                                                                                         | Orm1          | orosomuroid 1                                                                                        | 4   | 63,005,600  | 63,009,196  | 6304                    | downstream                    | 6.00     |
| NM_013623                                                                                                                                         | Orm3          | orosomuroid 3                                                                                        | 4   | 63,017,196  | 63,020,545  | -5292                   | upstream                      | 6.00     |
| NM_001045514                                                                                                                                      | Akna          | AT-hook transcription factor                                                                         | 4   | 63,028,159  | 63,064,388  | -6636                   | upstream                      | 5.00     |
| NM_001008791,<br>NM_001008792,<br>NM_001008793,<br>NM_001008794,<br>NM_001008795,<br>NM_001008796,<br>NM_001008797,<br>NM_001008798,<br>NM_028640 | Whrn          | whirlin                                                                                              | 4   | 63,075,944  | 63,156,985  | 85961, 34009            | downstream, in gene           | 5.50     |
| NM_172869                                                                                                                                         | Frmf3         | FERM domain containing 3                                                                             | 4   | 73,659,565  | 73,835,832  | 149811                  | in gene                       | 6.00     |
| NM_144787                                                                                                                                         | Jmjd2c        | jumonji domain containing 2C                                                                         | 4   | 73,897,852  | 74,051,765  | -7                      | upstream                      | 5.00     |
| NM_027238                                                                                                                                         | 1810054D07Rik | RIKEN cDNA 1810054D07 gene                                                                           | 4   | 82,866,205  | 82,970,093  | 525                     | in gene                       | 5.00     |
| XM_001472567                                                                                                                                      | LOC100039265  | hypothetical protein LOC100039265                                                                    | 4   | 94,698,054  | 94,716,038  | -3322                   | upstream                      | 8.00     |
| NM_010591                                                                                                                                         | Jun           | Jun oncogene                                                                                         | 4   | 94,715,746  | 94,718,878  | -482                    | upstream                      | 8.00     |
| NM_001033773                                                                                                                                      | Ube2u         | ubiquitin-conjugating enzyme E2U (putative)                                                          | 4   | 100,151,472 | 100,222,750 | 48960                   | in gene                       | 6.00     |
| NM_183024                                                                                                                                         | Raver2        | ribonucleoprotein, PTB-binding 2                                                                     | 4   | 100,741,643 | 100,824,975 | 15701                   | in gene                       | 6.00     |
| NM_146145                                                                                                                                         | Jak1          | Janus kinase 1                                                                                       | 4   | 100,824,579 | 100,937,887 | 77599, -33              | in gene, upstream             | 5.50     |
| NM_198412                                                                                                                                         | Dnajc6        | DnaJ (Hsp40) homolog, subfamily C, member 6                                                          | 4   | 101,223,199 | 101,315,404 | 96945                   | downstream                    | 8.00     |
| NM_175036                                                                                                                                         | Leprot        | leptin receptor overlapping transcript                                                               | 4   | 101,320,388 | 101,331,963 | -244                    | upstream                      | 8.00     |
| NM_146254                                                                                                                                         | Wdr78         | WD repeat domain 78                                                                                  | 4   | 102,710,674 | 102,786,904 | -5080                   | upstream                      | 6.00     |
| NM_001039081,<br>NM_027696                                                                                                                        | Mier1         | mesoderm induction early response 1 homolog (Xenopus laevis)                                         | 4   | 102,787,070 | 102,838,354 | 4914                    | in gene                       | 6.00     |
| NM_177732                                                                                                                                         | Slc35d1       | solute carrier family 35 (UDP-glucuronic acid/UDP-N-acetylgalactosamine dual transporter), member D1 | 4   | 102,844,323 | 102,887,489 | 11313                   | in gene                       | 7.00     |
| NM_178143                                                                                                                                         | Prkaa2        | protein kinase, AMP-activated, alpha 2 catalytic subunit                                             | 4   | 104,707,595 | 104,782,474 | 490                     | in gene                       | 7.00     |
| NM_080555                                                                                                                                         | Ppap2b        | phosphatidic acid phosphatase type 2B                                                                | 4   | 104,829,952 | 104,905,372 | 71520                   | in gene                       | 5.00     |
| NM_025617                                                                                                                                         | 2210012G02Rik | RIKEN cDNA 2210012G02 gene                                                                           | 4   | 106,806,767 | 106,850,971 | -133                    | upstream                      | 8.00     |
| NM_029565                                                                                                                                         | Tmem59        | transmembrane protein 59                                                                             | 4   | 106,851,297 | 106,873,592 | -193                    | upstream                      | 8.00     |
| NM_147221                                                                                                                                         | Glis1         | GLIS family zinc finger 1                                                                            | 4   | 107,107,324 | 107,307,664 | 23204                   | in gene                       | 6.00     |
| NM_146255                                                                                                                                         | Slc1a7        | solute carrier family 1 (glutamate transporter), member 7                                            | 4   | 107,640,937 | 107,686,134 | 7879, 30690             | in gene, in gene              | 5.00     |
| NM_175472                                                                                                                                         | Zcchc11       | zinc finger, CCHC domain containing 11                                                               | 4   | 108,132,031 | 108,232,020 | 14065                   | in gene                       | 7.00     |
| XM_001474862,<br>XM_916360                                                                                                                        | LOC639774     | similar to Butyrophilin-like protein 2 precursor (BTL-II)                                            | 4   | 111,591,997 | 111,612,262 | 18915                   | in gene                       | 5.00     |
| XM_981216                                                                                                                                         | LOC666048     | similar to C05G5.5                                                                                   | 4   | 114,079,293 | 114,283,345 | 35379, 110467, 115891   | in gene, in gene, in gene     | 6.33     |
| NM_025647                                                                                                                                         | Cmpk          | cytidylate kinase                                                                                    | 4   | 114,633,243 | 114,659,749 | 293, -155               | in gene, upstream             | 6.50     |
| NM_028142                                                                                                                                         | Nsun4         | NOL1/NOP2/Sun domain family, member 4                                                                | 4   | 115,705,447 | 115,726,481 | 1905                    | in gene                       | 5.00     |
| XM_905120                                                                                                                                         | LOC433748     | similar to C49H3.3                                                                                   | 4   | 115,872,863 | 115,873,610 | 8282                    | downstream                    | 5.00     |
| NM_181585                                                                                                                                         | Pik3r3        | phosphatidylinositol 3 kinase, regulatory subunit, polypeptide 3 (p55)                               | 4   | 115,894,519 | 115,975,661 | 15550                   | in gene                       | 4.00     |
| NM_008958                                                                                                                                         | Ptch2         | patched homolog 2                                                                                    | 4   | 116,768,961 | 116,787,436 | 8959                    | in gene                       | 5.00     |
| XR_035186,<br>XR_035205,<br>XR_035280                                                                                                             | 9530048O09Rik | RIKEN cDNA 9530048O09 gene                                                                           | 4   | 116,792,467 | 116,797,186 | -5262                   | upstream                      | 7.00     |
| XM_001477060                                                                                                                                      | LOC100041324  | hypothetical protein LOC100041324                                                                    | 4   | 116,797,227 | 116,798,330 | -4118                   | upstream                      | 7.00     |
| NM_175030                                                                                                                                         | 4833401D15Rik | RIKEN cDNA 4833401D15 gene                                                                           | 4   | 116,799,418 | 116,801,335 | 3030                    | downstream                    | 7.00     |
| NM_013807                                                                                                                                         | Plk3          | polo-like kinase 3 (Drosophila)                                                                      | 4   | 116,801,260 | 116,806,557 | 4109                    | in gene                       | 7.00     |
| NM_008135                                                                                                                                         | Slc6a9        | solute carrier family 6 (neurotransmitter transporter, glycine), member 9                            | 4   | 117,507,863 | 117,541,910 | 3833                    | in gene                       | 6.00     |
| NM_146152                                                                                                                                         | Ipo13         | importin 13                                                                                          | 4   | 117,567,098 | 117,587,604 | 1236                    | in gene                       | 5.00     |
| NM_011213                                                                                                                                         | Ptprf         | protein tyrosine phosphatase, receptor type, F                                                       | 4   | 117,880,818 | 117,964,002 | 81058                   | in gene                       | 6.00     |
| NM_001004178                                                                                                                                      | AA415398      | expressed sequence AA415398                                                                          | 4   | 119,202,913 | 119,211,374 | -530                    | upstream                      | 6.00     |
| NM_172699                                                                                                                                         | Foxj3         | forkhead box J3                                                                                      | 4   | 119,212,293 | 119,301,724 | -389, 29766, 97771      | upstream, in gene, downstream | 5.67     |
| NM_008190                                                                                                                                         | Guca2a        | guanylate cyclase activator 2a (guanylin)                                                            | 4   | 119,310,337 | 119,312,070 | -273                    | upstream                      | 5.00     |
| NM_013883                                                                                                                                         | Scmh1         | sex comb on midleg homolog 1                                                                         | 4   | 120,119,636 | 120,202,560 | 81164                   | in gene                       | 6.00     |
| NM_177570                                                                                                                                         | Slnf1         | schlafen like 1                                                                                      | 4   | 120,204,836 | 120,209,266 | -4036                   | upstream                      | 6.00     |
| NM_001048168,<br>NM_008692                                                                                                                        | Nfyc          | nuclear transcription factor-Y gamma                                                                 | 4   | 120,430,040 | 120,498,320 | 384                     | in gene                       | 5.00     |
| NM_025873                                                                                                                                         | Trit1         | tRNA isopentenyltransferase 1                                                                        | 4   | 122,693,840 | 122,732,177 | -336                    | upstream                      | 4.00     |
| XM_112246,<br>XM_907862                                                                                                                           | Nt5c1a        | 5'-nucleotidase, cytosolic IA                                                                        | 4   | 122,878,801 | 122,893,450 | 24719                   | downstream                    | 12.00    |
| XM_001472625                                                                                                                                      | LOC100039298  | similar to cyclic nucleotide gated channel beta 1                                                    | 4   | 125,042,926 | 125,168,013 | 87954                   | in gene                       | 6.00     |
| NM_172701                                                                                                                                         | 1810007P19Rik | RIKEN cDNA 1810007P19 gene                                                                           | 4   | 125,735,809 | 125,766,578 | 38063                   | downstream                    | 7.00     |

| Accession No.                               | Symbol        | Gene Title                                                                | Chr | Gene Start  | Gene End    | Interval Dists to Start | Interval Pos            | Avg Peak |
|---------------------------------------------|---------------|---------------------------------------------------------------------------|-----|-------------|-------------|-------------------------|-------------------------|----------|
| NM_138721                                   | Lsm10         | U7 snRNP-specific Sm-like protein LSM10                                   | 4   | 125,773,996 | 125,775,824 | -124                    | upstream                | 7.00     |
| NM_028800                                   | Stk40         | serine/threonine kinase 40                                                | 4   | 125,781,242 | 125,818,126 | -7370, 43622            | upstream,<br>downstream | 7.00     |
| NM_172145                                   | 2610027C15Rik | RIKEN cDNA 2610027C15 gene                                                | 4   | 125,825,247 | 125,827,118 | -383                    | upstream                | 7.00     |
| NM_011970                                   | Psmb2         | proteasome (prosome, macropain) subunit, beta type 2                      | 4   | 126,354,910 | 126,386,950 | -1342                   | upstream                | 5.00     |
| NM_011986                                   | Ncdn          | neurochondrin                                                             | 4   | 126,420,999 | 126,430,603 | -341                    | upstream                | 6.00     |
| NM_001035525,<br>NM_001035526,<br>NM_133886 | AU040320      | expressed sequence AU040320                                               | 4   | 126,430,799 | 126,546,938 | 145                     | in gene                 | 6.00     |
| NM_026670                                   | Zmym1         | zinc finger, MYM domain containing 1                                      | 4   | 126,724,338 | 126,738,376 | 15944                   | downstream              | 5.00     |
| NM_205823                                   | Tlr12         | tol-like receptor 12                                                      | 4   | 128,292,891 | 128,295,733 | 8373, -139              | downstream,<br>upstream | 5.50     |
| NM_018774                                   | Phc2          | polyhomeotic-like 2 (Drosophila)                                          | 4   | 128,382,240 | 128,430,118 | 42160                   | in gene                 | 5.00     |
| NM_001009819                                | A3galt2       | alpha 1,3-galactosyltransferase 2 (isoglobotriaosylceramide synthase)     | 4   | 128,436,502 | 128,446,542 | 18250                   | downstream              | 7.00     |
| NM_001081098                                | BC039093      | cDNA sequence BC039093                                                    | 4   | 128,450,329 | 128,483,356 | 28604                   | in gene                 | 7.00     |
| NM_172875                                   | Adc           | arginine decarboxylase                                                    | 4   | 128,609,390 | 128,639,661 | 317                     | in gene                 | 4.00     |
| NM_025452                                   | Tmem54        | transmembrane protein 54                                                  | 4   | 128,782,860 | 128,788,829 | 15460                   | downstream              | 8.00     |
| NM_010471                                   | Hpc           | hippocalcin                                                               | 4   | 128,788,819 | 128,796,002 | -2318                   | upstream                | 8.00     |
| NM_029036                                   | S100pbp       | S100P binding protein                                                     | 4   | 128,828,069 | 128,866,726 | -474                    | upstream                | 7.00     |
| NM_134151                                   | Yars          | tyrosyl-tRNA synthetase                                                   | 4   | 128,867,195 | 128,896,851 | 5                       | in gene                 | 7.00     |
| NM_028603                                   | 2410081M15Rik | RIKEN cDNA 2410081M15 gene                                                | 4   | 129,030,876 | 129,055,272 | 872                     | in gene                 | 7.00     |
| NM_010693                                   | Lck           | lymphocyte protein tyrosine kinase                                        | 4   | 129,225,602 | 129,235,616 | -10048                  | upstream                | 5.00     |
| NM_182783                                   | BC030183      | cDNA sequence BC030183                                                    | 4   | 129,254,112 | 129,255,791 | 10127                   | downstream              | 5.00     |
| NM_173071                                   | Bai2          | brain-specific angiogenesis inhibitor 2                                   | 4   | 129,669,312 | 129,699,592 | -32                     | upstream                | 5.00     |
| NM_010174                                   | Fabp3         | fatty acid binding protein 3, muscle and heart                            | 4   | 129,986,022 | 129,992,707 | 7663                    | downstream              | 6.00     |
| NM_153160                                   | Zcchc17       | zinc finger, CCHC domain containing 17                                    | 4   | 129,993,145 | 130,037,192 | 43507                   | in gene                 | 6.00     |
| NM_030722                                   | Pum1          | pumilio 1 (Drosophila)                                                    | 4   | 130,219,304 | 130,337,187 | 90360                   | in gene                 | 7.00     |
| NM_025297                                   | Mecr          | mitochondrial trans-2-enoyl-CoA reductase                                 | 4   | 131,399,386 | 131,423,682 | -6154                   | upstream                | 6.00     |
| NM_020273                                   | Gmeb1         | glucocorticoid modulatory element binding protein 1                       | 4   | 131,780,934 | 131,807,767 | 32439                   | downstream              | 8.00     |
| NM_025579                                   | Taf12         | TAF12 RNA polymerase II, TATA box binding protein (TBP)-associated factor | 4   | 131,830,328 | 131,849,242 | 20888                   | downstream              | 5.00     |
| NM_175306                                   | Phactr4       | phosphatase and actin regulator 4                                         | 4   | 131,911,893 | 131,978,322 | 18                      | in gene                 | 6.00     |
| NM_145553                                   | BC008163      | cDNA sequence BC008163                                                    | 4   | 132,456,533 | 132,478,426 | 74                      | in gene                 | 6.00     |
| NM_153423                                   | Wasf2         | WAS protein family, member 2                                              | 4   | 132,686,548 | 132,754,245 | 69791                   | downstream              | 5.00     |
| NM_008154                                   | Gpr3          | G-protein coupled receptor 3                                              | 4   | 132,765,255 | 132,768,422 | 12083                   | downstream              | 5.00     |
| XM_001477989                                | LOC100042018  | hypothetical protein LOC100042018                                         | 4   | 132,848,123 | 132,850,128 | 1168                    | in gene                 | 5.00     |
| NM_199306                                   | Wdtdc1        | WD and tetrapeptide repeats 1                                             | 4   | 132,848,381 | 132,895,020 | 45729                   | in gene                 | 5.00     |
| NM_172876                                   | Gpatch3       | G patch domain containing 3                                               | 4   | 133,130,660 | 133,140,157 | -4                      | upstream                | 10.00    |
| NM_133884                                   | Atpbd1b       | ATP binding domain 1 family, member B                                     | 4   | 133,140,295 | 133,147,649 | -9639                   | upstream                | 10.00    |
| NM_001080819                                | Arid1a        | AT rich interactive domain 1A (Swi1 like)                                 | 4   | 133,234,923 | 133,309,526 | -3434                   | upstream                | 8.00     |
| NM_027995                                   | Paqr7         | progesterone and adiponectin receptor family member VII                   | 4   | 134,052,893 | 134,064,725 | -368                    | upstream                | 5.00     |
| NM_029100                                   | Sepr1         | selenoprotein N, 1                                                        | 4   | 134,093,807 | 134,108,081 | -7343                   | upstream                | 7.00     |
| NM_207237                                   | Man1c1        | mannosidase, alpha, class 1C, member 1                                    | 4   | 134,117,605 | 134,260,205 | 144781, 34205           | downstream, in gene     | 5.50     |
| NM_019732                                   | Runx3         | runt related transcription factor 3                                       | 4   | 134,676,560 | 134,733,905 | 43675                   | in gene                 | 6.00     |
| NM_013885                                   | Clic4         | chloride intracellular channel 4 (zeatichlorin)                           | 4   | 134,769,884 | 134,828,675 | 28163                   | in gene                 | 8.00     |
| NM_001080387,<br>NM_010178                  | Fusip1        | FUS interacting protein (serine-arginine rich) 1                          | 4   | 135,412,007 | 135,425,823 | 4121                    | in gene                 | 5.00     |
| NM_010142                                   | Ephb2         | Eph receptor B2                                                           | 4   | 136,209,523 | 136,391,850 | 104698, 86650           | in gene, in gene        | 5.00     |
| NM_007939                                   | Epha8         | Eph receptor A8                                                           | 4   | 136,485,334 | 136,512,733 | 7261, -483              | in gene, upstream       | 6.50     |
| NM_198248                                   | Zbtb40        | zinc finger and BTB domain containing 40                                  | 4   | 136,535,647 | 136,604,610 | 67010, 9170             | in gene, in gene        | 5.00     |
| NM_009523                                   | Wnt4          | wingless-related MMTV integration site 4                                  | 4   | 136,833,550 | 136,852,694 | 3570, 9056              | in gene, in gene        | 4.50     |
| NM_199307                                   | Ece1          | endothelin converting enzyme 1                                            | 4   | 137,418,212 | 137,521,144 | 51820, 68924            | in gene, in gene        | 6.00     |
| NM_026689                                   | 0610009K11Rik | RIKEN cDNA 0610009K11 gene                                                | 4   | 137,990,587 | 137,998,180 | 7029                    | in gene                 | 4.00     |
| NM_001037761,<br>NM_009798                  | Capzb         | capping protein (actin filament) muscle Z-line, beta                      | 4   | 138,748,846 | 138,847,727 | 54194                   | in gene                 | 6.00     |
| NM_145384                                   | Pqlc2         | PQ loop repeat containing 2                                               | 4   | 138,854,445 | 138,866,593 | -159                    | upstream                | 5.00     |
| XM_001479428                                | LOC100042808  | hypothetical protein LOC100042808                                         | 4   | 138,865,934 | 138,866,574 | -178                    | upstream                | 5.00     |
| NM_025337                                   | Akr7a5        | aldo-keto reductase family 7, member A5 (aflatoxin aldehyde reductase)    | 4   | 138,866,659 | 138,874,340 | 93                      | in gene                 | 5.00     |
| NM_175438                                   | Aldh4a1       | aldehyde dehydrogenase 4 family, member A1                                | 4   | 139,178,925 | 139,205,602 | 4651                    | in gene                 | 5.00     |
| NM_011039                                   | Pax7          | paired box gene 7                                                         | 4   | 139,293,996 | 139,388,883 | 76291, 8963             | in gene, in gene        | 6.00     |
| NM_198610                                   | Igsf21        | immunoglobulin superfamily, member 21                                     | 4   | 139,582,767 | 139,802,699 | 195851                  | in gene                 | 4.00     |
| NM_153106                                   | Pad16         | peptidyl arginine deiminase, type VI                                      | 4   | 140,283,270 | 140,298,558 | 21918, -1890            | downstream,<br>upstream | 5.00     |
| NM_011061                                   | Pad14         | peptidyl arginine deiminase, type IV                                      | 4   | 140,301,780 | 140,330,100 | 29652                   | downstream              | 5.00     |
| NM_029097                                   | Atp13a2       | ATPase type 13A2                                                          | 4   | 140,542,843 | 140,563,245 | 19125                   | in gene                 | 4.00     |
| NM_008546                                   | Mfap2         | microfibrillar-associated protein 2                                       | 4   | 140,566,618 | 140,571,888 | -4650                   | upstream                | 4.00     |
| NM_025383                                   | Necap2        | NECAP endocytosis associated 2                                            | 4   | 140,622,432 | 140,634,249 | 25                      | in gene                 | 6.00     |
| NM_177867                                   | Spata21       | spermatogenesis associated 21                                             | 4   | 140,644,260 | 140,668,674 | -10036                  | upstream                | 6.00     |
| NM_010139                                   | Epha2         | Eph receptor A2                                                           | 4   | 140,857,155 | 140,885,293 | 9805                    | in gene                 | 5.00     |
| NM_001033374                                | Gm694         | gene model 694, (NCBI)                                                    | 4   | 140,988,818 | 140,992,020 | -8940                   | upstream                | 7.00     |
| NM_009541                                   | Zbtb17        | zinc finger and BTB domain containing 17                                  | 4   | 141,000,599 | 141,023,144 | 361, 27033              | in gene, downstream     | 6.00     |
| NM_019763                                   | Spn           | SPEN homolog, transcriptional regulator (Drosophila)                      | 4   | 141,023,805 | 141,094,512 | 66880                   | in gene                 | 5.00     |
| NM_001081408                                | Agmat         | agmatine ureohydrolase (agmatinase)                                       | 4   | 141,302,590 | 141,315,178 | -8462                   | upstream                | 4.00     |



| Accession No.                                                    | Symbol        | Gene Title                                                                                        | Chr | Gene Start  | Gene End    | Interval Dists to Start        | Interval Pos              | Avg Peak |
|------------------------------------------------------------------|---------------|---------------------------------------------------------------------------------------------------|-----|-------------|-------------|--------------------------------|---------------------------|----------|
| NM_025994                                                        | Efh2          | EF hand domain containing 2                                                                       | 4   | 141,414,057 | 141,430,835 | 1640, 707                      | in gene, in gene          | 5.50     |
| NM_028429                                                        | Fhad1         | forkhead-associated (FHA) phosphopeptide binding domain 1                                         | 4   | 141,472,204 | 141,478,341 | 8165, -4987                    | downstream, upstream      | 10.50    |
| NM_001081355                                                     | Prdm2         | PR domain containing 2, with ZNF domain                                                           | 4   | 142,717,372 | 142,802,612 | 80564                          | in gene                   | 6.00     |
| NM_011610                                                        | Tnfrsf1b      | tumor necrosis factor receptor superfamily, member 1b                                             | 4   | 144,802,271 | 144,836,773 | 30597                          | in gene                   | 6.00     |
| NM_001025365                                                     | D4Wsu114e     | DNA segment, Chr 4, Wayne State University 114, expressed                                         | 4   | 147,234,900 | 147,242,656 | -608                           | upstream                  | 7.00     |
| NM_010244                                                        | Fv1           | Friend virus susceptibility 1                                                                     | 4   | 147,243,088 | 147,244,467 | 176                            | in gene                   | 7.00     |
| NM_133201                                                        | Mfn2          | mitofusin 2                                                                                       | 4   | 147,247,704 | 147,278,928 | 35664                          | downstream                | 7.00     |
| NM_011929                                                        | Clcn6         | chloride channel 6                                                                                | 4   | 147,380,593 | 147,412,876 | -116                           | upstream                  | 9.00     |
| NM_010840                                                        | Mthfr         | 5,10-methylenetetrahydrofolate reductase                                                          | 4   | 147,415,331 | 147,433,658 | -2339                          | upstream                  | 9.00     |
| NM_009642                                                        | Agtrap        | angiotensin II, type I receptor-associated protein                                                | 4   | 147,451,170 | 147,462,173 | 8237                           | in gene                   | 5.00     |
| NM_173401                                                        | Fbxo44        | F-box protein 44                                                                                  | 4   | 147,526,910 | 147,533,989 | -6507                          | upstream                  | 6.00     |
| NM_176848                                                        | Fbxo2         | F-box protein 2                                                                                   | 4   | 147,534,777 | 147,540,526 | 5719                           | in gene                   | 6.00     |
| NM_001039554                                                     | Angptl7       | angiopoietin-like 7                                                                               | 4   | 147,869,389 | 147,874,571 | -7317                          | upstream                  | 11.00    |
| NM_016699                                                        | Exosc10       | exosome component 10                                                                              | 4   | 147,932,567 | 147,956,506 | 33673                          | downstream                | 4.00     |
| NM_009272                                                        | Srm           | spermidine synthase                                                                               | 4   | 147,965,622 | 147,968,728 | 618                            | in gene                   | 4.00     |
| NM_022020                                                        | Rbp7          | retinol binding protein 7, cellular                                                               | 4   | 148,823,810 | 148,829,077 | 9541                           | downstream                | 6.00     |
| NM_023051                                                        | Clstn1        | calysntenin 1                                                                                     | 4   | 148,960,747 | 149,022,008 | 63925                          | downstream                | 4.00     |
| NM_001029837, NM_008840                                          | Pik3cd        | phosphatidylinositol 3-kinase catalytic delta polypeptide                                         | 4   | 149,023,277 | 149,072,798 | 48126                          | in gene                   | 4.00     |
| XM_001480126, XM_906187                                          | LOC435818     | novel member of the solute carrier family 2 (facilitated glucose transporter) Slc2 family         | 4   | 149,523,081 | 149,542,591 | 23575                          | downstream                | 6.00     |
| NM_001081557                                                     | Camta1        | calmodulin binding transcription activator 1                                                      | 4   | 150,433,635 | 151,235,855 | 571599, 497023, 179055, 122031 | in gene, in gene, in gene | 7.00     |
| NM_031867                                                        | Tas1r1        | taste receptor, type 1, member 1                                                                  | 4   | 151,402,023 | 151,412,677 | 117                            | in gene                   | 4.00     |
| NM_028727                                                        | Nol9          | nucleolar protein 9                                                                               | 4   | 151,413,443 | 151,435,603 | -883                           | upstream                  | 4.00     |
| XM_001000162, XM_987409                                          | EG666980      | predicted gene, EG666980                                                                          | 4   | 151,450,395 | 151,453,171 | -331                           | upstream                  | 5.00     |
| NM_001004156                                                     | Plekhg5       | pleckstrin homology domain containing, family G (with RhoGef domain) member 5                     | 4   | 151,470,828 | 151,489,509 | 15812                          | in gene                   | 6.00     |
| NM_033042                                                        | Tnfrsf25      | tumor necrosis factor receptor superfamily, member 25                                             | 4   | 151,490,452 | 151,494,220 | -3812                          | upstream                  | 6.00     |
| NM_019585, NM_207687, NM_207688, NM_207689, NM_207690, NM_207691 | Espn          | espin                                                                                             | 4   | 151,494,985 | 151,526,316 | 39676                          | downstream                | 6.00     |
| NM_201226                                                        | Lrrc47        | leucine rich repeat containing 47                                                                 | 4   | 153,385,912 | 153,395,621 | 11384                          | downstream                | 7.00     |
| XR_035126, XR_035127                                             | 1190007F08Rik | RIKEN cDNA 1190007F08 gene                                                                        | 4   | 153,397,420 | 153,400,259 | 2963                           | downstream                | 7.00     |
| NM_001033455                                                     | Ccdc27        | coiled-coil domain containing 27                                                                  | 4   | 153,400,753 | 153,416,786 | 19490                          | downstream                | 7.00     |
| XM_620148, XM_909777                                             | Megf6         | multiple EGF-like-domains 6                                                                       | 4   | 153,544,822 | 153,649,830 | 4986                           | in gene                   | 6.00     |
| NM_172990                                                        | Pank4         | pantothenate kinase 4                                                                             | 4   | 154,338,242 | 154,354,982 | 22462                          | downstream                | 7.00     |
| NM_175556                                                        | Plch2         | phospholipase C, eta 2                                                                            | 4   | 154,357,482 | 154,385,093 | 24389                          | in gene                   | 7.00     |
| NM_001039079, NM_008860                                          | Prkcz         | protein kinase C, zeta                                                                            | 4   | 154,634,229 | 154,735,500 | 81452, 55756                   | in gene, in gene          | 5.50     |
| NM_177186                                                        | A530082C11Rik | RIKEN cDNA A530082C11 gene                                                                        | 4   | 154,975,525 | 154,997,449 | 11515                          | in gene                   | 5.00     |
| NM_207223                                                        | Centb5        | centaurin, beta 5                                                                                 | 4   | 155,265,984 | 155,281,360 | 11608                          | in gene                   | 4.00     |
| NM_026033                                                        | Gatad1        | GATA zinc finger domain containing 1                                                              | 5   | 3,639,969   | 3,647,917   | 157                            | in gene                   | 6.00     |
| NM_029141                                                        | 4930511M11Rik | RIKEN cDNA 4930511M11 gene                                                                        | 5   | 3,657,004   | 3,679,416   | -9244                          | upstream                  | 6.00     |
| NM_001003909                                                     | Ankib1        | ankyrin repeat and IBR domain containing 1                                                        | 5   | 3,690,000   | 3,802,925   | -51                            | upstream                  | 4.00     |
| NM_030675                                                        | Krit1         | KRIT1, ankyrin repeat containing                                                                  | 5   | 3,803,189   | 3,841,359   | -213                           | upstream                  | 4.00     |
| NM_022890                                                        | Cldn12        | claudin 12                                                                                        | 5   | 5,505,109   | 5,514,873   | 366                            | in gene                   | 6.00     |
| NM_013726                                                        | Dbf4          | DBF4 homolog (S. cerevisiae)                                                                      | 5   | 8,397,011   | 8,422,606   | 334                            | in gene                   | 6.00     |
| NM_178766                                                        | Slc25a40      | solute carrier family 25, member 40                                                               | 5   | 8,422,838   | 8,459,978   | -566                           | upstream                  | 6.00     |
| NM_011806                                                        | Dmtf1         | cyclin D binding myb-like transcription factor 1                                                  | 5   | 9,118,801   | 9,161,718   | -442                           | upstream                  | 7.00     |
| NM_011348                                                        | Sema3e        | sema domain, immunoglobulin domain (Ig), short basic domain, secreted, (semaphorin) 3E            | 5   | 14,025,276  | 14,256,689  | 148676                         | in gene                   | 6.00     |
| NM_178403                                                        | Pus7          | pseudouridylyl synthase 7 homolog (S. cerevisiae)                                                 | 5   | 23,246,514  | 23,289,479  | 14647                          | in gene                   | 5.00     |
| NM_013853                                                        | Abcf2         | ATP-binding cassette, sub-family F (GCN20), member 2                                              | 5   | 24,071,163  | 24,083,177  | -9511                          | upstream                  | 6.00     |
| XM_001478455                                                     | LOC100042348  | similar to ATP synthase, H+ transporting, mitochondrial F0 complex, subunit G                     | 5   | 24,087,207  | 24,087,731  | -4957                          | upstream                  | 6.00     |
|                                                                  | Mirn671       | microRNA 671                                                                                      | 5   | 24,097,931  | 24,098,028  | -5243                          | upstream                  | 6.00     |
| NM_025891                                                        | Smarcd3       | SWI/SNF related, matrix associated, actin dependent regulator of chromatin, subfamily d, member 3 | 5   | 24,098,440  | 24,107,820  | 15132, -2996                   | downstream, upstream      | 6.50     |
| NM_016736                                                        | Nub1          | negative regulator of ubiquitin-like proteins 1                                                   | 5   | 24,191,633  | 24,216,373  | 12207                          | in gene                   | 4.00     |
| NM_010608                                                        | Kcnk3         | potassium channel, subfamily K, member 3                                                          | 5   | 30,890,543  | 30,927,643  | 18305                          | in gene                   | 5.00     |
| NM_175675                                                        | 4930471M23Rik | RIKEN cDNA 4930471M23 gene                                                                        | 5   | 30,950,336  | 30,962,102  | -7232                          | upstream                  | 6.00     |
| NM_011773                                                        | Slc30a3       | solute carrier family 30 (zinc transporter), member 3                                             | 5   | 31,390,322  | 31,395,871  | 14943                          | downstream                | 5.00     |

| Accession No.                                                                 | Symbol        | Gene Title                                                            | Chr | Gene Start  | Gene End    | Interval Dists to Start        | Interval Pos                       | Avg Peak |
|-------------------------------------------------------------------------------|---------------|-----------------------------------------------------------------------|-----|-------------|-------------|--------------------------------|------------------------------------|----------|
| NM_009535                                                                     | Yes1          | Yamaguchi sarcoma viral (v-yes) oncogene homolog 1                    | 5   | 32,913,606  | 32,989,430  | -22                            | upstream                           | 5.00     |
| NM_177298                                                                     | Pisd          | phosphatidylserine decarboxylase                                      | 5   | 33,078,962  | 33,128,275  | 55355                          | downstream                         | 4.00     |
| XM_001473635                                                                  | LOC672284     | similar to NK1 transcription factor related 2-like, b                 | 5   | 33,773,383  | 33,776,625  | -4335                          | upstream                           | 6.00     |
| NM_008010                                                                     | Fgfr3         | fibroblast growth factor receptor 3                                   | 5   | 34,064,373  | 34,079,712  | -5061                          | upstream                           | 6.00     |
| NM_010753                                                                     | Mxd4          | Max dimerization protein 4                                            | 5   | 34,519,229  | 34,530,359  | 215                            | in gene                            | 5.00     |
| NM_001030306                                                                  | BC037112      | cDNA sequence BC037112                                                | 5   | 34,763,500  | 34,829,105  | 45268                          | in gene                            | 6.00     |
| NM_013587                                                                     | Lrpap1        | low density lipoprotein receptor-related protein associated protein 1 | 5   | 35,434,155  | 35,448,346  | 106                            | in gene                            | 5.00     |
| NM_175249                                                                     | 2310020A21Rik | RIKEN cDNA 2310020A21 gene                                            | 5   | 36,546,670  | 36,549,217  | 3378                           | downstream                         | 6.00     |
| NM_025725                                                                     | Ccdc96        | coiled-coil domain containing 96                                      | 5   | 36,827,237  | 36,830,820  | 6875                           | downstream                         | 4.00     |
| NM_133724                                                                     | Cno           | cappuccino                                                            | 5   | 37,138,613  | 37,139,918  | 11054                          | downstream                         | 6.00     |
| NM_178394                                                                     | Jakmip1       | janus kinase and microtubule interacting protein 1                    | 5   | 37,442,155  | 37,516,534  | 71573                          | in gene                            | 5.00     |
| NM_022416                                                                     | Stk32b        | serine/threonine kinase 32B                                           | 5   | 37,838,064  | 38,108,302  | 159790                         | in gene                            | 7.00     |
| XM_001474616                                                                  | LOC100040397  | similar to Ubtf protein                                               | 5   | 38,551,062  | 38,580,819  | 18842                          | in gene                            | 6.00     |
| NM_025480                                                                     | Tmem128       | transmembrane protein 128                                             | 5   | 38,651,614  | 38,660,857  | 17938                          | downstream                         | 5.00     |
| NM_172709                                                                     | Otop1         | otopetrin 1                                                           | 5   | 38,668,657  | 38,695,419  | 895                            | in gene                            | 5.00     |
| NM_173764                                                                     | Tapt1         | transmembrane anterior posterior transformation 1                     | 5   | 44,566,398  | 44,617,845  | 341                            | in gene                            | 7.00     |
| NM_172710                                                                     | 2310045A20Rik | RIKEN cDNA 2310045A20 gene                                            | 5   | 53,498,396  | 53,604,558  | 382                            | in gene                            | 5.00     |
| NM_029554                                                                     | 0610040J01Rik | RIKEN cDNA 0610040J01 gene                                            | 5   | 64,203,603  | 64,290,858  | 91149                          | downstream                         | 7.00     |
| NM_145923                                                                     | AA536743      | expressed sequence AA536743                                           | 5   | 64,300,137  | 64,360,136  | 65384                          | downstream                         | 7.00     |
| NM_026667                                                                     | 9130005N14Rik | RIKEN cDNA 9130005N14 gene                                            | 5   | 65,361,351  | 65,433,113  | 39049                          | in gene                            | 7.00     |
| NM_001081321                                                                  | 9030416H16Rik | RIKEN cDNA 9030416H16 gene                                            | 5   | 66,006,499  | 66,089,095  | -5577                          | upstream                           | 6.00     |
| NM_001081104                                                                  | Chrna9        | cholinergic receptor, nicotinic, alpha polypeptide 9                  | 5   | 66,358,363  | 66,368,725  | -3195                          | upstream                           | 5.00     |
| NM_001001980                                                                  | 3732412D22Rik | RIKEN cDNA 3732412D22 gene                                            | 5   | 67,137,079  | 67,448,398  | 63945                          | in gene                            | 5.00     |
| NM_153389                                                                     | Atp10d        | ATPase, Class V, type 10D                                             | 5   | 72,594,582  | 72,702,533  | -182, 1114                     | upstream, in gene                  | 6.50     |
| NM_011890                                                                     | Sgcb          | sarcoglycan, beta (dystrophin-associated glycoprotein)                | 5   | 74,023,988  | 74,038,970  | 314                            | in gene                            | 8.00     |
| XM_001478951,<br>XM_001479212                                                 | Spata18       | spermatogenesis associated 18                                         | 5   | 74,042,619  | 74,070,723  | -3963                          | upstream                           | 8.00     |
| NM_177561                                                                     | Usp46         | ubiquitin specific peptidase 46                                       | 5   | 74,396,062  | 74,464,436  | -12                            | upstream                           | 5.00     |
| NM_026878                                                                     | Rasl11b       | RAS-like, family 11, member B                                         | 5   | 74,591,351  | 74,595,502  | 6409                           | downstream                         | 5.00     |
| NM_010727                                                                     | Lnx1          | ligand of numb-protein X 1                                            | 5   | 74,988,472  | 75,073,849  | -2023                          | upstream                           | 5.00     |
| XR_035374,<br>XR_035406                                                       | EG619945      | predicted gene, EG619945                                              | 5   | 75,345,219  | 75,362,393  | 22397                          | downstream                         | 6.00     |
| NM_021099                                                                     | Kit           | kit oncogene                                                          | 5   | 75,971,049  | 76,052,747  | 11847                          | in gene                            | 5.00     |
| NM_011626                                                                     | Tmem165       | transmembrane protein 165                                             | 5   | 76,612,905  | 76,638,269  | 599                            | in gene                            | 6.00     |
| NM_026735                                                                     | Mobk1a        | MOB1, Mps One Binder kinase activator-like 1A (yeast)                 | 5   | 89,149,896  | 89,187,480  | -72                            | upstream                           | 9.00     |
| NM_016912,<br>NM_177270                                                       | Cdkl2         | cyclin-dependent kinase-like 2 (CDC2-related kinase)                  | 5   | 92,435,101  | 92,472,044  | 348                            | in gene                            | 5.00     |
| XM_001475024                                                                  | LOC100040574  | hypothetical protein LOC100040574                                     | 5   | 92,471,213  | 92,472,909  | 483                            | in gene                            | 5.00     |
| NM_001080794,<br>NM_001080795,<br>NM_001080796,<br>NM_001080797,<br>NM_011816 | G3bp2         | GTPase activating protein (SH3 domain) binding protein 2              | 5   | 92,481,172  | 92,512,761  | 41065                          | downstream                         | 5.00     |
| NM_007644                                                                     | Scarb2        | scavenger receptor class B, member 2                                  | 5   | 92,872,899  | 92,934,634  | 53                             | in gene                            | 4.00     |
| NM_001033478                                                                  | Gm1381        | gene model 1381, (NCBI)                                               | 5   | 93,000,563  | 93,019,762  | -9363                          | upstream                           | 6.00     |
| NM_144910,<br>NM_178854                                                       | Cnot6l        | CCR4-NOT transcription complex, subunit 6-like                        | 5   | 96,504,756  | 96,591,009  | -783                           | upstream                           | 6.00     |
| NM_013470                                                                     | Anxa3         | annexin A3                                                            | 5   | 97,222,434  | 97,274,987  | 12286, 12670                   | in gene, in gene                   | 4.50     |
| XM_982666                                                                     | EG666266      | predicted gene, EG666266                                              | 5   | 97,350,291  | 97,363,886  | -8211, 9277                    | upstream, in gene                  | 6.00     |
| NM_029947                                                                     | Prdm8         | PR domain containing 8                                                | 5   | 98,609,888  | 98,616,467  | -4992                          | upstream                           | 6.00     |
| NM_001081107                                                                  | Hel308        | helicase, mus308-like (Drosophila)                                    | 5   | 101,191,167 | 101,227,619 | -9853                          | upstream                           | 4.00     |
| NM_026826                                                                     | Mrps18c       | mitochondrial ribosomal protein S18C                                  | 5   | 101,227,778 | 101,233,486 | 9694                           | downstream                         | 4.00     |
| NM_172405                                                                     | Ccdc98        | coiled-coil domain containing 98                                      | 5   | 101,233,821 | 101,249,954 | 12482                          | in gene                            | 4.00     |
| NM_172882                                                                     | Wdfy3         | WD repeat and FYVE domain containing 3                                | 5   | 102,264,604 | 102,498,940 | 181532                         | in gene                            | 5.00     |
| NM_178741                                                                     | Klhl8         | kelch-like 8 (Drosophila)                                             | 5   | 104,291,069 | 104,340,248 | 37960, 16498                   | in gene, in gene                   | 6.00     |
| NM_010097                                                                     | Sparcl1       | SPARC-like 1 (mast9, hevin)                                           | 5   | 104,508,130 | 104,542,723 | -9885                          | upstream                           | 7.00     |
| XM_001475877                                                                  | LOC100041145  | hypothetical protein LOC100041145                                     | 5   | 104,668,332 | 104,700,005 | 31077, 5253                    | in gene, in gene                   | 6.00     |
| NM_018759                                                                     | Zfp326        | zinc finger protein 326                                               | 5   | 106,305,621 | 106,344,831 | 387                            | in gene                            | 5.00     |
| NM_026062                                                                     | 2900024C23Rik | RIKEN cDNA 2900024C23 gene                                            | 5   | 108,337,357 | 108,416,052 | 42036                          | in gene                            | 6.00     |
| NM_008325                                                                     | Idua          | iduronidase, alpha-L-                                                 | 5   | 109,098,384 | 109,113,573 | 5360                           | in gene                            | 7.00     |
| NM_174870                                                                     | Slc26a1       | solute carrier family 26 (sulfate transporter), member 1              | 5   | 109,098,897 | 109,104,588 | 844                            | in gene                            | 7.00     |
| XM_001479076                                                                  | LOC100042616  | hypothetical protein LOC100042616                                     | 5   | 109,112,928 | 109,123,081 | 19337                          | downstream                         | 7.00     |
| NM_008146                                                                     | Golga3        | golgi autoantigen, golgin subfamily a, 3                              | 5   | 110,605,720 | 110,652,174 | 54259                          | downstream                         | 5.00     |
| NM_027922                                                                     | D5Erttd585e   | DNA segment, Chr 5, ERATO Doi 585, expressed                          | 5   | 110,660,060 | 110,685,667 | -81                            | upstream                           | 5.00     |
| NM_153570                                                                     | Noc4l         | nucleolar complex associated 4 homolog (S. cerevisiae)                | 5   | 111,077,438 | 111,082,401 | 2865                           | in gene                            | 5.00     |
| NM_027156                                                                     | Ddx51         | DEAD (Asp-Glu-Ala-Asp) box polypeptide 51                             | 5   | 111,082,493 | 111,089,515 | -2957                          | upstream                           | 5.00     |
| NM_016681                                                                     | Chek2         | CHK2 checkpoint homolog (S. pombe)                                    | 5   | 111,269,036 | 111,303,152 | 29588                          | in gene                            | 10.00    |
| XM_001476544,<br>XM_001481308                                                 | Ttc28         | tetratricopeptide repeat domain 28                                    | 5   | 111,308,822 | 111,718,799 | 258218, 283706, 312890, 320826 | in gene, in gene, in gene, in gene | 5.75     |

| Accession No.                               | Symbol        | Gene Title                                                                        | Chr | Gene Start  | Gene End    | Interval Dists to Start   | Interval Pos                       | Avg Peak |
|---------------------------------------------|---------------|-----------------------------------------------------------------------------------|-----|-------------|-------------|---------------------------|------------------------------------|----------|
| NM_001081235                                | Mn1           | meningioma 1                                                                      | 5   | 111,847,186 | 111,886,045 | 11566                     | in gene                            | 6.00     |
| NM_021351                                   | Cryba4        | crystallin, beta A4                                                               | 5   | 112,675,553 | 112,681,522 | 3943                      | in gene                            | 5.00     |
| NM_023695                                   | Crybb1        | crystallin, beta B1                                                               | 5   | 112,684,814 | 112,698,602 | -7262                     | upstream                           | 5.00     |
| NM_018783                                   | Ttip11        | tufelin interacting protein 11                                                    | 5   | 112,755,389 | 112,767,093 | 99                        | in gene                            | 5.00     |
| NM_019982                                   | Sez6l         | seizure related 6 homolog like                                                    | 5   | 112,848,176 | 113,006,205 | 55677                     | in gene                            | 4.00     |
| NM_001035531,<br>NM_177078                  | Adrbk2        | adrenergic receptor kinase, beta 2                                                | 5   | 113,339,498 | 113,444,534 | 57078, 8134, 374          | in gene, in gene, in gene          | 5.67     |
| NM_007773                                   | Crybb2        | crystallin, beta B2                                                               | 5   | 113,487,285 | 113,497,786 | 8778                      | in gene                            | 6.00     |
| XM_001479469                                | LOC100042920  | hypothetical protein LOC100042920                                                 | 5   | 113,497,074 | 113,497,791 | 8783                      | downstream                         | 6.00     |
| NM_001033428                                | Gm854         | gene model 854, (NCBI)                                                            | 5   | 113,655,929 | 113,668,283 | -169                      | upstream                           | 6.00     |
|                                             | Mirn469       | microRNA 469                                                                      | 5   | 113,772,105 | 113,772,178 | 5527                      | downstream                         | 5.00     |
| NM_001012726                                | Aym1          | activator of yeast meiotic promoters 1                                            | 5   | 113,786,314 | 113,786,841 | -8682                     | upstream                           | 5.00     |
| NM_146162                                   | Tmem119       | transmembrane protein 119                                                         | 5   | 114,243,738 | 114,250,367 | -65                       | upstream                           | 7.00     |
| NM_009151                                   | Selplg        | selectin, platelet (p-selectin) ligand                                            | 5   | 114,268,561 | 114,280,442 | 14986                     | downstream                         | 6.00     |
| NM_198109                                   | Ssh1          | slingshot homolog 1 (Drosophila)                                                  | 5   | 114,392,228 | 114,443,766 | 36566, 24982, 17510, 6966 | in gene, in gene, in gene, in gene | 6.75     |
| NM_026145                                   | Kctd10        | potassium channel tetramerisation domain containing 10                            | 5   | 114,813,583 | 114,830,480 | -416                      | upstream                           | 8.00     |
| NM_054093                                   | Ube3b         | ubiquitin protein ligase E3B                                                      | 5   | 114,830,616 | 114,871,175 | 280                       | in gene                            | 8.00     |
| NM_029956                                   | Mmab          | methylmalonic aciduria (cobalamin deficiency) type B homolog (human)              | 5   | 114,881,043 | 114,894,036 | 9924, -6236               | in gene, upstream                  | 6.00     |
| NM_023556                                   | Mvk           | mevalonate kinase                                                                 | 5   | 114,894,315 | 114,910,600 | 5957                      | in gene                            | 5.00     |
| NM_001004180                                | BC057022      | cDNA sequence BC057022                                                            | 5   | 115,018,260 | 115,063,227 | 41068                     | in gene                            | 4.00     |
| NM_019821                                   | Gltf          | glycolipid transfer protein                                                       | 5   | 115,119,499 | 115,140,944 | -80                       | upstream                           | 6.00     |
| XM_001478355,<br>XM_001478612               | 1500011B03Rik | RIKEN cDNA 1500011B03 gene                                                        | 5   | 115,258,205 | 115,263,985 | 9729                      | downstream                         | 5.00     |
| NM_011107                                   | Pla2g1b       | phospholipase A2, group IB, pancreas                                              | 5   | 115,916,275 | 115,924,726 | 4717                      | in gene                            | 6.00     |
| XM_485674,<br>XM_988059                     | Sirt4         | sirtuin 4 (silent mating type information regulation 2 homolog) 4 (S. cerevisiae) | 5   | 115,928,019 | 115,940,415 | 19423                     | downstream                         | 6.00     |
| NM_001080808                                | Ccdc64        | coiled-coil domain containing 64                                                  | 5   | 116,099,295 | 116,181,568 | 66091, 352                | in gene, in gene                   | 5.50     |
| NM_007708                                   | Cit           | citron                                                                            | 5   | 116,295,665 | 116,456,352 | 13007, 169039             | in gene, downstream                | 5.50     |
| NM_031869                                   | Prkab1        | protein kinase, AMP-activated, beta 1 non-catalytic subunit                       | 5   | 116,463,599 | 116,474,437 | 9733                      | in gene                            | 5.00     |
| NM_011535,<br>NM_198052                     | Tbx3          | T-box 3                                                                           | 5   | 120,120,678 | 120,134,610 | -1382, -902, 122          | upstream, upstream, in gene        | 6.00     |
| NM_008499                                   | Lhx5          | LIM homeobox protein 5                                                            | 5   | 120,881,910 | 120,891,466 | -7427                     | upstream                           | 4.00     |
| NM_133221                                   | Slc24a6       | solute carrier family 24 (sodium/potassium/calcium exchanger), member 6           | 5   | 120,961,201 | 120,984,028 | 23663, 27887              | downstream, downstream             | 6.00     |
| NM_029096                                   | 1110008J03Rik | RIKEN cDNA 1110008J03 gene                                                        | 5   | 121,059,072 | 121,062,578 | 1234, -318                | in gene, upstream                  | 7.00     |
| NM_028041                                   | Ddx54         | DEAD (Asp-Glu-Ala-Asp) box polypeptide 54                                         | 5   | 121,063,139 | 121,078,601 | -1795, -243               | upstream, upstream                 | 7.00     |
| XM_622379,<br>XM_923515                     | EG545802      | predicted gene, EG545802                                                          | 5   | 121,670,208 | 121,704,753 | 41792                     | downstream                         | 6.00     |
| XM_132325,<br>XM_990451                     | AU042671      | expressed sequence AU042671                                                       | 5   | 121,708,332 | 121,818,584 | 3668                      | in gene                            | 6.00     |
| NM_172722                                   | C330023M02Rik | RIKEN cDNA C330023M02 gene                                                        | 5   | 121,847,991 | 121,890,122 | 50745                     | downstream                         | 5.00     |
| NM_026129                                   | Erp29         | endoplasmic reticulum protein 29                                                  | 5   | 121,894,762 | 121,902,483 | 3747                      | in gene                            | 5.00     |
| NM_009656                                   | Aldh2         | aldehyde dehydrogenase 2, mitochondrial                                           | 5   | 122,017,696 | 122,043,833 | 9481                      | in gene                            | 7.00     |
| NM_028037                                   | Acad10        | acyl-Coenzyme A dehydrogenase family, member 10                                   | 5   | 122,071,036 | 122,110,488 | 104                       | in gene                            | 6.00     |
| NM_028227                                   | Brap          | BRCA1 associated protein                                                          | 5   | 122,110,595 | 122,137,257 | -211                      | upstream                           | 6.00     |
| NM_008507                                   | Sh2b3         | SH2B adaptor protein 3                                                            | 5   | 122,267,224 | 122,286,810 | 2858, -6278               | in gene, upstream                  | 5.50     |
| NM_175474                                   | A230106M15Rik | RIKEN cDNA A230106M15 gene                                                        | 5   | 122,299,037 | 122,304,608 | -5949, -957, -157         | upstream, upstream, upstream       | 6.33     |
| NM_007804                                   | Cutl2         | cut-like 2 (Drosophila)                                                           | 5   | 122,310,225 | 122,497,834 | -2251                     | upstream                           | 6.00     |
| NM_013636                                   | Ppp1cc        | protein phosphatase 1, catalytic subunit, gamma isoform                           | 5   | 122,608,288 | 122,625,278 | -32                       | upstream                           | 6.00     |
| NM_001039153                                | Tect1         | tectonic 1                                                                        | 5   | 122,691,524 | 122,714,469 | 37                        | in gene                            | 5.00     |
| NM_001003953,<br>NM_001005866,<br>NM_013910 | Fbxl10        | F-box and leucine-rich repeat protein 10                                          | 5   | 123,320,677 | 123,439,101 | -163                      | upstream                           | 6.00     |
| NM_001039723                                | BC022593      | cDNA sequence BC022593                                                            | 5   | 123,526,284 | 123,567,454 | -44                       | upstream                           | 6.00     |
| XM_485681,<br>XM_915421                     | Wdr66         | WD repeat domain 66                                                               | 5   | 123,703,865 | 123,776,806 | 21330                     | in gene                            | 6.00     |
| XM_132344,<br>XM_915437                     | Il31          | interleukin 31                                                                    | 5   | 123,930,166 | 123,932,110 | -5394                     | upstream                           | 6.00     |
| NM_001033461                                | Lrrc43        | leucine rich repeat containing 43                                                 | 5   | 123,939,334 | 123,958,213 | -1830                     | upstream                           | 6.00     |
| NM_175520                                   | Gpr81         | G protein-coupled receptor 81                                                     | 5   | 124,326,987 | 124,330,012 | -8612                     | upstream                           | 5.00     |
| NM_145070                                   | Hip1r         | huntingtin interacting protein 1 related                                          | 5   | 124,423,648 | 124,453,209 | 26688, 29376              | in gene, in gene                   | 7.00     |
| NM_019875                                   | Abcb9         | ATP-binding cassette, sub-family B (MDR/TAP), member 9                            | 5   | 124,511,866 | 124,545,807 | 8815                      | in gene                            | 5.00     |
| NM_025671                                   | Ogfod2        | 2-oxoglutarate and iron-dependent oxygenase domain containing 2                   | 5   | 124,562,347 | 124,565,485 | -459, 9349                | upstream, downstream               | 5.50     |
| NM_144509                                   | Arl6ip4       | ADP-ribosylation factor-like 6 interacting protein 4                              | 5   | 124,566,117 | 124,568,204 | -4229, 5579               | upstream, downstream               | 5.50     |
| NM_011256                                   | Pitpm2        | phosphatidylinositol transfer protein, membrane-associated 2                      | 5   | 124,568,700 | 124,666,427 | 104539, 94731             | downstream, in gene                | 5.50     |
| NM_030241                                   | Setd8         | SET domain containing (lysine methyltransferase) 8                                | 5   | 124,889,939 | 124,912,316 | 5405                      | in gene                            | 8.00     |
| NM_181410                                   | Gtf2h3        | general transcription factor IIH, polypeptide 3                                   | 5   | 125,029,180 | 125,046,850 | 14836                     | in gene                            | 5.00     |

| Accession No.                                                                                                                                                      | Symbol        | Gene Title                                                              | Chr | Gene Start  | Gene End    | Interval Dists to Start | Interval Pos              | Avg Peak |
|--------------------------------------------------------------------------------------------------------------------------------------------------------------------|---------------|-------------------------------------------------------------------------|-----|-------------|-------------|-------------------------|---------------------------|----------|
| NM_026486                                                                                                                                                          | 4432405B04Rik | RIKEN cDNA 4432405B04 gene                                              | 5   | 125,048,793 | 125,077,658 | -4777                   | upstream                  | 5.00     |
| XM_001474159,<br>XM_915600                                                                                                                                         | Dnahc10       | dynein, axonemal, heavy chain 10                                        | 5   | 125,205,455 | 125,314,678 | 96316                   | in gene                   | 5.00     |
| NM_016741                                                                                                                                                          | Scarb1        | scavenger receptor class B, member 1                                    | 5   | 125,757,460 | 125,821,444 | -4508                   | upstream                  | 6.00     |
| NM_029752                                                                                                                                                          | Bri3bp        | Bri3 binding protein                                                    | 5   | 125,921,938 | 125,941,255 | 24174                   | downstream                | 6.00     |
| NM_030210                                                                                                                                                          | Aacs          | acetoacetyl-CoA synthetase                                              | 5   | 125,956,243 | 125,997,773 | -10131, 37149           | upstream, in gene         | 5.50     |
| NM_133895                                                                                                                                                          | Slc15a4       | solute carrier family 15, member 4                                      | 5   | 128,076,036 | 128,097,762 | -22                     | upstream                  | 4.00     |
| NM_175284                                                                                                                                                          | Fzd10         | frizzled homolog 10 (Drosophila)                                        | 5   | 129,106,981 | 129,109,968 | -2661                   | upstream                  | 5.00     |
| NM_001081342                                                                                                                                                       | Gpr133        | G protein-coupled receptor 133                                          | 5   | 129,602,625 | 129,710,474 | 110191                  | downstream                | 6.00     |
| XM_001471643                                                                                                                                                       | LOC100038887  | hypothetical protein LOC100038887                                       | 5   | 130,320,838 | 130,322,231 | 9482                    | downstream                | 6.00     |
| NM_026445                                                                                                                                                          | Sumf2         | sulfatase modifying factor 2                                            | 5   | 130,322,866 | 130,339,827 | 7454                    | in gene                   | 6.00     |
| NM_011079                                                                                                                                                          | Phkg1         | phosphorylase kinase gamma 1                                            | 5   | 130,339,311 | 130,354,954 | 24634                   | downstream                | 6.00     |
| NM_021371                                                                                                                                                          | Caln1         | calneuron 1                                                             | 5   | 130,924,671 | 131,316,071 | 380913                  | in gene                   | 8.00     |
| NM_033572                                                                                                                                                          | Wbscr16       | Williams-Beuren syndrome chromosome region 16 homolog (human)           | 5   | 134,623,946 | 134,652,637 | 22701                   | in gene                   | 7.00     |
| NM_010876                                                                                                                                                          | Ncf1          | neutrophil cytosolic factor 1                                           | 5   | 134,696,129 | 134,705,449 | -7975                   | upstream                  | 7.00     |
| NM_001080746,<br>NM_001080747,<br>NM_001080748,<br>NM_001080749,<br>NM_010365                                                                                      | Gtf2i         | general transcription factor II I                                       | 5   | 134,713,704 | 134,790,616 | 77192                   | downstream                | 7.00     |
| NM_001081462,<br>NM_001081463,<br>NM_001081464,<br>NM_001081465,<br>NM_001081466,<br>NM_001081467,<br>NM_001081468,<br>NM_001081469,<br>NM_001081470,<br>NM_020331 | Gtf2ird1      | general transcription factor II I repeat domain-containing 1            | 5   | 134,833,531 | 134,932,581 | 68997                   | in gene                   | 7.00     |
| NM_001039162,<br>NM_009990                                                                                                                                         | Clip2         | CAP-GLY domain containing linker protein 2                              | 5   | 134,965,256 | 135,028,304 | 69936                   | downstream                | 7.00     |
| NM_010717                                                                                                                                                          | Limk1         | LIM-domain containing, protein kinase                                   | 5   | 135,131,909 | 135,164,460 | 19516                   | in gene                   | 6.00     |
| NM_024479                                                                                                                                                          | Wbscr27       | Williams Beuren syndrome chromosome region 27 (human)                   | 5   | 135,408,243 | 135,418,507 | 2893                    | in gene                   | 5.00     |
| NM_009903                                                                                                                                                          | Cldn4         | claudin 4                                                               | 5   | 135,420,997 | 135,422,785 | 11649                   | downstream                | 5.00     |
| NM_025375                                                                                                                                                          | Wbscr22       | Williams Beuren syndrome chromosome region 22                           | 5   | 135,528,827 | 135,539,980 | -52                     | upstream                  | 7.00     |
| NM_025362                                                                                                                                                          | Wbscr18       | Williams-Beuren syndrome chromosome region 18 homolog (human)           | 5   | 135,540,076 | 135,541,235 | -44                     | upstream                  | 7.00     |
| NM_177574                                                                                                                                                          | Vps37d        | vacuolar protein sorting 37D (yeast)                                    | 5   | 135,548,771 | 135,554,136 | 14104                   | downstream                | 7.00     |
| NM_146001                                                                                                                                                          | Hip1          | huntingtin interacting protein 1                                        | 5   | 135,883,896 | 136,020,985 | 55545, 47001            | in gene, in gene          | 7.00     |
| NM_008898                                                                                                                                                          | Por           | P450 (cytochrome) oxidoreductase                                        | 5   | 136,165,084 | 136,211,195 | 36452                   | in gene                   | 7.00     |
| NM_172541                                                                                                                                                          | 2010310D06Rik | RIKEN cDNA 2010310D06 gene                                              | 5   | 136,211,360 | 136,220,042 | 18506                   | downstream                | 7.00     |
| NM_013560                                                                                                                                                          | Hspb1         | heat shock protein 1                                                    | 5   | 136,363,929 | 136,365,307 | -8073, -217             | upstream, upstream        | 5.00     |
| XM_355648,<br>XM_916633                                                                                                                                            | Scrb4d        | scavenger receptor cysteine rich domain containing, group B (4 domains) | 5   | 136,436,093 | 136,450,346 | 2570                    | in gene                   | 6.00     |
| NM_011776                                                                                                                                                          | Zp3           | zona pellucida glycoprotein 3                                           | 5   | 136,455,975 | 136,464,494 | -8199, 15065            | upstream,<br>downstream   | 5.50     |
| NM_023742                                                                                                                                                          | Dtx2          | deltex 2 homolog (Drosophila)                                           | 5   | 136,470,747 | 136,508,734 | 293                     | in gene                   | 5.00     |
| NM_009986,<br>NM_198602                                                                                                                                            | Cut1          | cut-like 1 (Drosophila)                                                 | 5   | 136,724,005 | 137,043,301 | 138197, 133             | in gene, in gene          | 5.50     |
| NM_024474                                                                                                                                                          | Emid2         | EMI domain containing 2                                                 | 5   | 137,217,634 | 137,358,977 | 72433, 28513            | in gene, in gene          | 6.00     |
| NM_026073                                                                                                                                                          | Rabl5         | RAB, member of RAS oncogene family-like 5                               | 5   | 137,384,020 | 137,389,114 | 28                      | in gene                   | 4.00     |
| NM_031405                                                                                                                                                          | Ars2          | arsenate resistance protein 2                                           | 5   | 137,737,059 | 137,748,395 | -42, -6821              | upstream, upstream        | 5.00     |
| NM_011639                                                                                                                                                          | Trip6         | thyroid hormone receptor interactor 6                                   | 5   | 137,751,127 | 137,755,469 | 7032, 253               | downstream, in gene       | 5.00     |
| NM_031406                                                                                                                                                          | Slc12a9       | solute carrier family 12 (potassium/chloride transporters), member 9    | 5   | 137,755,787 | 137,774,730 | 26293, 19514            | downstream,<br>downstream | 5.00     |
| NM_028753                                                                                                                                                          | Pop7          | processing of precursor 7, ribonuclease P family, (S. cerevisiae)       | 5   | 137,942,667 | 137,943,659 | -277                    | upstream                  | 6.00     |
| XM_001474488,<br>XM_001479030,<br>XM_983418                                                                                                                        | EG666372      | predicted gene, EG666372                                                | 5   | 137,950,830 | 137,958,806 | -6894                   | upstream                  | 6.00     |
| NM_031408                                                                                                                                                          | Perq1         | PERQ amino acid rich, with GYF domain 1                                 | 5   | 137,960,366 | 137,966,932 | 9298                    | downstream                | 7.00     |
| NM_010312                                                                                                                                                          | Gnb2          | guanine nucleotide binding protein, beta 2                              | 5   | 137,969,357 | 137,974,457 | 4793                    | in gene                   | 7.00     |
| NM_027242                                                                                                                                                          | 2010007H12Rik | RIKEN cDNA 2010007H12 gene                                              | 5   | 138,220,146 | 138,221,335 | 7438                    | downstream                | 5.00     |
| NM_144913                                                                                                                                                          | Bdin3         | bin3, bicoid-interacting 3, homolog (Drosophila)                        | 5   | 138,223,134 | 138,227,929 | 345                     | in gene                   | 5.00     |
| NM_001005426                                                                                                                                                       | Zcwpw1        | zinc finger, CW type with PWWP domain 1                                 | 5   | 138,229,103 | 138,263,849 | -1519                   | upstream                  | 5.00     |
| NM_001044703,<br>NM_001044704,<br>NM_001044705,<br>NM_011757                                                                                                       | Zscan21       | zinc finger and SCAN domain containing 21                               | 5   | 138,558,133 | 138,575,489 | 22123                   | downstream                | 5.00     |
| NM_019747                                                                                                                                                          | Zfp113        | zinc finger protein 113                                                 | 5   | 138,582,665 | 138,596,916 | 16660                   | downstream                | 5.00     |
| XM_001000706,<br>XM_357518                                                                                                                                         | EG384244      | predicted gene, EG384244                                                | 5   | 139,295,436 | 139,297,573 | 1316                    | in gene                   | 5.00     |
| NM_008923                                                                                                                                                          | Prkar1b       | protein kinase, cAMP dependent regulatory, type I beta                  | 5   | 139,493,260 | 139,605,645 | 98109, 80253            | in gene, in gene          | 5.50     |
| NM_172723                                                                                                                                                          | Centa1        | centaurin, alpha 1                                                      | 5   | 139,747,830 | 139,782,273 | 21697                   | in gene                   | 6.00     |

| Accession No.                 | Symbol        | Gene Title                                                                           | Chr | Gene Start  | Gene End    | Interval Dists to Start | Interval Pos        | Avg Peak |
|-------------------------------|---------------|--------------------------------------------------------------------------------------|-----|-------------|-------------|-------------------------|---------------------|----------|
| NM_013702                     | Uncx4.1       | Unc4.1 homeobox (C. elegans)                                                         | 5   | 140,019,863 | 140,024,133 | -3511                   | upstream            | 5.00     |
| NM_174850                     | Mical12       | MICAL-like 2                                                                         | 5   | 140,182,650 | 140,208,788 | 31380                   | downstream          | 6.00     |
| NM_026748                     | Ints1         | integrator complex subunit 1                                                         | 5   | 140,227,237 | 140,251,607 | -2025                   | upstream            | 5.00     |
| NM_144914                     | BC019731      | cDNA sequence BC019731                                                               | 5   | 140,280,906 | 140,290,196 | -7036                   | upstream            | 7.00     |
| NM_025604                     | 1810042K04Rik | RIKEN cDNA 1810042K04 gene                                                           | 5   | 140,299,548 | 140,302,797 | 5565                    | downstream          | 7.00     |
| NM_010752                     | Mad11l        | mitotic arrest deficient 1-like 1                                                    | 5   | 140,484,643 | 140,797,506 | 246754                  | in gene             | 6.00     |
| XM_144611,<br>XM_917042       | EG231836      | predicted gene, EG231836                                                             | 5   | 140,921,599 | 140,969,093 | 50849                   | downstream          | 4.00     |
| NM_021528                     | Chst12        | carbohydrate sulfotransferase 12                                                     | 5   | 140,981,582 | 141,001,192 | -9134                   | upstream            | 4.00     |
| NM_028833                     | lqce          | IQ motif containing E                                                                | 5   | 141,139,459 | 141,178,332 | -6468                   | upstream            | 7.00     |
| NM_172724,<br>NM_181066       | AA881470      | EST AA881470                                                                         | 5   | 141,180,977 | 141,195,288 | 3823                    | in gene             | 7.00     |
| NM_178702                     | D930005D10Rik | RIKEN cDNA D930005D10 gene                                                           | 5   | 142,960,795 | 143,027,031 | 1047                    | in gene             | 7.00     |
| NM_146257                     | Slc29a4       | solute carrier family 29 (nucleoside transporters), member 4                         | 5   | 143,178,055 | 143,198,443 | -359                    | upstream            | 6.00     |
| NM_001033312                  | Fbx18         | F-box and leucine-rich repeat protein 18                                             | 5   | 143,633,468 | 143,656,896 | 29504                   | downstream          | 5.00     |
| XR_035132,<br>XR_035135       | D430018E03Rik | RIKEN cDNA D430018E03 gene                                                           | 5   | 143,635,756 | 143,640,052 | 12660                   | downstream          | 5.00     |
| XM_001478588,<br>XM_001478596 | LOC100042605  | hypothetical protein LOC100042605                                                    | 5   | 143,926,458 | 143,927,420 | 284                     | in gene             | 5.00     |
| NM_001045482,<br>NM_021326    | Rbak          | RB-associated KRAB repressor                                                         | 5   | 143,933,867 | 143,942,422 | 15286                   | downstream          | 5.00     |
| NM_177681                     | Zfp12         | zinc finger protein 12                                                               | 5   | 143,996,887 | 144,009,649 | 22185                   | downstream          | 7.00     |
| NM_017467                     | Zfp316        | zinc finger protein 316                                                              | 5   | 144,013,400 | 144,031,618 | 12546                   | in gene             | 7.00     |
| NM_172726                     | E130309D02Rik | RIKEN cDNA E130309D02 gene                                                           | 5   | 144,062,887 | 144,077,039 | 1135                    | in gene             | 6.00     |
| NM_028379                     | Zdhhc4        | zinc finger, DHHC domain containing 4                                                | 5   | 144,078,170 | 144,090,905 | 15001                   | downstream          | 6.00     |
| NM_011182                     | Pscd3         | pleckstrin homology, Sec7 and coiled-coil domains 3                                  | 5   | 144,383,403 | 144,471,115 | 9077, 50965             | in gene, in gene    | 6.00     |
| NM_029749                     | Usp42         | ubiquitin specific peptidase 42                                                      | 5   | 144,471,194 | 144,493,149 | -419                    | upstream            | 4.00     |
| NM_133735                     | Ptcd1         | pentatricopeptide repeat domain 1                                                    | 5   | 145,908,400 | 145,927,891 | 1651                    | in gene             | 4.00     |
| NM_178576                     | Cpsf4         | cleavage and polyadenylation specific factor 4                                       | 5   | 145,928,093 | 145,942,909 | -1853                   | upstream            | 4.00     |
| NM_028774                     | Rnf6          | ring finger protein (C3H2C3 type) 6                                                  | 5   | 147,020,780 | 147,033,013 | -9547                   | upstream            | 5.00     |
| NM_153599                     | Cdk8          | cyclin-dependent kinase 8                                                            | 5   | 147,043,251 | 147,114,450 | -691, 29581             | upstream, in gene   | 13.00    |
| NM_080795                     | Lnx2          | ligand of numb-protein X 2                                                           | 5   | 147,828,679 | 147,888,105 | -12                     | upstream            | 8.00     |
| XM_001473557                  | LOC100039805  | hypothetical protein LOC100039805                                                    | 5   | 148,222,674 | 148,234,199 | 19982                   | downstream          | 8.00     |
| NM_028291                     | Pan3          | PAN3 polyA specific ribonuclease subunit homolog (S. cerevisiae)                     | 5   | 148,242,465 | 148,360,072 | 191                     | in gene             | 8.00     |
| NM_010228                     | Flt1          | FMS-like tyrosine kinase 1                                                           | 5   | 148,373,772 | 148,537,564 | 160364                  | in gene             | 6.00     |
| NM_007513                     | Slc7a1        | solute carrier family 7 (cationic amino acid transporter, y+ system), member 1       | 5   | 149,139,902 | 149,211,455 | 38335                   | in gene             | 5.00     |
| NM_011908                     | Ubl3          | ubiquitin-like 3                                                                     | 5   | 149,316,207 | 149,364,364 | -84                     | upstream            | 6.00     |
| NM_153572                     | Katna1        | katanin p60 subunit A-like 1                                                         | 5   | 149,687,642 | 149,740,194 | 11938, -110             | in gene, upstream   | 8.00     |
| NM_027519                     | 6330406115Rik | RIKEN cDNA 6330406115 gene                                                           | 5   | 150,214,381 | 150,234,278 | 16675                   | in gene             | 5.00     |
| NM_080468                     | Rxfp2         | relaxin/insulin-like family peptide receptor 2                                       | 5   | 150,821,250 | 150,883,911 | 15358                   | in gene             | 5.00     |
| NM_133898                     | B230342M21Rik | RIKEN cDNA B230342M21 gene                                                           | 5   | 151,374,219 | 151,397,075 | -2093                   | upstream            | 6.00     |
| NM_011134                     | Pon1          | paraoxonase 1                                                                        | 6   | 5,118,105   | 5,143,824   | 4208                    | in gene             | 5.00     |
| XM_287555,<br>XM_983072       | Thsd7a        | thrombospondin, type I, domain containing 7A                                         | 6   | 12,265,952  | 12,699,188  | 146788                  | in gene             | 6.00     |
| NM_023626                     | Ing3          | inhibitor of growth family, member 3                                                 | 6   | 21,899,615  | 21,926,037  | 609, 24353              | in gene, in gene    | 5.50     |
| NM_053116                     | Wnt16         | wingless-related MMTV integration site 16                                            | 6   | 22,238,230  | 22,248,522  | 1162                    | in gene             | 5.00     |
| NM_028900                     | Gcc1          | golgi-related coil 1                                                                 | 6   | 28,366,691  | 28,371,724  | -2532                   | upstream            | 7.00     |
| NM_007480                     | Arf5          | ADP-ribosylation factor 5                                                            | 6   | 28,373,640  | 28,376,499  | 616                     | in gene             | 7.00     |
| NM_019569                     | Fscn3         | fascin homolog 3, actin-bundling protein, testicular (Strongylocentrotus purpuratus) | 6   | 28,377,901  | 28,388,622  | -3645                   | upstream            | 7.00     |
| NM_001081185                  | Flnc          | filamin C, gamma (actin binding protein 280)                                         | 6   | 29,383,153  | 29,411,888  | 34991                   | downstream          | 6.00     |
| NM_025381                     | Atp6v1f       | ATPase, H+ transporting, lysosomal V1 subunit F                                      | 6   | 29,417,783  | 29,420,509  | 361                     | in gene             | 6.00     |
| XM_001000046,<br>XM_988597    | EG668210      | predicted gene, EG668210                                                             | 6   | 29,421,527  | 29,423,465  | -3383                   | upstream            | 6.00     |
| NM_001029985                  | Crim2         | cysteine rich BMP regulator 2 (chordin like)                                         | 6   | 29,432,036  | 29,457,937  | 21777                   | in gene             | 6.00     |
| NM_009459                     | Ube2h         | ubiquitin-conjugating enzyme E2H                                                     | 6   | 30,162,965  | 30,254,345  | 68601                   | in gene             | 6.00     |
| XR_035177,<br>XR_035288       | AB041803      | cDNA sequence AB041803                                                               | 6   | 31,115,508  | 31,168,433  | 35089                   | in gene             | 6.00     |
| XM_001472135,<br>XM_001477679 | LOC620104     | hypothetical protein LOC620104                                                       | 6   | 31,652,245  | 31,796,531  | 37315                   | in gene             | 6.00     |
| NM_175750                     | Plxna4        | plexin A4                                                                            | 6   | 32,100,122  | 32,538,192  | 408320, 91936           | in gene, in gene    | 7.00     |
| NM_009148                     | Exoc4         | exocyst complex component 4                                                          | 6   | 33,199,150  | 33,922,943  | 618338                  | in gene             | 5.00     |
| NM_001025573                  | 2010107G12Rik | RIKEN cDNA 2010107G12 gene                                                           | 6   | 34,895,294  | 34,927,999  | 25567                   | in gene             | 6.00     |
| NM_178661                     | Creb3l2       | cAMP responsive element binding protein 3-like 2                                     | 6   | 37,281,021  | 37,392,139  | 87179                   | in gene             | 9.00     |
| NM_177200                     | Svopl         | SV2 related protein homolog (rat)-like                                               | 6   | 37,965,273  | 37,996,996  | 10500                   | in gene             | 5.00     |
| NM_080467                     | Atp6v0a4      | ATPase, H+ transporting, lysosomal V0 subunit A4                                     | 6   | 37,998,483  | 38,074,574  | -7442                   | upstream            | 5.00     |
| NM_172477                     | Dennd2a       | DENN/MADD domain containing 2A                                                       | 6   | 39,412,377  | 39,507,833  | 101113, 74777           | downstream, in gene | 6.00     |
| NM_001010930,<br>NM_010270    | Mrps33        | mitochondrial ribosomal protein S33                                                  | 6   | 39,751,803  | 39,760,935  | 55                      | in gene             | 6.00     |
| NM_001004182                  | EG434008      | predicted gene, EG434008                                                             | 6   | 40,060,252  | 40,198,352  | -908                    | upstream            | 6.00     |
| NM_175408                     | Tmem139       | transmembrane protein 139                                                            | 6   | 42,211,958  | 42,214,552  | 2826                    | downstream          | 5.00     |
| NM_007610                     | Casp2         | caspase 2                                                                            | 6   | 42,215,038  | 42,232,495  | -254                    | upstream            | 5.00     |
| NM_013861                     | Tpk1          | thiamine pyrophosphokinase                                                           | 6   | 43,295,006  | 43,616,174  | 82798, -2               | in gene, upstream   | 6.50     |



| Accession No.                            | Symbol        | Gene Title                                                        | Chr | Gene Start  | Gene End    | Interval Dists to Start | Interval Pos            | Avg Peak |
|------------------------------------------|---------------|-------------------------------------------------------------------|-----|-------------|-------------|-------------------------|-------------------------|----------|
| NM_001004357,<br>NM_025771               | Cntnap2       | contactin associated protein-like 2                               | 6   | 45,010,087  | 47,251,368  | 2240593                 | in gene                 | 4.00     |
| XR_030568,<br>XR_031849                  | A230106D06Rik | RIKEN cDNA A230106D06 gene                                        | 6   | 47,893,170  | 47,903,153  | 9998                    | downstream              | 7.00     |
| NM_178898                                | AI894139      | expressed sequence AI894139                                       | 6   | 47,903,446  | 47,915,296  | -278                    | upstream                | 7.00     |
| XM_001474507,<br>XM_904306,<br>XM_973126 | Zfp746        | zinc finger protein 746                                           | 6   | 48,012,394  | 48,070,426  | 34266                   | in gene                 | 8.00     |
| NM_020589                                | Zfp467        | zinc finger protein 467                                           | 6   | 48,387,585  | 48,395,606  | 1590                    | in gene                 | 5.00     |
| NM_173428                                | Sspo          | SCO-spondin                                                       | 6   | 48,398,228  | 48,451,234  | -4212                   | upstream                | 5.00     |
| NM_001081273                             | 1600015110Rik | RIKEN cDNA 1600015110 gene                                        | 6   | 48,879,892  | 48,883,686  | 10620                   | downstream              | 4.00     |
| NM_026629                                | 2410066E13Rik | RIKEN cDNA 2410066E13 gene                                        | 6   | 54,631,766  | 54,650,400  | 23738                   | downstream              | 7.00     |
| NM_172729                                | Nod1          | nucleotide-binding oligomerization domain containing 1            | 6   | 54,873,943  | 54,922,405  | -59                     | upstream                | 7.00     |
| XM_132538,<br>XM_907872                  | 5830411G16Rik | RIKEN cDNA 5830411G16 gene                                        | 6   | 56,664,832  | 56,711,910  | 544                     | in gene                 | 6.00     |
| NM_146168                                | AW146242      | expressed sequence AW146242                                       | 6   | 57,702,258  | 57,775,119  | 28575                   | in gene                 | 5.00     |
| NM_009075                                | Rpia          | ribose 5-phosphate isomerase A                                    | 6   | 70,715,714  | 70,742,169  | 2761                    | in gene                 | 6.00     |
| NM_024288                                | Rmnd5a        | required for meiotic nuclear division 5 homolog A (S. cerevisiae) | 6   | 71,341,245  | 71,390,482  | -142                    | upstream                | 9.00     |
| NM_009088                                | Rpo1-4        | RNA polymerase 1-4                                                | 6   | 71,859,067  | 71,929,354  | 61661                   | in gene                 | 4.00     |
| NM_147779                                | Sftpb         | surfactant associated protein B                                   | 6   | 72,253,239  | 72,264,364  | 4329                    | in gene                 | 6.00     |
| NM_019802                                | Ggcx          | gamma-glutamyl carboxylase                                        | 6   | 72,364,327  | 72,380,701  | -87, 24761              | upstream,<br>downstream | 6.50     |
| NM_145569                                | Mat2a         | methionine adenosyltransferase II, alpha                          | 6   | 72,382,793  | 72,389,552  | 464                     | in gene                 | 7.00     |
| XM_355785,<br>XM_911211                  | Sh2d6         | SH2 domain containing 6                                           | 6   | 72,463,646  | 72,470,621  | 7981                    | downstream              | 5.00     |
| NM_013586                                | Loxl3         | lysyl oxidase-like 3                                              | 6   | 82,984,218  | 83,002,558  | 19116                   | downstream              | 5.00     |
| NM_019752                                | Htra2         | HtrA serine peptidase 2                                           | 6   | 83,001,276  | 83,004,565  | 1231                    | in gene                 | 5.00     |
| NM_007517                                | Up1           | ancient ubiquitous protein                                        | 6   | 83,004,647  | 83,007,676  | -1313                   | upstream                | 5.00     |
| NM_010692                                | Lbx2          | ladybird homeobox homolog 2 (Drosophila)                          | 6   | 83,036,359  | 83,038,235  | -7623                   | upstream                | 6.00     |
| NR_002871                                | Vax2os2       | Vax2 opposite strand transcript 2                                 | 6   | 83,642,800  | 83,662,195  | 3315                    | in gene                 | 6.00     |
| NR_002873                                | Vax2os1       | Vax2 opposite strand transcript 1                                 | 6   | 83,652,120  | 83,660,926  | 2046                    | in gene                 | 6.00     |
| NM_011912                                | Vax2          | ventral anterior homeobox containing gene 2                       | 6   | 83,661,258  | 83,688,298  | -2378                   | upstream                | 6.00     |
| XM_001479937,<br>XM_989266               | LOC676366     | hypothetical protein LOC676366                                    | 6   | 83,864,352  | 83,865,890  | -6110                   | upstream                | 6.00     |
| NM_008717                                | Zfml          | zinc finger, matrin-like                                          | 6   | 83,864,361  | 83,936,855  | 7639                    | in gene                 | 6.00     |
| NM_001003955,<br>NM_177466               | Rab11fip5     | RAB11 family interacting protein 5 (class I)                      | 6   | 85,284,956  | 85,324,628  | 5348                    | in gene                 | 7.00     |
| NM_053096                                | Cml2          | camello-like 2                                                    | 6   | 85,815,416  | 85,819,131  | 12080                   | downstream              | 5.00     |
| NM_031199                                | Tgfa          | transforming growth factor alpha                                  | 6   | 86,145,410  | 86,225,151  | -114                    | upstream                | 6.00     |
| NM_025823                                | Pcyox1        | prenylcysteine oxidase 1                                          | 6   | 86,336,851  | 86,347,114  | -7238                   | upstream                | 5.00     |
| NM_011585                                | Tia1          | cytotoxic granule-associated RNA binding protein 1                | 6   | 86,354,308  | 86,383,399  | 44                      | in gene                 | 5.00     |
| NM_011865                                | Pcbp1         | poly(rC) binding protein 1                                        | 6   | 86,474,488  | 86,476,161  | -543                    | upstream                | 8.00     |
| NM_026414                                | Asprv1        | aspartic peptidase, retroviral-like 1                             | 6   | 86,578,168  | 86,579,704  | 8584                    | downstream              | 5.00     |
| NM_001037727,<br>NM_175476               | Arhgap25      | Rho GTPase activating protein 25                                  | 6   | 87,409,379  | 87,483,229  | 60989, 58109            | in gene, in gene        | 6.00     |
| NM_024251                                | 2010301N04Rik | RIKEN cDNA 2010301N04 gene                                        | 6   | 87,578,423  | 87,622,141  | 35581                   | in gene                 | 6.00     |
| NM_133933                                | Rpn1          | ribophorin I                                                      | 6   | 88,034,510  | 88,055,298  | 16226, 28210            | in gene, downstream     | 6.00     |
| NM_023060                                | Eefsec        | eukaryotic elongation factor, selenocysteine-tRNA-specific        | 6   | 88,207,328  | 88,396,533  | 62021                   | in gene                 | 5.00     |
| NM_153162                                | Txnrd3        | thioredoxin reductase 3                                           | 6   | 89,593,982  | 89,625,523  | 10754                   | in gene                 | 6.00     |
| NM_023184                                | Kif15         | Kruppel-like factor 15                                            | 6   | 90,412,620  | 90,425,203  | 1060, 4772              | in gene, in gene        | 5.00     |
| NM_001081146                             | Prickle2      | prickle-like 2 (Drosophila)                                       | 6   | 92,325,940  | 92,656,178  | 291554                  | in gene                 | 10.00    |
| NM_008377                                | Lrig1         | leucine-rich repeats and immunoglobulin-like domains 1            | 6   | 94,554,523  | 94,650,139  | 72179                   | in gene                 | 5.00     |
| NM_011507                                | Sucg2         | succinate-Coenzyme A ligase, GDP-forming, beta subunit            | 6   | 95,424,140  | 95,668,782  | 236814                  | in gene                 | 5.00     |
| NM_177233                                | C130034I18Rik | RIKEN cDNA C130034I18 gene                                        | 6   | 96,781,203  | 97,010,405  | 33210                   | in gene                 | 5.00     |
| NM_001081111                             | Tmf1          | TATA element modulatory factor 1                                  | 6   | 97,105,260  | 97,129,118  | -690                    | upstream                | 5.00     |
| NM_011666                                | Ube1c         | ubiquitin-activating enzyme E1C                                   | 6   | 97,134,022  | 97,155,337  | 25529                   | downstream              | 5.00     |
| XM_001480618                             | LOC100043692  | similar to metalloproteinase                                      | 6   | 97,840,202  | 97,840,567  | 8455                    | downstream              | 13.00    |
| XM_284224,<br>XM_916337                  | Gm765         | gene model 765, (NCBI)                                            | 6   | 98,188,071  | 98,292,666  | 68453                   | in gene                 | 4.00     |
| NM_053202                                | Foxp1         | forkhead box P1                                                   | 6   | 98,880,084  | 99,113,012  | 233204                  | downstream              | 6.00     |
| NM_018884                                | Pdzrn3        | PDZ domain containing RING finger 3                               | 6   | 101,099,608 | 101,327,891 | 96291, -2717            | in gene, upstream       | 6.50     |
| NM_011498                                | Bhlhb2        | basic helix-loop-helix domain containing, class B2                | 6   | 108,610,623 | 108,616,919 | 433                     | in gene                 | 5.00     |
| NM_133923                                | Ttll3         | tubulin tyrosine ligase-like family, member 3                     | 6   | 113,347,752 | 113,364,558 | 20237                   | downstream              | 6.00     |
| XM_132830,<br>XM_924644                  | Rpusd3        | RNA pseudouridylylase synthase domain containing 3                | 6   | 113,365,313 | 113,369,334 | 1345                    | in gene                 | 6.00     |
| NM_178373                                | Cidec         | cell death-inducing DFFA-like effector c                          | 6   | 113,374,630 | 113,385,749 | 17760                   | downstream              | 6.00     |
| NM_172161                                | Irak2         | interleukin-1 receptor-associated kinase 2                        | 6   | 113,588,497 | 113,644,745 | 58687                   | downstream              | 6.00     |
| NM_001033463                             | Tatdn2        | TatD DNase domain containing 2                                    | 6   | 113,647,493 | 113,661,062 | -309                    | upstream                | 6.00     |
| NM_028835                                | Atg7          | autophagy-related 7 (yeast)                                       | 6   | 114,593,143 | 114,809,954 | 81833                   | in gene                 | 6.00     |
| NM_177683                                | Vgll4         | vestigial like 4 (Drosophila)                                     | 6   | 114,812,108 | 114,871,770 | 47290                   | in gene                 | 6.00     |
| NM_138311                                | H1foo         | H1 histone family, member O, oocyte-specific                      | 6   | 115,894,957 | 115,900,251 | 10659                   | downstream              | 6.00     |
| NM_026376                                | Plxnd1        | plexin D1                                                         | 6   | 115,905,758 | 115,944,982 | 39366                   | downstream              | 6.00     |

| Accession No.                                       | Symbol        | Gene Title                                                                    | Chr | Gene Start  | Gene End    | Interval Dists to Start | Interval Pos     | Avg Peak |
|-----------------------------------------------------|---------------|-------------------------------------------------------------------------------|-----|-------------|-------------|-------------------------|------------------|----------|
| NM_033648                                           | Fxyd4         | FXYD domain-containing ion transport regulator 4                              | 6   | 117,883,577 | 117,887,353 | -1975                   | upstream         | 6.00     |
| XM_001479962,<br>XM_986257                          | Rasgef1a      | RasGEF domain family, member 1A                                               | 6   | 117,960,827 | 118,041,565 | 66693                   | in gene          | 5.00     |
| NM_194339                                           | Bms1          | BMS1 homolog, ribosome assembly protein (yeast)                               | 6   | 118,333,399 | 118,369,435 | -133                    | upstream         | 9.00     |
| NM_028335                                           | Zfp248        | zinc finger protein 248                                                       | 6   | 118,377,337 | 118,405,524 | 35956                   | downstream       | 9.00     |
| NM_053204,<br>NM_178085                             | Erc1          | ELKS/RAB6-interacting/CAST family member 1                                    | 6   | 119,520,814 | 119,798,168 | -72                     | upstream         | 10.00    |
| NM_016970                                           | Klrg1         | killer cell lectin-like receptor subfamily G, member 1                        | 6   | 122,220,614 | 122,232,851 | 2979                    | in gene          | 6.00     |
| NM_008479                                           | Lag3          | lymphocyte-activation gene 3                                                  | 6   | 124,854,379 | 124,861,723 | -6629                   | upstream         | 6.00     |
| NM_026988                                           | Ptms          | parathymosin                                                                  | 6   | 124,863,699 | 124,867,949 | -403                    | upstream         | 6.00     |
| NM_010736                                           | Ltbr          | lymphotoxin B receptor                                                        | 6   | 125,256,594 | 125,263,872 | 4416                    | in gene          | 5.00     |
| NM_011324                                           | Scnn1a        | sodium channel, nonvoltage-gated, type I, alpha                               | 6   | 125,271,871 | 125,294,961 | 6817                    | in gene          | 5.00     |
| NM_011609                                           | Tnfrsf1a      | tumor necrosis factor receptor superfamily, member 1a                         | 6   | 125,299,773 | 125,312,503 | 10291                   | in gene          | 7.00     |
| NM_198604                                           | Pleckhg6      | pleckstrin homology domain containing, family G (with RhoGef domain) member 6 | 6   | 125,312,669 | 125,330,522 | 20458                   | downstream       | 7.00     |
| NM_007657                                           | Cd9           | CD9 antigen                                                                   | 6   | 125,410,284 | 125,444,773 | 25813                   | in gene          | 6.00     |
| NM_011708                                           | Vwf           | Von Willebrand factor homolog                                                 | 6   | 125,502,981 | 125,636,695 | 62491, 128091           | in gene, in gene | 6.50     |
| NM_010595                                           | Kcna1         | potassium voltage-gated channel, shaker-related subfamily, member 1           | 6   | 126,586,481 | 126,595,819 | -1541                   | upstream         | 5.00     |
| XM_917767,<br>XM_990939                             | EG640703      | predicted gene, EG640703                                                      | 6   | 127,231,839 | 127,287,473 | 1537                    | in gene          | 6.00     |
| NM_007376                                           | Pzp           | pregnancy zone protein                                                        | 6   | 128,433,585 | 128,476,738 | 24418                   | in gene          | 6.00     |
| NM_153590                                           | Klre1         | killer cell lectin-like receptor family E member 1                            | 6   | 129,527,911 | 129,535,845 | -7127                   | upstream         | 5.00     |
| XM_001480602                                        | 2700089E24Rik | RIKEN cDNA 2700089E24 gene                                                    | 6   | 133,054,046 | 133,060,882 | 1682                    | in gene          | 5.00     |
| NM_026345                                           | Mansc1        | MANSC domain containing 1                                                     | 6   | 134,559,228 | 134,582,506 | -8806                   | upstream         | 4.00     |
| NM_026371                                           | Loh12cr1      | loss of heterozygosity, 12, chromosomal region 1 homolog (human)              | 6   | 134,590,999 | 134,661,188 | 313                     | in gene          | 4.00     |
| XM_355823,<br>XM_905672                             | Apold1        | apolipoprotein L domain containing 1                                          | 6   | 134,932,019 | 134,936,854 | -435                    | upstream         | 5.00     |
| NM_010128                                           | Emp1          | epithelial membrane protein 1                                                 | 6   | 135,312,949 | 135,333,191 | 6907                    | in gene          | 5.00     |
| XM_001481171                                        | LOC100043893  | similar to ribosomal protein L36a                                             | 6   | 136,437,249 | 136,437,727 | 9503                    | downstream       | 4.00     |
| NM_145067                                           | Gucy2c        | guanylate cyclase 2c                                                          | 6   | 136,645,806 | 136,730,263 | 62359                   | in gene          | 5.00     |
| NM_011216                                           | Ptpro         | protein tyrosine phosphatase, receptor type, O                                | 6   | 137,200,986 | 137,411,754 | 110174                  | in gene          | 4.00     |
| XM_908334,<br>XM_979562                             | Etnk1         | ethanolamine kinase 1                                                         | 6   | 143,084,110 | 143,157,066 | 40114                   | in gene          | 6.00     |
| XM_001479070                                        | LOC100042879  | hypothetical protein LOC100042879                                             | 6   | 145,491,811 | 145,562,839 | 20311                   | in gene          | 5.00     |
| NM_027760                                           | Rassf8        | Ras association (RalGDS/AF-6) domain family 8                                 | 6   | 145,756,903 | 145,766,104 | -3927                   | upstream         | 7.00     |
| NM_024469                                           | Bhlhb3        | basic helix-loop-helix domain containing, class B3                            | 6   | 145,811,257 | 145,813,860 | -396                    | upstream         | 7.00     |
| NM_025620                                           | 2210417D09Rik | RIKEN cDNA 2210417D09 gene                                                    | 6   | 146,981,059 | 146,982,040 | -5155                   | upstream         | 7.00     |
| NM_198967                                           | Tmtc1         | transmembrane and tetratricopeptide repeat containing 1                       | 6   | 148,185,194 | 148,392,874 | 196085                  | in gene          | 5.00     |
| NM_019643                                           | Tera          | teratocarcinoma expressed, serine rich                                        | 6   | 148,869,579 | 148,894,954 | 21514                   | in gene          | 5.00     |
| XM_132975,<br>XM_901291,<br>XM_921354,<br>XM_921360 | C730024G19Rik | RIKEN cDNA C730024G19 gene                                                    | 6   | 149,106,099 | 149,137,234 | -1054                   | upstream         | 6.00     |
| NM_011102                                           | Prkcc         | protein kinase C, gamma                                                       | 7   | 3,303,658   | 3,331,005   | 28710                   | downstream       | 5.00     |
| NM_133189                                           | Cacng7        | calcium channel, voltage-dependent, gamma subunit 7                           | 7   | 3,333,055   | 3,367,810   | -687                    | upstream         | 5.00     |
| NM_001001454,<br>NM_021324                          | Ttyh1         | tweety homolog 1 (Drosophila)                                                 | 7   | 4,071,188   | 4,086,947   | 8012                    | in gene          | 5.00     |
| NM_172736                                           | Leng8         | leukocyte receptor cluster (LRC) member 8                                     | 7   | 4,088,658   | 4,099,775   | -9458                   | upstream         | 5.00     |
| NM_001003920                                        | Brsk1         | BR serine/threonine kinase 1                                                  | 7   | 4,642,530   | 4,667,599   | 14302                   | in gene          | 6.00     |
| NM_177887                                           | BC022651      | cDNA sequence BC022651                                                        | 7   | 4,658,434   | 4,676,853   | 20021                   | downstream       | 6.00     |
| NM_170759                                           | Zfp628        | zinc finger protein 628                                                       | 7   | 4,870,378   | 4,873,600   | 7078                    | downstream       | 5.00     |
| NM_201355                                           | Nat14         | N-acetyltransferase 14                                                        | 7   | 4,874,217   | 4,876,604   | 3239                    | downstream       | 5.00     |
| NM_173008                                           | A430110N23Rik | RIKEN cDNA A430110N23 gene                                                    | 7   | 4,877,446   | 4,896,399   | 10                      | in gene          | 5.00     |
| NM_133204                                           | Zfp371        | zinc finger protein 371                                                       | 7   | 6,173,880   | 6,191,014   | 22312                   | downstream       | 5.00     |
| XM_892523,<br>XM_912420                             | EG627821      | predicted gene, EG627821                                                      | 7   | 6,204,312   | 6,233,463   | -8120                   | upstream         | 5.00     |
| NM_001025163,<br>NM_177888                          | Zfp78         | zinc finger protein 78                                                        | 7   | 6,316,015   | 6,335,315   | 20001                   | downstream       | 6.00     |
| NM_175247                                           | Zfp28         | zinc finger protein 28                                                        | 7   | 6,336,037   | 6,348,462   | -21                     | upstream         | 6.00     |
| NM_021323                                           | Usp29         | ubiquitin specific peptidase 29                                               | 7   | 6,683,452   | 6,919,931   | 120708                  | in gene          | 5.00     |
| NM_011334                                           | Clcn4-2       | chloride channel 4-2                                                          | 7   | 7,235,027   | 7,252,222   | 2510                    | in gene          | 5.00     |
| NM_007770                                           | Crx           | cone-rod homeobox containing gene                                             | 7   | 16,451,298  | 16,465,243  | 11430                   | in gene          | 4.00     |
| NM_009156                                           | Sepw1         | selenoprotein W, muscle 1                                                     | 7   | 16,502,557  | 16,507,720  | 2568, 136               | in gene, in gene | 5.50     |
| NM_148946                                           | Slc8a2        | solute carrier family 8 (sodium/calcium exchanger), member 2                  | 7   | 16,715,649  | 16,745,860  | 23759                   | in gene          | 7.00     |
| NM_008627                                           | Mrg2          | myeloid ecotropic viral integration site-related gene 2                       | 7   | 16,760,729  | 16,771,853  | 15783                   | downstream       | 4.00     |

| Accession No.              | Symbol        | Gene Title                                                                         | Chr | Gene Start | Gene End   | Interval Dists to Start | Interval Pos              | Avg Peak |
|----------------------------|---------------|------------------------------------------------------------------------------------|-----|------------|------------|-------------------------|---------------------------|----------|
| NM_027883                  | Dhx34         | DEAH (Asp-Glu-Ala-His) box polypeptide 34                                          | 7   | 16,782,572 | 16,807,342 | 30830                   | downstream                | 4.00     |
| NM_133234                  | Bbc3          | Bcl-2 binding component 3                                                          | 7   | 16,894,987 | 16,903,683 | 7669                    | in gene                   | 5.00     |
| NM_019748                  | Sae1          | SUMO1 activating enzyme subunit 1                                                  | 7   | 16,912,403 | 16,973,134 | 70478                   | downstream                | 5.00     |
| NM_009201                  | Slc1a5        | solute carrier family 1 (neutral amino acid transporter), member 5                 | 7   | 17,366,695 | 17,383,623 | 17273                   | downstream                | 6.00     |
| NM_178900                  | Prkd2         | protein kinase D2                                                                  | 7   | 17,428,414 | 17,455,810 | 32130                   | downstream                | 10.00    |
| NM_009499                  | Vasp          | vasodilator-stimulated phosphoprotein                                              | 7   | 19,843,066 | 19,858,496 | 2848                    | in gene                   | 7.00     |
| NM_177691                  | C79127        | expressed sequence C79127                                                          | 7   | 19,862,156 | 19,865,398 | 9750                    | downstream                | 7.00     |
| NM_001025364,<br>NM_013648 | Rtn2          | reticulon 2 (Z-band associated protein)                                            | 7   | 19,868,016 | 19,881,509 | 13360                   | in gene                   | 6.00     |
|                            | Trsp          | tRNA phosphoserine                                                                 | 7   | 19,886,593 | 19,886,678 | -5217, 8991             | upstream,<br>downstream   | 6.00     |
| NM_008036                  | Fosb          | FBJ osteosarcoma oncogene B                                                        | 7   | 19,888,045 | 19,895,394 | 14018, -190             | downstream,<br>upstream   | 6.00     |
| XM_987344                  | D830036C21Rik | RIKEN cDNA D830036C21 gene                                                         | 7   | 19,905,466 | 19,927,574 | 31990                   | downstream                | 6.00     |
| NM_172279                  | Mark4         | MAP/microtubule affinity-regulating kinase 4                                       | 7   | 20,011,424 | 20,043,843 | 3555                    | in gene                   | 6.00     |
| NM_008990                  | Pvrl2         | poliovirus receptor-related 2                                                      | 7   | 20,302,010 | 20,334,818 | -942                    | upstream                  | 6.00     |
| NM_020486                  | Bcam          | basal cell adhesion molecule                                                       | 7   | 20,341,487 | 20,355,881 | 20121                   | downstream                | 6.00     |
| NM_033601                  | Bcl3          | B-cell leukemia/lymphoma 3                                                         | 7   | 20,393,811 | 20,408,064 | 32                      | in gene                   | 5.00     |
| NM_001045486               | Zfp180        | zinc finger protein 180                                                            | 7   | 24,866,963 | 24,892,234 | -115, 18237             | upstream, in gene         | 6.50     |
| NM_027732                  | Dmrtc2        | doublesex and mab-3 related transcription factor like family C2                    | 7   | 25,655,079 | 25,662,666 | 13961                   | downstream                | 6.00     |
| NM_010155                  | Erf           | Ets2 repressor factor                                                              | 7   | 26,027,579 | 26,035,684 | 2164                    | in gene                   | 6.00     |
| NM_177102                  | A830041P22Rik | RIKEN cDNA A830041P22 gene                                                         | 7   | 26,454,161 | 26,460,185 | -8903                   | upstream                  | 5.00     |
| NM_172148                  | BC028440      | cDNA sequence BC028440                                                             | 7   | 26,466,177 | 26,471,577 | 2911                    | in gene                   | 5.00     |
| NM_011577                  | Tgfb1         | transforming growth factor, beta 1                                                 | 7   | 26,472,021 | 26,490,015 | -2933                   | upstream                  | 5.00     |
| NM_009465                  | Axl           | AXL receptor tyrosine kinase                                                       | 7   | 26,542,292 | 26,573,560 | 17896                   | in gene                   | 5.00     |
| NM_007434                  | Akt2          | thymoma viral proto-oncogene 2                                                     | 7   | 28,390,877 | 28,424,473 | 26904                   | in gene                   | 5.00     |
| NM_030562                  | Lrfr1         | leucine rich repeat and fibronectin type III domain containing 1                   | 7   | 29,237,057 | 29,247,151 | 15215                   | downstream                | 4.00     |
| NM_022432                  | Sirt2         | sirtuin 2 (silent mating type information regulation 2, homolog 2) (S. cerevisiae) | 7   | 29,551,802 | 29,573,679 | 18854                   | in gene                   | 5.00     |
| NM_021894                  | Capn12        | calpain 12                                                                         | 7   | 29,666,676 | 29,678,604 | 5612                    | in gene                   | 5.00     |
| NM_021895                  | Actn4         | actinin alpha 4                                                                    | 7   | 29,678,273 | 29,747,299 | 75011, 49059            | downstream, in gene       | 5.50     |
| NM_001033525               | Kcnk6         | potassium inwardly-rectifying channel, subfamily K, member 6                       | 7   | 30,006,947 | 30,017,512 | 2760                    | in gene                   | 5.00     |
| NM_029887                  | Yif1b         | Yip1 interacting factor homolog B (S. cerevisiae)                                  | 7   | 30,023,372 | 30,032,548 | -8620                   | upstream                  | 5.00     |
| NM_001081028               | Sipa13        | signal-induced proliferation-associated 1 like 3                                   | 7   | 30,105,397 | 30,290,479 | 97039                   | in gene                   | 5.00     |
| NM_023750                  | Zfp84         | zinc finger protein 84                                                             | 7   | 30,553,571 | 30,566,438 | 2557, 10365             | in gene, in gene          | 5.50     |
| XM_001481066               | LOC100043794  | hypothetical protein LOC100043794                                                  | 7   | 30,569,017 | 30,569,823 | 5887                    | downstream                | 6.00     |
| NM_013705                  | Zfp30         | zinc finger protein 30                                                             | 7   | 30,569,809 | 30,579,559 | -5873                   | upstream                  | 6.00     |
| NM_152814                  | Zfp566        | zinc finger protein 566                                                            | 7   | 30,862,356 | 30,875,529 | -8215                   | upstream                  | 5.00     |
| NM_011981                  | Zfp260        | zinc finger protein 260                                                            | 7   | 30,880,095 | 30,892,633 | 3649                    | in gene                   | 5.00     |
| NM_029274                  | Wbp7          | WW domain binding protein 7                                                        | 7   | 31,353,874 | 31,373,745 | -271                    | upstream                  | 6.00     |
| NM_021397                  | Zbtb32        | zinc finger and BTB domain containing 32                                           | 7   | 31,374,700 | 31,377,961 | 3945                    | downstream                | 6.00     |
| NM_026815                  | Upk1a         | uroplakin 1A                                                                       | 7   | 31,388,111 | 31,397,753 | -663                    | upstream                  | 6.00     |
| NM_025628                  | Cox6b1        | cytochrome c oxidase, subunit VIb polypeptide 1                                    | 7   | 31,401,993 | 31,411,170 | 12754                   | downstream                | 6.00     |
| NM_020563                  | Apbh          | androgen-binding protein eta                                                       | 7   | 32,075,539 | 32,076,835 | 3                       | in gene                   | 5.00     |
| NM_025948                  | Lsm14a        | LSM14 homolog A (SCD6, S. cerevisiae)                                              | 7   | 35,129,738 | 35,174,559 | -273                    | upstream                  | 7.00     |
| NM_008820                  | Pepd          | peptidase D                                                                        | 7   | 35,691,920 | 35,829,727 | 32528                   | in gene                   | 5.00     |
| NM_178704                  | Dpy193        | dpy-19-like 3 (C. elegans)                                                         | 7   | 36,473,853 | 36,539,417 | -10055                  | upstream                  | 4.00     |
| XM_001002219,<br>XM_145521 | zfp507        | zinc finger protein 507                                                            | 7   | 36,557,362 | 36,623,898 | 74426                   | downstream                | 4.00     |
| XM_001480192               | LOC100043453  | hypothetical protein LOC100043453                                                  | 7   | 38,556,976 | 38,562,610 | -1401                   | upstream                  | 4.00     |
| NM_028166                  | 1600014C10Rik | RIKEN cDNA 1600014C10 gene                                                         | 7   | 38,968,835 | 38,982,581 | 93, 2093, 5917          | in gene, in gene, in gene | 6.00     |
| NM_177693                  | Lim2          | lens intrinsic membrane protein 2                                                  | 7   | 50,685,471 | 50,691,361 | 13998                   | downstream                | 4.00     |
| NM_024253                  | Nkg7          | natural killer cell group 7 sequence                                               | 7   | 50,692,508 | 50,693,616 | 6961                    | downstream                | 4.00     |
| NM_028849                  | Cldnd2        | claudin domain containing 2                                                        | 7   | 50,696,186 | 50,698,690 | 3283                    | downstream                | 4.00     |
| NM_026695                  | Etfb          | electron transferring flavoprotein, beta polypeptide                               | 7   | 50,699,513 | 50,713,152 | -44, 22471              | upstream,<br>downstream   | 5.50     |
| XM_355890,<br>XM_914186    | 2210412E05Rik | RIKEN cDNA 2210412E05 gene                                                         | 7   | 50,718,615 | 50,726,787 | 3369                    | in gene                   | 7.00     |
| XM_001474467,<br>XM_357746 | A230106M20Rik | RIKEN cDNA A230106M20 gene                                                         | 7   | 50,728,277 | 50,745,393 | 23409                   | downstream                | 7.00     |
| NM_001008549               | BC043301      | cDNA sequence BC043301                                                             | 7   | 50,814,176 | 50,830,831 | 3568                    | in gene                   | 6.00     |
| NM_010215                  | Il4i1         | interleukin 4 induced 1                                                            | 7   | 52,091,659 | 52,096,179 | 12293                   | downstream                | 9.00     |
| NM_001042655               | Tbc1d17       | TBC1 domain family, member 17                                                      | 7   | 52,096,146 | 52,104,449 | 497                     | in gene                   | 9.00     |
| NM_026270                  | Akt1s1        | AKT1 substrate 1 (proline-rich)                                                    | 7   | 52,104,597 | 52,110,780 | -645                    | upstream                  | 9.00     |
|                            | Mir707        | microRNA 707                                                                       | 7   | 52,105,068 | 52,105,140 | -1116                   | upstream                  | 9.00     |
| NM_029410                  | Bcl2l12       | BCL2-like 12 (proline rich)                                                        | 7   | 52,246,595 | 52,252,949 | -5035                   | upstream                  | 9.00     |
| NM_016849                  | Irf3          | interferon regulatory factor 3                                                     | 7   | 52,253,030 | 52,258,218 | 4954                    | in gene                   | 9.00     |
| XM_001003082,<br>XM_914632 | Prr12         | proline rich 12                                                                    | 7   | 52,282,933 | 52,308,251 | -677                    | upstream                  | 6.00     |
| NM_022999                  | Prrg2         | proline-rich Gla (G-carboxyglutamic acid) polypeptide 2                            | 7   | 52,308,974 | 52,317,022 | 8094                    | downstream                | 6.00     |
| NM_025533                  | Nosip         | nitric oxide synthase interacting protein                                          | 7   | 52,317,863 | 52,332,786 | -8935                   | upstream                  | 6.00     |

| Accession No.                                       | Symbol        | Gene Title                                                         | Chr | Gene Start  | Gene End    | Interval Dists to Start | Interval Pos       | Avg Peak |
|-----------------------------------------------------|---------------|--------------------------------------------------------------------|-----|-------------|-------------|-------------------------|--------------------|----------|
| NM_026555                                           | Rcn3          | reticulocalbin 3, EF-hand calcium binding domain                   | 7   | 52,338,283  | 52,347,533  | -3475                   | upstream           | 5.00     |
| NM_010189                                           | Fcgrt         | Fc receptor, IgG, alpha chain transporter                          | 7   | 52,348,434  | 52,358,462  | 7454, -1154             | in gene, upstream  | 6.00     |
| NM_175130                                           | Trpm4         | transient receptor potential cation channel, subfamily M, member 4 | 7   | 52,558,002  | 52,589,112  | 33581                   | downstream         | 4.00     |
| NM_001033243                                        | BC013491      | cDNA sequence BC013491                                             | 7   | 53,183,768  | 53,204,326  | -10024, -5304           | upstream, upstream | 6.00     |
| XM_001476814,<br>XM_001477482                       | Otog          | otogelin                                                           | 7   | 53,496,373  | 53,565,539  | 14795                   | in gene            | 4.00     |
| NM_010866                                           | Myod1         | myogenic differentiation 1                                         | 7   | 53,631,852  | 53,634,465  | -780                    | upstream           | 5.00     |
| NM_013643                                           | Ptpn5         | protein tyrosine phosphatase, non-receptor type 5                  | 7   | 54,333,172  | 54,389,054  | 47422                   | in gene            | 6.00     |
| NM_013808                                           | Csrp3         | cysteine and glycine-rich protein 3                                | 7   | 56,085,768  | 56,099,021  | 2813                    | in gene            | 5.00     |
| NM_146190                                           | Tubgcp5       | tubulin, gamma complex associated protein 5                        | 7   | 63,049,518  | 63,086,817  | -30                     | upstream           | 6.00     |
| NM_001038701,<br>NM_008071                          | Gabrb3        | gamma-aminobutyric acid (GABA-A) receptor, subunit beta 3          | 7   | 64,845,904  | 65,084,172  | 592                     | in gene            | 6.00     |
| NM_001039104,<br>NM_018752                          | Trpm1         | transient receptor potential cation channel, subfamily M, member 1 | 7   | 71,298,814  | 71,414,658  | 55938                   | in gene            | 7.00     |
|                                                     | Mirn211       | microRNA 211                                                       | 7   | 71,350,691  | 71,350,796  | 4061                    | downstream         | 7.00     |
| NM_172742                                           | BB128963      | expressed sequence BB128963                                        | 7   | 71,432,556  | 71,485,692  | 61129                   | downstream         | 5.00     |
| XM_885802,<br>XM_976717                             | Mttr15        | myotubularin related protein 15                                    | 7   | 71,491,644  | 71,518,978  | 25293                   | in gene            | 5.00     |
| NM_026483                                           | Mphosph10     | M-phase phosphoprotein 10 (U3 small nucleolar ribonucleoprotein)   | 7   | 71,521,427  | 71,537,122  | 66, -366                | in gene, upstream  | 5.50     |
| NM_028626                                           | Mcee          | methylmalonyl CoA epimerase                                        | 7   | 71,537,657  | 71,557,005  | -601, -169              | upstream, upstream | 5.50     |
| XM_975528                                           | EG665234      | predicted gene, EG665234                                           | 7   | 72,724,884  | 72,789,503  | 351                     | in gene            | 5.00     |
| NM_172310                                           | Tarsl2        | threonyl-tRNA synthetase-like 2                                    | 7   | 72,789,800  | 72,836,977  | -648                    | upstream           | 5.00     |
| XM_355911,<br>XM_886136,<br>XM_905687,<br>XM_919493 | Pcsk6         | proprotein convertase subtilisin/kexin type 6                      | 7   | 73,007,022  | 73,195,272  | 110738                  | in gene            | 6.00     |
| NM_021336                                           | Snrpa1        | small nuclear ribonucleoprotein polypeptide A'                     | 7   | 73,205,455  | 73,219,470  | 11569                   | in gene            | 7.00     |
| NM_024439                                           | H47           | histocompatibility 47                                              | 7   | 73,224,535  | 73,234,291  | -7511                   | upstream           | 7.00     |
| NM_146191                                           | Lrrk1         | leucine-rich repeat kinase 1                                       | 7   | 73,403,631  | 73,533,227  | 78219, 77835            | in gene, in gene   | 7.00     |
| XM_620510,<br>XM_907730                             | Lass3         | longevity assurance homolog 3 (S. cerevisiae)                      | 7   | 73,888,390  | 73,966,728  | 14602                   | in gene            | 5.00     |
| NM_025905                                           | Ttc23         | tetratricopeptide repeat domain 23                                 | 7   | 74,792,327  | 74,871,460  | 57668, 68121            | in gene, in gene   | 5.00     |
| NM_009697,<br>NM_183261                             | Nr2f2         | nuclear receptor subfamily 2, group F, member 2                    | 7   | 77,496,836  | 77,511,632  | 9072, 4864              | in gene, in gene   | 6.50     |
| XM_001478880                                        | LOC100042833  | hypothetical protein LOC100042833                                  | 7   | 77,514,395  | 77,516,324  | 9556                    | downstream         | 6.00     |
| XM_978127,<br>XM_980382                             | EG665610      | predicted gene, EG665610                                           | 7   | 80,762,744  | 80,763,274  | -262                    | upstream           | 8.00     |
| XM_133543,<br>XM_907140                             | Akap13        | A kinase (PRKA) anchor protein 13                                  | 7   | 82,600,185  | 82,899,495  | 178727                  | in gene            | 5.00     |
| NM_182782                                           | Klhl25        | kelch-like 25 (Drosophila)                                         | 7   | 82,993,283  | 83,012,377  | 11349                   | in gene            | 4.00     |
| NM_018811                                           | Abhd2         | abhydrolase domain containing 2                                    | 7   | 86,418,152  | 86,506,487  | 24, 3112                | in gene, in gene   | 6.50     |
| NM_008486                                           | Anpep         | alanyl (membrane) aminopeptidase                                   | 7   | 86,966,689  | 86,987,170  | 4930, -5854             | in gene, upstream  | 6.50     |
| NM_133952                                           | Unc45a        | unc-45 homolog A (C. elegans)                                      | 7   | 87,470,178  | 87,485,094  | -3618                   | upstream           | 6.00     |
| NM_026812                                           | Hddc3         | HD domain containing 3                                             | 7   | 87,488,023  | 87,490,983  | 689                     | in gene            | 6.00     |
| NM_001081454,<br>NM_011046                          | Furin         | furin (paired basic amino acid cleaving enzyme)                    | 7   | 87,534,080  | 87,550,317  | 3096, 2301              | in gene, in gene   | 6.00     |
| XM_001479473,<br>XM_001479496                       | Wdr73         | WD repeat domain 73                                                | 7   | 88,035,609  | 88,046,155  | 13819                   | downstream         | 5.00     |
| NM_054085                                           | Alpk3         | alpha-kinase 3                                                     | 7   | 88,202,486  | 88,250,498  | 35914                   | in gene            | 4.00     |
| NM_025997                                           | 2610204K14Rik | RIKEN cDNA 2610204K14 gene                                         | 7   | 88,907,839  | 88,914,376  | 577                     | in gene            | 6.00     |
| NM_177894                                           | 1700129I04Rik | RIKEN cDNA 1700129I04 gene                                         | 7   | 89,781,470  | 89,797,038  | -98                     | upstream           | 6.00     |
| NM_175317                                           | Eftud1        | elongation factor Tu GTP binding domain containing 1               | 7   | 89,797,151  | 89,926,362  | -15, 67745              | upstream, in gene  | 6.00     |
| NM_177695                                           | Tmc3          | transmembrane channel-like gene family 3                           | 7   | 90,733,441  | 90,772,219  | 21391                   | in gene            | 6.00     |
| NM_030705                                           | Mesdc1        | mesoderm development candidate 1                                   | 7   | 91,029,005  | 91,032,796  | -164                    | upstream           | 7.00     |
| NM_023403                                           | Mesdc2        | mesoderm development candidate 2                                   | 7   | 91,040,767  | 91,050,042  | -7807                   | upstream           | 7.00     |
| NM_030728                                           | 9930013L23Rik | RIKEN cDNA 9930013L23 gene                                         | 7   | 91,083,293  | 91,235,012  | 68068, -220             | in gene, upstream  | 7.00     |
| NM_009982                                           | Ctsc          | cathepsin C                                                        | 7   | 95,426,645  | 95,459,398  | -229                    | upstream           | 5.00     |
| XM_357814                                           | EG384719      | predicted gene, EG384719                                           | 7   | 97,255,987  | 97,271,485  | -6691                   | upstream           | 6.00     |
| XM_896611,<br>XM_922997                             | 2310010J17Rik | RIKEN cDNA 2310010J17 gene                                         | 7   | 97,273,368  | 97,278,775  | 599                     | in gene            | 6.00     |
| NM_146194                                           | Picalm        | phosphatidylinositol binding clathrin assembly protein             | 7   | 97,278,742  | 97,357,442  | -566                    | upstream           | 6.00     |
| XR_035233,<br>XR_035450                             | 4632427E13Rik | RIKEN cDNA 4632427E13 gene                                         | 7   | 99,888,634  | 99,889,977  | 457                     | in gene            | 5.00     |
| NM_029494                                           | Rab30         | RAB30, member RAS oncogene family                                  | 7   | 99,890,224  | 99,985,627  | -704                    | upstream           | 5.00     |
| NM_001080995                                        | 4632434I11Rik | RIKEN cDNA 4632434I11 gene                                         | 7   | 100,006,036 | 100,022,742 | -1210                   | upstream           | 5.00     |
| NM_028243                                           | Prpc          | prolylcarboxypeptidase (angiotensinase C)                          | 7   | 100,023,807 | 100,082,509 | 145                     | in gene            | 5.00     |
| NM_011858                                           | Odz4          | odd Oz/ten-m homolog 4 (Drosophila)                                | 7   | 103,359,147 | 104,057,064 | 97157                   | in gene            | 5.00     |
| NM_010248                                           | Gab2          | growth factor receptor bound protein 2-associated protein 2        | 7   | 104,230,261 | 104,453,546 | 1163                    | in gene            | 9.00     |
| NM_001010826,<br>NM_001012434                       | Kctd14        | potassium channel tetramerisation domain containing 14             | 7   | 104,601,714 | 104,607,003 | -6498                   | upstream           | 6.00     |
| NM_001081267                                        | Rsf1          | remodeling and spacing factor 1                                    | 7   | 104,728,406 | 104,835,302 | 102570                  | in gene            | 6.00     |
| NM_007602                                           | Capn5         | calpain 5                                                          | 7   | 105,270,075 | 105,326,703 | 6799                    | in gene            | 6.00     |

| Accession No.                                             | Symbol        | Gene Title                                                                              | Chr | Gene Start  | Gene End    | Interval Dists to Start | Interval Pos         | Avg Peak |
|-----------------------------------------------------------|---------------|-----------------------------------------------------------------------------------------|-----|-------------|-------------|-------------------------|----------------------|----------|
| XR_035196,<br>XR_035257                                   | A630091E08Rik | RIKEN cDNA A630091E08 gene                                                              | 7   | 105,691,830 | 105,711,500 | -9620                   | upstream             | 8.00     |
| NM_009519                                                 | Wnt11         | wingless-related MMTV integration site 11                                               | 7   | 105,987,355 | 106,002,258 | 12581                   | in gene              | 12.00    |
| NM_001043355,<br>NM_001048167,<br>NM_010837               | Mtap6         | microtubule-associated protein 6                                                        | 7   | 106,415,957 | 106,485,647 | 23659                   | in gene              | 5.00     |
| NM_009825                                                 | Serpinh1      | serine (or cysteine) peptidase inhibitor, clade H, member 1                             | 7   | 106,493,886 | 106,501,606 | -346                    | upstream             | 8.00     |
| NM_133692                                                 | Pold3         | polymerase (DNA-directed), delta 3, accessory subunit                                   | 7   | 107,230,623 | 107,270,010 | -38                     | upstream             | 10.00    |
| NM_001081116                                              | Arhgef17      | Rho guanine nucleotide exchange factor (GEF) 17                                         | 7   | 108,018,260 | 108,080,675 | 55915, 17635            | in gene, in gene     | 5.00     |
| NM_199012                                                 | Fchs2         | FCH and double SH3 domains 2                                                            | 7   | 108,257,327 | 108,432,919 | -639                    | upstream             | 6.00     |
| NM_001040111,<br>NM_001040112,<br>NM_027180,<br>NM_198096 | Centd2        | centaurin, delta 2                                                                      | 7   | 108,496,583 | 108,561,100 | 13892, 71561            | in gene, downstream  | 4.50     |
|                                                           | Mir139        | microRNA 139                                                                            | 7   | 108,623,889 | 108,623,956 | -8673                   | upstream             | 7.00     |
| NM_010567                                                 | Inpp1         | inositol polyphosphate phosphatase-like 1                                               | 7   | 108,971,175 | 108,986,590 | 718                     | in gene              | 6.00     |
| NM_008035                                                 | Folr2         | folate receptor 2 (fetal)                                                               | 7   | 108,988,502 | 109,012,042 | 26170, -5974            | downstream, upstream | 5.50     |
| NM_008034                                                 | Folr1         | folate receptor 1 (adult)                                                               | 7   | 109,006,845 | 109,019,197 | 1181                    | in gene              | 5.00     |
| NM_022979                                                 | Nup98         | nucleoporin 98                                                                          | 7   | 109,282,717 | 109,358,634 | 234                     | in gene              | 6.00     |
| NM_018880                                                 | Trim3         | tripartite motif protein 3                                                              | 7   | 112,758,984 | 112,782,013 | -51                     | upstream             | 5.00     |
| NM_029802                                                 | Arfp2         | ADP-ribosylation factor interacting protein 2                                           | 7   | 112,784,135 | 112,788,861 | 6797                    | downstream           | 5.00     |
| NM_019502                                                 | Fxc1          | fractured callus expressed transcript 1                                                 | 7   | 112,789,054 | 112,790,360 | -6990                   | upstream             | 5.00     |
| NM_021889                                                 | Syt9          | synaptotagmin IX                                                                        | 7   | 114,514,304 | 114,692,169 | 16                      | in gene              | 6.00     |
| NM_008905                                                 | Ppfbp2        | protein tyrosine phosphatase, receptor-type, F interacting protein, binding protein 2   | 7   | 114,738,780 | 114,888,399 | 79876                   | in gene              | 5.00     |
| NM_011975                                                 | Rpl27a        | ribosomal protein L27a                                                                  | 7   | 116,662,709 | 116,665,883 | 395                     | in gene              | 6.00     |
| NM_001001326,<br>NM_029811                                | St5           | suppression of tumorigenicity 5                                                         | 7   | 116,667,425 | 116,760,661 | 97557                   | downstream           | 6.00     |
| NM_053247                                                 | Xlkd1         | extra cellular link domain-containing 1                                                 | 7   | 117,994,121 | 118,006,467 | -5261                   | upstream             | 6.00     |
| NM_194464                                                 | Mrv1          | MRV integration site 1                                                                  | 7   | 118,011,781 | 118,125,609 | 113881                  | downstream           | 6.00     |
| XM_001479276                                              | LOC100043221  | hypothetical protein LOC100043221                                                       | 7   | 118,226,578 | 118,266,051 | -109                    | upstream             | 7.00     |
| XM_001478600                                              | LOC100042658  | similar to Ubif protein                                                                 | 7   | 118,266,282 | 118,386,337 | 120177, 86209           | downstream, in gene  | 6.00     |
| NM_173739                                                 | Galnt4        | UDP-N-acetyl-alpha-D-galactosamine:polypeptide N-acetylgalactosaminyltransferase-like 4 | 7   | 118,615,175 | 118,923,491 | 112867                  | in gene              | 6.00     |
| NM_015814                                                 | Dkk3          | dickkopf homolog 3 ( <i>Xenopus laevis</i> )                                            | 7   | 119,259,533 | 119,302,571 | 9963                    | in gene              | 5.00     |
| NM_009346                                                 | Tead1         | TEA domain family member 1                                                              | 7   | 119,823,107 | 120,043,504 | 146877                  | in gene              | 10.00    |
| XM_001479452                                              | LOC100043295  | similar to ribosomal protein L5                                                         | 7   | 121,848,312 | 121,849,763 | -7325                   | upstream             | 7.00     |
| NM_054084                                                 | Calcb         | calcitonin-related polypeptide, beta                                                    | 7   | 121,862,151 | 121,866,737 | -5063                   | upstream             | 7.00     |
| NM_175645                                                 | Xylt1         | xylosyltransferase 1                                                                    | 7   | 124,524,493 | 124,811,144 | 20659, 124595           | in gene, in gene     | 6.00     |
| NM_170669                                                 | Rps15a        | ribosomal protein S15a                                                                  | 7   | 125,247,888 | 125,259,661 | -24                     | upstream             | 4.00     |
| NM_019419                                                 | Arl6ip1       | ADP-ribosylation factor-like 6 interacting protein 1                                    | 7   | 125,262,414 | 125,273,077 | 13392                   | downstream           | 4.00     |
| NM_138649                                                 | Syt17         | synaptotagmin XVII                                                                      | 7   | 125,525,370 | 125,587,066 | -7670                   | upstream             | 6.00     |
| XM_001478924                                              | LOC100042845  | hypothetical protein LOC100042845                                                       | 7   | 125,589,777 | 125,591,866 | 4959                    | downstream           | 6.00     |
| NM_022420                                                 | Gprc5b        | G protein-coupled receptor, family C, group 5, member B                                 | 7   | 126,115,561 | 126,138,669 | -611                    | upstream             | 5.00     |
| NM_001024138                                              | Gpr139        | G protein-coupled receptor 139                                                          | 7   | 126,287,837 | 126,327,888 | 38464                   | in gene              | 5.00     |
| NM_173408                                                 | Dcun1d3       | DCN1, defective in cullin neddylation 1, domain containing 3 ( <i>S. cerevisiae</i> )   | 7   | 126,999,327 | 127,038,917 | 69, -699                | in gene, upstream    | 5.50     |
| XM_001479781                                              | LOC100043396  | hypothetical protein LOC100043396                                                       | 7   | 127,037,858 | 127,039,812 | 964, 196                | in gene, in gene     | 5.50     |
| NM_029610                                                 | Lym1          | LYR motif containing 1                                                                  | 7   | 127,039,806 | 127,060,264 | -958, -190              | upstream, upstream   | 5.50     |
| NM_025298                                                 | Polr3e        | polymerase (RNA) III (DNA directed) polypeptide E                                       | 7   | 128,061,331 | 128,089,763 | 4893                    | in gene              | 6.00     |
| XM_001478471,<br>XM_001479210                             | 4930413G21Rik | RIKEN cDNA 4930413G21 gene                                                              | 7   | 130,112,572 | 130,113,564 | 332                     | in gene              | 8.00     |
| NM_175023                                                 | Rbbp6         | retinoblastoma binding protein 6                                                        | 7   | 130,114,333 | 130,123,695 | -1101                   | upstream             | 8.00     |
| NM_144529                                                 | Arhgap17      | Rho GTPase activating protein 17                                                        | 7   | 130,422,785 | 130,513,396 | 75052                   | in gene              | 4.00     |
| NM_025304                                                 | Lcmt1         | leucine carboxyl methyltransferase 1                                                    | 7   | 130,521,496 | 130,573,872 | 39000                   | in gene              | 6.00     |
| NM_001081022                                              | D430042O09Rik | RIKEN cDNA D430042O09 gene                                                              | 7   | 132,851,390 | 133,018,311 | 19426, 76130            | in gene, in gene     | 5.50     |
| NM_029420                                                 | Glyd2         | GIY-YIG domain containing 2                                                             | 7   | 133,834,650 | 133,839,297 | 353                     | in gene              | 7.00     |
| NM_175103                                                 | BolA2         | bolA-like 2 ( <i>E. coli</i> )                                                          | 7   | 133,839,514 | 133,840,207 | -570                    | upstream             | 7.00     |
| NM_009898                                                 | Coro1a        | coronin, actin binding protein 1A                                                       | 7   | 133,843,288 | 133,848,268 | 9324                    | downstream           | 7.00     |
| NM_024228                                                 | Gdpd3         | glycerophosphodiester phosphodiesterase domain containing 3                             | 7   | 133,909,928 | 133,919,159 | 10552                   | downstream           | 7.00     |
| NM_025347,<br>NM_026875                                   | Ypel3         | yippee-like 3 ( <i>Drosophila</i> )                                                     | 7   | 133,920,489 | 133,924,028 | -9                      | upstream             | 7.00     |
| NM_011538                                                 | Tbx6          | T-box 6                                                                                 | 7   | 133,924,997 | 133,929,062 | -4517                   | upstream             | 7.00     |
| NM_019674                                                 | Ppp4c         | protein phosphatase 4, catalytic subunit                                                | 7   | 133,929,382 | 133,935,985 | 15505                   | downstream           | 7.00     |
| NM_010069                                                 | Doc2a         | double C2, alpha                                                                        | 7   | 133,991,067 | 133,996,219 | 53                      | in gene              | 5.00     |
| NM_153580                                                 | Cdc95         | coiled-coil domain containing 95                                                        | 7   | 133,995,947 | 134,004,977 | 13857                   | downstream           | 5.00     |
| NM_008400                                                 | Itgal         | integrin alpha L                                                                        | 7   | 134,439,862 | 134,477,412 | 10522, 26314            | in gene, in gene     | 5.50     |
| NM_001040684,<br>NM_133943                                | Hsd3b7        | hydroxy-delta-5-steroid dehydrogenase, 3 beta- and steroid delta-isomerase 7            | 7   | 134,944,123 | 134,947,316 | 37                      | in gene              | 8.00     |
| NM_024414                                                 | Stx1b2        | syntaxin 1B2                                                                            | 7   | 134,950,358 | 134,968,045 | 23885                   | downstream           | 8.00     |
| NM_146259                                                 | Zfp668        | zinc finger protein 668                                                                 | 7   | 135,008,873 | 135,020,337 | 401                     | in gene              | 7.00     |

| Accession No.                 | Symbol        | Gene Title                                                                                       | Chr | Gene Start  | Gene End    | Interval Dists to Start | Interval Pos              | Avg Peak |
|-------------------------------|---------------|--------------------------------------------------------------------------------------------------|-----|-------------|-------------|-------------------------|---------------------------|----------|
| NM_172749                     | Zfp646        | zinc finger protein 646                                                                          | 7   | 135,021,215 | 135,029,510 | -1279                   | upstream                  | 7.00     |
| NM_001081268                  | BC039632      | cDNA sequence BC039632                                                                           | 7   | 135,028,958 | 135,034,484 | 14548                   | downstream                | 7.00     |
| NM_139149                     | Fus           | fusion, derived from t(12;16) malignant liposarcoma (human)                                      | 7   | 135,110,993 | 135,125,546 | -161                    | upstream                  | 6.00     |
| XM_001479568                  | LOC100043133  | similar to crooked legs CG14938-PB                                                               | 7   | 135,379,715 | 135,380,933 | 69                      | in gene                   | 9.00     |
| NM_146205                     | Armc5         | armadillo repeat containing 5                                                                    | 7   | 135,380,871 | 135,388,614 | -7                      | upstream                  | 9.00     |
| NM_009365                     | Tgfb1i1       | transforming growth factor beta 1 induced transcript 1                                           | 7   | 135,390,385 | 135,397,226 | -9521                   | upstream                  | 9.00     |
| XM_902363,<br>XM_924870       | EG628781      | predicted gene, EG628781                                                                         | 7   | 135,458,298 | 135,484,624 | 3942, 14982             | in gene, in gene          | 5.50     |
| XM_001003100,<br>XM_915289    | EG639030      | predicted gene, EG639030                                                                         | 7   | 135,739,430 | 135,739,792 | 4547                    | downstream                | 4.00     |
| NM_178641                     | Inpp5f        | inositol polyphosphate-5-phosphatase F                                                           | 7   | 135,754,879 | 135,839,950 | 27121                   | in gene                   | 11.00    |
| NM_019564                     | Htra1         | HtrA serine peptidase 1                                                                          | 7   | 138,079,749 | 138,129,167 | 40283                   | in gene                   | 8.00     |
| NM_029609                     | 2310007H09Rik | RIKEN cDNA 2310007H09 gene                                                                       | 7   | 139,802,326 | 139,898,102 | 9461, 51082             | in gene, in gene          | 5.00     |
| NM_175268,<br>NM_212473       | A930008G19Rik | RIKEN cDNA A930008G19 gene                                                                       | 7   | 139,903,767 | 140,004,879 | 32783, 18431            | in gene, in gene          | 6.00     |
| NM_009980                     | Ctbp2         | C-terminal binding protein 2                                                                     | 7   | 140,178,694 | 140,315,166 | 69294                   | in gene                   | 7.00     |
| XM_001479821                  | LOC100043248  | similar to chromosome 10 open reading frame 90                                                   | 7   | 141,616,800 | 141,690,746 | 56122                   | in gene                   | 7.00     |
| NM_001033420                  | Dock1         | dedicator of cyto-kinesis 1                                                                      | 7   | 141,862,370 | 142,365,330 | 267118, 426334, 441246  | in gene, in gene, in gene | 5.67     |
| XM_001004753                  | EG668693      | predicted gene, EG668693                                                                         | 7   | 142,127,566 | 142,129,961 | 1922                    | in gene                   | 6.00     |
| XM_133909,<br>XM_925223       | 9430038I01Rik | RIKEN cDNA 9430038I01 gene                                                                       | 7   | 144,527,469 | 144,602,439 | -590                    | upstream                  | 4.00     |
| NM_023140                     | Txnl2         | thioredoxin-like 2                                                                               | 7   | 144,629,331 | 144,660,277 | -7667                   | upstream                  | 4.00     |
| NM_009760                     | Bnip3         | BCL2/adenovirus E1B interacting protein 1, NIP3                                                  | 7   | 146,082,519 | 146,101,189 | -139, -9835             | upstream, upstream        | 6.00     |
| XM_001472165,<br>XM_919084    | 9330101J02Rik | RIKEN cDNA 9330101J02 gene                                                                       | 7   | 146,814,255 | 146,869,716 | -588                    | upstream                  | 6.00     |
| NM_177261                     | Kndc1         | kinase non-catalytic C-lobe domain (KIND) containing 1                                           | 7   | 147,080,737 | 147,127,438 | 20687                   | in gene                   | 5.00     |
| XM_887149,<br>XM_916730       | Zfp511        | zinc finger protein 511                                                                          | 7   | 147,222,306 | 147,226,504 | -2                      | upstream                  | 6.00     |
| NM_010836                     | Msx3          | homeo box, msh-like 3                                                                            | 7   | 147,232,161 | 147,234,985 | 12681                   | downstream                | 6.00     |
| NM_026820                     | Ifitm1        | interferon induced transmembrane protein 1                                                       | 7   | 148,141,967 | 148,155,717 | 15121                   | downstream                | 6.00     |
| NM_177897                     | B4galnt4      | beta-1,4-N-acetyl-galactosaminyl transferase 4                                                   | 7   | 148,247,173 | 148,258,018 | 3579                    | in gene                   | 6.00     |
| NM_027797                     | Tmem80        | transmembrane protein 80                                                                         | 7   | 148,514,029 | 148,522,710 | 10691, 11891            | downstream, downstream    | 5.00     |
| NM_133191                     | Eps8l2        | EPS8-like 2                                                                                      | 7   | 148,524,901 | 148,548,915 | -181, 1019              | upstream, in gene         | 5.00     |
| NM_011528                     | Taldo1        | transaldolase 1                                                                                  | 7   | 148,578,110 | 148,588,867 | 1826, 10306             | in gene, in gene          | 4.50     |
| XM_001480697,<br>XM_001480699 | LOC100043585  | similar to Ran-interacting protein MOG1                                                          | 7   | 148,592,410 | 148,593,254 | -3994                   | upstream                  | 4.00     |
| NM_172116                     | Pddc1         | Parkinson disease 7 domain containing 1                                                          | 7   | 148,594,083 | 148,599,996 | 11580                   | downstream                | 4.00     |
| NM_021316                     | Cend1         | cell cycle exit and neuronal differentiation 1                                                   | 7   | 148,612,348 | 148,615,319 | -8393                   | upstream                  | 6.00     |
| NM_026646                     | Slc25a22      | solute carrier family 25 (mitochondrial carrier, glutamate), member 22                           | 7   | 148,615,651 | 148,623,517 | -195                    | upstream                  | 6.00     |
| NM_022654                     | Lrdd          | leucine-rich and death domain containing                                                         | 7   | 148,624,414 | 148,629,254 | 5542                    | downstream                | 6.00     |
| NM_026020                     | Rplp2         | ribosomal protein, large P2                                                                      | 7   | 148,633,555 | 148,637,484 | -9843                   | upstream                  | 6.00     |
| NM_001025103                  | Efcab4a       | EF-hand calcium binding domain 4A                                                                | 7   | 148,647,042 | 148,652,512 | 15518                   | downstream                | 7.00     |
| NM_009842                     | Cd151         | CD151 antigen                                                                                    | 7   | 148,653,292 | 148,657,372 | 9268                    | downstream                | 7.00     |
| XM_888022,<br>XM_916953       | Polr2l        | polymerase (RNA) II (DNA directed) polypeptide L                                                 | 7   | 148,657,758 | 148,666,947 | 4387                    | in gene                   | 7.00     |
| NM_053082                     | Tspan4        | tetraspanin 4                                                                                    | 7   | 148,661,139 | 148,679,321 | 1421                    | in gene                   | 7.00     |
| NM_007459                     | Ap2a2         | adaptor protein complex AP-2, alpha 2 subunit                                                    | 7   | 148,748,137 | 148,818,910 | -41                     | upstream                  | 5.00     |
| NM_008748                     | Dusp8         | dual specificity phosphatase 8                                                                   | 7   | 149,267,401 | 149,276,175 | -7740                   | upstream                  | 7.00     |
| NR_001592                     | H19           | H19 fetal liver mRNA                                                                             | 7   | 149,761,437 | 149,764,051 | -3789                   | upstream                  | 5.00     |
|                               | Mirn675       | microRNA 675                                                                                     | 7   | 149,762,968 | 149,763,051 | -4789                   | upstream                  | 5.00     |
| NM_020286                     | Tspan32       | tetraspanin 32                                                                                   | 7   | 150,191,596 | 150,205,549 | 19796                   | downstream                | 5.00     |
| NM_133790                     | R74862        | expressed sequence R74862                                                                        | 7   | 150,219,494 | 150,239,001 | 27609                   | downstream                | 5.00     |
| NM_013742                     | Cars          | cysteinyl-tRNA synthetase                                                                        | 7   | 150,743,133 | 150,785,961 | 13433                   | in gene                   | 4.00     |
| NM_203492                     | Mrgprg        | MAS-related GPR, member G                                                                        | 7   | 150,949,615 | 150,952,898 | 9794                    | downstream                | 5.00     |
| NM_007803                     | Ctn           | cortactin                                                                                        | 7   | 151,621,629 | 151,656,646 | -5258                   | upstream                  | 5.00     |
| XM_133979,<br>XM_918243       | Ppfta1        | protein tyrosine phosphatase, receptor type, f polypeptide (PTPRF), interacting protein, alpha 1 | 7   | 151,662,670 | 151,739,634 | 77730                   | downstream                | 5.00     |
| NM_145379                     | Mrgprf        | MAS-related GPR, member F                                                                        | 7   | 152,486,814 | 152,495,462 | 1943                    | in gene                   | 5.00     |
| NM_080461                     | Zfp358        | zinc finger protein 358                                                                          | 8   | 3,493,138   | 3,497,208   | 8750                    | downstream                | 7.00     |
| NM_053177                     | Mcoln1        | mucolipin 1                                                                                      | 8   | 3,500,519   | 3,515,232   | 1369                    | in gene                   | 7.00     |
| NM_173446                     | Tmem28        | transmembrane protein 28                                                                         | 8   | 9,206,010   | 9,771,023   | 569631                  | downstream                | 6.00     |
| NM_176953                     | Lig4          | ligase IV, DNA, ATP-dependent                                                                    | 8   | 9,970,020   | 9,976,323   | -1485                   | upstream                  | 8.00     |
| NM_001081119                  | Abhd13        | abhydrolase domain containing 13                                                                 | 8   | 9,977,717   | 9,992,155   | 91                      | in gene                   | 8.00     |
| NM_001081397                  | Myo16         | myosin XVI                                                                                       | 8   | 10,153,923  | 10,633,950  | 203485, 460797          | in gene, in gene          | 6.00     |
| NM_009931                     | Col4a1        | procollagen, type IV, alpha 1                                                                    | 8   | 11,198,431  | 11,312,730  | 109018                  | in gene                   | 5.00     |
| XM_001474115,<br>XM_906739    | Cars2         | cysteinyl-tRNA synthetase 2 (mitochondrial)(putative)                                            | 8   | 11,513,975  | 11,555,691  | -2480                   | upstream                  | 5.00     |
| NM_011919                     | Ing1          | inhibitor of growth family, member 1                                                             | 8   | 11,556,066  | 11,563,250  | 2105                    | in gene                   | 5.00     |

| Accession No.                                                   | Symbol        | Gene Title                                                                                      | Chr | Gene Start | Gene End   | Interval Dists to Start | Interval Pos                 | Avg Peak |
|-----------------------------------------------------------------|---------------|-------------------------------------------------------------------------------------------------|-----|------------|------------|-------------------------|------------------------------|----------|
| NM_017402                                                       | Arhgef7       | Rho guanine nucleotide exchange factor (GEF7)                                                   | 8   | 11,758,347 | 11,835,219 | 469                     | in gene                      | 6.00     |
| NM_001013812                                                    | EG434280      | predicted gene, EG434280                                                                        | 8   | 12,385,771 | 12,436,732 | 11018                   | in gene                      | 4.00     |
| XM_489223,<br>XM_920462                                         | EG434279      | predicted gene, EG434279                                                                        | 8   | 12,390,168 | 12,391,639 | -5150                   | upstream                     | 4.00     |
| NM_009233                                                       | Sox1          | SRY-box containing gene 1                                                                       | 8   | 12,396,353 | 12,397,562 | 436                     | in gene                      | 4.00     |
| NM_015804                                                       | Atp11a        | ATPase, class VI, type 11A                                                                      | 8   | 12,757,224 | 12,865,173 | 15848                   | in gene                      | 5.00     |
| NM_178076                                                       | Mcf2l         | mcf.2 transforming sequence-like                                                                | 8   | 12,915,958 | 13,020,502 | 39402                   | in gene                      | 6.00     |
| NM_001024504,<br>NM_001042649,<br>NM_001042650,<br>NM_001042651 | Dcun1d2       | DCN1, defective in cullin neddylation 1, domain containing 2 (S. cerevisiae)                    | 8   | 13,255,963 | 13,288,126 | 926                     | in gene                      | 7.00     |
| NM_172282                                                       | Tmco3         | transmembrane and coiled-coil domains 3                                                         | 8   | 13,288,013 | 13,322,924 | -813                    | upstream                     | 7.00     |
| NM_011881                                                       | Grk1          | G protein-coupled receptor kinase 1                                                             | 8   | 13,405,081 | 13,417,580 | 4455                    | in gene                      | 5.00     |
| NM_001037736,<br>NM_172751                                      | Arhgef10      | Rho guanine nucleotide exchange factor (GEF) 10                                                 | 8   | 14,911,717 | 15,001,085 | 29691                   | in gene                      | 5.00     |
| NM_026792                                                       | Agpat5        | 1-acylglycerol-3-phosphate O-acyltransferase 5 (lysophosphatidic acid acyltransferase, epsilon) | 8   | 18,846,279 | 18,884,413 | 6473                    | in gene                      | 5.00     |
| XM_001476645                                                    | LOC100041567  | similar to p47 protein                                                                          | 8   | 19,783,773 | 19,792,069 | 883                     | in gene                      | 9.00     |
| NM_008872                                                       | Plat          | plasminogen activator, tissue                                                                   | 8   | 23,868,240 | 23,893,316 | 8144                    | in gene                      | 8.00     |
| NM_153397                                                       | Adam32        | a disintegrin and metallopeptidase domain 32                                                    | 8   | 25,946,616 | 26,059,259 | 2011                    | in gene                      | 5.00     |
| NM_001079908,<br>NM_001079909,<br>NM_010206                     | Fgfr1         | fibroblast growth factor receptor 1                                                             | 8   | 26,629,244 | 26,686,186 | 10132, 18596            | in gene, in gene             | 6.00     |
| NM_001080793,<br>NM_011791                                      | Ash2l         | ash2 (absent, small, or homeotic)-like (Drosophila)                                             | 8   | 26,927,342 | 26,958,142 | 18862, 6782             | in gene, in gene             | 5.50     |
| NM_008432                                                       | Kcnu1         | potassium channel, subfamily U, member 1                                                        | 8   | 26,960,095 | 27,048,406 | -8735                   | upstream                     | 6.00     |
| NM_207659                                                       | Hook3         | hook homolog 3 (Drosophila)                                                                     | 8   | 27,142,362 | 27,229,486 | -610                    | upstream                     | 5.00     |
| NM_029965                                                       | Rnf170        | ring finger protein 170                                                                         | 8   | 27,229,852 | 27,254,343 | 244                     | in gene                      | 5.00     |
| NM_026067                                                       | Thex1         | three prime histone mRNA exonuclease 1                                                          | 8   | 36,528,307 | 36,558,535 | 22140                   | in gene                      | 6.00     |
| XM_001476601                                                    | LOC100041572  | hypothetical protein LOC100041572                                                               | 8   | 36,762,110 | 36,830,423 | 57069                   | in gene                      | 5.00     |
| NM_001040699                                                    | Mtmr7         | myotubularin related protein 7                                                                  | 8   | 41,635,513 | 41,720,146 | -4483                   | upstream                     | 6.00     |
| NM_023662                                                       | Pcm1          | pericentriolar material 1                                                                       | 8   | 42,325,127 | 42,417,698 | 169                     | in gene                      | 6.00     |
| XM_001473026                                                    | LOC100039508  | similar to cyclic nucleotide gated channel beta 1                                               | 8   | 45,806,143 | 46,020,493 | 215153                  | downstream                   | 6.00     |
| NM_001081286                                                    | Fat1          | FAT tumor suppressor homolog 1 (Drosophila)                                                     | 8   | 46,035,568 | 46,137,611 | 48656, 100752, 110752   | in gene, in gene, downstream | 6.00     |
| NM_008639                                                       | Mtnr1a        | melatonin receptor 1A                                                                           | 8   | 46,154,564 | 46,173,860 | -8244                   | upstream                     | 7.00     |
| NM_172752                                                       | Sorbs2        | sorbin and SH3 domain containing 2                                                              | 8   | 46,593,149 | 46,913,258 | 138211                  | in gene                      | 6.00     |
| NM_027973                                                       | Mlf1p         | myeloid leukemia factor 1 interacting protein                                                   | 8   | 47,637,423 | 47,664,938 | -1807                   | upstream                     | 6.00     |
| XM_001474568,<br>XM_358744                                      | 4930448N21Rik | RIKEN cDNA 4930448N21 gene                                                                      | 8   | 48,379,626 | 48,531,716 | 157161                  | downstream                   | 4.00     |
| NM_133791                                                       | Wwc2          | WW, C2 and coiled-coil domain containing 2                                                      | 8   | 48,912,949 | 49,075,905 | 123393                  | in gene                      | 5.00     |
| NM_011857                                                       | Odz3          | odd Oz/ten-m homolog 3 (Drosophila)                                                             | 8   | 49,313,038 | 49,760,044 | 431436                  | in gene                      | 6.00     |
| NM_144731                                                       | Galnt7        | UDP-N-acetyl-alpha-D-galactosamine: polypeptide N-acetylgalactosaminyltransferase 7             | 8   | 60,003,366 | 60,131,800 | 6834                    | in gene                      | 4.00     |
| NM_021506                                                       | Sh3rf1        | SH3 domain containing ring finger 1                                                             | 8   | 63,702,968 | 63,874,869 | 6008, 23272, 166952     | in gene, in gene, in gene    | 5.67     |
| NM_001045553,<br>NM_172754                                      | A1449175      | expressed sequence A1449175                                                                     | 8   | 72,134,553 | 72,149,447 | 471                     | in gene                      | 5.00     |
| NM_133224                                                       | Atp13a1       | ATPase type 13A1                                                                                | 8   | 72,315,133 | 72,331,644 | 14648                   | in gene                      | 6.00     |
| NM_198101                                                       | Gmip          | Gem-interacting protein                                                                         | 8   | 72,332,586 | 72,345,769 | -2805                   | upstream                     | 6.00     |
| NM_145597                                                       | Tmem161a      | transmembrane protein 161A                                                                      | 8   | 72,696,308 | 72,707,562 | 19548                   | downstream                   | 6.00     |
| NM_001007570                                                    | Slc25a42      | solute carrier family 25, member 42                                                             | 8   | 72,708,239 | 72,736,155 | 20299, -101             | in gene, upstream            | 6.00     |
| NM_016685                                                       | Comp          | cartilage oligomeric matrix protein                                                             | 8   | 72,897,457 | 72,905,965 | 5455                    | in gene                      | 6.00     |
| NM_001004062                                                    | Crtc1         | CREB regulated transcription coactivator 1                                                      | 8   | 72,906,257 | 72,963,472 | 60560, 18912            | downstream, in gene          | 5.00     |
| NM_018827                                                       | Crif1         | cytokine receptor-like factor 1                                                                 | 8   | 73,017,055 | 73,027,980 | 13569                   | downstream                   | 9.00     |
| NM_025577                                                       | 2810428115Rik | RIKEN cDNA 2810428115 gene                                                                      | 8   | 73,028,195 | 73,030,638 | 14                      | in gene                      | 9.00     |
| NM_019883                                                       | Uba52         | ubiquitin A-52 residue ribosomal protein fusion product 1                                       | 8   | 73,032,165 | 73,034,266 | 3642                    | downstream                   | 9.00     |
| XM_001477857                                                    | LOC100042011  | hypothetical protein LOC100042011                                                               | 8   | 73,387,026 | 73,389,327 | -8401, -9201            | upstream, upstream           | 5.50     |
| NM_026964                                                       | Ccdc124       | coiled-coil domain containing 124                                                               | 8   | 73,392,126 | 73,397,389 | -339, -1139             | upstream, upstream           | 5.50     |
| NM_053248                                                       | Slc5a5        | solute carrier family 5 (sodium iodide symporter), member 5                                     | 8   | 73,407,401 | 73,416,623 | 18895, 18095            | downstream, downstream       | 5.50     |
| NM_015742                                                       | Myo9b         | myosin IXb                                                                                      | 8   | 73,796,613 | 73,884,611 | 87051                   | in gene                      | 5.00     |
| NM_025917,<br>NM_029768                                         | 2010315L10Rik | RIKEN cDNA 2010315L10 gene                                                                      | 8   | 73,891,125 | 73,893,628 | -7461                   | upstream                     | 5.00     |
| NM_022419                                                       | Abhd8         | abhydrolase domain containing 8                                                                 | 8   | 73,980,604 | 73,987,545 | -1191                   | upstream                     | 6.00     |
| NM_053162                                                       | Mpl34         | mitochondrial ribosomal protein L34                                                             | 8   | 73,988,825 | 73,989,652 | -89                     | upstream                     | 6.00     |
| XM_001476732,<br>XM_912953                                      | 1500034J01Rik | RIKEN cDNA 1500034J01 gene                                                                      | 8   | 73,993,086 | 74,000,326 | -4350                   | upstream                     | 6.00     |
| XM_889480                                                       | Tmem16h       | transmembrane protein 16H                                                                       | 8   | 73,995,493 | 74,009,966 | 21230                   | downstream                   | 6.00     |
| XM_001478555                                                    | LOC100042405  | similar to high mobility group nucleosomal binding domain 2                                     | 8   | 74,827,959 | 74,829,212 | -1796                   | upstream                     | 5.00     |
| NM_010687                                                       | Large         | like-glycosyltransferase                                                                        | 8   | 75,338,498 | 75,876,455 | -1065                   | upstream                     | 7.00     |
| XM_001472068                                                    | LOC100039001  | hypothetical protein LOC100039001                                                               | 8   | 75,875,064 | 75,877,621 | 101                     | in gene                      | 7.00     |
| NM_010442                                                       | Hmox1         | heme oxygenase (decycling) 1                                                                    | 8   | 77,617,521 | 77,624,484 | -113                    | upstream                     | 4.00     |



| Accession No.              | Symbol        | Gene Title                                                                                        | Chr | Gene Start  | Gene End    | Interval Dists to Start    | Interval Pos                       | Avg Peak |
|----------------------------|---------------|---------------------------------------------------------------------------------------------------|-----|-------------|-------------|----------------------------|------------------------------------|----------|
| NM_008566                  | Mcm5          | minichromosome maintenance deficient 5, cell division cycle 46 (S. cerevisiae)                    | 8   | 77,633,427  | 77,652,338  | 15181                      | in gene                            | 5.00     |
| XM_001472461               | LOC100039211  | hypothetical protein LOC100039211                                                                 | 8   | 79,273,850  | 79,426,092  | -84                        | upstream                           | 7.00     |
| NM_001083906               | Nr3c2         | nuclear receptor subfamily 3, group C, member 2                                                   | 8   | 79,426,407  | 79,767,538  | -231                       | upstream                           | 7.00     |
| NM_030113                  | Arhgap10      | Rho GTPase activating protein 10                                                                  | 8   | 79,774,265  | 80,041,806  | 73566, 73006, 4782         | in gene, in gene, in gene          | 5.67     |
| XM_001472504               | LOC100039235  | hypothetical protein LOC100039235                                                                 | 8   | 80,041,781  | 80,047,934  | -4757                      | upstream                           | 6.00     |
| NM_009033                  | Rbmxrt        | RNA binding motif protein, X chromosome retrogene                                                 | 8   | 81,029,168  | 81,032,827  | -37                        | upstream                           | 7.00     |
| NM_029736                  | Slc10a7       | solute carrier family 10 (sodium/bile acid cotransporter family), member 7                        | 8   | 81,033,234  | 81,257,904  | -370, 225054               | upstream, downstream               | 7.00     |
| XM_906331, XM_984073       | Frem3         | Fras1 related extracellular matrix protein 3                                                      | 8   | 83,134,938  | 83,219,456  | 79670                      | in gene                            | 6.00     |
| NM_053124                  | Smarca5       | SWI/SNF related, matrix associated, actin dependent regulator of chromatin, subfamily a, member 5 | 8   | 83,223,842  | 83,263,358  | 48750                      | downstream                         | 6.00     |
| NM_177262                  | Pkn1          | protein kinase N1                                                                                 | 8   | 86,193,995  | 86,223,025  | -15                        | upstream                           | 5.00     |
| NM_181039                  | Lphn1         | latrophilin 1                                                                                     | 8   | 86,424,612  | 86,463,876  | -580                       | upstream                           | 6.00     |
|                            | Mirn23a       | microRNA 23a                                                                                      | 8   | 86,732,416  | 86,732,490  | -6736                      | upstream                           | 9.00     |
|                            | Mirn27a       | microRNA 27a                                                                                      | 8   | 86,732,570  | 86,732,656  | -6890                      | upstream                           | 9.00     |
|                            | Mirn24-2      | microRNA 24-2                                                                                     | 8   | 86,732,713  | 86,732,819  | -7033                      | upstream                           | 9.00     |
| NM_172503                  | Zswim4        | zinc finger, SWIM domain containing 4                                                             | 8   | 86,734,841  | 86,760,941  | 35261                      | downstream                         | 9.00     |
| NM_010499                  | Ier2          | immediate early response 2                                                                        | 8   | 87,183,450  | 87,186,747  | -6181                      | upstream                           | 7.00     |
| NM_025648                  | Farsa         | phenylalanyl-tRNA synthetase, alpha subunit                                                       | 8   | 87,380,923  | 87,390,925  | 165                        | in gene                            | 7.00     |
| XM_894155, XM_988455       | BC004022      | cDNA sequence BC004022                                                                            | 8   | 89,365,037  | 89,427,214  | 10862                      | in gene                            | 6.00     |
| XM_001474508               | LOC100040328  | hypothetical protein LOC100040328                                                                 | 8   | 90,568,802  | 90,589,523  | -6253                      | upstream                           | 5.00     |
| NM_012047                  | Brd7          | bromodomain containing 7                                                                          | 8   | 90,856,210  | 90,886,055  | -7977                      | upstream                           | 6.00     |
| XM_001474559               | LOC100040369  | similar to retinitis pigmentosa GTPase regulator interacting protein 1                            | 8   | 90,900,368  | 90,959,165  | -6336, 52432               | upstream, in gene                  | 5.50     |
| NM_027280                  | Nkd1          | naked cuticle 1 homolog (Drosophila)                                                              | 8   | 91,045,269  | 91,116,225  | 16939, 25179, 36747, 57899 | in gene, in gene, in gene, in gene | 8.00     |
| NM_021390                  | Sall1         | sal-like 1 (Drosophila)                                                                           | 8   | 91,552,142  | 91,566,338  | -318                       | upstream                           | 6.00     |
| XM_001476646               | LOC100041089  | hypothetical protein LOC100041089                                                                 | 8   | 91,562,636  | 91,565,980  | 4020                       | downstream                         | 6.00     |
| NM_177224                  | Chd9          | chromodomain helicase DNA binding protein 9                                                       | 8   | 93,352,736  | 93,578,407  | 79552, 80128               | in gene, in gene                   | 5.00     |
| XM_890814, XM_909999       | EG626231      | predicted gene, EG626231                                                                          | 8   | 93,430,430  | 93,432,614  | 326, -250                  | in gene, upstream                  | 5.00     |
| NM_011936                  | AJ237917      | cDNA sequence AJ237917                                                                            | 8   | 93,837,438  | 94,192,329  | 82, 193218                 | in gene, in gene                   | 6.50     |
| NM_008393                  | Irx3          | Iroquois related homeobox 3 (Drosophila)                                                          | 8   | 94,322,424  | 94,325,273  | -1639                      | upstream                           | 6.00     |
| NM_177767                  | Ogfod1        | 2-oxoglutarate and iron-dependent oxygenase domain containing 1                                   | 8   | 96,561,191  | 96,591,822  | 21801                      | in gene                            | 6.00     |
| NM_008631                  | Mt4           | metallothionein 4                                                                                 | 8   | 96,661,104  | 96,662,931  | -9280                      | upstream                           | 5.00     |
| NM_022331                  | Herpud1       | homocysteine-inducible, endoplasmic reticulum stress-inducible, ubiquitin-like domain member 1    | 8   | 96,910,400  | 96,919,258  | -6688, 224                 | upstream, in gene                  | 8.50     |
| NM_001033207               | AI451557      | expressed sequence AI451557                                                                       | 8   | 97,048,967  | 97,051,164  | 7801                       | downstream                         | 5.00     |
| NM_153507                  | Cpne2         | copine II                                                                                         | 8   | 97,056,928  | 97,094,429  | -160                       | upstream                           | 5.00     |
| NM_026385                  | Plip          | plasma membrane proteolipid                                                                       | 8   | 97,198,795  | 97,220,142  | 782                        | in gene                            | 6.00     |
| NM_024467                  | Zfp319        | zinc finger protein 319                                                                           | 8   | 97,850,036  | 97,855,850  | -246                       | upstream                           | 6.00     |
| NM_008187                  | Gtl3          | gene trap locus 3                                                                                 | 8   | 97,944,152  | 97,958,692  | 52                         | in gene                            | 7.00     |
| NM_009974                  | Csnk2a2       | casein kinase 2, alpha prime polypeptide                                                          | 8   | 97,971,872  | 98,012,690  | -302                       | upstream                           | 6.00     |
| XM_001477792, XM_001477935 | 4933406B17Rik | RIKEN cDNA 4933406B17 gene                                                                        | 8   | 98,020,347  | 98,024,848  | -7355                      | upstream                           | 6.00     |
| NM_009868                  | Cdh5          | cadherin 5                                                                                        | 8   | 106,625,599 | 106,668,401 | 11969                      | in gene                            | 6.00     |
| NM_001013380               | Dync1li2      | dynein, cytoplasmic 1 light intermediate chain 2                                                  | 8   | 106,943,024 | 106,966,905 | 13604, 5193                | in gene, in gene                   | 5.00     |
| NM_180958                  | Ccdc79        | coiled-coil domain containing 79                                                                  | 8   | 106,970,619 | 107,033,787 | 72075                      | downstream                         | 5.00     |
| NM_001024606               | 4833426J09Rik | RIKEN cDNA 4833426J09 gene                                                                        | 8   | 107,115,368 | 107,120,749 | -8360, -125                | upstream, upstream                 | 6.00     |
| NM_007663                  | Cdh16         | cadherin 16                                                                                       | 8   | 107,138,047 | 107,148,161 | 12833, -6431               | downstream, upstream               | 5.50     |
| NM_019662                  | Rrad          | Ras-related associated with diabetes                                                              | 8   | 107,151,966 | 107,155,221 | 629                        | in gene                            | 6.00     |
| NM_026753                  | 1110019N10Rik | RIKEN cDNA 1110019N10 gene                                                                        | 8   | 107,163,739 | 107,165,628 | 11036                      | downstream                         | 6.00     |
| NM_022309                  | Cbfb          | core binding factor beta                                                                          | 8   | 107,694,574 | 107,741,886 | 54642                      | downstream                         | 6.00     |
| NM_145604                  | D230025D16Rik | RIKEN cDNA D230025D16 gene                                                                        | 8   | 107,749,205 | 107,776,953 | 11                         | in gene                            | 6.00     |
| NM_178879                  | C76566        | expressed sequence C76566                                                                         | 8   | 107,776,538 | 107,779,051 | -8309                      | upstream                           | 6.00     |
| NM_001033161               | Tradd         | TNFRSF1A-associated via death domain                                                              | 8   | 107,782,475 | 107,788,494 | 1134                       | in gene                            | 6.00     |
| NM_015821                  | Fbxl8         | F-box and leucine-rich repeat protein 8                                                           | 8   | 107,788,640 | 107,793,225 | -1280                      | upstream                           | 6.00     |
| NM_011939                  | Hsf4          | heat shock transcription factor 4                                                                 | 8   | 107,793,774 | 107,799,745 | -6414                      | upstream                           | 6.00     |
| NM_177699                  | Fhod1         | formin homology 2 domain containing 1                                                             | 8   | 107,853,065 | 107,871,831 | -217                       | upstream                           | 5.00     |
| NM_001081332               | Slc9a5        | solute carrier family 9 (sodium/hydrogen exchanger), member 5                                     | 8   | 107,872,158 | 107,893,781 | -110                       | upstream                           | 5.00     |
| NM_177150                  | Cenpt         | centromere protein T                                                                              | 8   | 108,368,578 | 108,375,908 | -3900                      | upstream                           | 7.00     |
| XM_001476693               | LOC100041617  | hypothetical protein LOC100041617                                                                 | 8   | 108,375,935 | 108,378,950 | -858                       | upstream                           | 7.00     |
| NM_021513                  | Thap11        | THAP domain containing 11                                                                         | 8   | 108,379,043 | 108,380,850 | 765                        | in gene                            | 7.00     |
| NM_026532                  | Nuff2         | nuclear transport factor 2                                                                        | 8   | 108,384,534 | 108,404,302 | -4726                      | upstream                           | 7.00     |
| NM_133792                  | Lypla3        | lysophospholipase 3                                                                               | 8   | 108,674,299 | 108,688,615 | 53, 18629                  | in gene, downstream                | 5.00     |
| NM_178798                  | Slc7a6        | solute carrier family 7 (cationic amino acid transporter, y+ system), member 6                    | 8   | 108,692,775 | 108,722,604 | 153                        | in gene                            | 5.00     |
| NM_009864                  | Cdh1          | cadherin 1                                                                                        | 8   | 109,127,268 | 109,194,146 | 43372                      | in gene                            | 5.00     |

| Accession No.                                                                    | Symbol        | Gene Title                                                                         | Chr | Gene Start  | Gene End    | Interval Dists to Start | Interval Pos              | Avg Peak |
|----------------------------------------------------------------------------------|---------------|------------------------------------------------------------------------------------|-----|-------------|-------------|-------------------------|---------------------------|----------|
| NM_173037                                                                        | Tmco7         | transmembrane and coiled-coil domains 7                                            | 8   | 109,206,968 | 109,375,339 | 104, 4232               | in gene, in gene          | 7.50     |
| XM_134291                                                                        | EG234703      | predicted gene, EG234703                                                           | 8   | 109,451,587 | 109,452,355 | -7293                   | upstream                  | 7.00     |
| NM_009229                                                                        | Sntb2         | syntrophin, basic 2                                                                | 8   | 109,459,650 | 109,538,092 | -2                      | upstream                  | 7.00     |
| XM_001479484,<br>XM_001479493                                                    | LOC100042791  | similar to ribosomal protein                                                       | 8   | 109,786,616 | 109,799,353 | 11449                   | in gene                   | 7.00     |
| NM_018823,<br>NM_133957                                                          | Nfat5         | nuclear factor of activated T-cells 5                                              | 8   | 109,817,762 | 109,903,417 | -482                    | upstream                  | 5.00     |
| NM_010817                                                                        | Psmd7         | proteasome (prosome, macropain) 26S subunit, non-ATPase, 7                         | 8   | 110,104,281 | 110,112,382 | 222                     | in gene                   | 5.00     |
| XM_001476934                                                                     | LOC100041744  | hypothetical protein LOC100041744                                                  | 8   | 110,196,656 | 110,390,197 | 12896                   | in gene                   | 6.00     |
| XM_001479588                                                                     | LOC100042829  | hypothetical protein LOC100042829                                                  | 8   | 111,901,750 | 111,964,490 | 9370                    | in gene                   | 4.00     |
| NM_019938                                                                        | Pmfbp1        | polyamine modulated factor 1 binding protein 1                                     | 8   | 112,017,927 | 112,066,540 | 49337                   | downstream                | 7.00     |
| NM_178380                                                                        | Dhx38         | DEAH (Asp-Glu-Ala-His) box polypeptide 38                                          | 8   | 112,071,924 | 112,089,501 | 22237, 5325             | downstream, in gene       | 6.00     |
| NM_175646                                                                        | Txn14b        | thioredoxin-like 4B                                                                | 8   | 112,089,905 | 112,097,939 | -5729                   | upstream                  | 5.00     |
| NM_028018                                                                        | 2400003C14Rik | RIKEN cDNA 2400003C14 gene                                                         | 8   | 112,195,229 | 112,217,164 | -116                    | upstream                  | 7.00     |
| NM_029468                                                                        | 4930566A11Rik | RIKEN cDNA 4930566A11 gene                                                         | 8   | 112,229,988 | 112,248,832 | 20908                   | downstream                | 8.00     |
| NM_001080930                                                                     | D8ErtD587e    | DNA segment, Chr 8, ERATO Doi 587, expressed                                       | 8   | 112,250,351 | 112,261,639 | 10743                   | in gene                   | 8.00     |
| XM_146511,<br>XM_916673                                                          | Phlpp1        | PH domain and leucine rich repeat protein phosphatase-like                         | 8   | 112,392,447 | 112,464,808 | 625                     | in gene                   | 4.00     |
| NM_146216                                                                        | Vac14         | Vac14 homolog (S. cerevisiae)                                                      | 8   | 113,142,538 | 113,244,298 | 69334, 87318            | in gene, in gene          | 6.00     |
| NM_009179,<br>NM_178048                                                          | St3gal2       | ST3 beta-galactoside alpha-2,3-sialyltransferase 2                                 | 8   | 113,443,822 | 113,495,457 | -398                    | upstream                  | 6.00     |
| NM_181549                                                                        | Mrc1          | mannose receptor-like precursor                                                    | 8   | 113,582,820 | 113,605,988 | 436                     | in gene                   | 6.00     |
| NM_133206                                                                        | Znrf1         | zinc and ring finger 1                                                             | 8   | 114,060,742 | 114,147,678 | 73610                   | in gene                   | 5.00     |
| NM_009954                                                                        | Bcar1         | breast cancer anti-estrogen resistance 1                                           | 8   | 114,234,374 | 114,267,709 | 15421                   | in gene                   | 9.00     |
| NM_011801                                                                        | Cfdp1         | craniofacial development protein 1                                                 | 8   | 114,292,373 | 114,378,210 | 83106                   | in gene                   | 6.00     |
| NM_173016                                                                        | AI427515      | expressed sequence AI427515                                                        | 8   | 116,729,540 | 116,897,970 | 5004                    | in gene                   | 6.00     |
| NM_026844                                                                        | 2310061C15Rik | RIKEN cDNA 2310061C15 gene                                                         | 8   | 119,412,585 | 119,445,336 | 27816                   | in gene                   | 6.00     |
| NM_001081151                                                                     | Gan           | giant axonal neuropathy                                                            | 8   | 119,682,035 | 119,729,086 | -243                    | upstream                  | 8.00     |
| XM_001004724,<br>XM_924798                                                       | 4933407C03Rik | RIKEN cDNA 4933407C03 gene                                                         | 8   | 119,780,993 | 119,985,406 | 75455, 132447, 177320   | in gene, in gene, in gene | 6.00     |
| NM_054095                                                                        | Efcfbp2       | EF hand calcium binding protein 2                                                  | 8   | 121,970,619 | 121,996,535 | 14789                   | in gene                   | 8.00     |
| NM_001009950                                                                     | Gm587         | gene model 587, (NCBI)                                                             | 8   | 122,003,502 | 122,025,598 | 7134                    | in gene                   | 4.00     |
| NM_026648                                                                        | Lrrc50        | leucine rich repeat containing 50                                                  | 8   | 122,099,135 | 122,122,354 | 26369                   | downstream                | 7.00     |
| NM_021441                                                                        | Taf1c         | TATA box binding protein (Tbp)-associated factor, RNA polymerase I, C              | 8   | 122,121,874 | 122,129,140 | 3636                    | in gene                   | 7.00     |
| XM_895061                                                                        | EG628061      | predicted gene, EG628061                                                           | 8   | 122,126,000 | 122,126,551 | 1047                    | downstream                | 7.00     |
| NM_023395                                                                        | Wfdc1         | WAP four-disulfide core domain 1                                                   | 8   | 122,190,265 | 122,211,920 | 31063                   | downstream                | 6.00     |
| XM_486167,<br>XM_917337                                                          | Atp2c2        | ATPase, Ca++ transporting, type 2C, member 2                                       | 8   | 122,223,909 | 122,281,618 | -2581                   | upstream                  | 6.00     |
| NM_028071                                                                        | Cot1          | coactosin-like 1 (Dictyostelium)                                                   | 8   | 122,333,125 | 122,364,440 | 41448                   | downstream                | 7.00     |
| NM_009462                                                                        | Usp10         | ubiquitin specific peptidase 10                                                    | 8   | 122,434,752 | 122,481,457 | -8720                   | upstream                  | 6.00     |
| NM_198671                                                                        | Gse1          | genetic suppressor element 1                                                       | 8   | 123,012,766 | 123,105,277 | 64626                   | in gene                   | 5.00     |
| XM_001477969                                                                     | LOC100042333  | similar to Ubif protein                                                            | 8   | 123,563,570 | 123,589,605 | -8939                   | upstream                  | 5.00     |
| NM_172761                                                                        | Mthfsd        | methylenetetrahydrofolate synthetase domain containing                             | 8   | 123,621,840 | 123,632,218 | -9894                   | upstream                  | 8.00     |
| NM_013519                                                                        | Foxc2         | forkhead box C2                                                                    | 8   | 123,640,483 | 123,642,795 | 1629                    | in gene                   | 8.00     |
| NM_008024                                                                        | Foxl1         | forkhead box L1                                                                    | 8   | 123,651,585 | 123,654,544 | -9473                   | upstream                  | 8.00     |
| NM_080855                                                                        | Zchc14        | zinc finger, CCHC domain containing 14                                             | 8   | 124,123,368 | 124,175,833 | 14329                   | in gene                   | 6.00     |
| NM_145605                                                                        | Klhdc4        | kelch domain containing 4                                                          | 8   | 124,320,230 | 124,353,469 | 23261, -67              | in gene, upstream         | 4.50     |
| NM_011404                                                                        | Slc7a5        | solute carrier family 7 (cationic amino acid transporter, y+ system), member 5     | 8   | 124,405,050 | 124,431,571 | 34963, 32467            | downstream, downstream    | 8.00     |
| XM_001001798,<br>XM_111398                                                       | Gm22          | gene model 22, (NCBI)                                                              | 8   | 124,783,967 | 124,796,550 | 209                     | in gene                   | 5.00     |
| NM_026014                                                                        | Cdt1          | chromatin licensing and DNA replication factor 1                                   | 8   | 125,091,915 | 125,097,030 | 3989                    | in gene                   | 7.00     |
| NM_009698                                                                        | Aprt          | adenine phosphoribosyl transferase                                                 | 8   | 125,098,537 | 125,100,807 | 4903                    | downstream                | 7.00     |
| NM_016722                                                                        | Galns         | galactosamine (N-acetyl)-6-sulfate sulfatase                                       | 8   | 125,102,141 | 125,135,241 | 39337                   | downstream                | 7.00     |
| NM_054046                                                                        | Def8          | differentially expressed in FDCP 8                                                 | 8   | 125,966,886 | 125,987,799 | -390                    | upstream                  | 7.00     |
| NM_009606                                                                        | Acta1         | actin, alpha 1, skeletal muscle                                                    | 8   | 126,415,667 | 126,418,636 | 2348                    | in gene                   | 5.00     |
| NM_172288                                                                        | Nup133        | nucleoporin 133                                                                    | 8   | 126,423,200 | 126,482,325 | 66037                   | downstream                | 5.00     |
| NM_133966                                                                        | Taf5l         | TAF5-like RNA polymerase II, p300/CBP-associated factor (PCAF)-associated factor   | 8   | 126,520,210 | 126,545,209 | -71                     | upstream                  | 7.00     |
| NM_001029876                                                                     | AK122209      | cDNA sequence AK122209                                                             | 8   | 126,547,373 | 126,572,404 | -2093                   | upstream                  | 7.00     |
| NM_139272                                                                        | Galnt2        | UDP-N-acetyl-alpha-D-galactosamine:polypeptide N-acetylgalactosaminyltransferase 2 | 8   | 126,755,294 | 126,869,622 | 19570                   | in gene                   | 6.00     |
| NM_171824                                                                        | Pgbd5         | piggyBac transposable element derived 5                                            | 8   | 126,892,949 | 126,957,836 | 63500                   | in gene                   | 5.00     |
| NM_145607                                                                        | Ttc13         | tetratricopeptide repeat domain 13                                                 | 8   | 127,195,227 | 127,245,875 | -2205                   | upstream                  | 5.00     |
| NM_026855                                                                        | Arv1          | ARV1 homolog (yeast)                                                               | 8   | 127,246,039 | 127,258,023 | 2041                    | in gene                   | 5.00     |
| NM_001081120                                                                     | 2310031A18Rik | RIKEN cDNA 2310031A18 gene                                                         | 8   | 127,264,157 | 127,275,709 | -1955                   | upstream                  | 6.00     |
| XM_001480316,<br>XM_001480318,<br>XM_001480431,<br>XM_001480436,<br>XM_001480440 | Trim67        | tripartite motif-containing 67                                                     | 8   | 127,317,652 | 127,353,278 | -420                    | upstream                  | 7.00     |
| NM_008737                                                                        | Nrp1          | neuropilin 1                                                                       | 8   | 130,883,140 | 131,027,247 | 3388                    | in gene                   | 5.00     |
| NM_007465                                                                        | Birc2         | baculoviral IAP repeat-containing 2                                                | 9   | 7,818,227   | 7,835,255   | -1785                   | upstream                  | 8.00     |

| Accession No.                         | Symbol        | Gene Title                                                                                        | Chr | Gene Start | Gene End   | Interval Dists to Start | Interval Pos                        | Avg Peak |
|---------------------------------------|---------------|---------------------------------------------------------------------------------------------------|-----|------------|------------|-------------------------|-------------------------------------|----------|
| NM_008829                             | Pgr           | progesterone receptor                                                                             | 9   | 8,899,833  | 8,968,611  | 70567                   | downstream                          | 8.00     |
| XM_146632,<br>XM_984736               | 9030420J04Rik | RIKEN cDNA 9030420J04 gene                                                                        | 9   | 8,994,328  | 9,239,101  | 95629                   | in gene                             | 6.00     |
| XM_001473154,<br>XM_001481278         | Maml2         | mastermind like 2 (Drosophila)                                                                    | 9   | 13,415,221 | 13,513,977 | 89603                   | in gene                             | 4.00     |
| NM_028013                             | Endod1        | endonuclease domain containing 1                                                                  | 9   | 14,158,450 | 14,185,436 | -340                    | upstream                            | 4.00     |
| NM_010242                             | Fut4          | fucosyltransferase 4                                                                              | 9   | 14,552,903 | 14,556,566 | 86                      | in gene                             | 6.00     |
| NM_029306                             | 1700012B09Rik | RIKEN cDNA 1700012B09 gene                                                                        | 9   | 14,562,644 | 14,575,474 | 18994                   | downstream                          | 6.00     |
| XM_001474439                          | LOC100040375  | similar to KIAA1731 protein                                                                       | 9   | 15,150,527 | 15,162,232 | -8280                   | upstream                            | 4.00     |
| NM_001002846,<br>NM_013911            | Fbxl12        | F-box and leucine-rich repeat protein 12                                                          | 9   | 20,442,230 | 20,449,211 | -7621                   | upstream                            | 5.00     |
| NM_025401                             | Ubl5          | ubiquitin-like 5                                                                                  | 9   | 20,447,762 | 20,451,233 | 9070                    | downstream                          | 5.00     |
| NM_023371                             | Pin1          | protein (peptidyl-prolyl cis/trans isomerase) NIMA-interacting 1                                  | 9   | 20,456,574 | 20,471,028 | 258, 5842               | in gene, in gene                    | 5.50     |
| NM_173777                             | Olfm2         | olfactomedin 2                                                                                    | 9   | 20,472,144 | 20,532,673 | 70257                   | downstream                          | 6.00     |
| NM_018793                             | Tyk2          | tyrosine kinase 2                                                                                 | 9   | 20,908,512 | 20,935,719 | 16295                   | in gene                             | 5.00     |
| NM_016679                             | Keap1         | kelch-like ECH-associated protein 1                                                               | 9   | 21,034,511 | 21,043,257 | 57, -5127               | in gene, upstream                   | 4.50     |
| NM_053190                             | Edg8          | endothelial differentiation, sphingolipid G-protein-coupled receptor, 8                           | 9   | 21,047,361 | 21,050,653 | 7453, 2269              | downstream, in gene                 | 4.50     |
| NM_001039520                          | Dnm2          | dynamin 2                                                                                         | 9   | 21,229,389 | 21,311,568 | -45                     | upstream                            | 8.00     |
| NM_011417                             | Smarca4       | SWI/SNF related, matrix associated, actin dependent regulator of chromatin, subfamily a, member 4 | 9   | 21,420,613 | 21,507,811 | 59                      | in gene                             | 6.00     |
| NM_010700                             | Ldlr          | low density lipoprotein receptor                                                                  | 9   | 21,528,038 | 21,554,363 | -198                    | upstream                            | 5.00     |
| NM_010487                             | Elavl3        | ELAV (embryonic lethal, abnormal vision, Drosophila)-like 3 (Hu antigen C)                        | 9   | 21,822,220 | 21,856,454 | -4106                   | upstream                            | 5.00     |
| NM_177318                             | Zfp653        | zinc finger protein 653                                                                           | 9   | 21,859,904 | 21,875,789 | 15229                   | in gene                             | 5.00     |
| NM_181316                             | Bbs9          | Bardet-Biedl syndrome 9                                                                           | 9   | 22,280,159 | 22,692,724 | 302129                  | in gene                             | 5.00     |
| NM_028472                             | Bmper         | BMP-binding endothelial regulator                                                                 | 9   | 23,027,520 | 23,289,646 | 177008                  | in gene                             | 7.00     |
| NM_026189                             | 2310005P05Rik | RIKEN cDNA 2310005P05 gene                                                                        | 9   | 25,289,182 | 25,411,695 | 45714                   | in gene                             | 7.00     |
| NM_172290                             | Hnt           | neurotrimin                                                                                       | 9   | 28,803,549 | 29,770,714 | 168234, 113034          | in gene, in gene                    | 5.50     |
| NM_001080817                          | Prdm10        | PR domain containing 10                                                                           | 9   | 31,122,692 | 31,186,128 | 71420                   | downstream                          | 4.00     |
| NM_172766                             | Nfrkb         | nuclear factor related to kappa B binding protein                                                 | 9   | 31,193,798 | 31,228,918 | 314                     | in gene                             | 4.00     |
| NM_013800                             | Barx2         | BarH-like homeobox 2                                                                              | 9   | 31,653,865 | 31,720,658 | 63618                   | in gene                             | 6.00     |
| NM_183171                             | Fez1          | fasciculation and elongation protein zeta 1 (zygin I)                                             | 9   | 36,640,394 | 36,686,507 | 10678                   | in gene                             | 7.00     |
| NM_175189                             | Hepacam       | hepatocyte cell adhesion molecule                                                                 | 9   | 37,175,191 | 37,194,157 | 17129                   | in gene                             | 7.00     |
| NM_133733                             | 9030425E11Rik | RIKEN cDNA 9030425E11 gene                                                                        | 9   | 40,494,047 | 40,592,129 | 45105                   | in gene                             | 7.00     |
| NM_173038                             | Tbcel         | tubulin folding cofactor E-like                                                                   | 9   | 42,220,400 | 42,280,309 | 13941                   | in gene                             | 6.00     |
| NM_175481                             | Grik4         | glutamate receptor, ionotropic, kainate 4                                                         | 9   | 42,328,517 | 42,752,454 | 411550                  | in gene                             | 4.00     |
| NM_027144                             | Arhgef12      | Rho guanine nucleotide exchange factor (GEF) 12                                                   | 9   | 42,771,925 | 42,913,801 | 102386                  | in gene                             | 4.00     |
| XM_001001707,<br>XM_001479244         | D630033O11Rik | RIKEN cDNA D630033O11 gene                                                                        | 9   | 43,067,962 | 43,088,149 | 4310                    | in gene                             | 6.00     |
| NM_023655                             | Trim29        | tripartite motif protein 29                                                                       | 9   | 43,119,614 | 43,144,208 | 17986                   | in gene                             | 6.00     |
| NM_016808,<br>NM_198091,<br>NM_198092 | Usp2          | ubiquitin specific peptidase 2                                                                    | 9   | 43,875,104 | 43,903,710 | -64, 1221, 9936, 16704  | upstream, in gene, in gene, in gene | 6.00     |
| NM_030256                             | Bcl9l         | B-cell CLL/lymphoma 9-like                                                                        | 9   | 44,307,219 | 44,318,506 | -19, 5869               | upstream, in gene                   | 6.50     |
| NM_007551                             | Blr1          | Burkitt lymphoma receptor 1                                                                       | 9   | 44,319,980 | 44,334,504 | 21416                   | downstream                          | 6.00     |
| NM_007841,<br>NM_181324               | Ddx6          | DEAD (Asp-Glu-Ala-Asp) box polypeptide 6                                                          | 9   | 44,412,981 | 44,445,189 | -1173                   | upstream                            | 7.00     |
| NM_153537                             | Phldb1        | pleckstrin homology-like domain, family B, member 1                                               | 9   | 44,494,391 | 44,543,277 | -2131                   | upstream                            | 8.00     |
| NM_145985                             | Arcn1         | archain 1                                                                                         | 9   | 44,549,651 | 44,575,880 | 30472, -56              | downstream, upstream                | 6.50     |
| NM_023831                             | 1500035H01Rik | RIKEN cDNA 1500035H01 gene                                                                        | 9   | 44,581,092 | 44,600,797 | -5156                   | upstream                            | 5.00     |
| NM_001014761                          | Scn2b         | sodium channel, voltage-gated, type II, beta                                                      | 9   | 44,925,959 | 44,938,153 | 18201                   | downstream                          | 6.00     |
| NM_001013390                          | Scn4b         | sodium channel, type IV, beta                                                                     | 9   | 44,947,125 | 44,962,144 | -2965                   | upstream                            | 6.00     |
| NM_007503,<br>NM_052823               | Fxyd2         | FXYD domain-containing ion transport regulator 2                                                  | 9   | 45,211,221 | 45,218,361 | 4795                    | in gene                             | 5.00     |
| NM_001033324                          | Zbtb16        | zinc finger and BTB domain containing 16                                                          | 9   | 48,462,402 | 48,644,050 | 98290, -2529            | in gene, upstream                   | 5.50     |
| XM_196479,<br>XM_924862               | Gm684         | gene model 684, (NCBI)                                                                            | 9   | 51,078,363 | 51,086,470 | -3322                   | upstream                            | 5.00     |
| XM_134800,<br>XM_917087               | 1810046K07Rik | RIKEN cDNA 1810046K07 gene                                                                        | 9   | 51,097,789 | 51,137,022 | 47230                   | downstream                          | 5.00     |
| NM_175535                             | Arhgap20      | Rho GTPase activating protein 20                                                                  | 9   | 51,573,457 | 51,661,164 | 7343                    | in gene                             | 4.00     |
| XM_001481328,<br>XM_284494            | Ddx10         | DEAD (Asp-Glu-Ala-Asp) box polypeptide 10                                                         | 9   | 52,906,559 | 53,064,488 | 14696                   | in gene                             | 5.00     |
| NM_028060                             | Slc35f2       | solute carrier family 35, member F2                                                               | 9   | 53,619,345 | 53,665,963 | 14703                   | in gene                             | 5.00     |
| XM_358382,<br>XM_917435               | Dmxl2         | Dmx-like 2                                                                                        | 9   | 54,212,965 | 54,349,886 | 134990                  | in gene                             | 6.00     |
| NM_172924                             | C230081A13Rik | RIKEN cDNA C230081A13 gene                                                                        | 9   | 56,075,516 | 56,265,845 | -32                     | upstream                            | 9.00     |
| NM_025812                             | Hmg20a        | high mobility group 20A                                                                           | 9   | 56,266,653 | 56,344,743 | -776                    | upstream                            | 9.00     |
| NM_028636                             | Man2c1        | mannosidase, alpha, class 2C, member 1                                                            | 9   | 56,978,584 | 56,990,017 | 9400                    | in gene                             | 5.00     |
| NM_028347                             | Nei1          | nei endonuclease VIII-like 1 (E. coli)                                                            | 9   | 56,991,063 | 56,994,841 | 6857                    | downstream                          | 5.00     |
| NM_007713                             | Clk3          | CDC-like kinase 3                                                                                 | 9   | 57,598,518 | 57,613,667 | -829                    | upstream                            | 5.00     |
| NM_012043                             | Islr          | immunoglobulin superfamily containing leucine-rich repeat                                         | 9   | 58,004,076 | 58,006,949 | -5899                   | upstream                            | 6.00     |

| Accession No.                                          | Symbol        | Gene Title                                                                                          | Chr | Gene Start  | Gene End    | Interval Dists to Start           | Interval Pos                          | Avg Peak |
|--------------------------------------------------------|---------------|-----------------------------------------------------------------------------------------------------|-----|-------------|-------------|-----------------------------------|---------------------------------------|----------|
| NM_001081192                                           | Hcn4          | hyperpolarization-activated, cyclic nucleotide-gated K+ 4                                           | 9   | 58,671,319  | 58,708,762  | 35854                             | in gene                               | 5.00     |
| NM_001040426,<br>NM_172444                             | Thsd4         | thrombospondin, type I, domain containing 4                                                         | 9   | 59,817,516  | 60,358,842  | 471898, 423578, 378474,<br>276618 | in gene, in gene, in<br>gene, in gene | 6.50     |
| XM_001475306                                           | LOC100040481  | hypothetical protein LOC100040481                                                                   | 9   | 61,218,604  | 61,220,000  | 3444                              | downstream                            | 6.00     |
| NM_009389                                              | Tle3          | transducin-like enhancer of split 3, homolog of Drosophila E(spl)                                   | 9   | 61,221,479  | 61,264,791  | 569                               | in gene                               | 6.00     |
| XM_001473665                                           | LOC100039851  | similar to Hmgb1 protein                                                                            | 9   | 61,320,398  | 61,321,719  | 5735                              | downstream                            | 5.00     |
| NM_009672                                              | Anp32a        | acidic (leucine-rich) nuclear phosphoprotein 32 family, member A                                    | 9   | 62,189,235  | 62,226,609  | 2221                              | in gene                               | 6.00     |
| NM_176922                                              | Itga11        | integrin, alpha 11                                                                                  | 9   | 62,525,668  | 62,631,767  | 66732                             | in gene                               | 8.00     |
| NM_010193                                              | Fem1b         | feminization 1 homolog b (C. elegans)                                                               | 9   | 62,639,628  | 62,659,409  | -9919                             | upstream                              | 6.00     |
| NM_138304                                              | Calml4        | calmodulin-like 4                                                                                   | 9   | 62,705,911  | 62,723,725  | -215, 3449                        | upstream, in gene                     | 5.00     |
| NM_011840                                              | Map2k5        | mitogen activated protein kinase kinase 5                                                           | 9   | 63,011,577  | 63,225,659  | 40987                             | in gene                               | 6.00     |
| XM_001475908,<br>XM_134960,<br>XM_917939,<br>XM_925370 | lqch          | IQ motif containing H                                                                               | 9   | 63,269,256  | 63,450,300  | 176892                            | in gene                               | 5.00     |
| NM_017382                                              | Rab11a        | RAB11a, member RAS oncogene family                                                                  | 9   | 64,563,107  | 64,585,563  | 987, 59                           | in gene, in gene                      | 6.00     |
| NM_028906                                              | Dpp8          | dipeptidylpeptidase 8                                                                               | 9   | 64,880,265  | 64,930,458  | 58295                             | downstream                            | 4.00     |
| NM_028030                                              | Rbpms2        | RNA binding protein with multiple splicing 2                                                        | 9   | 65,478,389  | 65,508,325  | 18363                             | in gene                               | 6.00     |
| NM_010019                                              | Dapk2         | death-associated kinase 2                                                                           | 9   | 66,006,072  | 66,120,049  | -88                               | upstream                              | 6.00     |
| XM_001477062,<br>XM_918072                             | Herc1         | hect (homologous to the E6-AP (UBE3A) carboxyl terminus) domain and RCC1 (CHC1)-like domain (RLD) 1 | 9   | 66,198,331  | 66,358,856  | 116901                            | in gene                               | 5.00     |
| NM_024427                                              | Tpm1          | tropomyosin 1, alpha                                                                                | 9   | 66,870,400  | 66,897,020  | 5180                              | in gene                               | 5.00     |
| NM_001081242                                           | Tln2          | talín 2                                                                                             | 9   | 67,065,943  | 67,387,422  | -9741                             | upstream                              | 6.00     |
| XM_001474360                                           | LOC100040253  | hypothetical protein LOC100040253                                                                   | 9   | 67,407,144  | 67,547,969  | 150806                            | downstream                            | 6.00     |
| XM_001004247,<br>XM_001004252,<br>XM_146937            | EG244911      | predicted gene, EG244911                                                                            | 9   | 67,678,296  | 67,679,635  | 51                                | in gene                               | 6.00     |
| NM_177184                                              | Vps13c        | vacuolar protein sorting 13C (yeast)                                                                | 9   | 67,688,203  | 67,843,441  | -8619                             | upstream                              | 6.00     |
| NM_013646                                              | Rora          | RAR-related orphan receptor alpha                                                                   | 9   | 68,501,609  | 69,226,838  | 461735                            | in gene                               | 6.00     |
| NM_007585                                              | Anxa2         | annexin A2                                                                                          | 9   | 69,301,490  | 69,339,592  | 4430                              | in gene                               | 6.00     |
| NM_172772                                              | B230380D07Rik | RIKEN cDNA B230380D07 gene                                                                          | 9   | 70,446,821  | 70,504,981  | -27                               | upstream                              | 5.00     |
| XM_001477924                                           | LOC100041622  | similar to RIKEN cDNA 1110014J01 gene                                                               | 9   | 70,700,355  | 70,702,290  | 10888                             | downstream                            | 6.00     |
| NM_026599                                              | Cgnl1         | cingulin-like 1                                                                                     | 9   | 71,474,316  | 71,619,409  | 124337, 123089, 95585,<br>46193   | in gene, in gene, in<br>gene, in gene | 6.75     |
| NM_008613                                              | Mns1          | meiosis-specific nuclear structural protein 1                                                       | 9   | 72,266,685  | 72,306,381  | 19443                             | in gene                               | 6.00     |
| NM_175485                                              | Prtg          | protogenin homolog (Gallus gallus)                                                                  | 9   | 72,655,020  | 72,762,834  | 308, 75316                        | in gene, in gene                      | 5.50     |
| NM_010864                                              | Myo5a         | myosin Va                                                                                           | 9   | 74,919,013  | 75,071,495  | 126107                            | in gene                               | 6.00     |
| NM_205844                                              | Gfrr1         | GDNF family receptor alpha like                                                                     | 9   | 76,011,909  | 76,061,464  | 40504                             | in gene                               | 6.00     |
| NM_172528                                              | Lrrc1         | leucine rich repeat containing 1                                                                    | 9   | 77,278,896  | 77,391,866  | -870                              | upstream                              | 5.00     |
| NM_001081490,<br>NM_023605                             | Fbxo9         | f-box protein 9                                                                                     | 9   | 77,929,306  | 77,956,860  | -4308                             | upstream                              | 6.00     |
| NM_019987                                              | Ick           | intestinal cell kinase                                                                              | 9   | 77,961,216  | 78,015,749  | -48                               | upstream                              | 6.00     |
| NM_133718                                              | Tmem30a       | transmembrane protein 30A                                                                           | 9   | 79,616,756  | 79,641,237  | 21                                | in gene                               | 7.00     |
| XM_001476043                                           | LOC100041249  | hypothetical protein LOC100041249                                                                   | 9   | 79,996,241  | 80,015,835  | 25263                             | downstream                            | 5.00     |
| NM_001039546                                           | Myo6          | myosin VI                                                                                           | 9   | 80,012,847  | 80,159,536  | 8657                              | in gene                               | 5.00     |
| NM_022986                                              | Irak1bp1      | interleukin-1 receptor-associated kinase 1 binding protein 1                                        | 9   | 82,723,606  | 82,741,293  | 8010                              | in gene                               | 6.00     |
| NM_001081216                                           | Phip          | pleckstrin homology domain interacting protein                                                      | 9   | 82,759,766  | 82,869,096  | 26440, 1064                       | in gene, in gene                      | 5.00     |
| NM_172926                                              | Snx14         | sorting nexin 14                                                                                    | 9   | 88,271,613  | 88,333,767  | 103                               | in gene                               | 7.00     |
| NM_019666,<br>NM_019796                                | Syncrip       | synaptotagmin binding, cytoplasmic RNA interacting protein                                          | 9   | 88,344,576  | 88,377,235  | 1283                              | in gene                               | 6.00     |
| NM_007801                                              | Ctsh          | cathepsin H                                                                                         | 9   | 89,949,347  | 89,970,927  | 28605                             | downstream                            | 6.00     |
| NM_001039147,<br>NM_024431                             | Morf4l1       | mortality factor 4 like 1                                                                           | 9   | 89,986,507  | 90,009,600  | 31648                             | downstream                            | 6.00     |
| NM_009576                                              | Zic4          | zinc finger protein of the cerebellum 4                                                             | 9   | 91,263,810  | 91,284,186  | 13182                             | in gene                               | 6.00     |
| NM_177909                                              | Slc9a9        | solute carrier family 9 (sodium/hydrogen exchanger), isoform 9                                      | 9   | 94,570,337  | 95,130,864  | -10089, 199359                    | upstream, in gene                     | 5.50     |
| NM_018763                                              | Chst2         | carbohydrate sulfotransferase 2                                                                     | 9   | 95,304,920  | 95,307,141  | 48                                | in gene                               | 5.00     |
| NM_011916                                              | Xrn1          | 5'-3' exoribonuclease 1                                                                             | 9   | 95,855,179  | 95,953,453  | 21                                | in gene                               | 7.00     |
| NM_007502                                              | Atp1b3        | ATPase, Na+/K+ transporting, beta 3 polypeptide                                                     | 9   | 96,233,092  | 96,264,718  | -178                              | upstream                              | 6.00     |
| NM_177770                                              | BC043934      | cDNA sequence BC043934                                                                              | 9   | 96,336,223  | 96,338,557  | 29                                | in gene                               | 8.00     |
| NM_053268                                              | Rasa2         | RAS p21 protein activator 2                                                                         | 9   | 96,439,719  | 96,531,922  | 530                               | in gene                               | 6.00     |
| NM_138756                                              | Slc25a36      | solute carrier family 25, member 36                                                                 | 9   | 96,977,430  | 97,011,460  | 228                               | in gene                               | 7.00     |
| XM_001474396,<br>XM_001475836                          | 3222402P14Rik | RIKEN cDNA 3222402P14 gene                                                                          | 9   | 101,004,294 | 101,154,125 | -51                               | upstream                              | 10.00    |
| NM_173447                                              | Ephb1         | Eph receptor B1                                                                                     | 9   | 101,824,458 | 102,256,963 | 350915                            | in gene                               | 6.00     |
| NM_001042607,<br>NM_013649                             | Ryk           | receptor-like tyrosine kinase                                                                       | 9   | 102,737,250 | 102,810,637 | 23678                             | in gene                               | 4.00     |
| NM_033314                                              | Slco2a1       | solute carrier organic anion transporter family, member 2a1                                         | 9   | 102,910,819 | 102,990,179 | 70125                             | in gene                               | 6.00     |
| NM_001002896                                           | Bfsp2         | beaded filament structural protein 2, phakinin                                                      | 9   | 103,327,254 | 103,382,658 | 8274                              | in gene                               | 6.00     |
| NM_172461                                              | Nek11         | NIMA (never in mitosis gene a)-related expressed kinase 11                                          | 9   | 105,064,797 | 105,297,573 | 43381                             | in gene                               | 5.00     |
| NM_172927                                              | E330026B02Rik | RIKEN cDNA E330026B02 gene                                                                          | 9   | 105,676,442 | 105,711,978 | 40149                             | downstream                            | 4.00     |

| Accession No.                 | Symbol        | Gene Title                                                                              | Chr | Gene Start  | Gene End    | Interval Dists to Start | Interval Pos              | Avg Peak |
|-------------------------------|---------------|-----------------------------------------------------------------------------------------|-----|-------------|-------------|-------------------------|---------------------------|----------|
| NM_026763                     | 1110001D15Rik | RIKEN cDNA 1110001D15 gene                                                              | 9   | 105,891,785 | 105,974,567 | -5881                   | upstream                  | 8.00     |
| XM_135109,<br>XM_920961       | Wdr82         | WD repeat domain containing 82                                                          | 9   | 106,073,257 | 106,095,321 | 6967                    | in gene                   | 5.00     |
|                               | Mirlet7g      | microRNA let7g                                                                          | 9   | 106,081,170 | 106,081,257 | -946                    | upstream                  | 5.00     |
| NM_027354                     | Wdr51a        | WD repeat domain 51A                                                                    | 9   | 106,183,732 | 106,252,208 | 72316                   | downstream                | 6.00     |
| NM_153459                     | Dusp7         | dual specificity phosphatase 7                                                          | 9   | 106,270,963 | 106,278,052 | 13165                   | downstream                | 5.00     |
| NM_145619                     | Parp3         | poly (ADP-ribose) polymerase family, member 3                                           | 9   | 106,372,684 | 106,378,982 | -431                    | upstream                  | 5.00     |
| NM_145620                     | Rrp9          | RRP9, small subunit (SSU) processome component, homolog (yeast)                         | 9   | 106,379,640 | 106,387,746 | -227                    | upstream                  | 5.00     |
| XM_001475846                  | LOC100041128  | similar to TAF4A RNA polymerase II, TATA box binding protein (TBP)-associated factor    | 9   | 106,689,090 | 106,725,106 | 17218, 130              | in gene, in gene          | 6.00     |
| NM_020263                     | Cacna2d2      | calcium channel, voltage-dependent, alpha 2/delta subunit 2                             | 9   | 107,301,943 | 107,431,389 | 9225, 126985            | in gene, in gene          | 6.00     |
| NM_019704                     | Tmem115       | transmembrane protein 115                                                               | 9   | 107,436,276 | 107,440,987 | -7348                   | upstream                  | 7.00     |
| NM_018879                     | Tusc4         | tumor suppressor candidate 4                                                            | 9   | 107,444,557 | 107,448,026 | 12723                   | downstream                | 7.00     |
| NM_053253                     | Zmynd10       | zinc finger, MYND domain containing 10                                                  | 9   | 107,449,641 | 107,453,650 | 7639                    | downstream                | 7.00     |
| NM_019713                     | Rassf1        | Ras association (RalGDS/AF-6) domain family 1                                           | 9   | 107,456,987 | 107,464,591 | 293, 14133              | in gene, downstream       | 7.00     |
| NM_019742                     | Tusc2         | tumor suppressor candidate 2                                                            | 9   | 107,465,586 | 107,468,439 | -8306, 5534             | upstream, downstream      | 7.00     |
| NM_010489                     | Hyal2         | hyaluronoglucosaminidase 2                                                              | 9   | 107,471,494 | 107,475,109 | -374                    | upstream                  | 7.00     |
| NM_008317                     | Hyal1         | hyaluronoglucosaminidase 1                                                              | 9   | 107,479,283 | 107,482,468 | -8163, 10605            | upstream, downstream      | 6.00     |
| NM_019750                     | Nat6          | N-acetyltransferase 6                                                                   | 9   | 107,482,501 | 107,486,379 | 7387                    | downstream                | 5.00     |
| NM_178020                     | Hyal3         | hyaluronoglucosaminidase 3                                                              | 9   | 107,483,638 | 107,489,690 | 6250                    | downstream                | 5.00     |
| NM_025903                     | Ifrd2         | interferon-related developmental regulator 2                                            | 9   | 107,490,049 | 107,495,369 | -161                    | upstream                  | 5.00     |
| NM_001081244                  | BY080835      | cDNA sequence BY080835                                                                  | 9   | 107,495,398 | 107,499,406 | 9518                    | downstream                | 5.00     |
| NM_011349                     | Sema3f        | sema domain, immunoglobulin domain (Ig), short basic domain, secreted, (semaphorin) 3 F | 9   | 107,583,833 | 107,612,806 | 7878, -6378             | in gene, upstream         | 5.00     |
| NM_028944                     | 4933406E20Rik | RIKEN cDNA 4933406E20 gene                                                              | 9   | 108,481,157 | 108,499,931 | 5115                    | in gene                   | 7.00     |
| NM_173019                     | Pfkfb4        | 6-phosphofructo-2-kinase/fructose-2,6-biphosphatase 4                                   | 9   | 108,893,947 | 108,934,739 | 46789                   | downstream                | 7.00     |
| NM_025858,<br>NM_026381       | Scotin        | scotin gene                                                                             | 9   | 108,941,141 | 108,960,280 | -405                    | upstream                  | 7.00     |
| XM_001481067,<br>XM_915629    | Lba1          | lupus brain antigen 1                                                                   | 9   | 111,214,243 | 111,298,279 | 80477                   | in gene                   | 5.00     |
| NM_009752                     | Glb1          | galactosidase, beta 1                                                                   | 9   | 114,310,237 | 114,383,495 | 30627                   | in gene                   | 7.00     |
| NM_001042503                  | Trim71        | tripartite motif-containing 71                                                          | 9   | 114,420,386 | 114,473,487 | 45295                   | in gene                   | 8.00     |
| NM_153585                     | Cnot10        | CCR4-NOT transcription complex, subunit 10                                              | 9   | 114,494,996 | 114,549,192 | -152                    | upstream                  | 8.00     |
| NM_148958                     | Osbpl10       | oxysterol binding protein-like 10                                                       | 9   | 114,976,397 | 115,141,341 | 21235                   | in gene                   | 7.00     |
| NM_133710                     | Ctdspl        | CTD (carboxy-terminal domain, RNA polymerase II, polypeptide A) small phosphatase-like  | 9   | 118,835,571 | 118,953,116 | 49453, 84813            | in gene, in gene          | 5.00     |
| XM_486268,<br>XM_916519       | Dlec1         | deleted in lung and esophageal cancer 1                                                 | 9   | 119,011,596 | 119,056,812 | 24660                   | in gene                   | 6.00     |
| NM_021544                     | Scn5a         | sodium channel, voltage-gated, type V, alpha                                            | 9   | 119,392,529 | 119,488,134 | 88726                   | in gene                   | 6.00     |
| NM_028976                     | Gorasp1       | golgi reassembly stacking protein 1                                                     | 9   | 119,834,791 | 119,846,676 | -1388                   | upstream                  | 4.00     |
| NM_028735                     | Ttc21a        | tetratricopeptide repeat domain 21A                                                     | 9   | 119,846,724 | 119,876,911 | 1340, 19724             | in gene, in gene          | 4.50     |
| NM_001081339                  | Cmya1         | cardiomyopathy associated 1                                                             | 9   | 119,923,383 | 119,928,933 | 8485                    | downstream                | 6.00     |
| NM_144557                     | Myrip         | myosin VIIA and Rab interacting protein                                                 | 9   | 120,213,191 | 120,383,952 | 84617, 139929           | in gene, in gene          | 5.50     |
| NM_026892                     | Eif1b         | eukaryotic translation initiation factor 1B                                             | 9   | 120,401,759 | 120,404,445 | -175                    | upstream                  | 6.00     |
| NM_178676                     | Entpd3        | ectonucleoside triphosphate diphosphohydrolase 3                                        | 9   | 120,448,961 | 120,477,435 | 34687                   | downstream                | 5.00     |
| NM_025974                     | Rpl14         | ribosomal protein L14                                                                   | 9   | 120,480,634 | 120,483,770 | 3014                    | in gene                   | 5.00     |
| XM_001473897,<br>XM_001477043 | 5830454E08Rik | RIKEN cDNA 5830454E08 gene                                                              | 9   | 120,486,316 | 120,487,190 | -2668                   | upstream                  | 5.00     |
| NM_007614                     | Ctnnb1        | catenin (cadherin associated protein), beta 1                                           | 9   | 120,842,593 | 120,869,625 | -49, 19679              | upstream, in gene         | 7.00     |
| XM_001479566,<br>XM_001481114 | Ulk4          | unc-51-like kinase 4 (C. elegans)                                                       | 9   | 120,982,789 | 121,186,592 | 210688                  | downstream                | 6.00     |
| NM_010918                     | Nktr          | natural killer tumor recognition sequence                                               | 9   | 121,628,299 | 121,665,959 | 42453                   | downstream                | 5.00     |
| NM_026179                     | Abhd5         | abhydrolase domain containing 5                                                         | 9   | 122,260,734 | 122,290,641 | 2                       | in gene                   | 6.00     |
| NM_001002267                  | Tmem158       | transmembrane protein 158                                                               | 9   | 123,168,175 | 123,169,907 | 8275                    | downstream                | 6.00     |
| NM_019958                     | Rgs17         | regulator of G-protein signaling 17                                                     | 10  | 4,424,183   | 4,514,266   | 98249                   | downstream                | 4.00     |
| NM_175374                     | Mtrf11        | mitochondrial translational release factor 1-like                                       | 10  | 4,522,598   | 4,534,654   | -166                    | upstream                  | 4.00     |
| XM_136914                     | Gm221         | gene model 221, (NCBI)                                                                  | 10  | 5,785,430   | 5,836,669   | 44237                   | in gene                   | 6.00     |
| NM_026141                     | Ppil4         | peptidylprolyl isomerase (cyclophilin)-like 4                                           | 10  | 7,512,719   | 7,542,933   | -111                    | upstream                  | 5.00     |
| NM_175155                     | Sash1         | SAM and SH3 domain containing 1                                                         | 10  | 8,442,017   | 8,605,868   | 100444, 66988, 65036    | in gene, in gene, in gene | 7.00     |
| NM_025799                     | Fuca2         | fucosidase, alpha-L- 2, plasma                                                          | 10  | 13,220,834  | 13,237,081  | 13662                   | in gene                   | 5.00     |
| NM_019961                     | Pex3          | peroxisomal biogenesis factor 3                                                         | 10  | 13,243,922  | 13,272,899  | 38403                   | downstream                | 5.00     |
| NM_001033432                  | Heca          | headcase homolog (Drosophila)                                                           | 10  | 17,620,272  | 17,667,873  | 17361                   | in gene                   | 4.00     |
| NM_009397                     | Tnfrsf10b     | tumor necrosis factor, alpha-induced protein 3                                          | 10  | 18,720,722  | 18,735,173  | 117                     | in gene                   | 8.00     |
| NM_008580                     | Map3k5        | mitogen activated protein kinase kinase kinase 5                                        | 10  | 19,654,278  | 19,861,529  | 191578                  | in gene                   | 5.00     |
| NM_026203                     | Ahi1          | Abelson helper integration site                                                         | 10  | 20,672,470  | 20,800,235  | -22                     | upstream                  | 7.00     |
| XM_001473813                  | LOC100039936  | hypothetical protein LOC100039936                                                       | 10  | 21,463,673  | 21,466,812  | -3641                   | upstream                  | 4.00     |
| NM_011361                     | Sgk           | serum/glucocorticoid regulated kinase                                                   | 10  | 21,714,502  | 21,719,698  | -214                    | upstream                  | 6.00     |

| Accession No.                                                                                                             | Symbol        | Gene Title                                                                                                   | Chr | Gene Start | Gene End   | Interval Dists to Start | Interval Pos      | Avg Peak |
|---------------------------------------------------------------------------------------------------------------------------|---------------|--------------------------------------------------------------------------------------------------------------|-----|------------|------------|-------------------------|-------------------|----------|
| NM_178934                                                                                                                 | Slc2a12       | solute carrier family 2 (facilitated glucose transporter), member 12                                         | 10  | 22,364,937 | 22,424,091 | 46764                   | in gene           | 5.00     |
| NM_027347                                                                                                                 | Crsp3         | cofactor required for Sp1 transcriptional activation, subunit 3                                              | 10  | 24,589,853 | 24,633,266 | -189                    | upstream          | 5.00     |
| NM_008481                                                                                                                 | Lama2         | laminin, alpha 2                                                                                             | 10  | 26,701,091 | 27,336,748 | 594348                  | in gene           | 5.00     |
| NM_025614                                                                                                                 | Rwd1          | RWD domain containing 1                                                                                      | 10  | 33,716,361 | 33,739,422 | -2                      | upstream          | 6.00     |
| NM_008538                                                                                                                 | Marcks        | myristoylated alanine rich protein kinase C substrate                                                        | 10  | 36,853,049 | 36,858,732 | 1796                    | in gene           | 7.00     |
| XM_001475382                                                                                                              | LOC100040846  | hypothetical protein LOC100040846                                                                            | 10  | 36,860,890 | 36,871,119 | -3954                   | upstream          | 7.00     |
| NM_145743                                                                                                                 | Lace1         | lactation elevated 1                                                                                         | 10  | 42,032,391 | 42,198,371 | 51                      | in gene           | 7.00     |
| NM_172416                                                                                                                 | Ostm1         | osteopetrosis associated transmembrane protein 1                                                             | 10  | 42,398,723 | 42,422,261 | 31725                   | downstream        | 5.00     |
| NM_153055                                                                                                                 | Sec63         | SEC63-like (S. cerevisiae)                                                                                   | 10  | 42,481,532 | 42,549,093 | 132                     | in gene           | 5.00     |
| XM_001476352                                                                                                              | LOC100041418  | hypothetical protein LOC100041418                                                                            | 10  | 43,426,704 | 43,428,098 | 6333                    | downstream        | 4.00     |
| NM_053069                                                                                                                 | Atg5          | autophagy-related 5 (yeast)                                                                                  | 10  | 43,988,164 | 44,084,097 | 93444                   | in gene           | 4.00     |
| XM_001476478                                                                                                              | LOC100041506  | hypothetical protein LOC100041506                                                                            | 10  | 44,139,763 | 44,151,019 | -9253                   | upstream          | 4.00     |
| NM_007548                                                                                                                 | Prdm1         | PR domain containing 1, with ZNF domain                                                                      | 10  | 44,156,983 | 44,178,554 | 18282                   | in gene           | 4.00     |
| NM_011156                                                                                                                 | Prep          | prolyl endopeptidase                                                                                         | 10  | 44,787,020 | 44,878,801 | 15412                   | in gene           | 5.00     |
| NM_177306                                                                                                                 | Rfxdc1        | regulatory factor X domain containing 1                                                                      | 10  | 51,405,324 | 51,450,235 | 21108                   | in gene           | 6.00     |
| NM_001081428                                                                                                              | 4930589M24Rik | RIKEN cDNA 4930589M24 gene                                                                                   | 10  | 53,352,951 | 53,470,715 | 121499                  | downstream        | 8.00     |
| NM_026148                                                                                                                 | Lims1         | LIM and senescent cell antigen-like domains 1                                                                | 10  | 57,786,295 | 57,887,437 | 96233                   | in gene           | 6.00     |
| NM_010100                                                                                                                 | Edar          | ectodysplasin-A receptor                                                                                     | 10  | 58,063,537 | 58,138,444 | 3884                    | in gene           | 7.00     |
| NM_026937                                                                                                                 | Ascc1         | activating signal cointegrator 1 complex subunit 1                                                           | 10  | 59,465,587 | 59,562,734 | 75773, 96125            | in gene, in gene  | 5.50     |
| NM_052994                                                                                                                 | Spock2        | sparc/osteonectin, cwcv and kazal-like domains proteoglycan 2                                                | 10  | 59,569,005 | 59,596,662 | -7293                   | upstream          | 5.00     |
| NM_016803                                                                                                                 | Chst3         | carbohydrate (chondroitin 6/keratan) sulfotransferase 3                                                      | 10  | 59,644,282 | 59,651,455 | 383                     | in gene           | 5.00     |
| NM_011179                                                                                                                 | Psap          | prosaposin                                                                                                   | 10  | 59,740,486 | 59,765,348 | 1914                    | in gene           | 5.00     |
| NM_023596                                                                                                                 | Slc29a3       | solute carrier family 29 (nucleoside transporters), member 3                                                 | 10  | 60,174,820 | 60,215,530 | 21578                   | in gene           | 5.00     |
| NM_025273                                                                                                                 | Pcbd1         | pterin 4 alpha carbinolamine dehydratase/dimerization cofactor of hepatocyte nuclear factor 1 alpha (TCF1) 1 | 10  | 60,552,107 | 60,557,067 | -6347                   | upstream          | 6.00     |
| NM_001081127                                                                                                              | Adamts14      | a disintegrin-like and metallopeptidase (repolydin type) with thrombospondin type 1 motif, 14                | 10  | 60,659,860 | 60,736,186 | 22394                   | in gene           | 4.00     |
| NM_013753                                                                                                                 | X99384        | cDNA sequence X99384                                                                                         | 10  | 60,782,410 | 60,818,784 | 9248, 6944              | in gene, in gene  | 6.00     |
| NM_026438                                                                                                                 | Ppa1          | pyrophosphatase (inorganic) 1                                                                                | 10  | 61,111,369 | 61,136,913 | 11031                   | in gene           | 5.00     |
| NM_009314                                                                                                                 | Tacr2         | tachykinin receptor 2                                                                                        | 10  | 61,715,504 | 61,728,738 | 8747                    | in gene           | 4.00     |
| NM_010438                                                                                                                 | Hk1           | hexokinase 1                                                                                                 | 10  | 61,732,610 | 61,842,631 | 118380                  | downstream        | 4.00     |
| NM_181423                                                                                                                 | Supv31        | suppressor of var1, 3-like 1 (S. cerevisiae)                                                                 | 10  | 61,892,126 | 61,912,441 | 3257                    | in gene           | 5.00     |
| NM_133672                                                                                                                 | Vps26a        | vacuolar protein sorting 26 homolog A (yeast)                                                                | 10  | 61,918,020 | 61,949,500 | 40316                   | downstream        | 5.00     |
| NM_053183                                                                                                                 | Ddx50         | DEAD (Asp-Glu-Ala-Asp) box polypeptide 50                                                                    | 10  | 62,078,771 | 62,113,946 | -214                    | upstream          | 6.00     |
| XM_125685,<br>XM_905594                                                                                                   | Stox1         | storkhead box 1                                                                                              | 10  | 62,121,791 | 62,188,876 | 74716                   | downstream        | 6.00     |
| XM_483911,<br>XM_905765                                                                                                   | Mypn          | myopalladin                                                                                                  | 10  | 62,578,528 | 62,671,678 | 49118                   | in gene           | 5.00     |
| XM_907708,<br>XM_975833                                                                                                   | Jmjd1c        | jumonji domain containing 1C                                                                                 | 10  | 66,590,006 | 66,719,074 | -150                    | upstream          | 6.00     |
| NM_001081346                                                                                                              | Plekhk1       | pleckstrin homology domain containing, family K member 1                                                     | 10  | 67,442,346 | 67,506,612 | 18966                   | in gene           | 5.00     |
| NM_001081347                                                                                                              | Rhobtb1       | Rho-related BTB domain containing 1                                                                          | 10  | 68,675,405 | 68,754,539 | 65971                   | in gene           | 7.00     |
| NM_009670,<br>NM_146005,<br>NM_170687,<br>NM_170688,<br>NM_170689,<br>NM_170690,<br>NM_170728,<br>NM_170729,<br>NM_170730 | Ank3          | ankyrin 3, epithelial                                                                                        | 10  | 68,996,456 | 69,490,184 | 262536                  | in gene           | 5.00     |
| NM_025807                                                                                                                 | Slc16a9       | solute carrier family 16 (monocarboxylic acid transporters), member 9                                        | 10  | 69,708,024 | 69,748,699 | 14056                   | in gene           | 7.00     |
| NM_001081412                                                                                                              | Bcr           | breakpoint cluster region homolog                                                                            | 10  | 74,523,641 | 74,645,695 | 97831                   | in gene           | 6.00     |
| NM_172549                                                                                                                 | Cabin1        | calcineurin binding protein 1                                                                                | 10  | 75,108,855 | 75,227,102 | -9266                   | upstream          | 6.00     |
| NM_010027                                                                                                                 | Ddt           | D-dopachrome tautomerase                                                                                     | 10  | 75,233,978 | 75,236,119 | -249                    | upstream          | 6.00     |
| NM_133994                                                                                                                 | Gstt3         | glutathione S-transferase, theta 3                                                                           | 10  | 75,236,867 | 75,244,159 | 7791                    | downstream        | 6.00     |
| NM_008185                                                                                                                 | Gstt1         | glutathione S-transferase, theta 1                                                                           | 10  | 75,246,560 | 75,261,329 | 24961                   | downstream        | 6.00     |
| NM_011418                                                                                                                 | Smrbc1        | SWI/SNF related, matrix associated, actin dependent regulator of chromatin, subfamily b, member 1            | 10  | 75,359,520 | 75,384,333 | 8381                    | in gene           | 5.00     |
| NM_008606                                                                                                                 | Mmp11         | matrix metalloproteinase 11                                                                                  | 10  | 75,385,969 | 75,395,208 | 19256                   | downstream        | 5.00     |
| NM_001081419                                                                                                              | Dip2a         | DIP2 disco-interacting protein 2 homolog A (Drosophila)                                                      | 10  | 75,725,794 | 75,808,007 | 45399                   | in gene           | 5.00     |
| NM_146007                                                                                                                 | Col6a2        | procollagen, type VI, alpha 2                                                                                | 10  | 76,058,507 | 76,086,059 | -149                    | upstream          | 6.00     |
| NM_021568                                                                                                                 | Pcbp3         | poly(rC) binding protein 3                                                                                   | 10  | 76,224,602 | 76,424,533 | 48949, -139             | in gene, upstream | 6.00     |
| NM_009929                                                                                                                 | Col18a1       | procollagen, type XVIII, alpha 1                                                                             | 10  | 76,514,924 | 76,629,246 | 34302, 4478             | in gene, in gene  | 8.00     |
| NM_026431                                                                                                                 | 1810043G02Rik | RIKEN cDNA 1810043G02 gene                                                                                   | 10  | 77,441,395 | 77,448,183 | -131                    | upstream          | 8.00     |

| Accession No.                                       | Symbol        | Gene Title                                                      | Chr | Gene Start  | Gene End    | Interval Dists to Start | Interval Pos               | Avg Peak |
|-----------------------------------------------------|---------------|-----------------------------------------------------------------|-----|-------------|-------------|-------------------------|----------------------------|----------|
| NM_008826                                           | Pfkl          | phosphofructokinase, liver, B-type                              | 10  | 77,450,016  | 77,472,494  | 31230                   | downstream                 | 8.00     |
| NM_172134                                           | Pdck          | pyridoxal (pyridoxine, vitamin B6) kinase                       | 10  | 77,901,715  | 77,927,720  | 4200                    | in gene                    | 6.00     |
| NM_173751                                           | Ilvbl         | ilvB (bacterial acetolactate synthase)-like                     | 10  | 78,037,287  | 78,047,238  | -3447                   | upstream                   | 6.00     |
| NM_027422                                           | Mier2         | mesoderm induction early response 1, family member 2            | 10  | 79,002,990  | 79,017,836  | 6604                    | in gene                    | 5.00     |
| NM_013591                                           | Madcam1       | mucosal vascular addressin cell adhesion molecule 1             | 10  | 79,127,328  | 79,131,281  | 7840                    | downstream                 | 5.00     |
| NM_148934                                           | Gtrgeo22      | gene trap ROSA b-geo 22                                         | 10  | 79,132,155  | 79,138,871  | 3013, 12293             | in gene, downstream        | 5.50     |
| NM_177613                                           | Cdc34         | cell division cycle 34 homolog (S. cerevisiae)                  | 10  | 79,144,940  | 79,151,143  | -9772, -492             | upstream, upstream         | 5.50     |
| NM_008504                                           | Gzmm          | granzyme M (lymphocyte met-ase 1)                               | 10  | 79,151,765  | 79,158,005  | -7317                   | upstream                   | 6.00     |
| NM_023304                                           | Fgf22         | fibroblast growth factor 22                                     | 10  | 79,217,864  | 79,219,706  | 11256                   | downstream                 | 7.00     |
| NM_144528                                           | Rnf126        | ring finger protein 126                                         | 10  | 79,221,284  | 79,229,669  | 549                     | in gene                    | 7.00     |
| NM_011492                                           | Stk11         | serine/threonine kinase 11                                      | 10  | 79,578,947  | 79,593,424  | 15325                   | downstream                 | 5.00     |
| NM_007705                                           | Cirbp         | cold inducible RNA binding protein                              | 10  | 79,630,586  | 79,634,398  | -2714                   | upstream                   | 9.00     |
| NM_027207                                           | 1600002K03Rik | RIKEN cDNA 1600002K03 gene                                      | 10  | 79,635,689  | 79,637,864  | -7817                   | upstream                   | 9.00     |
| NM_007909                                           | Efna2         | ephrin A2                                                       | 10  | 79,642,227  | 79,652,390  | 8461                    | in gene                    | 6.00     |
| NM_025650                                           | Uqcr          | ubiquinol-cytochrome c reductase (6.4kD) subunit                | 10  | 79,865,742  | 79,869,566  | 6910                    | downstream                 | 9.00     |
| NM_011548                                           | Tcfe2a        | transcription factor E2a                                        | 10  | 79,872,339  | 79,896,352  | 33696, 1136             | downstream, in gene        | 7.50     |
| NM_026094                                           | Atp8b3        | ATPase, Class I, type 8B, member 3                              | 10  | 79,982,330  | 80,001,869  | 4509                    | in gene                    | 5.00     |
| NM_025852                                           | Rexo1         | REX1, RNA exonuclease 1 homolog (S. cerevisiae)                 | 10  | 80,003,671  | 80,024,305  | 26945                   | downstream                 | 5.00     |
| NM_019575                                           | Scamp4        | secretory carrier membrane protein 4                            | 10  | 80,065,627  | 80,078,528  | 4517                    | in gene                    | 5.00     |
| NM_007460                                           | Ap3d1         | adaptor-related protein complex 3, delta 1 subunit              | 10  | 80,169,723  | 80,204,956  | -628                    | upstream                   | 5.00     |
| NM_008753                                           | Oaz1          | ornithine decarboxylase antizyme                                | 10  | 80,289,401  | 80,292,035  | 9671                    | downstream                 | 6.00     |
| NM_001013758                                        | BC072620      | cDNA sequence BC072620                                          | 10  | 80,295,546  | 80,306,775  | 7703, -6105             | in gene, upstream          | 5.50     |
| NM_025349                                           | Lsm7          | LSM7 homolog, U6 small nuclear RNA associated (S. cerevisiae)   | 10  | 80,315,570  | 80,317,954  | 5074                    | downstream                 | 5.00     |
| NM_175195                                           | 3110056O03Rik | RIKEN cDNA 3110056O03 gene                                      | 10  | 80,318,020  | 80,331,453  | -5140                   | upstream                   | 5.00     |
| NM_021501                                           | Pias4         | protein inhibitor of activated STAT 4                           | 10  | 80,616,033  | 80,630,559  | 14383                   | in gene                    | 4.00     |
| NM_010768                                           | Matk          | megakaryocyte-associated tyrosine kinase                        | 10  | 80,720,290  | 80,725,726  | 10782                   | downstream                 | 9.00     |
| NM_025317                                           | Mrp154        | mitochondrial ribosomal protein L54                             | 10  | 80,727,467  | 80,729,671  | -1401                   | upstream                   | 9.00     |
| NM_018758                                           | Apba3         | amyloid beta (A4) precursor protein-binding, family A, member 3 | 10  | 80,730,985  | 80,735,973  | 87                      | in gene                    | 9.00     |
| NM_027381                                           | 2510012J08Rik | RIKEN cDNA 2510012J08 gene                                      | 10  | 80,783,942  | 80,788,987  | 8954                    | downstream                 | 5.00     |
| NM_009325                                           | Tbxa2r        | thromboxane A2 receptor                                         | 10  | 80,791,476  | 80,797,917  | 1420                    | in gene                    | 5.00     |
| NM_148951                                           | Gipc3         | GIPC PDZ domain containing family, member 3                     | 10  | 80,800,507  | 80,806,011  | 13115, -8725            | downstream, upstream       | 5.50     |
| NM_010440                                           | Hmg20b        | high mobility group 20 B                                        | 10  | 80,808,797  | 80,813,155  | -1581                   | upstream                   | 6.00     |
| NM_028657                                           | F630110N24Rik | RIKEN cDNA F630110N24 gene                                      | 10  | 80,820,236  | 80,828,967  | -5500, 7332             | upstream, in gene          | 5.50     |
| NM_001014836                                        | 4930404N11Rik | RIKEN cDNA 4930404N11 gene                                      | 10  | 80,826,794  | 80,828,535  | 967                     | in gene                    | 5.00     |
| NM_019757                                           | Fzr1          | fizzy/cell division cycle 20 related 1 (Drosophila)             | 10  | 80,829,624  | 80,841,115  | 13547, -21              | downstream, upstream       | 6.00     |
| NM_133964                                           | Dohh          | deoxyhypusine hydroxylase/monooxygenase                         | 10  | 80,847,256  | 80,851,097  | -6120                   | upstream                   | 7.00     |
| NM_008688, NM_026756                                | Nfic          | nuclear factor I/C                                              | 10  | 80,858,936  | 80,889,918  | 18174, 13182, -6914     | in gene, in gene, upstream | 7.67     |
| XM_618789, XM_985040                                | Bruno5        | bruno-like 5, RNA binding protein (Drosophila)                  | 10  | 80,924,959  | 80,945,429  | 5509                    | in gene                    | 7.00     |
| NM_134009                                           | Ncln          | nicalin homolog (zebrafish)                                     | 10  | 80,948,994  | 80,959,101  | 19181                   | downstream                 | 7.00     |
| NM_001042513, NM_001042514, NM_001042523, NM_015762 | Txnr1         | thioredoxin reductase 1                                         | 10  | 82,296,696  | 82,360,469  | 63864, 69789            | downstream, downstream     | 5.00     |
| NM_001024918, NM_027689                             | Rfx4          | regulatory factor X, 4 (influences HLA class II expression)     | 10  | 84,218,793  | 84,369,283  | 81591                   | in gene                    | 7.00     |
| NM_001017525, NM_028709                             | Btbd11        | BTB (POZ) domain containing 11                                  | 10  | 84,850,564  | 85,123,037  | 61756, 113836, 147036   | in gene, in gene, in gene  | 5.33     |
| NM_181650                                           | Prdm4         | PR domain containing 4                                          | 10  | 85,354,711  | 85,379,690  | 3834                    | in gene                    | 5.00     |
| NM_175418                                           | 8030451F13Rik | RIKEN cDNA 8030451F13 gene                                      | 10  | 87,981,027  | 88,067,759  | 6959                    | in gene                    | 7.00     |
| NM_053072                                           | Fgd6          | FYVE, RhoGEF and PH domain containing 6                         | 10  | 93,498,746  | 93,604,749  | 33094, 112294           | in gene, downstream        | 6.00     |
| NM_011629                                           | Nr2c1         | nuclear receptor subfamily 2, group C, member 1                 | 10  | 93,619,031  | 93,658,096  | -7991, 42585            | upstream, downstream       | 6.50     |
| NM_025551                                           | Ndufa12       | NADH dehydrogenase (ubiquinone) 1 alpha subcomplex, 12          | 10  | 93,661,754  | 93,683,693  | -138                    | upstream                   | 5.00     |
| NM_172051                                           | Tmcc3         | transmembrane and coiled coil domains 3                         | 10  | 93,977,624  | 94,053,699  | 312                     | in gene                    | 5.00     |
| NM_009950                                           | Cradd         | CASP2 and RIPK1 domain containing adaptor with death domain     | 10  | 94,637,380  | 94,786,731  | 96075                   | in gene                    | 5.00     |
| NM_027740                                           | Wdr51b        | WD repeat domain 51B                                            | 10  | 98,569,805  | 98,660,622  | 65171                   | in gene                    | 7.00     |
| NM_026268                                           | Dusp6         | dual specificity phosphatase 6                                  | 10  | 98,725,865  | 98,730,118  | -1337                   | upstream                   | 6.00     |
| NM_001033332                                        | Tmtc3         | transmembrane and tetratricopeptide repeat containing 3         | 10  | 99,910,818  | 99,949,981  | 285                     | in gene                    | 5.00     |
| NM_207522                                           | BC067068      | cDNA sequence BC067068                                          | 10  | 105,200,303 | 105,278,410 | 10                      | in gene                    | 7.00     |
| NM_025602                                           | Ccdc59        | coiled-coil domain containing 59                                | 10  | 105,278,535 | 105,284,566 | -135                    | upstream                   | 7.00     |
| NM_027892                                           | Ppp1r12a      | protein phosphatase 1, regulatory (inhibitor) subunit 12A       | 10  | 107,599,456 | 107,714,631 | -768                    | upstream                   | 6.00     |
| NM_007792                                           | Csrp2         | cysteine and glycine-rich protein 2                             | 10  | 110,357,235 | 110,376,678 | -115                    | upstream                   | 8.00     |
| NM_001033261                                        | Ccdc131       | coiled-coil domain containing 131                               | 10  | 114,822,015 | 114,869,827 | 43553                   | in gene                    | 7.00     |
| NM_029928                                           | Ptprb         | protein tyrosine phosphatase, receptor type, B                  | 10  | 115,738,562 | 115,820,989 | 83422                   | downstream                 | 6.00     |



| Accession No.              | Symbol        | Gene Title                                                                                                                                          | Chr | Gene Start  | Gene End    | Interval Dists to Start  | Interval Pos                         | Avg Peak |
|----------------------------|---------------|-----------------------------------------------------------------------------------------------------------------------------------------------------|-----|-------------|-------------|--------------------------|--------------------------------------|----------|
| XM_001000571,<br>XM_137270 | Kifc5c        | kinesin family member C5C                                                                                                                           | 10  | 117,027,299 | 117,032,998 | 685                      | in gene                              | 9.00     |
| NM_029875                  | Slc35e3       | solute carrier family 35, member E3                                                                                                                 | 10  | 117,170,734 | 117,183,414 | 14438                    | downstream                           | 6.00     |
| NM_024457                  | Rap1b         | RAS related protein 1b                                                                                                                              | 10  | 117,251,653 | 117,283,030 | -170                     | upstream                             | 7.00     |
| XM_125901,<br>XM_904108    | Cand1         | cullin associated and neddylation disassociated 1                                                                                                   | 10  | 118,635,868 | 118,735,810 | 59426                    | in gene                              | 7.00     |
| NM_011915                  | Wif1          | Wnt inhibitory factor 1                                                                                                                             | 10  | 120,471,286 | 120,537,698 | -326                     | upstream                             | 4.00     |
| XM_001481269,<br>XM_137322 | 4930505D03Rik | RIKEN cDNA 4930505D03 gene                                                                                                                          | 10  | 120,700,475 | 120,789,326 | 36590                    | in gene                              | 6.00     |
| NM_173022                  | BC048403      | cDNA sequence BC048403                                                                                                                              | 10  | 121,176,993 | 121,189,915 | 18751                    | downstream                           | 6.00     |
| NM_001033262               | March9        | membrane-associated ring finger (C3HC4) 9                                                                                                           | 10  | 126,493,106 | 126,497,240 | -3144                    | upstream                             | 7.00     |
| NM_009870                  | Cdk4          | cyclin-dependent kinase 4                                                                                                                           | 10  | 126,500,671 | 126,504,451 | -287                     | upstream                             | 7.00     |
| NM_025982                  | Tspan31       | tetraspanin 31                                                                                                                                      | 10  | 126,504,346 | 126,507,317 | 6933                     | downstream                           | 7.00     |
| NM_028027                  | D10Ert610e    | DNA segment, Chr 10, ERATO Doi 610, expressed                                                                                                       | 10  | 126,619,585 | 126,627,075 | -2701                    | upstream                             | 5.00     |
| NM_030714                  | Dtx3          | deltex 3 homolog (Drosophila)                                                                                                                       | 10  | 126,627,434 | 126,632,765 | 2989                     | in gene                              | 5.00     |
| NM_054097                  | Pip5k2c       | phosphatidylinositol-4-phosphate 5-kinase, type II, gamma                                                                                           | 10  | 126,634,123 | 126,648,602 | 18826                    | downstream                           | 5.00     |
| NM_027151                  | Dctn2         | dynactin 2                                                                                                                                          | 10  | 126,703,455 | 126,718,863 | 24225                    | downstream                           | 7.00     |
| NM_033072                  | Mbd6          | methyl-CpG binding domain protein 6                                                                                                                 | 10  | 126,719,012 | 126,725,827 | -1853                    | upstream                             | 7.00     |
| XM_001479400               | LOC100043045  | hypothetical protein LOC100043045                                                                                                                   | 10  | 126,726,751 | 126,727,983 | 303                      | in gene                              | 7.00     |
| NM_007837                  | Ddit3         | DNA-damage inducible transcript 3                                                                                                                   | 10  | 126,727,866 | 126,733,342 | -186                     | upstream                             | 7.00     |
| NM_001003913               | Mars          | methionine-tRNA synthetase                                                                                                                          | 10  | 126,733,282 | 126,748,695 | 21015                    | downstream                           | 7.00     |
| NM_010296                  | Gl1           | GLI-Kruppel family member GL11                                                                                                                      | 10  | 126,766,938 | 126,778,635 | -9749                    | upstream                             | 5.00     |
| NM_008382                  | Inhbe         | inhibin beta E                                                                                                                                      | 10  | 126,786,458 | 126,788,828 | 444, -2900               | in gene, upstream                    | 5.00     |
| NM_010565                  | Inhbc         | inhibin beta-C                                                                                                                                      | 10  | 126,793,378 | 126,807,486 | 19102, 15758             | downstream, downstream               | 5.00     |
| NM_008512                  | Lrp1          | low density lipoprotein receptor-related protein 1                                                                                                  | 10  | 126,975,213 | 127,058,204 | 69948, 62236             | in gene, in gene                     | 7.50     |
| NM_007412                  | Admr          | adrenomedullin receptor                                                                                                                             | 10  | 127,186,658 | 127,188,854 | -7322                    | upstream                             | 5.00     |
| NM_080436                  | Rdh1          | retinol dehydrogenase 1 (all trans)                                                                                                                 | 10  | 127,196,866 | 127,205,352 | -690                     | upstream                             | 5.00     |
| NM_013608                  | Naca          | nascent polypeptide-associated complex alpha polypeptide                                                                                            | 10  | 127,472,629 | 127,485,689 | 23387                    | downstream                           | 6.00     |
| NM_019766                  | Ptges3        | prostaglandin E synthase 3 (cytosolic)                                                                                                              | 10  | 127,496,038 | 127,514,310 | -22, 762, 27194          | upstream, in gene, downstream        | 8.67     |
| NM_016774                  | Atp5b         | ATP synthase, H+ transporting mitochondrial F1 complex, beta subunit                                                                                | 10  | 127,520,363 | 127,527,444 | 2869, 8965, 13909        | in gene, downstream, downstream      | 6.00     |
|                            | Mirn677       | microRNA 677                                                                                                                                        | 10  | 127,522,341 | 127,522,449 | 891, 6987                | downstream, downstream               | 6.00     |
| NM_054078                  | Baz2a         | bromodomain adjacent to zinc finger domain, 2A                                                                                                      | 10  | 127,529,839 | 127,566,359 | -6607, -511, 4433, 32465 | upstream, upstream, in gene, in gene | 6.25     |
| XM_001479461               | LOC100043085  | similar to proline-rich protein BstNI subfamily 2                                                                                                   | 10  | 127,529,903 | 127,534,876 | 11644, 5548, 604         | downstream, downstream, in gene      | 6.00     |
| NM_001039080,<br>NM_019711 | Rbms2         | RNA binding motif, single stranded interacting protein 2                                                                                            | 10  | 127,566,526 | 127,617,353 | 55049, 32713             | downstream, in gene                  | 6.50     |
| NM_133992                  | Usp52         | ubiquitin specific peptidase 52                                                                                                                     | 10  | 127,740,391 | 127,758,403 | 19465                    | downstream                           | 4.00     |
| NM_019953                  | Tmem4         | transmembrane protein 4                                                                                                                             | 10  | 127,759,515 | 127,764,243 | 341                      | in gene                              | 4.00     |
| NM_026444                  | Cs            | citrate synthase                                                                                                                                    | 10  | 127,774,888 | 127,799,535 | 30696                    | downstream                           | 9.00     |
| NM_198160                  | Smarcc2       | SWI/SNF related, matrix associated, actin dependent regulator of chromatin, subfamily c, member 2                                                   | 10  | 127,896,350 | 127,927,228 | 39506                    | downstream                           | 6.00     |
| NM_010860                  | Myl6          | myosin, light polypeptide 6, alkali, smooth muscle and non-muscle                                                                                   | 10  | 127,927,917 | 127,930,881 | -4975                    | upstream                             | 6.00     |
| NM_172259                  | Myl6b         | myosin, light polypeptide 6B                                                                                                                        | 10  | 127,931,213 | 127,935,741 | -115                     | upstream                             | 6.00     |
| NM_134003                  | Zc3h10        | zinc finger CCCH type containing 10                                                                                                                 | 10  | 127,980,619 | 127,984,800 | -928                     | upstream                             | 6.00     |
| NM_018860                  | Rpl41         | ribosomal protein L41                                                                                                                               | 10  | 127,985,173 | 127,986,172 | 444                      | in gene                              | 6.00     |
| NM_011119                  | Pa2g4         | proliferation-associated 2G4                                                                                                                        | 10  | 127,994,822 | 128,002,990 | 17262, -386              | downstream, upstream                 | 6.50     |
| NM_010153                  | ErbB3         | v-erb-b2 erythroblastic leukemia viral oncogene homolog 3 (avian)                                                                                   | 10  | 128,006,424 | 128,026,557 | 23181                    | downstream                           | 7.00     |
| NM_016811                  | Dgka          | diacylglycerol kinase, alpha                                                                                                                        | 10  | 128,157,190 | 128,181,112 | -4632                    | upstream                             | 6.00     |
| XM_001480976               | LOC100043669  | hypothetical protein LOC100043669                                                                                                                   | 10  | 128,180,402 | 128,181,937 | -3807                    | upstream                             | 6.00     |
| NM_030100                  | Wibg          | within bgn homolog (Drosophila)                                                                                                                     | 10  | 128,185,018 | 128,203,146 | 726                      | in gene                              | 6.00     |
| NM_030207                  | Sfi1          | Sfi1 homolog, spindle assembly associated (yeast)                                                                                                   | 11  | 3,031,853   | 3,093,466   | 69626                    | downstream                           | 13.00    |
| NM_029458                  | Hormad2       | HORMA domain containing 2                                                                                                                           | 11  | 4,246,386   | 4,341,085   | 4605                     | in gene                              | 5.00     |
| NM_023816                  | Ankrd36       | ankyrin repeat domain 36                                                                                                                            | 11  | 5,469,687   | 5,589,340   | 72121                    | in gene                              | 5.00     |
| XM_979372                  | LOC665181     | similar to Endothelial differentiation-related factor 1 (EDF-1) (Multiprotein bridging factor 1) (MBF1) (Calmodulin-associated peptide 19) (CAP-19) | 11  | 5,534,063   | 5,534,774   | 7745                     | downstream                           | 5.00     |
| NM_009636                  | Aebp1         | AE binding protein 1                                                                                                                                | 11  | 5,761,950   | 5,772,053   | 1010                     | in gene                              | 6.00     |
| NM_008894                  | Pold2         | polymerase (DNA directed), delta 2, regulatory subunit                                                                                              | 11  | 5,772,191   | 5,778,220   | 15260                    | downstream                           | 6.00     |
| NM_010292                  | Gck           | glucokinase                                                                                                                                         | 11  | 5,800,826   | 5,849,602   | 29618                    | in gene                              | 7.00     |
| NM_007595                  | Camk2b        | calcium/calmodulin-dependent protein kinase II, beta                                                                                                | 11  | 5,869,675   | 5,965,751   | 45863                    | in gene                              | 4.00     |
| NM_008907                  | Ppia          | peptidylprolyl isomerase A                                                                                                                          | 11  | 6,315,873   | 6,319,813   | 671                      | in gene                              | 8.00     |
| XM_001476068,<br>XM_907680 | H2afv         | H2A histone family, member V                                                                                                                        | 11  | 6,327,229   | 6,344,442   | 1226                     | in gene                              | 7.00     |

| Accession No.                         | Symbol        | Gene Title                                                                                      | Chr | Gene Start | Gene End   | Interval Dists to Start | Interval Pos               | Avg Peak |
|---------------------------------------|---------------|-------------------------------------------------------------------------------------------------|-----|------------|------------|-------------------------|----------------------------|----------|
| XM_975835                             | LOC665283     | similar to SMT3 suppressor of mif two 3 homolog 2                                               | 11  | 6,353,134  | 6,354,045  | -9918                   | upstream                   | 7.00     |
| NM_019511                             | Ramp3         | receptor (calcitonin) activity modifying protein 3                                              | 11  | 6,558,536  | 6,577,478  | 2232                    | in gene                    | 5.00     |
| NM_001083587                          | Tns3          | tensin 3                                                                                        | 11  | 8,331,655  | 8,564,538  | 122410, 39578           | in gene, in gene           | 5.50     |
| NM_010789                             | Meis1         | myeloid ecotropic viral integration site 1                                                      | 11  | 18,780,431 | 18,918,683 | 48259, -1877            | in gene, upstream          | 8.00     |
| XM_001477234                          | LOC100041937  | hypothetical protein LOC100041937                                                               | 11  | 19,819,254 | 19,820,410 | 1162, 5898              | downstream, downstream     | 6.00     |
| NM_033523                             | Spred2        | sprouty-related, EVH1 domain containing 2                                                       | 11  | 19,824,445 | 19,922,600 | -4029, 707              | upstream, in gene          | 6.00     |
| NM_001038625, NM_021372               | Sertad2       | SERTA domain containing 2                                                                       | 11  | 20,443,256 | 20,553,026 | 89064                   | in gene                    | 5.00     |
| NM_139297                             | Ugp2          | UDP-glucose pyrophosphorylase 2                                                                 | 11  | 21,221,147 | 21,270,478 | -786                    | upstream                   | 6.00     |
| NM_144514                             | Comm1         | COMM domain containing 1                                                                        | 11  | 22,799,728 | 22,882,284 | -8393                   | upstream                   | 6.00     |
| NM_009837                             | Cct4          | chaperonin subunit 4 (delta)                                                                    | 11  | 22,890,593 | 22,903,336 | 84                      | in gene                    | 6.00     |
| NM_176841                             | A430106J12Rik | RIKEN cDNA A430106J12 gene                                                                      | 11  | 29,273,775 | 29,410,812 | 86321, 141249           | in gene, downstream        | 5.50     |
| NM_026465                             | 2010316F05Rik | RIKEN cDNA 2010316F05 gene                                                                      | 11  | 29,413,055 | 29,415,033 | 9                       | in gene                    | 5.00     |
| XM_001479750                          | LOC100042990  | hypothetical protein LOC100042990                                                               | 11  | 29,415,086 | 29,417,355 | -62, 11378              | upstream, downstream       | 6.00     |
| NM_133767                             | Mtif2         | mitochondrial translational initiation factor 2                                                 | 11  | 29,426,457 | 29,445,255 | 7                       | in gene                    | 7.00     |
| NM_026262                             | 4930524B15Rik | RIKEN cDNA 4930524B15 gene                                                                      | 11  | 31,865,633 | 31,879,651 | 191                     | in gene                    | 5.00     |
| NM_177364                             | Sh3pxd2b      | SH3 and PX domains 2B                                                                           | 11  | 32,247,811 | 32,328,183 | 77317, 78205            | in gene, in gene           | 5.00     |
| NM_173784                             | Ubt2d         | ubiquitin domain containing 2                                                                   | 11  | 32,355,372 | 32,418,709 | 15                      | in gene                    | 5.00     |
| NM_134015                             | Fbxw11        | F-box and WD-40 domain protein 11                                                               | 11  | 32,542,875 | 32,646,816 | -155                    | upstream                   | 5.00     |
| NM_008005                             | Fgf18         | fibroblast growth factor 18                                                                     | 11  | 33,017,430 | 33,047,400 | 24312                   | in gene                    | 5.00     |
| XM_001474176                          | LOC100039945  | similar to putative oral cancer suppressor                                                      | 11  | 48,638,620 | 48,640,157 | -4451                   | upstream                   | 8.00     |
| NM_053166                             | Trim7         | tripartite motif protein 7                                                                      | 11  | 48,643,941 | 48,654,919 | 667                     | in gene                    | 8.00     |
| NM_021510                             | Hnrph1        | heterogeneous nuclear ribonucleoprotein H1                                                      | 11  | 50,191,221 | 50,200,030 | -298                    | upstream                   | 6.00     |
| NM_153393                             | Col23a1       | procollagen, type XXIII, alpha 1                                                                | 11  | 51,103,422 | 51,394,612 | 132930, 139746          | in gene, in gene           | 6.50     |
| NM_028398                             | Agxt2l2       | alanine-glyoxylate aminotransferase 2-like 2                                                    | 11  | 51,398,305 | 51,416,539 | 21279                   | downstream                 | 7.00     |
| NM_010448                             | Hnrpab        | heterogeneous nuclear ribonucleoprotein A/B                                                     | 11  | 51,413,602 | 51,420,383 | 799                     | in gene                    | 7.00     |
| NM_029976                             | D11Erd497e    | DNA segment, Chr 11, ERATO Doi 497, expressed                                                   | 11  | 51,781,165 | 51,790,838 | -4493                   | upstream                   | 6.00     |
| NM_008300                             | Hspa4         | heat shock protein 4                                                                            | 11  | 53,073,316 | 53,113,981 | 48685                   | downstream                 | 5.00     |
| NM_011031                             | P4ha2         | procollagen-proline, 2-oxoglutarate 4-dioxygenase (proline 4-hydroxylase), alpha II polypeptide | 11  | 53,915,018 | 53,945,150 | 38614                   | downstream                 | 10.00    |
| NM_178626                             | Cdc42se2      | CDC42 small effector 2                                                                          | 11  | 54,531,004 | 54,601,138 | 50                      | in gene                    | 8.00     |
| NM_001029988                          | Fat2          | FAT tumor suppressor homolog 2 (Drosophila)                                                     | 11  | 55,064,112 | 55,125,759 | 55535                   | in gene                    | 5.00     |
| NM_020492                             | Glr1          | glycine receptor, alpha 1 subunit                                                               | 11  | 55,328,315 | 55,421,292 | 72668                   | in gene                    | 6.00     |
| NM_134189                             | Galnt10       | UDP-N-acetyl-alpha-D-galactosamine:polypeptide N-acetylgalactosaminyltransferase 10             | 11  | 57,458,944 | 57,601,003 | -96, 123264, 141440     | upstream, in gene, in gene | 6.00     |
| NM_001045521                          | Gm249         | gene model 249, (NCBI)                                                                          | 11  | 59,186,171 | 59,189,155 | -9021                   | upstream                   | 8.00     |
| NM_144521                             | 1110031B06Rik | RIKEN cDNA 1110031B06 gene                                                                      | 11  | 59,220,652 | 59,263,458 | 26530                   | in gene                    | 4.00     |
| NM_178417                             | BC050078      | cDNA sequence BC050078                                                                          | 11  | 59,274,699 | 59,285,976 | -5176                   | upstream                   | 5.00     |
| NM_012027, NM_201245                  | AA536749      | expressed sequence AA536749                                                                     | 11  | 59,476,034 | 59,589,724 | 61502, 81454            | in gene, in gene           | 6.00     |
| NM_001039092, NM_001039093, NM_153080 | Tom1l2        | target of myb1-like 2 (chicken)                                                                 | 11  | 60,040,216 | 60,166,407 | 73223, 56615            | in gene, in gene           | 5.50     |
| NM_145427                             | Atpaf2        | ATP synthase mitochondrial F1 complex assembly factor 2                                         | 11  | 60,214,126 | 60,230,507 | -1045                   | upstream                   | 4.00     |
| NM_025757                             | 4933439F18Rik | RIKEN cDNA 4933439F18 gene                                                                      | 11  | 60,230,805 | 60,258,779 | 747                     | in gene                    | 4.00     |
| NM_010862, NM_182698                  | Myo15         | myosin XV                                                                                       | 11  | 60,282,841 | 60,341,871 | 52423                   | in gene                    | 4.00     |
| NM_025294                             | Gtf3b         | gene trap locus F3b                                                                             | 11  | 60,715,748 | 60,727,292 | -1700                   | upstream                   | 5.00     |
| NM_010603                             | Kcnj12        | potassium inwardly-rectifying channel, subfamily J, member 12                                   | 11  | 60,879,306 | 60,884,631 | 3942, 5366              | in gene, downstream        | 6.50     |
| NM_013881                             | Ulk2          | Unc-51 like kinase 2 (C. elegans)                                                               | 11  | 61,589,162 | 61,668,119 | 4967                    | in gene                    | 5.00     |
| XM_001479316                          | LOC100042766  | hypothetical protein LOC100042766                                                               | 11  | 62,563,799 | 62,564,849 | 7433                    | downstream                 | 6.00     |
| NM_145136, NM_146386                  | Myocd         | myocardin                                                                                       | 11  | 64,990,063 | 65,083,482 | -38                     | upstream                   | 5.00     |
| XM_110968, XM_917040                  | Dnahc9        | dynein, axonemal, heavy chain 9                                                                 | 11  | 65,644,826 | 65,982,053 | 322725, 308805          | in gene, in gene           | 5.50     |
| NM_008744                             | Ntn1          | netrin 1                                                                                        | 11  | 68,022,866 | 68,200,328 | 84648, 1608             | in gene, in gene           | 7.00     |
| NM_023668                             | Ndel1         | nuclear distribution gene E-like homolog 1 (A. nidulans)                                        | 11  | 68,634,936 | 68,666,564 | 14196                   | in gene                    | 7.00     |
| NM_177060                             | 9930039A11Rik | RIKEN cDNA 9930039A11 gene                                                                      | 11  | 68,702,055 | 68,708,517 | 12985                   | downstream                 | 5.00     |
| NM_009080                             | Rpl26         | ribosomal protein L26                                                                           | 11  | 68,715,068 | 68,718,036 | -28                     | upstream                   | 5.00     |
| NM_011786                             | Aloxe3        | arachidonate lipoxygenase 3                                                                     | 11  | 68,939,879 | 68,962,616 | 30649                   | downstream                 | 5.00     |
| NM_009659                             | Alox12b       | arachidonate 12-lipoxygenase, 12R type                                                          | 11  | 68,970,574 | 68,983,293 | -46, 5074               | upstream, in gene          | 5.50     |
| NM_001045525                          | Cyb5d1        | cytochrome b5 domain containing 1                                                               | 11  | 69,207,114 | 69,208,848 | -1304                   | upstream                   | 4.00     |
| NM_030083                             | Lsm1          | LSM domain containing 1                                                                         | 11  | 69,209,293 | 69,210,173 | 859                     | in gene                    | 4.00     |
| NM_025915                             | Tmem88        | transmembrane protein 88                                                                        | 11  | 69,210,021 | 69,211,736 | 1584                    | in gene                    | 4.00     |
| NM_007911                             | Efnb3         | ephrin B3                                                                                       | 11  | 69,367,627 | 69,373,680 | 12376, -5216            | downstream, upstream       | 6.00     |
| NM_144824                             | Wdr79         | WD repeat domain 79                                                                             | 11  | 69,375,256 | 69,392,826 | 13930                   | in gene                    | 7.00     |
| XM_001479913                          | LOC100043030  | similar to ribosomal protein S27 (metallopanstimulin 1)                                         | 11  | 69,387,322 | 69,387,686 | -8426                   | upstream                   | 7.00     |
| NM_029348                             | Zbtb4         | zinc finger and BTB domain containing 4                                                         | 11  | 69,588,908 | 69,593,175 | 1540                    | in gene                    | 6.00     |

| Accession No.                         | Symbol        | Gene Title                                                                      | Chr | Gene Start | Gene End   | Interval Dists to Start  | Interval Pos                         | Avg Peak |
|---------------------------------------|---------------|---------------------------------------------------------------------------------|-----|------------|------------|--------------------------|--------------------------------------|----------|
| NM_009601                             | Chrn1         | cholinergic receptor, nicotinic, beta polypeptide 1 (muscle)                    | 11  | 69,597,539 | 69,609,445 | 18997                    | downstream                           | 6.00     |
| XM_484042, XM_978002                  | LOC432576     | hypothetical LOC432576                                                          | 11  | 69,690,186 | 69,691,607 | -2777                    | upstream                             | 7.00     |
| NM_153143                             | Kctd11        | potassium channel tetramerisation domain containing 11                          | 11  | 69,691,179 | 69,694,908 | 524                      | in gene                              | 7.00     |
| NM_153788                             | Centb1        | centaurin, beta 1                                                               | 11  | 69,695,069 | 69,709,041 | 14657                    | downstream                           | 7.00     |
| NM_001013414                          | 0610025P10Rik | RIKEN cDNA 0610025P10 gene                                                      | 11  | 69,715,393 | 69,727,322 | 18943                    | downstream                           | 6.00     |
| NM_019726                             | Gps2          | G protein pathway suppressor 2                                                  | 11  | 69,727,694 | 69,730,093 | 6642                     | downstream                           | 6.00     |
| NM_181582                             | Eif5a         | eukaryotic translation initiation factor 5A                                     | 11  | 69,730,224 | 69,734,843 | 507                      | in gene                              | 6.00     |
| NM_009204                             | Slc2a4        | solute carrier family 2 (facilitated glucose transporter), member 4             | 11  | 69,755,788 | 69,761,692 | -5188                    | upstream                             | 6.00     |
| NM_007864                             | Dlg4          | discs, large homolog 4 (Drosophila)                                             | 11  | 69,832,366 | 69,858,270 | 7591                     | in gene                              | 5.00     |
| NM_007440                             | Alox12        | arachidonate 12-lipoxygenase                                                    | 11  | 70,054,957 | 70,068,843 | 747                      | in gene                              | 5.00     |
| NM_145429                             | Arb2          | arrestin, beta 2                                                                | 11  | 70,246,155 | 70,254,176 | 6981                     | in gene                              | 6.00     |
| NM_025397                             | Med11         | mediator of RNA polymerase II transcription, subunit 11 homolog (S. cerevisiae) | 11  | 70,265,433 | 70,267,229 | 8231                     | downstream                           | 7.00     |
| NM_023158                             | Cxcl16        | chemokine (C-X-C motif) ligand 16                                               | 11  | 70,267,736 | 70,273,486 | -178                     | upstream                             | 7.00     |
| NM_001029929                          | Zmynd15       | zinc finger, MYND-type containing 15                                            | 11  | 70,273,124 | 70,279,701 | 540                      | in gene                              | 7.00     |
| NM_178367                             | Dhx33         | DEAH (Asp-Glu-Ala-His) box polypeptide 33                                       | 11  | 70,797,593 | 70,817,934 | 382                      | in gene                              | 6.00     |
| NM_033562                             | Der12         | Der1-like domain family, member 2                                               | 11  | 70,820,947 | 70,832,765 | 15213                    | downstream                           | 6.00     |
| NM_144526                             | 6720460F02Rik | RIKEN cDNA 6720460F02 gene                                                      | 11  | 71,856,004 | 71,860,872 | 10364                    | downstream                           | 5.00     |
| NM_001024927, NM_001081641            | Pitpnm3       | PITPNM family member 3                                                          | 11  | 71,861,030 | 71,949,391 | 83023                    | in gene                              | 5.00     |
| NM_001004148                          | Slc13a5       | solute carrier family 13 (sodium-dependent citrate transporter), member 5       | 11  | 72,055,585 | 72,080,106 | 12922                    | in gene                              | 4.00     |
| NM_001037713                          | Fbxo39        | F-box protein 39                                                                | 11  | 72,115,167 | 72,122,270 | 7569                     | downstream                           | 10.00    |
| XM_892822                             | LOC628100     | similar to F-box only protein 39                                                | 11  | 72,127,946 | 72,132,921 | -5210                    | upstream                             | 10.00    |
| NM_011569                             | Tekt1         | tektin 1                                                                        | 11  | 72,158,222 | 72,175,382 | 23414                    | downstream                           | 6.00     |
| NM_177776                             | D130058I21Rik | RIKEN cDNA D130058I21 gene                                                      | 11  | 72,203,616 | 72,225,215 | 927                      | in gene                              | 6.00     |
| NM_027819                             | Ggt6          | gamma-glutamyltransferase 6                                                     | 11  | 72,249,028 | 72,251,909 | 5788                     | downstream                           | 7.00     |
| NM_016776                             | Mybbp1a       | MYB binding protein (P160) 1a                                                   | 11  | 72,254,880 | 72,265,052 | -64                      | upstream                             | 7.00     |
| NM_018883                             | Camkk1        | calcium/calmodulin-dependent protein kinase 1, alpha                            | 11  | 72,832,510 | 72,855,575 | 18386                    | in gene                              | 6.00     |
| NM_145099                             | Trpv3         | transient receptor potential cation channel, subfamily V, member 3              | 11  | 73,081,122 | 73,110,702 | 34334                    | downstream                           | 5.00     |
| NM_023113                             | Aspa          | aspartoacylase (aminoacylase) 2                                                 | 11  | 73,118,490 | 73,138,136 | 22680                    | downstream                           | 5.00     |
| NM_001015046                          | Gaml4         | GTPase activating RANGAP domain-like 4                                          | 11  | 74,196,985 | 74,403,660 | 63548                    | in gene                              | 8.00     |
| NM_197943                             | Rutbc1        | RUN and TBC1 domain containing 1                                                | 11  | 74,662,766 | 74,710,582 | 518                      | in gene                              | 6.00     |
| NM_177325                             | Tsr1          | TSR1, 20S rRNA accumulation, homolog (yeast)                                    | 11  | 74,711,582 | 74,722,842 | -1518                    | upstream                             | 6.00     |
| NM_013761                             | Srr           | serine racemase                                                                 | 11  | 74,720,298 | 74,739,205 | 29141                    | downstream                           | 6.00     |
| NM_177708                             | Rtn4r1        | reticulum 4 receptor-like 1                                                     | 11  | 75,007,495 | 75,081,264 | 69593                    | in gene                              | 7.00     |
| NM_001004157                          | Scarf1        | scavenger receptor class F, member 1                                            | 11  | 75,327,043 | 75,340,082 | 16973                    | downstream                           | 6.00     |
| NM_173388                             | Slc43a2       | solute carrier family 43, member 2                                              | 11  | 75,345,210 | 75,388,543 | -1194                    | upstream                             | 6.00     |
| NM_008916                             | Pps           | putative phosphatase                                                            | 11  | 75,444,522 | 75,462,367 | 17286, 20278, 25382      | in gene, downstream, downstream      | 7.00     |
| NM_001080774, NM_001080775, NM_008659 | Myo1c         | myosin IC                                                                       | 11  | 75,465,011 | 75,488,145 | -3203, -211, 4893, 19853 | upstream, upstream, in gene, in gene | 6.50     |
| NM_133656                             | Crk           | v-crk sarcoma virus CT10 oncogene homolog (avian)                               | 11  | 75,492,812 | 75,519,596 | -7948                    | upstream                             | 5.00     |
| NM_026664                             | Vps53         | vacuolar protein sorting 53 (yeast)                                             | 11  | 75,859,728 | 75,993,132 | 71841                    | in gene                              | 4.00     |
| NM_008750                             | Nxn           | nucleoredoxin                                                                   | 11  | 76,070,738 | 76,212,626 | 136191                   | in gene                              | 4.00     |
| NM_177710                             | Ssh2          | slingshot homolog 2 (Drosophila)                                                | 11  | 77,029,927 | 77,269,050 | -247                     | upstream                             | 9.00     |
| NM_144825                             | Taok1         | TAO kinase 1                                                                    | 11  | 77,342,664 | 77,421,317 | -91                      | upstream                             | 7.00     |
| NM_001024205                          | Nufip2        | nuclear fragile X mental retardation protein interacting protein 2              | 11  | 77,499,657 | 77,531,468 | 32519                    | downstream                           | 5.00     |
| NM_009965                             | Cryba1        | crystallin, beta A1                                                             | 11  | 77,532,234 | 77,538,795 | 6619                     | downstream                           | 5.00     |
| NM_001040403, NM_008028               | Flot2         | flotillin 2                                                                     | 11  | 77,851,443 | 77,873,934 | 21053                    | in gene                              | 6.00     |
| NM_009143                             | Sdf2          | stromal cell derived factor 2                                                   | 11  | 78,059,248 | 78,068,988 | 16032                    | downstream                           | 6.00     |
| NM_001002004                          | 2610507B11Rik | RIKEN cDNA 2610507B11 gene                                                      | 11  | 78,075,258 | 78,104,125 | 22                       | in gene                              | 6.00     |
| NM_172795                             | A83009115Rik  | RIKEN cDNA A83009115 gene                                                       | 11  | 78,286,793 | 78,311,205 | -3131                    | upstream                             | 4.00     |
| NM_011707                             | Vtn           | vitronectin                                                                     | 11  | 78,312,788 | 78,315,826 | 1548                     | in gene                              | 4.00     |
| NM_008759                             | Og9x          | OG9 homeobox gene                                                               | 11  | 78,317,015 | 78,318,583 | -2679                    | upstream                             | 4.00     |
| NM_199199                             | AI316787      | expressed sequence AI316787                                                     | 11  | 78,320,560 | 78,325,670 | 11334                    | downstream                           | 4.00     |
| NM_026389                             | Poldip2       | polymerase (DNA-directed), delta interacting protein 2                          | 11  | 78,325,798 | 78,336,238 | 13258, 14490             | downstream, downstream               | 5.00     |
| NM_009395                             | Tnfaip1       | tumor necrosis factor, alpha-induced protein 1 (endothelial)                    | 11  | 78,336,350 | 78,349,696 | 10640, 9408              | in gene, in gene                     | 5.00     |
| NM_018854                             | Ift20         | intraflagellar transport 20 homolog (Chlamydomonas)                             | 11  | 78,349,938 | 78,354,975 | -9650                    | upstream                             | 5.00     |
| NM_175543                             | Rab11fip4     | RAB11 family interacting protein 4 (class II)                                   | 11  | 79,404,714 | 79,507,514 | 70251                    | in gene                              | 5.00     |
|                                       | Mirn365-2     | microRNA 365-2                                                                  | 11  | 79,539,901 | 79,540,012 | -3677                    | upstream                             | 6.00     |
| NM_018776                             | Crif3         | cytokine receptor-like factor 3                                                 | 11  | 79,860,001 | 79,894,459 | 28262                    | in gene                              | 5.00     |
| NM_139228                             | Rhbd13        | rhomboid, veinlet-like 3 (Drosophila)                                           | 11  | 80,114,578 | 80,169,457 | -8994                    | upstream                             | 6.00     |
| NM_019816                             | Aatf          | apoptosis antagonizing transcription factor                                     | 11  | 84,236,358 | 84,327,003 | 5419                     | in gene                              | 4.00     |
| NM_153144                             | Ggnbp2        | gametogenetin binding protein 2                                                 | 11  | 84,645,863 | 84,684,240 | -9568                    | upstream                             | 8.00     |

| Accession No.                                                | Symbol        | Gene Title                                                                                                     | Chr | Gene Start  | Gene End    | Interval Dists to Start | Interval Pos         | Avg Peak |
|--------------------------------------------------------------|---------------|----------------------------------------------------------------------------------------------------------------|-----|-------------|-------------|-------------------------|----------------------|----------|
| NM_001077636,<br>NM_027388                                   | Pigw          | phosphatidylinositol glycan anchor biosynthesis, class W                                                       | 11  | 84,689,815  | 84,693,787  | -21, -3245              | upstream, upstream   | 6.50     |
| NM_001003908                                                 | Cltc          | clathrin, heavy polypeptide (Hc)                                                                               | 11  | 86,508,155  | 86,570,994  | -590                    | upstream             | 8.00     |
| NM_025638                                                    | Gdpd1         | glycerophosphodiester phosphodiesterase domain containing 1                                                    | 11  | 86,847,390  | 86,887,550  | 42574                   | downstream           | 5.00     |
| NM_031386                                                    | Test14        | testis expressed gene 14                                                                                       | 11  | 87,299,788  | 87,369,325  | 53780                   | in gene              | 6.00     |
| NM_133215                                                    | Mttr4         | myotubularin related protein 4                                                                                 | 11  | 87,405,719  | 87,429,798  | 19177                   | in gene              | 6.00     |
| NM_001045527                                                 | Hsf5          | heat shock transcription factor family member 5                                                                | 11  | 87,430,666  | 87,473,044  | -5770                   | upstream             | 6.00     |
| NM_026556                                                    | Dynl12        | dynein light chain LC8-type 2                                                                                  | 11  | 87,793,035  | 87,801,007  | -145                    | upstream             | 7.00     |
| NM_016686                                                    | Vezf1         | vascular endothelial zinc finger 1                                                                             | 11  | 87,881,843  | 87,898,231  | -179                    | upstream             | 6.00     |
| NM_054043                                                    | Msi2          | Musashi homolog 2 (Drosophila)                                                                                 | 11  | 88,152,884  | 88,403,651  | 55747, 49667            | in gene, in gene     | 6.00     |
| NM_001042541,<br>NM_009648                                   | Akap1         | A kinase (PRKA) anchor protein 1                                                                               | 11  | 88,692,106  | 88,725,900  | 76                      | in gene              | 7.00     |
| NM_008796                                                    | Pctp          | phosphatidylcholine transfer protein                                                                           | 11  | 89,844,731  | 89,864,208  | 22400                   | downstream           | 4.00     |
| NM_172563                                                    | Hlf           | hepatic leukemia factor                                                                                        | 11  | 90,197,849  | 90,252,231  | 10823, -132             | in gene, upstream    | 5.50     |
| NM_028011                                                    | Tom11         | target of myb1-like 1 (chicken)                                                                                | 11  | 90,507,005  | 90,548,915  | 23619                   | in gene              | 6.00     |
| NM_001025428,<br>NM_001025429,<br>NM_001025430,<br>NM_027569 | Spag9         | sperm associated antigen 9                                                                                     | 11  | 93,857,405  | 93,987,397  | 803                     | in gene              | 5.00     |
| XM_001473216                                                 | LOC100039440  | hypothetical protein LOC100039440                                                                              | 11  | 93,999,844  | 94,017,090  | 18764                   | downstream           | 5.00     |
| NM_181819                                                    | Wfikkn2       | WAP, follistatin/kazal, immunoglobulin, kunitz and netrin domain containing 2                                  | 11  | 94,098,912  | 94,103,863  | 6135, -361              | downstream, upstream | 8.50     |
| NM_009783                                                    | Cacna1g       | calcium channel, voltage-dependent, T type, alpha 1G subunit                                                   | 11  | 94,269,830  | 94,335,039  | 41087, 12543            | in gene, in gene     | 6.00     |
| NM_001013381                                                 | Rsad1         | radical S-adenosyl methionine domain containing 1                                                              | 11  | 94,401,112  | 94,410,513  | -15                     | upstream             | 6.00     |
| NM_007742                                                    | Col1a1        | procollagen, type I, alpha 1                                                                                   | 11  | 94,797,584  | 94,813,181  | 688                     | in gene              | 6.00     |
| NM_007867                                                    | Dlx4          | distal-less homeobox 4                                                                                         | 11  | 95,001,770  | 95,007,577  | 153                     | in gene              | 6.00     |
| NM_172543                                                    | 5730593F17Rik | RIKEN cDNA 5730593F17 gene                                                                                     | 11  | 95,198,332  | 95,243,184  | 356, 33028              | in gene, in gene     | 7.00     |
| XM_112540,<br>XM_923886                                      | Gm53          | gene model 53, (NCBI)                                                                                          | 11  | 96,112,908  | 96,125,798  | 1380, 20500             | in gene, downstream  | 5.00     |
|                                                              | Mir196a-1     | microRNA 196a-1                                                                                                | 11  | 96,126,477  | 96,126,578  | 6931                    | downstream           | 5.00     |
| NM_008270                                                    | Hoxb9         | homeo box B9                                                                                                   | 11  | 96,132,644  | 96,137,909  | 764                     | in gene              | 5.00     |
| NM_010461                                                    | Hoxb8         | homeo box B8                                                                                                   | 11  | 96,143,219  | 96,146,639  | -9811                   | upstream             | 5.00     |
| NR_003293                                                    | D030028A08Rik | RIKEN cDNA D030028A08 gene                                                                                     | 11  | 96,805,504  | 96,826,374  | 12656                   | in gene              | 8.00     |
| NM_001080964,<br>NM_030220                                   | Sp2           | Sp2 transcription factor                                                                                       | 11  | 96,814,651  | 96,839,002  | 20842                   | in gene              | 8.00     |
| NM_026154                                                    | Mrpl10        | mitochondrial ribosomal protein L10                                                                            | 11  | 96,902,900  | 96,910,527  | 10820                   | downstream           | 4.00     |
| NM_001081434                                                 | Osbpl7        | oxysterol binding protein-like 7                                                                               | 11  | 96,912,134  | 96,930,218  | 1586                    | in gene              | 4.00     |
| NM_198100                                                    | Tbkbp1        | TBK1 binding protein 1                                                                                         | 11  | 96,997,487  | 97,011,026  | -2990                   | upstream             | 7.00     |
| NM_021493                                                    | 4933428G20Rik | RIKEN cDNA 4933428G20 gene                                                                                     | 11  | 97,311,474  | 97,363,714  | 286                     | in gene              | 8.00     |
| NM_001081435                                                 | Fbxo47        | F-box protein 47                                                                                               | 11  | 97,715,621  | 97,745,468  | -4                      | upstream             | 5.00     |
| NM_028199                                                    | Plxdc1        | plexin domain containing 1                                                                                     | 11  | 97,784,552  | 97,847,694  | -8178                   | upstream             | 5.00     |
| NM_207231                                                    | Arl5c         | ADP-ribosylation factor-like 5C                                                                                | 11  | 97,850,892  | 97,857,487  | 1615                    | in gene              | 5.00     |
| NM_031173,<br>NM_145121                                      | Cacnb1        | calcium channel, voltage-dependent, beta 1 subunit                                                             | 11  | 97,864,215  | 97,884,337  | 28465                   | downstream           | 5.00     |
| NM_001080118,<br>NM_013634,<br>NM_134027                     | Pparbp        | peroxisome proliferator activated receptor binding protein                                                     | 11  | 98,013,468  | 98,054,607  | 175                     | in gene              | 6.00     |
| XM_001473891                                                 | LOC100039982  | hypothetical protein LOC100039982                                                                              | 11  | 98,064,101  | 98,064,612  | 10180                   | downstream           | 6.00     |
| NM_001003817                                                 | ErbB2         | v-erb-b2 erythroblastic leukemia viral oncogene homolog 2, neuro/glioblastoma derived oncogene homolog (avian) | 11  | 98,273,798  | 98,299,030  | 22442                   | in gene              | 5.00     |
| NM_025559                                                    | 1810046J19Rik | RIKEN cDNA 1810046J19 gene                                                                                     | 11  | 98,299,022  | 98,300,302  | 4062                    | downstream           | 5.00     |
| NM_178060                                                    | Thra          | thyroid hormone receptor alpha                                                                                 | 11  | 98,603,187  | 98,626,425  | 15789                   | in gene              | 6.00     |
| NM_028722                                                    | 4121402D02Rik | RIKEN cDNA 4121402D02 gene                                                                                     | 11  | 98,656,830  | 98,667,741  | -318                    | upstream             | 6.00     |
| NM_138660                                                    | Casc3         | cancer susceptibility candidate 3                                                                              | 11  | 98,666,219  | 98,695,121  | -9707                   | upstream             | 6.00     |
| NM_009024                                                    | Rara          | retinoic acid receptor, alpha                                                                                  | 11  | 98,799,010  | 98,836,256  | 17310                   | in gene              | 5.00     |
| NM_172564                                                    | Tns4          | tensin 4                                                                                                       | 11  | 98,926,993  | 98,950,616  | 17048                   | in gene              | 7.00     |
| NM_176830                                                    | 1110036O03Rik | RIKEN cDNA 1110036O03 gene                                                                                     | 11  | 100,270,062 | 100,276,133 | 213                     | in gene              | 7.00     |
| NM_010221                                                    | Fkbp10        | FK506 binding protein 10                                                                                       | 11  | 100,277,011 | 100,286,139 | -1091, 17901            | upstream, downstream | 6.50     |
| NM_026561                                                    | Nt5c3l        | 5'-nucleotidase, cytosolic III-like                                                                            | 11  | 100,283,635 | 100,302,388 | 26468, 7476             | downstream, in gene  | 6.50     |
| NM_025727                                                    | Klhl10        | kelch-like 10 (Drosophila)                                                                                     | 11  | 100,303,238 | 100,318,338 | -8326                   | upstream             | 6.00     |
| NM_028918                                                    | Ttc25         | tetratricopeptide repeat domain 25                                                                             | 11  | 100,406,946 | 100,433,880 | 34286                   | downstream           | 4.00     |
| NM_009923                                                    | Cnp1          | cyclic nucleotide phosphodiesterase 1                                                                          | 11  | 100,436,289 | 100,443,039 | 4943                    | in gene              | 4.00     |
| NM_019795                                                    | Dnajc7        | DnaJ (Hsp40) homolog, subfamily C, member 7                                                                    | 11  | 100,444,150 | 100,481,482 | 40250                   | downstream           | 4.00     |
| NM_016920                                                    | Atp6v0a1      | ATPase, H+ transporting, lysosomal V0 subunit A1                                                               | 11  | 100,870,769 | 100,925,028 | 9935, 38927             | in gene, in gene     | 4.50     |
| NM_134028                                                    | Tubg2         | tubulin, gamma 2                                                                                               | 11  | 101,017,235 | 101,023,101 | 11853                   | downstream           | 8.00     |
| NM_146030                                                    | Plekhh3       | pleckstrin homology domain containing, family H (with MyTH4 domain) member 3                                   | 11  | 101,023,993 | 101,032,616 | 3528                    | in gene              | 8.00     |
| NM_007721                                                    | Ccr10         | chemokine (C-C motif) receptor 10                                                                              | 11  | 101,034,312 | 101,036,757 | 7669                    | downstream           | 8.00     |
| NM_016782                                                    | Cntnap1       | contactin associated protein-like 1                                                                            | 11  | 101,037,431 | 101,052,034 | -8343                   | upstream             | 8.00     |
| NM_007970                                                    | Ezh1          | enhancer of zeste homolog 1 (Drosophila)                                                                       | 11  | 101,052,430 | 101,089,262 | -2962                   | upstream             | 8.00     |
| NM_019584                                                    | Becn1         | beclin 1 (coiled-coil, myosin-like BCL2-interacting protein)                                                   | 11  | 101,149,581 | 101,163,581 | -67                     | upstream             | 5.00     |

| Accession No.                 | Symbol        | Gene Title                                                                         | Chr | Gene Start  | Gene End    | Interval Dists to Start   | Interval Pos                         | Avg Peak |
|-------------------------------|---------------|------------------------------------------------------------------------------------|-----|-------------|-------------|---------------------------|--------------------------------------|----------|
| NM_008815                     | Etv4          | ets variant gene 4 (E1A enhancer binding protein, E1AF)                            | 11  | 101,631,056 | 101,646,624 | -2096, -6005              | upstream, upstream                   | 5.50     |
| NM_001044383,<br>NM_011551    | Ubtf          | upstream binding transcription factor, RNA polymerase I                            | 11  | 102,165,874 | 102,180,410 | 11514                     | in gene                              | 6.00     |
| NM_016759                     | Rap2ip        | Rap2 interacting protein                                                           | 11  | 102,254,990 | 102,263,867 | 13714                     | downstream                           | 9.00     |
| NM_026542                     | Slc25a39      | solute carrier family 25, member 39                                                | 11  | 102,264,461 | 102,268,786 | 82                        | in gene                              | 9.00     |
| NM_008175                     | Gm            | granulin                                                                           | 11  | 102,291,821 | 102,298,119 | 3667                      | in gene                              | 5.00     |
| NM_199200                     | BC025575      | cDNA sequence BC025575                                                             | 11  | 102,298,295 | 102,308,977 | 13489                     | downstream                           | 5.00     |
| XM_001475276                  | LOC100040792  | hypothetical protein LOC100040792                                                  | 11  | 102,437,709 | 102,442,716 | 2828, 1948, 1372          | in gene, in gene, in gene            | 5.00     |
| NM_020510                     | Fzd2          | frizzled homolog 2 (Drosophila)                                                    | 11  | 102,465,745 | 102,469,372 | -9660, 47                 | upstream, in gene                    | 4.50     |
| NM_080846                     | Higd1b        | HIG1 domain family, member 1B                                                      | 11  | 102,697,610 | 102,699,354 | 5158                      | downstream                           | 5.00     |
| NM_011431                     | Eftud2        | elongation factor Tu GTP binding domain containing 2                               | 11  | 102,699,791 | 102,742,231 | 39463, -5161              | in gene, upstream                    | 5.00     |
| NM_028492                     | Ccdc103       | coiled-coil domain containing 103                                                  | 11  | 102,742,558 | 102,746,529 | 4834                      | downstream                           | 5.00     |
| XM_001479358                  | LOC100042500  | similar to Coiled-coil domain containing 103                                       | 11  | 102,745,870 | 102,748,045 | 1522                      | in gene                              | 5.00     |
| NM_010277                     | Gfap          | glial fibrillary acidic protein                                                    | 11  | 102,749,991 | 102,758,445 | 11053                     | downstream                           | 5.00     |
| NM_026551                     | Dcakd         | dephospho-CoA kinase domain containing                                             | 11  | 102,855,370 | 102,878,461 | 15597                     | in gene                              | 5.00     |
| NM_001038609,<br>NM_010838    | Mapt          | microtubule-associated protein tau                                                 | 11  | 104,092,750 | 104,193,410 | 76914                     | in gene                              | 4.00     |
| NM_001081045                  | 1700081L11Rik | RIKEN cDNA 1700081L11 gene                                                         | 11  | 104,194,543 | 104,303,605 | 84458                     | in gene                              | 6.00     |
| XM_110936,<br>XM_907217       | EG217246      | predicted gene, EG217246                                                           | 11  | 105,856,045 | 105,866,757 | 17827                     | downstream                           | 5.00     |
| NM_001037712                  | Kcnh6         | potassium voltage-gated channel, subfamily H (eag-related), member 6               | 11  | 105,869,517 | 105,895,378 | 4355, 10483               | in gene, in gene                     | 6.00     |
| NM_027946                     | Wdr68         | WD repeat domain 68                                                                | 11  | 105,898,186 | 105,920,638 | 12630                     | in gene                              | 5.00     |
| NM_011947                     | Map3k3        | mitogen activated protein kinase kinase kinase 3                                   | 11  | 105,946,216 | 106,016,760 | 27832                     | in gene                              | 5.00     |
| NM_028074                     | Ddx42         | DEAD (Asp-Glu-Ala-Asp) box polypeptide 42                                          | 11  | 106,078,240 | 106,110,453 | 42112                     | downstream                           | 7.00     |
| NM_025310                     | Ftsj3         | FtsJ homolog 3 (E. coli)                                                           | 11  | 106,110,458 | 106,117,116 | -3236                     | upstream                             | 7.00     |
| XM_001476085                  | LOC100041277  | hypothetical protein LOC100041277                                                  | 11  | 106,360,284 | 106,362,528 | 2052                      | in gene                              | 7.00     |
| NM_198292                     | Tex2          | testis expressed gene 2                                                            | 11  | 106,363,453 | 106,474,244 | 111908                    | downstream                           | 7.00     |
| NM_001033435                  | Gm885         | gene model 885, (NCBI)                                                             | 11  | 106,612,582 | 106,628,882 | 5562                      | in gene                              | 5.00     |
| NM_015810                     | Polg2         | polymerase (DNA directed), gamma 2, accessory subunit                              | 11  | 106,629,620 | 106,640,756 | -9068                     | upstream                             | 9.00     |
| NM_007840                     | Ddx5          | DEAD (Asp-Glu-Ala-Asp) box polypeptide 5                                           | 11  | 106,641,670 | 106,649,808 | -16                       | upstream                             | 9.00     |
| NM_177088                     | Ccdc45        | coiled-coil domain containing 45                                                   | 11  | 106,650,589 | 106,680,143 | -765                      | upstream                             | 9.00     |
| NM_010655                     | Kpna2         | karyopherin (importin) alpha 2                                                     | 11  | 106,849,943 | 106,860,839 | -137                      | upstream                             | 9.00     |
| NM_145823                     | Pitpnc1       | phosphatidylinositol transfer protein, cytoplasmic 1                               | 11  | 107,069,206 | 107,332,034 | 154818, 76386, -94, -8686 | in gene, in gene, upstream, upstream | 5.75     |
| NM_025894                     | Psmd12        | proteasome (prosome, macropain) 26S subunit, non-ATPase, 12                        | 11  | 107,340,842 | 107,359,350 | -8714, -122               | upstream, upstream                   | 6.00     |
| NM_011101                     | Prkca         | protein kinase C, alpha                                                            | 11  | 107,799,562 | 108,205,242 | 72154, 18938              | in gene, in gene                     | 6.00     |
| NM_015732                     | Axin2         | axin2                                                                              | 11  | 108,781,680 | 108,812,097 | 776                       | in gene                              | 5.00     |
| XM_196056,<br>XM_920629       | E030025P04Rik | RIKEN cDNA E030025P04 gene                                                         | 11  | 109,000,603 | 109,005,685 | 4341, -43                 | in gene, upstream                    | 7.50     |
| XM_001477505,<br>XM_001480042 | 1700096J18Rik | RIKEN cDNA 1700096J18 gene                                                         | 11  | 109,208,181 | 109,214,965 | 15707                     | downstream                           | 7.00     |
| NM_010303                     | Gna13         | guanine nucleotide binding protein, alpha 13                                       | 11  | 109,224,108 | 109,262,683 | -220                      | upstream                             | 7.00     |
| NM_011943                     | Map2k6        | mitogen activated protein kinase kinase 6                                          | 11  | 110,260,436 | 110,374,951 | -3124                     | upstream                             | 5.00     |
| NM_027216                     | Slc39a11      | solute carrier family 39 (metal ion transporter), member 11                        | 11  | 113,106,169 | 113,427,075 | 84195                     | in gene                              | 7.00     |
| NM_172800                     | Sdk2          | sidekick homolog 2 (chicken)                                                       | 11  | 113,642,104 | 113,927,265 | 119249, 88865, 1          | in gene, in gene, in gene            | 6.00     |
| XM_001476930                  | LOC100041739  | hypothetical protein LOC100041739                                                  | 11  | 113,931,224 | 113,956,640 | -3960                     | upstream                             | 6.00     |
| NM_173048                     | Gga3          | golgi associated, gamma adaptin ear containing, ARF binding protein 3              | 11  | 115,445,569 | 115,465,220 | -5020                     | upstream                             | 6.00     |
| NM_025305                     | Mrps7         | mitochondrial ribosomal protein S7                                                 | 11  | 115,465,465 | 115,468,938 | 4775                      | downstream                           | 6.00     |
| NM_027162                     | Mif4gd        | MIF4G domain containing                                                            | 11  | 115,469,232 | 115,473,817 | 3577                      | in gene                              | 6.00     |
| NM_026071                     | Slc25a19      | solute carrier family 25 (mitochondrial thiamine pyrophosphate carrier), member 19 | 11  | 115,476,297 | 115,489,453 | 19213                     | downstream                           | 6.00     |
| NM_020483                     | Sap30bp       | SAP30 binding protein                                                              | 11  | 115,794,973 | 115,826,848 | 13027                     | in gene                              | 6.00     |
| NM_016905                     | Galk1         | galactokinase 1                                                                    | 11  | 115,869,671 | 115,874,033 | -8063                     | upstream                             | 5.00     |
| NM_008211                     | H3f3b         | H3 histone, family 3B                                                              | 11  | 115,883,275 | 115,885,818 | 3722                      | downstream                           | 5.00     |
| NM_172569                     | Unk           | unkempt homolog (Drosophila)                                                       | 11  | 115,891,636 | 115,922,508 | -9540                     | upstream                             | 5.00     |
| NM_024177                     | Mrpl38        | mitochondrial ribosomal protein L38                                                | 11  | 115,993,131 | 116,000,182 | -10165                    | upstream                             | 5.00     |
| NM_172571                     | Fbf1          | Fas (TNFRSF6) binding factor 1                                                     | 11  | 116,003,599 | 116,029,492 | 19145, 5124               | in gene, in gene                     | 5.00     |
| NM_015729                     | Acox1         | acyl-Coenzyme A oxidase 1, palmitoyl                                               | 11  | 116,033,202 | 116,060,359 | 35991                     | downstream                           | 5.00     |
| XM_181318,<br>XM_910489       | 2310004N24Rik | RIKEN cDNA 2310004N24 gene                                                         | 11  | 116,060,169 | 116,076,634 | 22679                     | downstream                           | 5.00     |
| NM_027165                     | Cdk3          | cyclin-dependent kinase 3                                                          | 11  | 116,077,854 | 116,081,599 | 4994                      | downstream                           | 5.00     |
| NM_025276                     | Evpl          | envoplakin                                                                         | 11  | 116,081,873 | 116,099,405 | 16557, -5299              | in gene, upstream                    | 5.00     |
| NM_146032                     | Srp68         | signal recognition particle 68                                                     | 11  | 116,106,480 | 116,135,531 | 30827                     | downstream                           | 5.00     |
| NM_010254                     | Galr2         | galanin receptor 2                                                                 | 11  | 116,142,253 | 116,145,229 | 8019                      | downstream                           | 6.00     |
| NM_172948                     | Mgat5b        | mannoside acetylglucosaminyltransferase 5, isoenzyme B                             | 11  | 116,780,177 | 116,848,258 | 35455                     | in gene                              | 6.00     |
| XM_001477442                  | LOC100042036  | hypothetical protein LOC100042036                                                  | 11  | 116,899,603 | 116,976,757 | 50517                     | in gene                              | 5.00     |
| NM_017380                     | Sept9         | septin 9                                                                           | 11  | 117,193,034 | 117,223,621 | 26438                     | in gene                              | 4.00     |
| NM_001012273,<br>NM_009689    | Birc5         | baculoviral IAP repeat-containing 5                                                | 11  | 117,710,551 | 117,717,057 | 16057                     | downstream                           | 6.00     |

| Accession No.                 | Symbol        | Gene Title                                                                             | Chr | Gene Start  | Gene End    | Interval Dists to Start | Interval Pos           | Avg Peak |
|-------------------------------|---------------|----------------------------------------------------------------------------------------|-----|-------------|-------------|-------------------------|------------------------|----------|
| XM_621267,<br>XM_911377       | LOC546519     | hypothetical LOC546519                                                                 | 11  | 117,722,066 | 117,725,673 | 4542                    | downstream             | 6.00     |
| NM_027919                     | Tha1          | threonine aldolase 1                                                                   | 11  | 117,729,265 | 117,734,795 | 8187                    | downstream             | 6.00     |
| NM_007707                     | Socs3         | suppressor of cytokine signaling 3                                                     | 11  | 117,827,393 | 117,830,476 | 5676                    | downstream             | 6.00     |
| XM_001481301,<br>XM_126677    | Dnahc17       | dynein, axonemal, heavy chain 17                                                       | 11  | 117,883,037 | 117,990,533 | 36597                   | in gene                | 4.00     |
| NM_011180                     | Pscd1         | pleckstrin homology, Sec7 and coiled-coil domains 1                                    | 11  | 118,025,489 | 118,109,874 | 63474                   | in gene                | 7.00     |
| NM_019959                     | C1qtnf1       | C1q and tumor necrosis factor related protein 1                                        | 11  | 118,295,167 | 118,311,277 | -455, 2977              | upstream, in gene      | 5.50     |
| NM_001030291                  | Enpp7         | ectonucleotide pyrophosphatase/phosphodiesterase 7                                     | 11  | 118,849,502 | 118,854,155 | 11282                   | downstream             | 7.00     |
| NM_013926                     | Cbx8          | chromobox homolog 8 (Drosophila Pc class)                                              | 11  | 118,899,750 | 118,902,227 | -3277                   | upstream               | 4.00     |
| NM_175430                     | Ccdc40        | coiled-coil domain containing 40                                                       | 11  | 119,089,886 | 119,126,526 | 21010                   | in gene                | 7.00     |
| NM_130886                     | Card14        | caspase recruitment domain family, member 14                                           | 11  | 119,176,101 | 119,206,689 | 38523                   | downstream             | 5.00     |
| NM_018822                     | Sgsh          | N-sulfoglucosamine sulfohydrolase (sulfamidase)                                        | 11  | 119,204,803 | 119,216,824 | 2200                    | in gene                | 5.00     |
| NM_178743                     | Slc26a11      | solute carrier family 26, member 11                                                    | 11  | 119,216,871 | 119,242,390 | -2247                   | upstream               | 5.00     |
| XM_126613,<br>XM_917071       | Chmp6         | chromatin modifying protein 6                                                          | 11  | 119,775,124 | 119,780,866 | -3199                   | upstream               | 5.00     |
| NM_008244                     | Hgs           | HGF-regulated tyrosine kinase substrate                                                | 11  | 120,329,005 | 120,345,293 | 22075                   | downstream             | 5.00     |
| NM_027204                     | Mpl12         | mitochondrial ribosomal protein L12                                                    | 11  | 120,345,983 | 120,350,068 | 5097                    | downstream             | 5.00     |
| NM_013770                     | Slc25a10      | solute carrier family 25 (mitochondrial carrier, dicarboxylate transporter), member 10 | 11  | 120,353,186 | 120,360,480 | -2106                   | upstream               | 5.00     |
| NM_008101                     | Gcgr          | glucagon receptor                                                                      | 11  | 120,390,586 | 120,400,402 | 12902                   | downstream             | 5.00     |
| NM_001033231                  | BC003940      | cDNA sequence BC003940                                                                 | 11  | 120,404,202 | 120,411,041 | 7553                    | downstream             | 5.00     |
| NM_026814                     | Dysflp1       | dysferlin interacting protein 1                                                        | 11  | 120,411,289 | 120,412,446 | 8958                    | downstream             | 5.00     |
| NM_001038230,<br>NM_025389    | Anapc11       | anaphase promoting complex subunit 11 homolog (yeast)                                  | 11  | 120,459,751 | 120,469,512 | 11001, 14505            | downstream, downstream | 4.00     |
| NM_153288                     | Npb           | neuropeptide B                                                                         | 11  | 120,469,791 | 120,470,414 | 961, 4465               | downstream, downstream | 4.00     |
| NM_144795                     | Pycr1         | pyrroline-5-carboxylate reductase 1                                                    | 11  | 120,497,026 | 120,504,984 | 9992                    | downstream             | 6.00     |
| NM_145370                     | Gps1          | G protein pathway suppressor 1                                                         | 11  | 120,645,829 | 120,650,416 | 11947                   | downstream             | 9.00     |
| NM_026824                     | Dus1l         | dihydrouridine synthase 1-like (S. cerevisiae)                                         | 11  | 120,650,516 | 120,657,709 | -67                     | upstream               | 9.00     |
| NM_007988                     | Fasn          | fatty acid synthase                                                                    | 11  | 120,667,272 | 120,685,861 | 28085, 485              | downstream, in gene    | 7.50     |
| NM_027745                     | Ccdc57        | coiled-coil domain containing 57                                                       | 11  | 120,687,856 | 120,794,186 | 108810, 58810           | downstream, in gene    | 6.50     |
| NM_027874,<br>NM_139059       | Csnk1d        | casein kinase 1, delta                                                                 | 11  | 120,823,055 | 120,852,647 | 1223                    | in gene                | 5.00     |
| NM_025402                     | 1110031I02Rik | RIKEN cDNA 1110031I02 gene                                                             | 11  | 121,038,907 | 121,065,962 | 5210                    | in gene                | 7.00     |
| NM_001001333                  | Hexdc         | hexosaminidase (glycosyl hydrolase family 20, catalytic domain) containing             | 11  | 121,069,017 | 121,083,961 | -8265                   | upstream               | 7.00     |
| NM_026272                     | Narf          | nuclear prelamins A recognition factor                                                 | 11  | 121,098,567 | 121,117,169 | 22489                   | downstream             | 7.00     |
| NM_001080932                  | Foxk2         | forkhead box K2                                                                        | 11  | 121,116,808 | 121,171,210 | 4248                    | in gene                | 7.00     |
| NM_144797                     | Metrl         | metrelin, girin, cell differentiation regulator-like                                   | 11  | 121,563,741 | 121,578,703 | 5059                    | in gene                | 5.00     |
| XM_001477246                  | LOC100041946  | similar to 1700012B15Rik protein                                                       | 12  | 3,235,100   | 3,236,468   | 644                     | in gene                | 6.00     |
| XR_035176,<br>XR_035415       | 1700012B15Rik | RIKEN cDNA 1700012B15 gene                                                             | 12  | 3,235,511   | 3,238,286   | 233                     | in gene                | 6.00     |
| XM_001472910,<br>XM_001480129 | Atad2b        | ATPase family, AAA domain containing 2B                                                | 12  | 4,924,159   | 5,054,216   | 641                     | in gene                | 5.00     |
| XM_906219,<br>XM_978355       | Klhl29        | kelch-like 29 (Drosophila)                                                             | 12  | 5,084,275   | 5,382,806   | 256150, 183958          | in gene, in gene       | 6.00     |
| NM_008640                     | Laptm4a       | lysosomal-associated protein transmembrane 4A                                          | 12  | 8,928,113   | 8,945,548   | -4049                   | upstream               | 5.00     |
| NM_029007                     | AW125753      | expressed sequence AW125753                                                            | 12  | 14,154,404  | 14,158,844  | 1964                    | in gene                | 7.00     |
| NM_015763,<br>NM_172950       | Lpin1         | lipin 1                                                                                | 12  | 16,543,442  | 16,596,576  | 56299                   | downstream             | 5.00     |
| XM_001001921                  | EG668514      | predicted gene, EG668514                                                               | 12  | 17,072,201  | 17,076,244  | 4999                    | downstream             | 5.00     |
| NM_001081977,<br>NM_080563    | Rnf144        | ring finger protein 144                                                                | 12  | 26,991,662  | 27,100,121  | 106985                  | in gene                | 6.00     |
| NM_181395                     | Pxdn          | peroxidasin homolog (Drosophila)                                                       | 12  | 30,622,901  | 30,700,724  | 4603                    | in gene                | 5.00     |
| NM_008482                     | Lamb1-1       | laminin B1 subunit 1                                                                   | 12  | 31,950,159  | 32,014,504  | 22193                   | in gene                | 6.00     |
| NM_134048                     | Cbl1          | Casitas B-lineage lymphoma-like 1                                                      | 12  | 32,171,761  | 32,184,405  | -891                    | upstream               | 4.00     |
| NM_011658                     | Twist1        | twist gene homolog 1 (Drosophila)                                                      | 12  | 34,642,536  | 34,644,696  | 9272                    | downstream             | 6.00     |
| NM_013464                     | Ahr           | aryl-hydrocarbon receptor                                                              | 12  | 36,182,651  | 36,219,661  | -19                     | upstream               | 7.00     |
| NM_007960                     | Etv1          | ets variant gene 1                                                                     | 12  | 39,506,897  | 39,594,790  | -1569                   | upstream               | 6.00     |
| NM_053122                     | Immp2l        | IMP2 inner mitochondrial membrane peptidase-like (S. cerevisiae)                       | 12  | 42,729,751  | 43,056,573  | 137865                  | in gene                | 6.00     |
| NM_007728                     | Coch          | coagulation factor C homolog (Limulus polyphemus)                                      | 12  | 52,694,442  | 52,706,760  | 374                     | in gene                | 5.00     |
| NM_052973                     | Strn3         | striatin, calmodulin binding protein 3                                                 | 12  | 52,710,619  | 52,792,873  | 137                     | in gene                | 6.00     |
| NM_021710                     | Ap4s1         | adaptor-related protein complex AP-4, sigma 1                                          | 12  | 52,792,024  | 52,839,918  | 712                     | in gene                | 6.00     |
| NM_207010                     | Mdga2         | MAM domain containing glycosylphosphatidylinositol anchor 2                            | 12  | 67,572,169  | 68,322,190  | 161742                  | in gene                | 13.00    |
| NM_027269                     | 1110034A24Rik | RIKEN cDNA 1110034A24 gene                                                             | 12  | 70,290,825  | 70,299,416  | 1416                    | in gene                | 6.00     |
| XR_035259,<br>XR_035390       | 9330151L19Rik | RIKEN cDNA 9330151L19 gene                                                             | 12  | 70,300,357  | 70,300,855  | -2357                   | upstream               | 6.00     |
| NM_011133                     | Pole2         | polymerase (DNA directed), epsilon 2 (p59 subunit)                                     | 12  | 70,302,766  | 70,329,177  | 31177                   | downstream             | 6.00     |

| Accession No.                                          | Symbol        | Gene Title                                                                               | Chr | Gene Start  | Gene End    | Interval Dists to Start   | Interval Pos                              | Avg Peak |
|--------------------------------------------------------|---------------|------------------------------------------------------------------------------------------|-----|-------------|-------------|---------------------------|-------------------------------------------|----------|
| NM_028127                                              | Frmd6         | FERM domain containing 6                                                                 | 12  | 71,926,501  | 72,003,221  | -464                      | upstream                                  | 6.00     |
| NM_011184                                              | Psma3         | proteasome (prosome, macropain) subunit, alpha type 3                                    | 12  | 72,075,680  | 72,095,908  | 5216                      | in gene                                   | 5.00     |
| NM_021532                                              | Dact1         | dapper homolog 1, antagonist of beta-catenin (xenopus)                                   | 12  | 72,410,971  | 72,419,881  | -171                      | upstream                                  | 5.00     |
| NM_026102, NM_172464                                   | Daam1         | dishevelled associated activator of morphogenesis 1                                      | 12  | 72,932,065  | 73,093,354  | -321, 119218              | upstream, in gene                         | 4.50     |
| XM_001001604, XM_983512                                | EG666385      | predicted gene, EG666385                                                                 | 12  | 74,894,470  | 74,909,398  | 3930                      | in gene                                   | 5.00     |
| XM_001001795, XM_001476702, XM_001476717, XM_001479426 | Wdr89         | WD repeat domain 89                                                                      | 12  | 76,731,581  | 76,770,524  | -324                      | upstream                                  | 6.00     |
| NM_028356                                              | Zbtb25        | zinc finger and BTB domain containing 25                                                 | 12  | 77,449,931  | 77,469,986  | 19570                     | in gene                                   | 4.00     |
| NM_013675                                              | Spnb1         | spectrin beta 1                                                                          | 12  | 77,681,475  | 77,811,534  | 65006                     | in gene                                   | 5.00     |
| NM_206534                                              | Churc1        | churchill domain containing 1                                                            | 12  | 77,866,560  | 77,884,167  | -80                       | upstream                                  | 5.00     |
| NM_134050                                              | Rab15         | RAB15, member RAS oncogene family                                                        | 12  | 77,898,949  | 77,923,503  | 1679                      | in gene                                   | 5.00     |
| NM_013738                                              | Plek2         | pleckstrin 2                                                                             | 12  | 79,989,681  | 80,007,937  | -4959                     | upstream                                  | 7.00     |
| XM_001477600                                           | LOC100041968  | hypothetical protein LOC100041968                                                        | 12  | 80,932,096  | 80,932,838  | 2358                      | downstream                                | 7.00     |
| NM_134156                                              | Actn1         | actinin, alpha 1                                                                         | 12  | 81,268,534  | 81,361,303  | -409                      | upstream                                  | 5.00     |
| NM_177267                                              | Wdr22         | WD repeat domain 22                                                                      | 12  | 81,437,669  | 81,537,526  | 94006, 58886              | in gene, in gene                          | 4.00     |
| NM_001079694, NM_001079695, NM_009159                  | Sfrs5         | splicing factor, arginine/serine-rich 5 (SRp40, HRS)                                     | 12  | 82,046,491  | 82,051,494  | -219                      | upstream                                  | 4.00     |
| NM_022316                                              | Smoc1         | SPARC related modular calcium binding 1                                                  | 12  | 82,127,818  | 82,287,387  | 110694                    | in gene                                   | 6.00     |
| NM_177395                                              | Map3k9        | mitogen-activated protein kinase kinase kinase 9                                         | 12  | 82,829,401  | 82,881,994  | 14746                     | in gene                                   | 5.00     |
| NM_015812                                              | Rgs6          | regulator of G-protein signaling 6                                                       | 12  | 83,718,025  | 84,259,799  | 135079, 147927            | in gene, in gene                          | 7.00     |
| NM_130887                                              | Papln         | papain, proteoglycan-like structure                                                      | 12  | 85,104,611  | 85,133,302  | 4765                      | in gene                                   | 5.00     |
| NM_172582                                              | Coq6          | coenzyme Q6 homolog (yeast)                                                              | 12  | 85,702,997  | 85,714,740  | 20795                     | downstream                                | 5.00     |
| NM_001026214, NM_007647                                | Entpd5        | ectonucleoside triphosphate diphosphohydrolase 5                                         | 12  | 85,714,807  | 85,749,979  | 26187                     | in gene                                   | 5.00     |
| NM_013589                                              | Ltp2          | latent transforming growth factor beta binding protein 2                                 | 12  | 86,124,162  | 86,217,445  | 68949                     | in gene                                   | 5.00     |
| NM_030225                                              | Dlst          | dihydroipoamide S-succinyltransferase (E2 component of 2-oxo-glutarate complex)          | 12  | 86,451,846  | 86,475,036  | 11882                     | in gene                                   | 5.00     |
| NM_145138                                              | Nek9          | NIMA (never in mitosis gene a)-related expressed kinase 9                                | 12  | 86,640,463  | 86,680,287  | 239                       | in gene                                   | 6.00     |
| NM_026775                                              | Tmed10        | transmembrane emp24-like trafficking protein 10 (yeast)                                  | 12  | 86,681,564  | 86,715,667  | 35619                     | downstream                                | 6.00     |
| NM_001081423                                           | Ttl5          | tubulin tyrosine ligase-like family, member 5                                            | 12  | 87,165,660  | 87,394,852  | 144908                    | in gene                                   | 4.00     |
| XM_892281, XM_906877                                   | EG627607      | predicted gene, EG627607                                                                 | 12  | 88,075,319  | 88,104,745  | 27737                     | in gene                                   | 7.00     |
| NM_145836                                              | 6430527G18Rik | RIKEN cDNA 6430527G18 gene                                                               | 12  | 88,221,651  | 88,225,761  | -63                       | upstream                                  | 8.00     |
| NM_001080943                                           | Zdhhc22       | zinc finger, DHHC-type containing 22                                                     | 12  | 88,324,331  | 88,329,626  | -5462                     | upstream                                  | 7.00     |
| NM_181815                                              | 4930534B04Rik | RIKEN cDNA 4930534B04 gene                                                               | 12  | 92,236,932  | 92,622,818  | 365506                    | in gene                                   | 7.00     |
| XM_980161, XM_991883                                   | LOC667688     | similar to 60S ribosomal protein L17 (L23) (Amino acid starvation-induced protein) (ASI) | 12  | 96,913,467  | 97,016,760  | 19813                     | in gene                                   | 6.00     |
| NM_201518                                              | Flrt2         | fibronectin leucine rich transmembrane protein 2                                         | 12  | 96,930,464  | 97,019,235  | 2816                      | in gene                                   | 6.00     |
| NM_011877                                              | Ptpn21        | protein tyrosine phosphatase, non-receptor type 21                                       | 12  | 99,914,952  | 99,972,804  | 36                        | in gene                                   | 7.00     |
| NM_183186                                              | Ches1         | checkpoint suppressor 1                                                                  | 12  | 100,433,304 | 100,688,284 | 136428, 56988             | in gene, in gene                          | 6.50     |
| XM_001473733                                           | LOC100039892  | hypothetical protein LOC100039892                                                        | 12  | 100,686,807 | 100,802,177 | -3311                     | upstream                                  | 6.00     |
| XM_484171, XM_912077                                   | BC002230      | cDNA sequence BC002230                                                                   | 12  | 101,363,662 | 101,397,863 | 15239                     | in gene                                   | 7.00     |
| NM_009790                                              | Calm1         | calmodulin 1                                                                             | 12  | 101,437,751 | 101,448,016 | -135                      | upstream                                  | 6.00     |
| XM_127105, XM_985528                                   | Ttc7b         | tetratricopeptide repeat domain 7B                                                       | 12  | 101,538,602 | 101,759,042 | 215922                    | in gene                                   | 4.00     |
| NM_011812                                              | Fbln5         | fibulin 5                                                                                | 12  | 102,984,775 | 103,065,261 | 14461                     | in gene                                   | 6.00     |
| NM_023049                                              | Asb2          | ankyrin repeat and SOCS box-containing protein 2                                         | 12  | 104,559,352 | 104,594,211 | 14723                     | in gene                                   | 6.00     |
| XM_001478583, XM_994648                                | EG668158      | predicted gene, EG668158                                                                 | 12  | 109,444,555 | 109,513,627 | 57227, 52091              | in gene, in gene                          | 5.00     |
| NM_001044380                                           | 1600002O04Rik | RIKEN cDNA 1600002O04 gene                                                               | 12  | 109,544,480 | 109,566,510 | 27936                     | downstream                                | 7.00     |
| NM_010010                                              | Cyp46a1       | cytochrome P450, family 46, subfamily a, polypeptide 1                                   | 12  | 109,572,591 | 109,600,444 | -175, 14385, 31217, 34465 | upstream, in gene, downstream, downstream | 7.00     |
| NM_001043335, NM_001043336                             | Eml1          | echinoderm microtubule associated protein like 1                                         | 12  | 109,648,865 | 109,777,774 | 33103, 136351             | in gene, downstream                       | 5.50     |
| NM_007965                                              | Evl           | Ena-vasodilator stimulated phosphoprotein                                                | 12  | 109,792,930 | 109,926,726 | -7714                     | upstream                                  | 6.00     |
| NM_011710                                              | Wars          | tryptophanyl-tRNA synthetase                                                             | 12  | 110,098,244 | 110,131,407 | 5239                      | in gene                                   | 5.00     |
| XM_001474974, XM_001476637                             | Wdr25         | WD repeat domain 25                                                                      | 12  | 110,132,513 | 110,266,663 | -6345                     | upstream                                  | 5.00     |
| NM_026048                                              | 2810452K22Rik | RIKEN cDNA 2810452K22 gene                                                               | 12  | 112,110,832 | 112,127,324 | -4772                     | upstream                                  | 5.00     |
| NM_001081057                                           | 4930573119Rik | RIKEN cDNA 4930573119 gene                                                               | 12  | 112,127,522 | 112,210,604 | 4574                      | in gene                                   | 5.00     |
| NM_183016                                              | Cdc42bbp      | Cdc42 binding protein kinase beta                                                        | 12  | 112,531,190 | 112,615,570 | 354                       | in gene                                   | 6.00     |
| NM_009652                                              | Akt1          | thymoma viral proto-oncogene 1                                                           | 12  | 113,892,032 | 113,912,401 | 4401                      | in gene                                   | 6.00     |



| Accession No.                            | Symbol        | Gene Title                                                             | Chr | Gene Start  | Gene End    | Interval Dists to Start         | Interval Pos                          | Avg Peak |
|------------------------------------------|---------------|------------------------------------------------------------------------|-----|-------------|-------------|---------------------------------|---------------------------------------|----------|
| XM_001477883,<br>XM_356600,<br>XM_914337 | EG382639      | predicted gene, EG382639                                               | 12  | 113,917,051 | 113,920,958 | -9051                           | upstream                              | 6.00     |
| XM_001475946                             | LOC100041194  | similar to KIAA2019 protein                                            | 12  | 114,014,007 | 114,046,697 | 6489                            | in gene                               | 5.00     |
| NM_145450                                | BC022687      | cDNA sequence BC022687                                                 | 12  | 114,047,186 | 114,054,456 | -6978                           | upstream                              | 5.00     |
| XM_001472404                             | Igh           | immunoglobulin heavy chain complex                                     | 12  | 114,496,979 | 117,248,165 | 2177813                         | in gene                               | 5.00     |
|                                          | Ighv5-15      | immunoglobulin heavy variable V5-15                                    | 12  | 115,064,857 | 115,065,152 | -5200                           | upstream                              | 5.00     |
|                                          | Ighv5-16      | immunoglobulin heavy variable V5-16                                    | 12  | 115,076,739 | 115,077,032 | 6680                            | downstream                            | 5.00     |
| NM_011215                                | Ptpn2         | protein tyrosine phosphatase, receptor type, N polypeptide 2           | 12  | 117,724,306 | 118,515,266 | 542142, 732014                  | in gene, in gene                      | 5.50     |
| NM_145131                                | Pitrm1        | pitrilysin metallopeptidase 1                                          | 13  | 6,547,403   | 6,579,404   | 28597                           | in gene                               | 5.00     |
| NM_019703                                | Pfkp          | phosphofructokinase, platelet                                          | 13  | 6,579,120   | 6,647,970   | 71970                           | downstream                            | 5.00     |
| NM_033268                                | Actn2         | actinin alpha 2                                                        | 13  | 12,361,693  | 12,432,999  | 61735                           | in gene                               | 8.00     |
| NM_138654                                | 5033411D12Rik | RIKEN cDNA 5033411D12 gene                                             | 13  | 16,949,306  | 17,786,573  | -819                            | upstream                              | 4.00     |
| NM_025479                                | 2810021B07Rik | RIKEN cDNA 2810021B07 gene                                             | 13  | 17,787,247  | 17,790,939  | 145                             | in gene                               | 4.00     |
| NM_175006                                | Pou6f2        | POU domain, class 6, transcription factor 2                            | 13  | 18,216,794  | 18,473,873  | 257617                          | downstream                            | 5.00     |
| NM_080288,<br>NM_198093                  | Elmo1         | engulfment and cell motility 1, ced-12 homolog (C. elegans)            | 13  | 20,277,294  | 20,698,394  | 69202                           | in gene                               | 6.00     |
| NM_178210                                | Hist1h4j      | histone cluster 1, H4j                                                 | 13  | 21,826,965  | 21,827,276  | -693                            | upstream                              | 5.00     |
| NM_178211                                | Hist1h4k      | histone cluster 1, H4k                                                 | 13  | 21,842,063  | 21,842,374  | -2058                           | upstream                              | 5.00     |
| NM_178183                                | Hist1h2ak     | histone cluster 1, H2ak                                                | 13  | 21,845,304  | 21,845,696  | 1264                            | downstream                            | 5.00     |
| NM_178201                                | Hist1h2bn     | histone cluster 1, H2bn                                                | 13  | 21,845,992  | 21,846,372  | -1560                           | upstream                              | 5.00     |
| NM_007717                                | Cmah          | cytidine monophospho-N-acetylneuraminic acid hydroxylase               | 13  | 24,506,991  | 24,562,880  | 64561                           | downstream                            | 5.00     |
| NM_001080381,<br>NM_029679,<br>NM_178658 | 6330500D04Rik | RIKEN cDNA 6330500D04 gene                                             | 13  | 24,706,479  | 24,825,675  | 24337                           | in gene                               | 6.00     |
| NM_144536                                | Cdkal1        | CDK5 regulatory subunit associated protein 1-like 1                    | 13  | 29,417,175  | 29,947,457  | 450081, 83681                   | in gene, in gene                      | 6.50     |
| NM_001013788                             | EG432743      | predicted gene, EG432743                                               | 13  | 31,066,033  | 31,068,117  | 12031                           | downstream                            | 6.00     |
| NM_146041                                | Gmgs          | GDP-mannose 4, 6-dehydratase                                           | 13  | 31,911,455  | 32,430,413  | 69357                           | in gene                               | 6.00     |
|                                          | 4930482L21Rik | RIKEN cDNA 4930482L21 gene                                             | 13  | 34,088,999  | 34,089,565  | -4675                           | upstream                              | 5.00     |
| NM_009068                                | Ripk1         | receptor (TNFRSF)-interacting serine-threonine kinase 1                | 13  | 34,094,743  | 34,127,039  | -503                            | upstream                              | 5.00     |
| XM_884663,<br>XM_910732                  | 2310047M15Rik | RIKEN cDNA 2310047M15 gene                                             | 13  | 34,254,833  | 34,270,041  | -6577                           | upstream                              | 5.00     |
| NM_013830                                | Prpf4b        | PRP4 pre-mRNA processing factor 4 homolog B (yeast)                    | 13  | 34,967,365  | 34,994,901  | 27                              | in gene                               | 5.00     |
| NM_145367                                | Txndc5        | thioredoxin domain containing 5                                        | 13  | 38,592,144  | 38,620,329  | 9                               | in gene                               | 5.00     |
| XM_001472442,<br>XM_001473940            | BC024659      | cDNA sequence BC024659                                                 | 13  | 41,345,213  | 41,371,946  | 499                             | in gene                               | 5.00     |
| NM_025935                                | Tbc1d7        | TBC1 domain family, member 7                                           | 13  | 43,247,113  | 43,266,728  | 29469, -56                      | downstream,<br>upstream               | 7.00     |
| NM_021878                                | Jarid2        | jumonji, AT rich interactive domain 2                                  | 13  | 44,826,272  | 45,016,350  | 108997                          | in gene                               | 4.00     |
| XM_001473014                             | LOC100039502  | hypothetical protein LOC100039502                                      | 13  | 45,185,233  | 45,254,612  | 75396                           | downstream                            | 5.00     |
| NM_025508                                | Gmpr          | guanosine monophosphate reductase                                      | 13  | 45,602,838  | 45,641,750  | 15914                           | in gene                               | 7.00     |
| NM_009124                                | Atxn1         | ataxin 1                                                               | 13  | 45,650,262  | 46,060,345  | 382478, 215129, 178041,<br>1097 | in gene, in gene, in<br>gene, in gene | 5.25     |
| XM_001473131,<br>XM_001474547            | 5033430I15Rik | RIKEN cDNA 5033430I15 gene                                             | 13  | 46,060,622  | 46,061,876  | -1374                           | upstream                              | 5.00     |
| NM_025900                                | Dek           | DEK oncogene (DNA binding)                                             | 13  | 47,180,154  | 47,201,479  | 71                              | in gene                               | 7.00     |
| NM_146042                                | Ibrdc2        | IBR domain containing 2                                                | 13  | 47,218,089  | 47,341,845  | 120407                          | in gene                               | 6.00     |
| NM_031166                                | Id4           | inhibitor of DNA binding 4                                             | 13  | 48,356,796  | 48,359,405  | -348                            | upstream                              | 5.00     |
| NM_029361                                | Wnk2          | WNK lysine deficient protein kinase 2                                  | 13  | 49,131,679  | 49,243,383  | 29895, 15351                    | in gene, in gene                      | 4.50     |
| NM_013601                                | Msx2          | homeo box, msh-like 2                                                  | 13  | 53,562,250  | 53,568,149  | 5333                            | in gene                               | 6.00     |
| NM_028597                                | Thoc3         | THO complex 3                                                          | 13  | 54,560,879  | 54,570,180  | 436                             | in gene                               | 6.00     |
| NM_008011                                | Fgfr4         | fibroblast growth factor receptor 4                                    | 13  | 55,254,179  | 55,270,120  | 18861                           | downstream                            | 6.00     |
| NM_145382                                | BC021381      | cDNA sequence BC021381                                                 | 13  | 55,640,680  | 55,672,481  | 8801                            | in gene                               | 5.00     |
| NM_181278                                | B230219D22Rik | RIKEN cDNA B230219D22 gene                                             | 13  | 55,794,485  | 55,804,861  | 14779                           | downstream                            | 5.00     |
| NM_175150                                | 2310047H23Rik | RIKEN cDNA 2310047H23 gene                                             | 13  | 55,816,011  | 55,827,588  | -6747                           | upstream                              | 5.00     |
| NM_019568                                | Cxcl14        | chemokine (C-X-C motif) ligand 14                                      | 13  | 56,390,004  | 56,397,912  | 8872                            | downstream                            | 6.00     |
| NM_009369                                | Tgfb1         | transforming growth factor, beta induced                               | 13  | 56,710,964  | 56,740,700  | -9236, 22956                    | upstream, in gene                     | 7.50     |
| NM_019832                                | Gkap1         | G kinase anchoring protein 1                                           | 13  | 58,334,712  | 58,375,549  | -611                            | upstream                              | 5.00     |
| NM_030153                                | Mak10         | MAK10 homolog, amino-acid N-acetyltransferase subunit, (S. cerevisiae) | 13  | 59,686,772  | 59,736,159  | -244                            | upstream                              | 7.00     |
| NM_177711                                | 4932411G14Rik | RIKEN cDNA 4932411G14 gene                                             | 13  | 59,827,286  | 59,833,113  | -10055                          | upstream                              | 7.00     |
| NM_025547                                | Mterfd1       | MTERF domain containing 1                                              | 13  | 67,013,062  | 67,034,003  | 211                             | in gene                               | 7.00     |
| NM_008959                                | Ptdss1        | phosphatidyserine synthase 1                                           | 13  | 67,033,766  | 67,099,337  | 26                              | in gene                               | 7.00     |
| NM_198600                                | Pols          | polymerase (DNA directed) sigma                                        | 13  | 69,636,837  | 69,672,717  | -1059                           | upstream                              | 8.00     |
| XR_035386                                | A530095I07Rik | RIKEN cDNA A530095I07 gene                                             | 13  | 69,681,924  | 69,682,901  | 9125                            | downstream                            | 8.00     |
| XM_127466,<br>XM_906878                  | 3110006E14Rik | RIKEN cDNA 3110006E14 gene                                             | 13  | 69,841,712  | 69,900,877  | 22173                           | in gene                               | 5.00     |
| NM_146047                                | Clptm1l       | CLPTM1-like                                                            | 13  | 73,741,749  | 73,758,053  | -309                            | upstream                              | 6.00     |
| NM_028186                                | Nkd2          | naked cuticle 2 homolog (Drosophila)                                   | 13  | 73,957,581  | 73,985,060  | 2660                            | in gene                               | 6.00     |
| NM_182839                                | 2900041A09Rik | RIKEN cDNA 2900041A09 gene                                             | 13  | 74,146,926  | 74,173,201  | 34994                           | downstream                            | 6.00     |
| NM_028959                                | Cep72         | centrosomal protein 72                                                 | 13  | 74,175,283  | 74,199,722  | 17802                           | in gene                               | 6.00     |
| NM_009644                                | Ahrr          | aryl-hydrocarbon receptor repressor                                    | 13  | 74,348,566  | 74,429,757  | 46557                           | in gene                               | 8.00     |
| NM_029847                                | Arsk          | arylsulfatase K                                                        | 13  | 76,198,330  | 76,236,059  | -21                             | upstream                              | 5.00     |
| NM_001081352                             | AK129128      | cDNA sequence AK129128                                                 | 13  | 76,236,182  | 76,325,431  | -102                            | upstream                              | 5.00     |
| NM_133905                                | Papd4         | PAP associated domain containing 4                                     | 13  | 93,917,355  | 93,962,238  | -178                            | upstream                              | 6.00     |

| Accession No.              | Symbol        | Gene Title                                                                            | Chr | Gene Start  | Gene End    | Interval Dists to Start | Interval Pos      | Avg Peak |
|----------------------------|---------------|---------------------------------------------------------------------------------------|-----|-------------|-------------|-------------------------|-------------------|----------|
| NM_021310                  | Jmy           | junction-mediating and regulatory protein                                             | 13  | 94,204,157  | 94,269,644  | 172                     | in gene           | 7.00     |
| NM_009680                  | Ap3b1         | adaptor-related protein complex 3, beta 1 subunit                                     | 13  | 95,128,986  | 95,336,270  | 49270                   | in gene           | 6.00     |
| NM_007974                  | F2r1          | coagulation factor II (thrombin) receptor-like 1                                      | 13  | 96,281,687  | 96,304,221  | -4371                   | upstream          | 4.00     |
| NM_010422                  | Hexb          | hexosaminidase B                                                                      | 13  | 97,946,362  | 97,968,225  | 7729                    | in gene           | 7.00     |
| NM_012026                  | Rgncf         | Rho-guanine nucleotide exchange factor                                                | 13  | 98,668,550  | 98,976,120  | 190104                  | in gene           | 6.00     |
| NM_023472                  | Ankra2        | ankyrin repeat, family A (RFXANK-like), 2                                             | 13  | 99,033,197  | 99,043,868  | 67                      | in gene           | 4.00     |
| NM_001025606               | Tmem171       | transmembrane protein 171                                                             | 13  | 99,456,193  | 99,464,786  | 13010                   | downstream        | 5.00     |
| NM_008634                  | Mtap1b        | microtubule-associated protein 1 B                                                    | 13  | 100,194,396 | 100,286,495 | 4991                    | in gene           | 6.00     |
| XM_001476235               | LOC100040968  | similar to CG33003-PA                                                                 | 13  | 109,906,430 | 110,125,257 | 145474, 214898          | in gene, in gene  | 4.50     |
| NM_008046                  | Fst           | folliculin                                                                            | 13  | 115,242,470 | 115,248,938 | 618                     | in gene           | 5.00     |
| NM_025341                  | Abhd6         | abhydrolase domain containing 6                                                       | 14  | 8,835,416   | 8,889,069   | 26472, 51400            | in gene, in gene  | 6.00     |
| NM_010210                  | Fhit          | fragile histidine triad gene                                                          | 14  | 10,382,608  | 11,994,546  | 380050                  | in gene           | 6.00     |
| NM_001033270               | Slc4a7        | solute carrier family 4, sodium bicarbonate cotransporter, member 7                   | 14  | 15,535,539  | 15,632,457  | 13997                   | in gene           | 7.00     |
| NM_025586                  | Rpl15         | ribosomal protein L15                                                                 | 14  | 19,100,337  | 19,103,500  | -196                    | upstream          | 5.00     |
| NM_023526                  | Nkiras1       | NFKB inhibitor interacting Ras-like protein 1                                         | 14  | 19,103,656  | 19,116,517  | 40                      | in gene           | 5.00     |
| NM_144839                  | Ube2e2        | ubiquitin-conjugating enzyme E2E 2 (UBC4/5 homolog, yeast)                            | 14  | 19,406,091  | 19,726,141  | 249245                  | in gene           | 5.00     |
| NM_001038637,<br>NM_010315 | Gng2          | guanine nucleotide binding protein (G protein), gamma 2 subunit                       | 14  | 20,691,781  | 20,796,471  | 15383                   | in gene           | 5.00     |
| NM_018829                  | Ap3m1         | adaptor-related protein complex 3, mu 1 subunit                                       | 14  | 21,854,032  | 21,871,407  | 399                     | in gene           | 5.00     |
| NM_134079                  | Adk           | adenosine kinase                                                                      | 14  | 21,871,855  | 22,267,769  | -847                    | upstream          | 5.00     |
| NM_145459                  | Zfp503        | zinc finger protein 503                                                               | 14  | 22,803,184  | 22,808,823  | 1655, -761              | in gene, upstream | 6.00     |
| NM_010610                  | Kcnma1        | potassium large conductance calcium-activated channel, subfamily M, alpha member 1    | 14  | 24,117,983  | 24,823,427  | 168387                  | in gene           | 8.00     |
| XM_908180,<br>XM_975187    | 2310047A01Rik | RIKEN cDNA 2310047A01 gene                                                            | 14  | 26,531,126  | 26,588,342  | 43606, 31494            | in gene, in gene  | 6.00     |
| XM_354798                  | 4933413J09Rik | RIKEN cDNA 4933413J09 gene                                                            | 14  | 27,177,039  | 27,219,942  | 34033                   | in gene           | 5.00     |
| NM_134437                  | Il17rd        | interleukin 17 receptor D                                                             | 14  | 27,852,187  | 27,920,472  | 19077                   | in gene           | 6.00     |
| NM_027871                  | Arhgef3       | Rho guanine nucleotide exchange factor (GEF) 3                                        | 14  | 28,051,225  | 28,217,090  | -7385, 162311           | upstream, in gene | 7.50     |
| NM_019979                  | Selk          | selenoprotein K                                                                       | 14  | 30,781,566  | 30,788,260  | 450                     | in gene           | 6.00     |
| NM_027493                  | Actr8         | ARP8 actin-related protein 8 homolog (S. cerevisiae)                                  | 14  | 30,791,572  | 30,806,399  | -9556                   | upstream          | 6.00     |
| NM_001081221               | Erc6          | excision repair cross-complementing rodent repair deficiency, complementation group 6 | 14  | 33,326,707  | 33,394,175  | 57869                   | in gene           | 6.00     |
| XM_358452,<br>XM_922412    | 1810011H11Rik | RIKEN cDNA 1810011H11 gene                                                            | 14  | 33,599,149  | 33,631,154  | 15475                   | in gene           | 4.00     |
| NM_130878                  | Pcdh21        | protocadherin 21                                                                      | 14  | 37,891,035  | 37,911,497  | 7305                    | in gene           | 4.00     |
| XM_354808,<br>XM_986046    | 6330416L11Rik | RIKEN cDNA 6330416L11 gene                                                            | 14  | 45,885,001  | 45,898,928  | 12807                   | in gene           | 5.00     |
| NM_015774                  | Ero1l         | ERO1-like (S. cerevisiae)                                                             | 14  | 45,903,996  | 45,938,202  | 40394                   | downstream        | 5.00     |
| NM_146054                  | Plekhc1       | pleckstrin homology domain containing, family C (with FERM domain) member 1           | 14  | 46,078,467  | 46,149,740  | 60716                   | in gene           | 4.00     |
| XM_001476890               | LOC100041724  | hypothetical protein LOC100041724                                                     | 14  | 46,999,142  | 47,003,283  | 7450                    | downstream        | 8.00     |
| NM_007554                  | Bmp4          | bone morphogenetic protein 4                                                          | 14  | 47,003,195  | 47,010,274  | 3682                    | in gene           | 8.00     |
| XM_001476910               | LOC100041732  | hypothetical protein LOC100041732                                                     | 14  | 47,005,954  | 47,008,957  | 638                     | in gene           | 8.00     |
| NM_001037221,<br>NM_028966 | Samd4         | sterile alpha motif domain containing 4                                               | 14  | 47,502,642  | 47,721,877  | 43230                   | in gene           | 5.00     |
| NM_172599                  | D14Ert436e    | DNA segment, Chr 14, ERATO Doi 436, expressed                                         | 14  | 48,160,569  | 48,188,089  | 8937                    | in gene           | 6.00     |
| XM_890298,<br>XM_906000    | EG625730      | predicted gene, EG625730                                                              | 14  | 48,188,898  | 48,189,452  | -9746                   | upstream          | 6.00     |
| NM_033602                  | Peli2         | pellino 2                                                                             | 14  | 48,740,544  | 48,880,558  | 50752                   | in gene           | 4.00     |
| NM_172600                  | 6720456H20Rik | RIKEN cDNA 6720456H20 gene                                                            | 14  | 49,066,251  | 49,134,805  | -171                    | upstream          | 6.00     |
| NM_001081430               | Nat12         | N-acetyltransferase 12                                                                | 14  | 49,791,902  | 49,810,706  | -190                    | upstream          | 6.00     |
| NM_001001808               | Olfir221      | olfactory receptor 221                                                                | 14  | 52,654,849  | 52,655,784  | -6232                   | upstream          | 5.00     |
| NM_013768                  | Prmt5         | protein arginine N-methyltransferase 5                                                | 14  | 55,126,296  | 55,136,252  | 12                      | in gene           | 7.00     |
| NM_011186                  | Psmb5         | proteasome (prosome, macropain) subunit, beta type 5                                  | 14  | 55,232,957  | 55,236,832  | -176                    | upstream          | 4.00     |
| NM_175204                  | Mirn686       | microRNA 686                                                                          | 14  | 55,235,513  | 55,235,621  | -1387                   | upstream          | 4.00     |
| NM_001003829,<br>NM_177049 | Jph4          | junctionophilin 4                                                                     | 14  | 55,725,663  | 55,735,115  | 7894                    | in gene           | 5.00     |
| NM_024267                  | Ipo4          | importin 4                                                                            | 14  | 56,244,466  | 56,254,515  | 19                      | in gene           | 5.00     |
| NM_028780                  | Tm9sf1        | transmembrane 9 superfamily member 1                                                  | 14  | 56,254,803  | 56,262,643  | 8147                    | downstream        | 5.00     |
| XM_001476299,<br>XM_147850 | BC030046      | cDNA sequence BC030046                                                                | 14  | 56,472,853  | 56,493,578  | 555                     | in gene           | 5.00     |
| NM_030004                  | Cryl1         | crystallin, lambda 1                                                                  | 14  | 57,893,871  | 58,017,320  | 184                     | in gene           | 4.00     |
| NM_145463                  | Tmem46        | transmembrane protein 46                                                              | 14  | 60,244,145  | 60,250,492  | -1553                   | upstream          | 6.00     |
| NM_170591                  | Nupl1         | nucleoporin like 1                                                                    | 14  | 60,838,305  | 60,870,215  | -137                    | upstream          | 6.00     |
| NM_144843                  | Mtmr6         | myotubularin related protein 6                                                        | 14  | 60,884,065  | 60,921,207  | 35551                   | in gene           | 7.00     |
| NM_013869                  | Tnfrsf19      | tumor necrosis factor receptor superfamily, member 19                                 | 14  | 61,582,873  | 61,665,306  | 50175, 33946            | in gene, in gene  | 5.50     |
| NM_008715                  | Ints6         | integrator complex subunit 6                                                          | 14  | 63,295,162  | 63,379,949  | -291                    | upstream          | 6.00     |
| NM_007549                  | Blk           | B lymphoid kinase                                                                     | 14  | 63,991,674  | 64,036,024  | 47832                   | downstream        | 5.00     |

| Accession No.              | Symbol        | Gene Title                                                       | Chr | Gene Start  | Gene End    | Interval Dists to Start | Interval Pos        | Avg Peak |
|----------------------------|---------------|------------------------------------------------------------------|-----|-------------|-------------|-------------------------|---------------------|----------|
| NM_153414                  | D14ErtD231e   | DNA segment, Chr 14, ERATO Doi 231, expressed                    | 14  | 65,568,882  | 65,658,663  | 48334                   | in gene             | 5.00     |
| NM_009955                  | Dpysl2        | dihydropyrimidinase-like 2                                       | 14  | 67,421,701  | 67,487,437  | -435                    | upstream            | 7.00     |
| NM_001034881               | EG432870      | predicted gene, EG432870                                         | 14  | 67,487,687  | 67,489,842  | 185                     | in gene             | 7.00     |
| NM_020275                  | Tnfrsf10b     | tumor necrosis factor receptor superfamily, member 10b           | 14  | 70,167,336  | 70,184,218  | 13912                   | in gene             | 6.00     |
| NM_153514                  | Rhobtb2       | Rho-related BTB domain containing 2                              | 14  | 70,184,799  | 70,205,277  | 24029                   | downstream          | 6.00     |
| NM_198642                  | 5031414D18Rik | RIKEN cDNA 5031414D18 gene                                       | 14  | 75,402,640  | 75,452,224  | 56128                   | downstream          | 5.00     |
| XM_001479710               | LOC100043189  | hypothetical protein LOC100043189                                | 14  | 76,243,727  | 76,244,969  | 265, -663               | in gene, upstream   | 5.00     |
| XM_001471928               | LOC100038852  | hypothetical protein LOC100038852                                | 14  | 76,245,138  | 76,248,105  | 3401, 2473              | downstream, in gene | 5.00     |
| NM_009429                  | Tpt1          | tumor protein, translationally-controlled 1                      | 14  | 76,245,138  | 76,248,105  | -434, 494               | upstream, in gene   | 5.00     |
| XM_894566, XM_987594       | 2810032E02Rik | RIKEN cDNA 2810032E02 gene                                       | 14  | 76,932,619  | 76,956,696  | 184                     | in gene             | 6.00     |
| NM_172488                  | 9030625A04Rik | RIKEN cDNA 9030625A04 gene                                       | 14  | 77,424,008  | 77,436,424  | 72                      | in gene             | 5.00     |
| NM_175369                  | Ccdc122       | coiled-coil domain containing 122                                | 14  | 77,436,579  | 77,512,011  | -227                    | upstream            | 5.00     |
| NM_172813                  | D230005D02Rik | RIKEN cDNA D230005D02 gene                                       | 14  | 77,556,623  | 78,121,214  | 25185                   | in gene             | 5.00     |
| NM_001081336               | Dgkh          | diacylglycerol kinase, eta                                       | 14  | 78,969,416  | 79,124,896  | 93648                   | in gene             | 4.00     |
| NM_025427                  | 1190002H23Rik | RIKEN cDNA 1190002H23 gene                                       | 14  | 79,688,557  | 79,701,442  | 130                     | in gene             | 5.00     |
| NM_018765                  | Wbp4          | WW domain binding protein 4                                      | 14  | 79,859,744  | 79,881,075  | 163                     | in gene             | 8.00     |
| NM_007920                  | Elf1          | E74-like factor 1                                                | 14  | 79,881,001  | 79,982,283  | -89                     | upstream            | 8.00     |
| NM_001013753               | Pcdh17        | protocadherin 17                                                 | 14  | 84,845,481  | 84,934,008  | -1337                   | upstream            | 6.00     |
| NM_016723                  | Uchl3         | ubiquitin carboxyl-terminal esterase L3 (ubiquitin thioesterase) | 14  | 102,053,184 | 102,095,342 | 78                      | in gene             | 4.00     |
| XM_001472577, XM_001480973 | Lmo7          | LIM domain only 7                                                | 14  | 102,129,129 | 102,333,927 | 140791                  | in gene             | 5.00     |
| NM_177715                  | Kctd12        | potassium channel tetramerisation domain containing 12           | 14  | 103,375,798 | 103,381,854 | 30                      | in gene             | 8.00     |
| NM_015822                  | Fbx3          | F-box and leucine-rich repeat protein 3                          | 14  | 103,479,456 | 103,498,726 | -234                    | upstream            | 6.00     |
| NM_026047                  | 2610206B13Rik | RIKEN cDNA 2610206B13 gene                                       | 14  | 104,876,751 | 104,921,883 | -5                      | upstream            | 7.00     |
| NM_011897                  | Spry2         | sprouty homolog 2 (Drosophila)                                   | 14  | 106,291,732 | 106,296,036 | -604                    | upstream            | 6.00     |
| NM_001033336               | Abcc4         | ATP-binding cassette, sub-family C (CFTR/MRP), member 4          | 14  | 118,881,914 | 119,105,427 | 11635                   | in gene             | 7.00     |
| NM_008929                  | Dnajc3a       | DnaJ (Hsp40) homolog, subfamily C, member 3A                     | 14  | 119,337,209 | 119,379,121 | 15159                   | in gene             | 7.00     |
| NM_015820                  | Hs6st3        | heparan sulfate 6-O-sulfotransferase 3                           | 14  | 119,537,524 | 120,269,037 | 201708                  | in gene             | 5.00     |
| NM_175341, NM_207515       | Mbnl2         | muscleblind-like 2                                               | 14  | 120,674,891 | 120,830,920 | 52373, 129693           | in gene, in gene    | 5.00     |
| NM_029556                  | Clybl         | citrate lyase beta like                                          | 14  | 122,580,943 | 122,801,450 | 81180                   | in gene             | 4.00     |
| NM_010201, NM_207667       | Fgf14         | fibroblast growth factor 14                                      | 14  | 124,377,129 | 125,076,349 | 389885                  | in gene             | 5.00     |
| NM_029341                  | Capsl         | calcyphosine-like                                                | 15  | 9,365,783   | 9,395,790   | 30841                   | downstream          | 6.00     |
| NM_030888                  | C1qtnf3       | C1q and tumor necrosis factor related protein 3                  | 15  | 10,882,111  | 10,909,905  | 29489                   | downstream          | 7.00     |
| NM_008537                  | Amacr         | alpha-methylacyl-CoA racemase                                    | 15  | 10,911,511  | 10,926,379  | 89                      | in gene             | 7.00     |
| NM_025673                  | Golph3        | golgi phosphoprotein 3                                           | 15  | 12,251,251  | 12,281,022  | 1581                    | in gene             | 9.00     |
| NM_001008420               | Cdh12         | cadherin 12                                                      | 15  | 21,041,207  | 21,519,288  | 250985                  | in gene             | 7.00     |
| NM_019472                  | Myo10         | myosin X                                                         | 15  | 25,552,305  | 25,743,426  | 55583, 161823           | in gene, in gene    | 5.00     |
| NM_020332                  | Ank           | progressive ankylosis                                            | 15  | 27,396,432  | 27,524,660  | 123472                  | in gene             | 7.00     |
| NM_146057                  | Dap           | death-associated protein                                         | 15  | 31,154,180  | 31,204,090  | 28, 23708               | in gene, in gene    | 5.00     |
| NM_176073                  | Pgcp          | plasma glutamate carboxypeptidase                                | 15  | 33,012,953  | 33,524,258  | 359                     | in gene             | 5.00     |
| NM_016762                  | Matn2         | matrilin 2                                                       | 15  | 34,236,436  | 34,365,997  | 193                     | in gene             | 5.00     |
| NM_054049                  | Osr2          | odd-skipped related 2 (Drosophila)                               | 15  | 35,225,867  | 35,233,060  | -107                    | upstream            | 8.00     |
| XM_981774, XM_986525       | Vps13b        | vacuolar protein sorting 13B (yeast)                             | 15  | 35,301,301  | 35,860,984  | 401963, 403451          | in gene, in gene    | 5.50     |
| NM_175134                  | Ankrd46       | ankyrin repeat domain 46                                         | 15  | 36,407,423  | 36,426,506  | 26                      | in gene             | 7.00     |
| NM_025712                  | 4631426E05Rik | RIKEN cDNA 4631426E05 gene                                       | 15  | 36,433,817  | 36,485,327  | 58847                   | downstream          | 7.00     |
| NM_080640                  | Baalc         | brain and acute leukemia, cytoplasmic                            | 15  | 38,765,455  | 38,782,810  | 4769                    | in gene             | 5.00     |
| NM_026149                  | Nudcd1        | NudC domain containing 1                                         | 15  | 44,206,777  | 44,259,434  | -182                    | upstream            | 6.00     |
| NM_175009                  | Eny2          | enhancer of yellow 2 homolog (Drosophila)                        | 15  | 44,259,657  | 44,269,231  | -41                     | upstream            | 6.00     |
| NM_134092                  | Mtbp          | Mdm2, transformed 3T3 cell double minute p53 binding protein     | 15  | 55,388,963  | 55,457,978  | 32765                   | in gene             | 5.00     |
| NM_172378                  | BC026439      | cDNA sequence BC026439                                           | 15  | 57,075,326  | 57,309,180  | 218492                  | in gene             | 7.00     |
| NM_199449                  | Zhx2          | zinc fingers and homeoboxes protein 2                            | 15  | 57,526,222  | 57,671,387  | 78162, 132733           | in gene, in gene    | 4.50     |
| NM_175226                  | Rnf139        | ring finger protein 139                                          | 15  | 58,720,853  | 58,732,409  | 14230                   | downstream          | 4.00     |
| NM_175151                  | Tatdn1        | TatD DNase domain containing 1                                   | 15  | 58,721,708  | 58,765,285  | 30202                   | in gene             | 4.00     |
| NM_144800                  | Mtss1         | metastasis suppressor 1                                          | 15  | 58,774,802  | 58,913,544  | 129544                  | in gene             | 6.00     |
| NR_003368                  | Pvt1          | plasmacytoma variant translocation 1                             | 15  | 61,869,542  | 62,082,530  | 20522, 174506           | in gene, in gene    | 5.00     |
| XM_001475406               | LOC100040584  | hypothetical protein LOC100040584                                | 15  | 62,042,972  | 62,044,802  | 754                     | in gene             | 5.00     |
| NM_009623                  | Adcy8         | adenylate cyclase 8                                              | 15  | 64,530,597  | 64,753,858  | 130642                  | in gene             | 6.00     |
| NM_009177                  | St3gal1       | ST3 beta-galactoside alpha-2,3-sialyltransferase 1               | 15  | 66,934,437  | 67,008,444  | 252                     | in gene             | 7.00     |
| XM_907370, XM_981889       | Col22a1       | collagen, type XXII, alpha 1                                     | 15  | 71,628,906  | 71,864,639  | 239                     | in gene             | 5.00     |
| NM_001033219               | Slc45a4       | solute carrier family 45, member 4                               | 15  | 73,411,987  | 73,455,174  | 1350                    | in gene             | 5.00     |
| XM_128161, XM_909411       | 1700016M24Rik | RIKEN cDNA 1700016M24 gene                                       | 15  | 74,436,458  | 74,466,748  | 19164                   | in gene             | 6.00     |
| NM_008415                  | Jrk           | jerky                                                            | 15  | 74,532,842  | 74,539,727  | -1841                   | upstream            | 5.00     |
| XR_035258, XR_035306       | 4933427E11Rik | RIKEN cDNA 4933427E11 gene                                       | 15  | 74,539,591  | 74,540,804  | 1977                    | downstream          | 5.00     |
| NM_028216                  | Psca          | prostate stem cell antigen                                       | 15  | 74,545,269  | 74,547,499  | -3701                   | upstream            | 5.00     |

| Accession No.                                                | Symbol        | Gene Title                                                                                             | Chr | Gene Start | Gene End   | Interval Dists to Start    | Interval Pos              | Avg Peak |
|--------------------------------------------------------------|---------------|--------------------------------------------------------------------------------------------------------|-----|------------|------------|----------------------------|---------------------------|----------|
| NM_198607                                                    | 4930572J05Rik | RIKEN cDNA 4930572J05 gene                                                                             | 15  | 74,551,664 | 74,554,803 | -10096                     | upstream                  | 5.00     |
| NM_026730                                                    | Gphbp1        | GPI-anchored HDL-binding protein 1                                                                     | 15  | 75,427,088 | 75,428,643 | 2245                       | downstream                | 5.00     |
| XM_001475872,<br>XM_001481291                                | 2810039B14Rik | RIKEN cDNA 2810039B14 gene                                                                             | 15  | 75,450,171 | 75,477,866 | 22405                      | in gene                   | 7.00     |
| NM_008164                                                    | Rhpn1         | rhophilin, Rho GTPase binding protein 1                                                                | 15  | 75,534,824 | 75,544,655 | 9416                       | in gene                   | 7.00     |
| NM_177922                                                    | Mapk15        | mitogen-activated protein kinase 15                                                                    | 15  | 75,824,199 | 75,829,583 | 345                        | in gene                   | 5.00     |
| NM_134087                                                    | AA409316      | expressed sequence AA409316                                                                            | 15  | 75,831,533 | 75,844,766 | 20222                      | downstream                | 5.00     |
| XM_001476072                                                 | LOC100041269  | similar to sphingomyelin phosphodiesterase 3, neutral membrane                                         | 15  | 76,124,697 | 76,126,431 | 10039                      | downstream                | 5.00     |
| NM_153122                                                    | Oplah         | 5-oxoprolinase (ATP-hydrolysing)                                                                       | 15  | 76,127,033 | 76,137,675 | 2939                       | in gene                   | 5.00     |
| NM_058214                                                    | Recq14        | RecQ protein-like 4                                                                                    | 15  | 76,534,171 | 76,540,906 | -4310                      | upstream                  | 6.00     |
| NM_145916                                                    | Zfp7          | zinc finger protein 7                                                                                  | 15  | 76,709,689 | 76,722,825 | 20615                      | downstream                | 7.00     |
| NM_025536                                                    | Comm5         | COMM domain containing 5                                                                               | 15  | 76,730,371 | 76,731,727 | -67                        | upstream                  | 7.00     |
| NM_012053                                                    | Rpl8          | ribosomal protein L8                                                                                   | 15  | 76,734,529 | 76,736,744 | -4225                      | upstream                  | 7.00     |
| XM_001478851                                                 | LOC100042318  | similar to thymosin, beta 10                                                                           | 15  | 77,200,578 | 77,200,712 | 3336                       | downstream                | 5.00     |
| NM_013645                                                    | Pvalb         | parvalbumin                                                                                            | 15  | 78,021,547 | 78,036,781 | 19469                      | downstream                | 6.00     |
| NM_008595                                                    | Mfng          | manic fringe homolog (Drosophila)                                                                      | 15  | 78,586,313 | 78,603,875 | -2301                      | upstream                  | 6.00     |
| NM_001024716,<br>NM_001039155,<br>NM_001039156,<br>NM_138579 | Triobp        | TRIO and F-actin binding protein                                                                       | 15  | 78,778,154 | 78,836,299 | 34806                      | in gene                   | 7.00     |
| NM_008197                                                    | H1f0          | H1 histone family, member 0                                                                            | 15  | 78,858,642 | 78,860,934 | -4370                      | upstream                  | 7.00     |
| NM_013847                                                    | Gcat          | glycine C-acetyltransferase (2-amino-3-ketobutyrate-coenzyme A ligase)                                 | 15  | 78,861,350 | 78,868,784 | -7078                      | upstream                  | 7.00     |
| NM_016915                                                    | Pla2g6        | phospholipase A2, group VI                                                                             | 15  | 79,116,658 | 79,158,598 | 2022                       | in gene                   | 5.00     |
| NM_010755                                                    | Maff          | v-maf musculoaponeurotic fibrosarcoma oncogene family, protein F (avian)                               | 15  | 79,178,108 | 79,189,506 | 260                        | in gene                   | 5.00     |
| NM_013767                                                    | Csnk1e        | casein kinase 1, epsilon                                                                               | 15  | 79,248,286 | 79,272,437 | 1013                       | in gene                   | 5.00     |
| NM_001040187,<br>NM_152806,<br>NM_199079,<br>NM_199080       | Ddx17         | DEAD (Asp-Glu-Ala-Asp) box polypeptide 17                                                              | 15  | 79,358,126 | 79,377,171 | 67                         | in gene                   | 5.00     |
| NM_030689                                                    | Nptxr         | neuronal pentraxin receptor                                                                            | 15  | 79,616,781 | 79,635,139 | 8995                       | in gene                   | 5.00     |
| NM_030255                                                    | Apobec3       | apolipoprotein B editing complex 3                                                                     | 15  | 79,722,888 | 79,738,516 | -9032                      | upstream                  | 10.00    |
| NM_009303,<br>NM_207708                                      | Syng1         | synaptogyrin 1                                                                                         | 15  | 79,921,764 | 79,949,931 | 25516                      | in gene                   | 6.00     |
| NM_178719                                                    | Smcr7l        | Smith-Magenis syndrome chromosome region, candidate 7-like (human)                                     | 15  | 80,064,550 | 80,083,154 | 20762                      | downstream                | 7.00     |
| NM_009716                                                    | Atf4          | activating transcription factor 4                                                                      | 15  | 80,085,614 | 80,087,971 | -302                       | upstream                  | 7.00     |
| NM_175109                                                    | Rps19bp1      | ribosomal protein S19 binding protein 1                                                                | 15  | 80,091,044 | 80,094,736 | 9424                       | downstream                | 7.00     |
| NM_017376,<br>NM_153484                                      | Tef           | thyrotroph embryonic factor                                                                            | 15  | 81,633,247 | 81,657,293 | 8673                       | in gene                   | 8.00     |
| XM_001474248,<br>XM_001479829                                | Xrcc6         | X-ray repair complementing defective repair in Chinese hamster cells 6                                 | 15  | 81,846,799 | 81,870,521 | 30041                      | downstream                | 4.00     |
| NM_011482                                                    | Nhp21l        | NHP2 non-histone chromosome protein 2-like 1 (S. cerevisiae)                                           | 15  | 81,871,775 | 81,878,028 | 1188                       | in gene                   | 4.00     |
| NM_022723                                                    | Scube1        | signal peptide, CUB domain, EGF-like 1                                                                 | 15  | 83,433,013 | 83,555,451 | 85611, 73179, 58267, 38075 | in gene, in gene, in gene | 7.50     |
| NM_029946                                                    | 4931407K02Rik | RIKEN cDNA 4931407K02 gene                                                                             | 15  | 83,697,142 | 83,895,779 | 67683                      | in gene                   | 6.00     |
| NM_013873                                                    | Sult4a1       | sulfotransferase family 4A, member 1                                                                   | 15  | 83,906,527 | 83,936,184 | 16040                      | in gene                   | 5.00     |
| XM_128169,<br>XM_901935                                      | 1810041L15Rik | RIKEN cDNA 1810041L15 gene                                                                             | 15  | 84,209,633 | 84,277,527 | 36791                      | in gene                   | 5.00     |
| NM_146061                                                    | Arhgap8       | Rho GTPase activating protein 8                                                                        | 15  | 84,511,428 | 84,534,103 | -4324                      | upstream                  | 7.00     |
| NM_028455                                                    | 3110043J09Rik | RIKEN cDNA 3110043J09 gene                                                                             | 15  | 84,550,532 | 84,602,631 | 1004, 9703, 37916          | in gene, in gene, in gene | 5.33     |
|                                                              | Mirlet7c-2    | microRNA let7c-2                                                                                       | 15  | 85,537,032 | 85,537,126 | -7624                      | upstream                  | 5.00     |
|                                                              | Mirlet7b      | microRNA let7b                                                                                         | 15  | 85,537,748 | 85,537,832 | -8340                      | upstream                  | 5.00     |
| NM_011144                                                    | Ppara         | peroxisome proliferator activated receptor alpha                                                       | 15  | 85,566,206 | 85,633,249 | 75938                      | downstream                | 7.00     |
| NM_197998                                                    | 2210021J22Rik | RIKEN cDNA 2210021J22 gene                                                                             | 15  | 85,637,402 | 85,642,089 | -55                        | upstream                  | 7.00     |
| NM_011105                                                    | Pkdrej        | polycystic kidney disease (polycystin) and REJ (sperm receptor for egg jelly, sea urchin homolog)-like | 15  | 85,645,106 | 85,652,163 | 10019                      | downstream                | 7.00     |
| NM_001033337                                                 | AW124722      | expressed sequence AW124722                                                                            | 15  | 85,662,774 | 85,688,163 | 10666                      | in gene                   | 5.00     |
| NM_145476                                                    | Tbc1d22a      | TBC1 domain family, member 22a                                                                         | 15  | 86,044,889 | 86,328,933 | 191543, 259255             | in gene, in gene          | 8.00     |
| NM_027081                                                    | 1700027J05Rik | RIKEN cDNA 1700027J05 gene                                                                             | 15  | 89,012,643 | 89,026,905 | 345                        | in gene                   | 6.00     |
| NM_016705                                                    | Kif21a        | kinesin family member 21A                                                                              | 15  | 90,764,814 | 90,880,242 | 2                          | in gene                   | 5.00     |
| NM_011994                                                    | Abcd2         | ATP-binding cassette, sub-family D (ALD), member 2                                                     | 15  | 90,976,302 | 91,022,238 | 1550                       | in gene                   | 6.00     |
| NM_026025                                                    | Zcrb1         | zinc finger CCHC-type and RNA binding motif 1                                                          | 15  | 93,216,544 | 93,228,721 | 17                         | in gene                   | 7.00     |
| NM_001083114,<br>NM_146062,<br>NM_175363                     | Pphn1         | periphilin 1                                                                                           | 15  | 93,228,781 | 93,322,344 | -77                        | upstream                  | 7.00     |
| NM_008971                                                    | Twf1          | twinfilin, actin-binding protein, homolog 1 (Drosophila)                                               | 15  | 94,408,379 | 94,420,255 | 86                         | in gene                   | 4.00     |
| NM_175344                                                    | Tmem16f       | transmembrane protein 16F                                                                              | 15  | 95,621,274 | 95,805,205 | 17, 80742                  | in gene, in gene          | 6.00     |
| NM_175121                                                    | Slc38a2       | solute carrier family 38, member 2                                                                     | 15  | 96,517,823 | 96,530,129 | 977                        | in gene                   | 4.00     |
| NM_172293                                                    | BC038822      | cDNA sequence BC038822                                                                                 | 15  | 97,077,538 | 97,216,107 | 29534                      | in gene                   | 5.00     |

| Accession No.           | Symbol        | Gene Title                                                        | Chr | Gene Start  | Gene End    | Interval Dists to Start | Interval Pos                     | Avg Peak |
|-------------------------|---------------|-------------------------------------------------------------------|-----|-------------|-------------|-------------------------|----------------------------------|----------|
| NM_028003               | D15Ert682e    | DNA segment, Chr 15, ERATO Doi 682, expressed                     | 15  | 97,505,536  | 97,536,253  | 25453                   | in gene                          | 6.00     |
| NM_144850               | Rapgef3       | Rap guanine nucleotide exchange factor (GEF) 3                    | 15  | 97,575,384  | 97,598,103  | 20695                   | in gene                          | 5.00     |
| NM_019572               | Hdac7a        | histone deacetylase 7A                                            | 15  | 97,623,112  | 97,662,102  | 21622, 10486            | in gene, in gene                 | 5.50     |
| NM_177716               | AI836003      | expressed sequence AI836003                                       | 15  | 97,998,091  | 98,000,565  | -6203                   | upstream                         | 5.00     |
| NM_001044741, NM_007581 | Cacnb3        | calcium channel, voltage-dependent, beta 3 subunit                | 15  | 98,462,651  | 98,474,961  | 2298, 13829             | in gene, downstream              | 5.50     |
| NM_013639               | Prph1         | peripherin 1                                                      | 15  | 98,885,638  | 98,889,101  | 1242                    | in gene                          | 6.00     |
| NM_028015               | Lass5         | longevity assurance homolog 5 (S. cerevisiae)                     | 15  | 99,566,023  | 99,602,946  | 162                     | in gene                          | 7.00     |
| NM_023063               | Lima1         | LIM domain and actin binding 1                                    | 15  | 99,608,939  | 99,650,503  | 47719                   | downstream                       | 7.00     |
| NM_027011               | Krt5          | keratin 5                                                         | 15  | 101,537,501 | 101,543,322 | -5750                   | upstream                         | 6.00     |
| NM_031170               | Krt8          | keratin 8                                                         | 15  | 101,827,142 | 101,834,773 | 1397                    | in gene                          | 7.00     |
| NM_008344               | Igfbp6        | insulin-like growth factor binding protein 6                      | 15  | 101,974,793 | 101,979,943 | 6759                    | downstream                       | 6.00     |
| NM_146064               | Soat2         | sterol O-acyltransferase 2                                        | 15  | 101,981,006 | 101,993,867 | 546                     | in gene                          | 6.00     |
| NM_144942               | Csad          | cysteine sulfinic acid decarboxylase                              | 15  | 102,007,429 | 102,019,474 | -1582                   | upstream                         | 5.00     |
| NM_134100               | D15Mgi27      | DNA Segment, Chr 15, Mouse Genome Informatics 27                  | 15  | 102,109,885 | 102,112,175 | -13                     | upstream                         | 6.00     |
| NM_013672               | Sp1           | trans-acting transcription factor 1                               | 15  | 102,236,747 | 102,266,835 | 8181                    | in gene                          | 5.00     |
| NM_146065               | Atf7          | activating transcription factor 7                                 | 15  | 102,367,074 | 102,455,852 | 332                     | in gene                          | 6.00     |
| NM_026192               | Calcoco1      | calcium binding and coiled coil domain 1                          | 15  | 102,537,210 | 102,552,500 | 5892                    | in gene                          | 4.00     |
| NM_001024842            | Hoxc11        | homeo box C11                                                     | 15  | 102,784,957 | 102,787,132 | 579                     | in gene                          | 5.00     |
| NM_010462               | Hoxc10        | homeo box C10                                                     | 15  | 102,797,296 | 102,802,152 | 2560, 14288, 14896      | in gene, downstream, downstream  | 6.00     |
|                         | Mirm196a-2    | microRNA 196a-2                                                   | 15  | 102,803,780 | 102,803,864 | -3924, 7804, 8412       | upstream, downstream, downstream | 6.00     |
| NM_008272               | Hoxc9         | homeo box C9                                                      | 15  | 102,807,463 | 102,814,875 | -7607, 4121, 4729       | upstream, in gene, in gene       | 6.00     |
| XM_001479425            | LOC100043060  | similar to Unknown (protein for IMAGE:1366468)                    | 15  | 102,807,604 | 102,808,618 | 8762, -2966, -3574      | downstream, upstream, upstream   | 6.00     |
| NM_010465               | Hoxc6         | homeo box C6                                                      | 15  | 102,839,993 | 102,842,312 | -489                    | upstream                         | 5.00     |
| NM_175730               | Hoxc5         | homeo box C5                                                      | 15  | 102,844,439 | 102,847,860 | -4935                   | upstream                         | 5.00     |
|                         | Mirm615       | microRNA 615                                                      | 15  | 102,845,340 | 102,845,431 | -5836                   | upstream                         | 5.00     |
| NM_013866               | Zfp385        | zinc finger protein 385                                           | 15  | 103,144,326 | 103,170,517 | 5861, 613               | in gene, in gene                 | 4.50     |
| NM_010577               | Itga5         | integrin alpha 5 (fibronectin receptor alpha)                     | 15  | 103,174,717 | 103,197,194 | 32538, 27290            | downstream, downstream           | 4.50     |
| NM_029090               | 1200013P24Rik | RIKEN cDNA 1200013P24 gene                                        | 16  | 3,884,619   | 3,904,781   | 133                     | in gene                          | 8.00     |
| NM_026508               | Trap1         | TNF receptor-associated protein 1                                 | 16  | 4,039,977   | 4,077,810   | -30                     | upstream                         | 5.00     |
| NM_009624               | Adcy9         | adenylate cyclase 9                                               | 16  | 4,287,545   | 4,419,587   | 81235                   | in gene                          | 5.00     |
| XM_906811, XM_974329    | 4930562C15Rik | RIKEN cDNA 4930562C15 gene                                        | 16  | 4,835,416   | 4,867,691   | 31976                   | in gene                          | 7.00     |
| XM_622593, XM_974374    | 1500031H01Rik | RIKEN cDNA 1500031H01 gene                                        | 16  | 4,874,777   | 4,880,315   | 12923, 411              | downstream, in gene              | 6.00     |
| NM_029657               | Mgrn1         | mahogunin, ring finger 1                                          | 16  | 4,886,252   | 4,938,296   | -6348, 19268            | upstream, in gene                | 5.00     |
| NM_025821               | Carhsp1       | calcium regulated heat stable protein 1                           | 16  | 8,658,680   | 8,672,246   | 1814                    | in gene                          | 8.00     |
| XM_489506, XM_622598    | EG436336      | predicted gene, EG436336                                          | 16  | 8,672,327   | 8,684,000   | -1895                   | upstream                         | 8.00     |
| XM_975517               | LOC665231     | hypothetical protein LOC665231                                    | 16  | 8,829,424   | 8,830,328   | -48                     | upstream                         | 5.00     |
| XM_001480138, XM_907664 | 1810013L24Rik | RIKEN cDNA 1810013L24 gene                                        | 16  | 8,830,188   | 8,859,017   | -812                    | upstream                         | 5.00     |
| NM_007929               | Emp2          | epithelial membrane protein 2                                     | 16  | 10,281,842  | 10,314,061  | -1219                   | upstream                         | 6.00     |
| NM_021428               | Dexi          | dexamethasone-induced transcript                                  | 16  | 10,530,300  | 10,543,147  | -4597                   | upstream                         | 7.00     |
| NM_177562               | 4932416N17Rik | RIKEN cDNA 4932416N17 gene                                        | 16  | 10,545,480  | 10,744,964  | 2264                    | in gene                          | 7.00     |
| NM_009223               | Snn           | stannin                                                           | 16  | 11,066,454  | 11,075,071  | 42                      | in gene                          | 11.00    |
| NM_029582, NM_134105    | Txndc11       | thioredoxin domain containing 11                                  | 16  | 11,075,004  | 11,134,625  | 68129, 20513            | downstream, in gene              | 9.50     |
| NM_146068               | 2310008H04Rik | RIKEN cDNA 2310008H04 gene                                        | 16  | 15,889,320  | 16,146,926  | 110                     | in gene                          | 4.00     |
| NM_001001983            | Pik4ca        | phosphatidylinositol 4-kinase, catalytic, alpha polypeptide       | 16  | 17,280,445  | 17,406,407  | 487                     | in gene                          | 7.00     |
| NM_023348               | Snap29        | synaptosomal-associated protein                                   | 16  | 17,406,093  | 17,430,919  | -173                    | upstream                         | 7.00     |
| XM_001478907            | LOC100042830  | hypothetical protein LOC100042830                                 | 16  | 17,759,358  | 17,761,950  | 418                     | in gene                          | 5.00     |
| NM_145479               | Klh22         | kelch-like 22 (Drosophila)                                        | 16  | 17,759,764  | 17,793,473  | 12                      | in gene                          | 5.00     |
| NM_033474               | Arvcf         | armadillo repeat gene deleted in velo-cardio-facial syndrome      | 16  | 18,348,367  | 18,407,169  | 33617, 44401            | in gene, in gene                 | 6.50     |
| NM_001001999, NM_010327 | Gp1bb         | glycoprotein Ib, beta polypeptide                                 | 16  | 18,620,412  | 18,622,496  | -6144                   | upstream                         | 4.00     |
| NM_213614               | Sept5         | septin 5                                                          | 16  | 18,621,904  | 18,630,031  | 1391                    | in gene                          | 4.00     |
| NM_009862               | Cdc45l        | cell division cycle 45 homolog (S. cerevisiae)-like               | 16  | 18,780,545  | 18,812,065  | 225                     | in gene                          | 5.00     |
| NM_011672               | Ufd1l         | ubiquitin fusion degradation 1 like                               | 16  | 18,812,419  | 18,835,348  | -579                    | upstream                         | 5.00     |
| NM_010922               | Mprl40        | mitochondrial ribosomal protein L40                               | 16  | 18,872,310  | 18,876,730  | 58                      | in gene                          | 6.00     |
| NM_010435               | Hira          | histone cell cycle regulation defective homolog A (S. cerevisiae) | 16  | 18,876,843  | 18,970,402  | -171, 78656             | upstream, in gene                | 5.50     |
| XM_001479111            | LOC100042938  | hypothetical protein LOC100042938                                 | 16  | 20,097,560  | 20,099,755  | -56, 552                | upstream, in gene                | 7.00     |
| NM_029436               | Klh24         | kelch-like 24 (Drosophila)                                        | 16  | 20,097,627  | 20,127,817  | -123, 485               | upstream, in gene                | 7.00     |
| NM_134101               | Psmd2         | proteasome (prosome, macropain) 26S subunit, non-ATPase, 2        | 16  | 20,651,768  | 20,663,487  | 6744                    | in gene                          | 7.00     |
| NM_009379               | Thpo          | thrombopoietin                                                    | 16  | 20,724,527  | 20,734,584  | -5544                   | upstream                         | 5.00     |
| NM_009893               | Chrd          | chordin                                                           | 16  | 20,733,200  | 20,742,455  | 6928                    | in gene                          | 5.00     |

| Accession No.                               | Symbol        | Gene Title                                                                          | Chr | Gene Start | Gene End   | Interval Dists to Start | Interval Pos                             | Avg Peak |
|---------------------------------------------|---------------|-------------------------------------------------------------------------------------|-----|------------|------------|-------------------------|------------------------------------------|----------|
| NM_183029                                   | Igf2bp2       | insulin-like growth factor 2 mRNA binding protein 2                                 | 16  | 22,059,128 | 22,163,092 | 40788                   | in gene                                  | 4.00     |
| NM_178665                                   | Lpp           | LIM domain containing preferred translocation partner in lipoma                     | 16  | 24,393,576 | 24,981,116 | 47944, 258776           | in gene, in gene                         | 6.50     |
| NM_001025615,<br>NM_026202                  | Ccdc50        | coiled-coil domain containing 50                                                    | 16  | 27,389,069 | 27,448,909 | 12483                   | in gene                                  | 6.00     |
| XM_001479023,<br>XM_001480951               | 1700025H01Rik | RIKEN cDNA 1700025H01 gene                                                          | 16  | 30,195,157 | 30,200,385 | -6971                   | upstream                                 | 5.00     |
| XM_001480958,<br>XM_001480961,<br>XM_893953 | Atp13a3       | ATPase type 13A3                                                                    | 16  | 30,312,488 | 30,388,616 | -376                    | upstream                                 | 5.00     |
| NM_178069                                   | Lsg1          | large subunit GTPase 1 homolog (S. cerevisiae)                                      | 16  | 30,560,580 | 30,587,669 | 36341                   | downstream                               | 6.00     |
| NM_198626                                   | AI480653      | expressed sequence AI480653                                                         | 16  | 30,955,716 | 31,081,466 | 97882                   | in gene                                  | 6.00     |
| XM_001001008,<br>XM_986694                  | Gm536         | gene model 536, (NCBI)                                                              | 16  | 31,618,219 | 31,639,065 | -107                    | upstream                                 | 7.00     |
| NM_172822                                   | Plgz          | phosphatidylinositol glycan anchor biosynthesis, class Z                            | 16  | 31,934,040 | 31,946,132 | -856, 14472             | upstream,<br>downstream                  | 7.00     |
| XR_035420                                   | 0610012G03Rik | RIKEN cDNA 0610012G03 gene                                                          | 16  | 31,947,137 | 31,948,595 | 83                      | in gene                                  | 9.00     |
| NM_026554                                   | Ncbp2         | nuclear cap binding protein subunit 2                                               | 16  | 31,948,725 | 31,958,267 | -213                    | upstream                                 | 9.00     |
| NM_177103                                   | Senp5         | SUMO/sentrin specific peptidase 5                                                   | 16  | 31,962,639 | 32,003,257 | 121                     | in gene                                  | 6.00     |
| XM_619387,<br>XM_914704                     | Ubx7          | UBX domain containing 7                                                             | 16  | 32,330,782 | 32,387,978 | 5650                    | in gene                                  | 8.00     |
| NM_025329                                   | 0610012D17Rik | RIKEN cDNA 0610012D17 gene                                                          | 16  | 32,419,830 | 32,429,184 | 11098                   | downstream                               | 6.00     |
| NM_009981                                   | Pcyt1a        | phosphate cytidyltransferase 1, choline, alpha isoform                              | 16  | 32,431,082 | 32,472,101 | -154                    | upstream                                 | 6.00     |
| NM_016788                                   | Tnk2          | tyrosine kinase, non-receptor, 2                                                    | 16  | 32,644,947 | 32,683,579 | 1293                    | in gene                                  | 7.00     |
| NM_172615                                   | 1700021K19Rik | RIKEN cDNA 1700021K19 gene                                                          | 16  | 32,821,822 | 32,868,425 | 18153                   | in gene                                  | 4.00     |
| NM_172934                                   | 4632417D23Rik | RIKEN cDNA 4632417D23 gene                                                          | 16  | 33,684,552 | 33,722,999 | 2376                    | in gene                                  | 6.00     |
| NM_010739                                   | Muc13         | mucin 13, epithelial transmembrane                                                  | 16  | 33,794,123 | 33,820,013 | 28517                   | downstream                               | 6.00     |
| NM_010580                                   | Itgb5         | integrin beta 5                                                                     | 16  | 33,829,845 | 33,949,232 | -7205                   | upstream                                 | 6.00     |
| NM_009471                                   | Umps          | uridine monophosphate synthetase                                                    | 16  | 33,955,098 | 33,967,089 | -495                    | upstream                                 | 6.00     |
| NM_023587                                   | Ptpfb         | protein tyrosine phosphatase-like (proline instead of catalytic arginine), member b | 16  | 35,022,507 | 35,109,261 | -59                     | upstream                                 | 7.00     |
| NM_001012765                                | Adcy5         | adenylate cyclase 5                                                                 | 16  | 35,154,963 | 35,305,821 | 56957                   | in gene                                  | 5.00     |
| NM_028295                                   | Pdia5         | protein disulfide isomerase associated 5                                            | 16  | 35,397,398 | 35,490,959 | 51823                   | in gene                                  | 7.00     |
| NM_153550                                   | Dir2          | disrupted in renal carcinoma 2 (human)                                              | 16  | 35,694,989 | 35,769,442 | 18770                   | in gene                                  | 5.00     |
| NM_026439                                   | Ccdc80        | coiled-coil domain containing 80                                                    | 16  | 45,094,166 | 45,128,037 | -22, 2218               | upstream, in gene                        | 5.00     |
| NM_172511                                   | Abhd10        | abhydrolase domain containing 10                                                    | 16  | 45,730,510 | 45,743,017 | 105                     | in gene                                  | 5.00     |
| NM_153412                                   | Phldb2        | pleckstrin homology-like domain, family B, member 2                                 | 16  | 45,746,356 | 45,844,491 | 101579                  | downstream                               | 5.00     |
| XM_001481102,<br>XM_489641                  | Plcx2         | phosphatidylinositol-specific phospholipase C, X domain containing 2                | 16  | 45,959,376 | 46,010,526 | -1218                   | upstream                                 | 9.00     |
| NM_001033238                                | Cblb          | Casitas B-lineage lymphoma b                                                        | 16  | 52,031,662 | 52,208,160 | 151202                  | in gene                                  | 7.00     |
| XM_001003685,<br>XM_925022                  | Gm1752        | gene model 1752, (NCBI)                                                             | 16  | 55,843,294 | 55,895,398 | 214                     | in gene                                  | 6.00     |
| NM_028815                                   | Lrr12         | leucine-rich repeats and IQ motif containing 2                                      | 16  | 55,902,376 | 55,934,961 | 39777                   | downstream                               | 6.00     |
| XM_001479180,<br>XM_001480210               | LOC629242     | hypothetical protein LOC629242                                                      | 16  | 55,961,428 | 55,965,167 | 13212                   | downstream                               | 5.00     |
| NM_024218                                   | Rpl24         | ribosomal protein L24                                                               | 16  | 55,966,506 | 55,971,547 | 8134                    | downstream                               | 5.00     |
| XM_001480244,<br>XM_001481121               | Zbtb11        | zinc finger and BTB domain containing 11                                            | 16  | 55,973,929 | 56,009,026 | 711                     | in gene                                  | 5.00     |
| NM_026254                                   | Tbc1d23       | TBC1 domain family, member 23                                                       | 16  | 57,168,975 | 57,231,579 | 14011                   | in gene                                  | 6.00     |
| NM_025599                                   | 2610528E23Rik | RIKEN cDNA 2610528E23 gene                                                          | 16  | 57,302,113 | 57,606,956 | 168588, 150956          | in gene, in gene                         | 4.50     |
| NM_001040397                                | 4631422O05Rik | RIKEN cDNA 4631422O05 gene                                                          | 16  | 57,353,390 | 57,515,803 | 84978, 102610           | in gene, in gene                         | 4.50     |
| NM_175549                                   | Robo2         | roundabout homolog 2 (Drosophila)                                                   | 16  | 73,892,551 | 74,411,157 | 449045                  | in gene                                  | 7.00     |
| NM_173440                                   | Nrip1         | nuclear receptor interacting protein 1                                              | 16  | 76,291,107 | 76,373,294 | 58654                   | in gene                                  | 6.00     |
| NM_001081068                                | Zfp294        | zinc finger protein 294                                                             | 16  | 87,376,896 | 87,432,851 | 29763                   | in gene                                  | 6.00     |
| NM_015755                                   | Hunk          | hormonally upregulated Neu-associated kinase                                        | 16  | 90,386,642 | 90,499,798 | 38574                   | in gene                                  | 6.00     |
| NM_027627                                   | 4931408A02Rik | RIKEN cDNA 4931408A02 gene                                                          | 16  | 90,831,358 | 90,904,940 | 51682                   | in gene                                  | 9.00     |
| NM_080456                                   | Mrps6         | mitochondrial ribosomal protein S6                                                  | 16  | 92,058,581 | 92,112,472 | 20107                   | in gene                                  | 5.00     |
| NM_017391                                   | Slc5a3        | solute carrier family 5 (inositol transporters), member 3                           | 16  | 92,077,302 | 92,079,458 | 1386                    | in gene                                  | 5.00     |
| NM_001081549,<br>NM_019466                  | Dscr1         | Down syndrome critical region homolog 1 (human)                                     | 16  | 92,392,198 | 92,466,391 | 64959, 30012            | in gene, in gene                         | 5.00     |
| XM_001473308,<br>XM_001475819               | 2410124H12Rik | RIKEN cDNA 2410124H12 gene                                                          | 16  | 92,478,987 | 92,497,610 | 19413, 19829, 22613     | downstream,<br>downstream,<br>downstream | 5.33     |
| NM_172469                                   | Clic6         | chloride intracellular channel 6                                                    | 16  | 92,498,392 | 92,541,486 | 8, 424, 3208            | in gene, in gene, in<br>gene             | 5.33     |
| NM_026700,<br>NM_027293                     | Dopey2        | dopey family member 2                                                               | 16  | 93,712,152 | 93,810,833 | 69256, 96248            | in gene, in gene                         | 8.00     |
| NM_133659                                   | Erg           | avian erythroblastosis virus E-26 (v-ets) oncogene related                          | 16  | 95,581,811 | 95,751,972 | 34324                   | in gene                                  | 6.00     |
| NM_145125                                   | Brwd1         | bromodomain and WD repeat domain containing 1                                       | 16  | 96,214,054 | 96,304,033 | 63673                   | in gene                                  | 4.00     |
| NM_008251                                   | Hmgn1         | high mobility group nucleosomal binding domain 1                                    | 16  | 96,343,195 | 96,349,332 | -620, -8300             | upstream, upstream                       | 5.50     |
| NM_207301                                   | Wrb           | tryptophan rich basic protein                                                       | 16  | 96,367,026 | 96,379,459 | -9394                   | upstream                                 | 5.00     |

| Accession No.                 | Symbol        | Gene Title                                                                 | Chr | Gene Start | Gene End   | Interval Dists to Start        | Interval Pos                                    | Avg Peak |
|-------------------------------|---------------|----------------------------------------------------------------------------|-----|------------|------------|--------------------------------|-------------------------------------------------|----------|
| NM_015775                     | Tmprss2       | transmembrane protease, serine 2                                           | 16  | 97,786,289 | 97,832,802 | 17426                          | in gene                                         | 5.00     |
| XM_619423,<br>XM_918778       | Rbm16         | RNA binding motif protein 16                                               | 17  | 3,104,693  | 3,198,859  | 10379                          | in gene                                         | 6.00     |
| NM_146073                     | Zdhhc14       | zinc finger, DHHC domain containing 14                                     | 17  | 5,492,600  | 5,753,891  | 104104, 230488                 | in gene, in gene                                | 6.00     |
| NM_011523                     | Synj2         | synaptojanin 2                                                             | 17  | 5,975,641  | 6,044,290  | 1079                           | in gene                                         | 6.00     |
| NM_010515                     | Igf2r         | insulin-like growth factor 2 receptor                                      | 17  | 12,875,272 | 12,962,572 | 64940                          | in gene                                         | 6.00     |
| NM_001034891,<br>NM_001039552 | 9030025P20Rik | RIKEN cDNA 9030025P20 gene                                                 | 17  | 15,158,724 | 15,201,187 | 34204                          | in gene                                         | 6.00     |
| XM_974092                     | 5830433110Rik | RIKEN cDNA 5830433110 gene                                                 | 17  | 15,840,976 | 15,842,227 | -589                           | upstream                                        | 5.00     |
| NM_007690                     | Chd1          | chromodomain helicase DNA binding protein 1                                | 17  | 15,842,254 | 15,907,328 | 562                            | in gene                                         | 5.00     |
| NM_172827                     | Lnpep         | leucyl/cystinyl aminopeptidase                                             | 17  | 17,664,687 | 17,761,453 | -211                           | upstream                                        | 8.00     |
| XM_891564                     | EG626942      | predicted gene, EG626942                                                   | 17  | 17,847,275 | 17,964,398 | 116565                         | in gene                                         | 8.00     |
|                               | Mirn99b       | microRNA 99b                                                               | 17  | 17,967,151 | 17,967,220 | -3311, 8113                    | upstream,<br>downstream                         | 7.50     |
|                               | Mirlet7e      | microRNA let7e                                                             | 17  | 17,967,315 | 17,967,407 | -3475, 7949                    | upstream,<br>downstream                         | 7.50     |
|                               | Mir125a       | microRNA 125a                                                              | 17  | 17,967,775 | 17,967,842 | -3935, 7489                    | upstream,<br>downstream                         | 7.50     |
| NM_029205                     | 4930546H06Rik | RIKEN cDNA 4930546H06 gene                                                 | 17  | 17,968,028 | 17,979,973 | -4188, 7236                    | upstream, in gene                               | 7.50     |
| NM_008215                     | Has1          | hyaluronan synthase 1                                                      | 17  | 17,980,287 | 17,992,150 | 16886                          | downstream                                      | 7.00     |
| NM_011747                     | Zfp13         | zinc finger protein 13                                                     | 17  | 23,712,819 | 23,736,454 | 6614                           | in gene                                         | 7.00     |
| NM_001033425                  | Zscan10       | zinc finger and SCAN domains 10                                            | 17  | 23,737,823 | 23,747,979 | -7983                          | upstream                                        | 7.00     |
| NM_175229                     | Srrm2         | serine/arginine repetitive matrix 2                                        | 17  | 23,940,154 | 23,961,708 | 26150                          | downstream                                      | 6.00     |
| NM_026305                     | Tceb2         | transcription elongation factor B (SIII), polypeptide 2                    | 17  | 23,961,707 | 23,966,076 | -228                           | upstream                                        | 6.00     |
| NM_001081399                  | Prss33        | protease, serine, 33                                                       | 17  | 23,970,832 | 23,973,032 | 6728                           | downstream                                      | 6.00     |
| NM_027644                     | 4931440B09Rik | RIKEN cDNA 4931440B09 gene                                                 | 17  | 23,973,752 | 23,981,123 | 14819                          | downstream                                      | 6.00     |
| NM_133731                     | Prss22        | protease, serine, 22                                                       | 17  | 24,130,501 | 24,135,050 | 7042                           | downstream                                      | 5.00     |
| NM_175440                     | Prss27        | protease, serine 27                                                        | 17  | 24,175,210 | 24,182,916 | 6742                           | in gene                                         | 5.00     |
| NM_027008                     | Kctd5         | potassium channel tetramerisation domain containing 5                      | 17  | 24,184,705 | 24,210,404 | 28452                          | downstream                                      | 5.00     |
| NM_001080773,<br>NM_011062    | Pdpk1         | 3-phosphoinositide dependent protein kinase-1                              | 17  | 24,210,647 | 24,278,556 | 140                            | in gene                                         | 8.00     |
| NM_013630                     | Pkd1          | polycystic kidney disease 1 homolog                                        | 17  | 24,686,895 | 24,733,459 | 326, 38177, 44634, 50697       | in gene, in gene, in<br>gene, downstream        | 5.00     |
| NM_001039363,<br>NM_011647    | Tsc2          | tuberous sclerosis 2                                                       | 17  | 24,732,882 | 24,769,574 | 44502, 38045, 31982, -<br>5925 | downstream,<br>downstream, in gene,<br>upstream | 4.50     |
| NM_008743                     | Nthl1         | nth (endonuclease III)-like 1 (E.coli)                                     | 17  | 24,769,655 | 24,775,782 | 5844                           | in gene                                         | 5.00     |
| NM_023055,<br>NM_023449       | Slc9a3r2      | solute carrier family 9 (sodium/hydrogen exchanger), isoform 3 regulator 2 | 17  | 24,776,233 | 24,787,223 | 11724, -1449                   | downstream,<br>upstream                         | 5.00     |
| XM_001478349,<br>XM_993080    | Npw           | neuropeptide W                                                             | 17  | 24,794,275 | 24,796,344 | 7672                           | downstream                                      | 5.00     |
| NM_134126                     | Ift140        | intraflagellar transport 140 homolog (Chlamydomonas)                       | 17  | 25,153,668 | 25,236,431 | 61228                          | in gene                                         | 6.00     |
| NM_001001183                  | BC054438      | cDNA sequence BC054438                                                     | 17  | 25,194,647 | 25,218,059 | 3163                           | in gene                                         | 6.00     |
| NM_027880                     | Telo2         | TEL2, telomere maintenance 2, homolog (S. cerevisiae)                      | 17  | 25,236,522 | 25,252,720 | -7904                          | upstream                                        | 5.00     |
| XM_128459,<br>XM_914629       | 1110018H23Rik | RIKEN cDNA 1110018H23 gene                                                 | 17  | 25,257,705 | 25,262,213 | 2919                           | in gene                                         | 5.00     |
| NM_011930                     | Clcn7         | chloride channel 7                                                         | 17  | 25,270,339 | 25,299,044 | -9715                          | upstream                                        | 5.00     |
| NM_028789                     | Unkl          | unkempt-like (Drosophila)                                                  | 17  | 25,359,527 | 25,371,387 | 12057                          | downstream                                      | 6.00     |
| NM_172529                     | Gnptg         | N-acetylglucosamine-1-phosphotransferase, gamma subunit                    | 17  | 25,371,262 | 25,377,061 | 5477                           | in gene                                         | 6.00     |
| NM_026676                     | 0610007P22Rik | RIKEN cDNA 0610007P22 gene                                                 | 17  | 25,377,144 | 25,379,740 | -5560                          | upstream                                        | 6.00     |
| NM_029624                     | Tmem112       | transmembrane protein 112                                                  | 17  | 25,716,134 | 25,799,668 | 77050                          | in gene                                         | 6.00     |
| NM_173741                     | Wdr24         | WD repeat domain 24                                                        | 17  | 25,960,661 | 25,965,669 | 9259                           | downstream                                      | 9.00     |
| NM_028101                     | 2610003J06Rik | RIKEN cDNA 2610003J06 gene                                                 | 17  | 25,965,992 | 25,968,711 | 3928                           | downstream                                      | 9.00     |
| NM_019719                     | Stub1         | STIP1 homology and U-Box containing protein 1                              | 17  | 25,967,581 | 25,970,306 | 386                            | in gene                                         | 9.00     |
| NM_144816                     | Rhbd1         | rhomboid, veinlet-like 1 (Drosophila)                                      | 17  | 25,971,410 | 25,974,072 | 4152                           | downstream                                      | 9.00     |
| NM_145999                     | Rhot2         | ras homolog gene family, member T2                                         | 17  | 25,975,783 | 25,981,796 | 11876                          | downstream                                      | 9.00     |
| NM_139154                     | Rab40c        | Rab40c, member RAS oncogene family                                         | 17  | 26,019,059 | 26,056,647 | -169                           | upstream                                        | 9.00     |
| NM_011822                     | Pigq          | phosphatidylinositol glycan anchor biosynthesis, class Q                   | 17  | 26,063,369 | 26,078,907 | 22091                          | downstream                                      | 9.00     |
| NM_021793                     | Tmem8         | transmembrane protein 8 (five membrane-spanning domains)                   | 17  | 26,250,262 | 26,260,199 | 6837                           | in gene                                         | 5.00     |
| NM_024227                     | Mrip28        | mitochondrial ribosomal protein L28                                        | 17  | 26,260,477 | 26,263,558 | -3378                          | upstream                                        | 5.00     |
| NM_026170                     | Ergic1        | endoplasmic reticulum-golgi intermediate compartment (ERGIC) 1             | 17  | 26,698,457 | 26,793,879 | 41959                          | in gene                                         | 8.00     |
| NM_008700                     | Nkx2-5        | NK2 transcription factor related, locus 5 (Drosophila)                     | 17  | 26,975,610 | 26,978,510 | 3294                           | downstream                                      | 6.00     |
| NM_011861,<br>NM_178365       | Pacsin1       | protein kinase C and casein kinase substrate in neurons 1                  | 17  | 27,792,627 | 27,848,051 | 61517                          | downstream                                      | 5.00     |
| NM_013891                     | Spdef         | SAM pointed domain containing ets transcription factor                     | 17  | 27,851,395 | 27,865,865 | 11721                          | in gene                                         | 5.00     |
| NM_001033279,<br>NM_001044719 | D17Wsu92e     | DNA segment, Chr 17, Wayne State University 92, expressed                  | 17  | 27,888,180 | 27,957,487 | 34463                          | in gene                                         | 7.00     |
| NM_181413                     | Anks1         | ankyrin repeat and SAM domain containing 1                                 | 17  | 28,046,285 | 28,199,582 | 59235, 120115                  | in gene, in gene                                | 6.00     |
| NM_011566                     | Tead3         | TEA domain family member 3                                                 | 17  | 28,468,620 | 28,487,545 | -4071                          | upstream                                        | 6.00     |



| Accession No.                 | Symbol        | Gene Title                                                                               | Chr | Gene Start | Gene End   | Interval Dists to Start | Interval Pos                    | Avg Peak |
|-------------------------------|---------------|------------------------------------------------------------------------------------------|-----|------------|------------|-------------------------|---------------------------------|----------|
| NM_021478                     | Tulp1         | tubby like protein 1                                                                     | 17  | 28,488,464 | 28,502,088 | 10472                   | in gene                         | 6.00     |
| XM_001478871                  | LOC100042815  | hypothetical protein LOC100042815                                                        | 17  | 29,230,361 | 29,231,484 | -9849                   | upstream                        | 5.00     |
| NM_007669                     | Cdkn1a        | cyclin-dependent kinase inhibitor 1A (P21)                                               | 17  | 29,230,720 | 29,237,667 | -10208                  | upstream                        | 5.00     |
| NM_026845                     | Ppil1         | peptidylprolyl isomerase (cyclophilin)-like 1                                            | 17  | 29,387,780 | 29,400,916 | -4924                   | upstream                        | 7.00     |
| NM_030561                     | BC004004      | cDNA sequence BC004004                                                                   | 17  | 29,405,924 | 29,439,826 | -84                     | upstream                        | 7.00     |
| NM_019880                     | Mtch1         | mitochondrial carrier homolog 1 (C. elegans)                                             | 17  | 29,469,021 | 29,484,849 | -7754                   | upstream                        | 5.00     |
| NM_013710                     | Fgd2          | FYVE, RhoGEF and PH domain containing 2                                                  | 17  | 29,497,859 | 29,516,498 | -5256                   | upstream                        | 5.00     |
| NM_198647                     | Tbc1d22b      | TBC1 domain family, member 22B                                                           | 17  | 29,686,747 | 29,743,753 | 44997                   | in gene                         | 5.00     |
| NM_028791                     | 1300018I05Rik | RIKEN cDNA 1300018I05 gene                                                               | 17  | 29,797,546 | 29,840,304 | -10                     | upstream                        | 6.00     |
| NM_001081160                  | Mdga1         | MAM domain containing glycosylphosphatidylinositol anchor 1                              | 17  | 29,964,903 | 30,024,827 | 44955                   | in gene                         | 5.00     |
| NM_009593                     | Abcg1         | ATP-binding cassette, sub-family G (WHITE), member 1                                     | 17  | 31,187,732 | 31,252,722 | 29132                   | in gene                         | 5.00     |
| XM_987982                     | EG667056      | predicted gene, EG667056                                                                 | 17  | 31,430,697 | 31,436,767 | -9473                   | upstream                        | 6.00     |
| NM_153062                     | Slc37a1       | solute carrier family 37 (glycerol-3-phosphate transporter), member 1                    | 17  | 31,432,428 | 31,487,654 | 13812                   | in gene                         | 6.00     |
| NM_016670                     | Pknox1        | Pbx/knotted 1 homeobox                                                                   | 17  | 31,720,641 | 31,744,629 | 32591                   | downstream                      | 4.00     |
| NM_144855,<br>NM_178224       | Cbs           | cystathionine beta-synthase                                                              | 17  | 31,749,589 | 31,774,086 | 20854, 11942            | in gene, in gene                | 4.00     |
| XM_484622,<br>XM_904809       | Hsf2bp        | heat shock transcription factor 2 binding protein                                        | 17  | 32,081,714 | 32,171,453 | 97373                   | downstream                      | 6.00     |
| NM_028244                     | Rrp1b         | ribosomal RNA processing 1 homolog B (S. cerevisiae)                                     | 17  | 32,173,107 | 32,197,550 | 26765                   | downstream                      | 8.00     |
| NM_008716                     | Notch3        | Notch gene homolog 3 (Drosophila)                                                        | 17  | 32,257,838 | 32,303,797 | 51365                   | downstream                      | 5.00     |
| NM_172458                     | 9030612M13Rik | RIKEN cDNA 9030612M13 gene                                                               | 17  | 32,902,441 | 32,925,232 | 48                      | in gene                         | 9.00     |
| NM_183177                     | Zfp811        | zinc finger protein 811                                                                  | 17  | 32,933,934 | 32,946,798 | 21614                   | downstream                      | 9.00     |
| NM_013585                     | Psmb9         | proteasome (prosome, macropain) subunit, beta type 9 (large multifunctional peptidase 2) | 17  | 34,319,044 | 34,324,275 | -109                    | upstream                        | 6.00     |
| NM_013683                     | Tap1          | transporter 1, ATP-binding cassette, sub-family B (MDR/TAP)                              | 17  | 34,324,825 | 34,333,744 | -441                    | upstream                        | 6.00     |
| NM_019441                     | Ppt2          | palmitoyl-protein thioesterase 2                                                         | 17  | 34,753,607 | 34,764,042 | -566, -5382             | upstream, upstream              | 6.50     |
| NM_030890                     | Prrt1         | proline-rich transmembrane protein 1                                                     | 17  | 34,766,631 | 34,769,205 | -2023, 2793             | upstream, downstream            | 6.50     |
| NM_013558                     | Hspa1l        | heat shock protein 1-like                                                                | 17  | 35,109,648 | 35,116,173 | 10048                   | downstream                      | 7.00     |
| NM_030597                     | Lsm2          | LSM2 homolog, U6 small nuclear RNA associated (S. cerevisiae)                            | 17  | 35,119,082 | 35,122,836 | 614                     | in gene                         | 7.00     |
| NM_033478                     | Ly6g6d        | lymphocyte antigen 6 complex, locus G6D                                                  | 17  | 35,208,293 | 35,211,409 | -5775                   | upstream                        | 8.00     |
| NM_027366                     | Ly6g6e        | lymphocyte antigen 6 complex, locus G6E                                                  | 17  | 35,213,887 | 35,215,749 | 3297                    | downstream                      | 8.00     |
| NM_178592                     | Bat5          | HLA-B associated transcript 5                                                            | 17  | 35,226,236 | 35,239,932 | -9052                   | upstream                        | 8.00     |
| NM_032460                     | Bat4          | HLA-B associated transcript 4                                                            | 17  | 35,259,897 | 35,261,751 | 11943                   | downstream                      | 5.00     |
| NM_010909                     | Nfkbil1       | nuclear factor of kappa light polypeptide gene enhancer in B-cells inhibitor-like 1      | 17  | 35,357,120 | 35,372,760 | -40                     | upstream                        | 8.00     |
| NM_023179                     | Atp6v1g2      | ATPase, H+ transporting, lysosomal V1 subunit G2                                         | 17  | 35,373,541 | 35,375,712 | -741                    | upstream                        | 8.00     |
| NM_019693                     | Bat1a         | HLA-B-associated transcript 1A                                                           | 17  | 35,378,815 | 35,390,628 | -6015, 21217            | upstream, downstream            | 7.50     |
| NM_010380                     | H2-D1         | histocompatibility 2, D region locus 1                                                   | 17  | 35,400,039 | 35,404,442 | -7                      | upstream                        | 7.00     |
| NM_175137                     | Vars2         | valyl-tRNA synthetase 2, mitochondrial (putative)                                        | 17  | 35,793,335 | 35,804,537 | 3049                    | in gene                         | 5.00     |
| NM_010364                     | Gtf2h4        | general transcription factor II H, polypeptide 4                                         | 17  | 35,804,684 | 35,810,627 | 9139                    | downstream                      | 5.00     |
| XM_001480927                  | LOC100043663  | hypothetical protein LOC100043663                                                        | 17  | 35,840,843 | 35,845,189 | 155                     | in gene                         | 4.00     |
| NM_133662                     | ler3          | immediate early response 3                                                               | 17  | 35,958,658 | 35,959,856 | 334, 1726               | in gene, downstream             | 6.00     |
| NM_008027                     | Flot1         | flotillin 1                                                                              | 17  | 35,960,302 | 35,969,732 | -1310, 82, 14482        | upstream, in gene, downstream   | 5.67     |
| NM_011655                     | Tubb5         | tubulin, beta 5                                                                          | 17  | 35,970,865 | 35,975,177 | 393                     | in gene                         | 5.00     |
| NM_001010833                  | Mdc1          | mediator of DNA damage checkpoint 1                                                      | 17  | 35,978,443 | 35,996,615 | -3659, 26581            | upstream, downstream            | 6.00     |
| NM_134122                     | Nrm           | nurim (nuclear envelope membrane protein)                                                | 17  | 35,998,263 | 36,002,345 | 6761                    | downstream                      | 7.00     |
| XM_001003622,<br>XM_001474189 | 2310014H01Rik | RIKEN cDNA 2310014H01 gene                                                               | 17  | 36,003,079 | 36,012,541 | 1945, 13545             | in gene, downstream             | 6.00     |
| NM_026987                     | Dhx16         | DEAH (Asp-Glu-Ala-His) box polypeptide 16                                                | 17  | 36,016,764 | 36,029,615 | -140                    | upstream                        | 5.00     |
| NM_010814                     | Mog           | myelin oligodendrocyte glycoprotein                                                      | 17  | 37,147,685 | 37,160,343 | -809                    | upstream                        | 4.00     |
| NM_172621                     | Clic5         | chloride intracellular channel 5                                                         | 17  | 44,325,521 | 44,417,117 | 41327                   | in gene                         | 5.00     |
| NM_009820                     | Runx2         | runt related transcription factor 2                                                      | 17  | 44,740,950 | 44,951,576 | 166472, 144696, 37688   | in gene, in gene, in gene       | 5.33     |
| NM_178652                     | Supt3h        | suppressor of Ty 3 homolog (S. cerevisiae)                                               | 17  | 44,914,120 | 45,256,233 | -232                    | upstream                        | 5.00     |
| NM_013688                     | Tcte1         | t-complex-associated testis expressed 1                                                  | 17  | 45,660,383 | 45,679,628 | 27777                   | downstream                      | 6.00     |
| NM_001013749                  | Gm323         | gene model 323, (NCBI)                                                                   | 17  | 45,678,901 | 45,686,626 | -1534                   | upstream                        | 6.00     |
| NM_008690                     | Nfkbie        | nuclear factor of kappa light polypeptide gene enhancer in B-cells inhibitor, epsilon    | 17  | 45,692,665 | 45,700,118 | -4505                   | upstream                        | 6.00     |
| NM_028662                     | Slc35b2       | solute carrier family 35, member B2                                                      | 17  | 45,701,101 | 45,704,618 | 9779                    | downstream                      | 10.00    |
| NM_008302                     | Hsp90ab1      | heat shock protein 90kDa alpha (cytosolic), class B member 1                             | 17  | 45,704,727 | 45,710,210 | -670                    | upstream                        | 10.00    |
| NM_029338                     | 1700027N10Rik | RIKEN cDNA 1700027N10 gene                                                               | 17  | 46,266,226 | 46,281,147 | 14203                   | in gene                         | 8.00     |
| NM_019581                     | Gtpbp2        | GTP binding protein 2                                                                    | 17  | 46,298,020 | 46,306,317 | 7836                    | in gene                         | 6.00     |
| NM_030715                     | Polh          | polymerase (DNA directed), eta (RAD 30 related)                                          | 17  | 46,308,942 | 46,339,574 | 33718                   | downstream                      | 6.00     |
| NM_028751                     | Tjap1         | tight junction associated protein 1                                                      | 17  | 46,394,825 | 46,419,962 | 7786                    | in gene                         | 6.00     |
| NM_029091                     | Klc4          | kinesin light chain 4                                                                    | 17  | 46,767,580 | 46,782,093 | 15741, 15021, 9229      | downstream, downstream, in gene | 8.33     |

| Accession No.                               | Symbol        | Gene Title                                                                          | Chr | Gene Start | Gene End   | Interval Dists to Start | Interval Pos              | Avg Peak |
|---------------------------------------------|---------------|-------------------------------------------------------------------------------------|-----|------------|------------|-------------------------|---------------------------|----------|
| NM_028065                                   | Tnrc5         | trinucleotide repeat containing 5                                                   | 17  | 46,872,657 | 46,889,149 | -67                     | upstream                  | 5.00     |
| NM_011195                                   | Ptcra         | pre T-cell antigen receptor alpha                                                   | 17  | 46,892,610 | 46,900,661 | 11445                   | downstream                | 5.00     |
| XM_140042,<br>XM_911987                     | EG240110      | predicted gene, EG240110                                                            | 17  | 47,179,386 | 47,179,988 | 3972                    | downstream                | 5.00     |
| NM_172622                                   | Tref1         | transcriptional regulating factor 1                                                 | 17  | 47,450,898 | 47,496,398 | -5394                   | upstream                  | 5.00     |
| NM_001081635,<br>NM_001081636,<br>NM_007632 | Ccnd3         | cyclin D3                                                                           | 17  | 47,642,000 | 47,736,638 | 90341                   | in gene                   | 5.00     |
| NM_016859                                   | Bysl          | bystin-like                                                                         | 17  | 47,737,029 | 47,748,433 | 16092                   | downstream                | 5.00     |
| NM_028232                                   | Sgol1         | shugoshin-like 1 (S. pombe)                                                         | 17  | 53,815,385 | 53,828,637 | 5037                    | in gene                   | 6.00     |
| NM_020568                                   | S3-12         | plasma membrane associated protein, S3-12                                           | 17  | 56,240,017 | 56,249,226 | 8330, -550              | in gene, upstream         | 6.00     |
| NM_001077348,<br>NM_025874                  | 2310076L09Rik | RIKEN cDNA 2310076L09 gene                                                          | 17  | 56,251,024 | 56,256,971 | 16075, 7195             | downstream,<br>downstream | 6.00     |
| NM_029796                                   | Lrg1          | leucine-rich alpha-2-glycoprotein 1                                                 | 17  | 56,259,101 | 56,261,369 | 11593                   | downstream                | 6.00     |
| NM_025566                                   | Tnfaip81      | tumor necrosis factor, alpha-induced protein 8-like 1                               | 17  | 56,301,997 | 56,313,376 | 10643                   | in gene                   | 5.00     |
| NM_080837                                   | D17Wsu104e    | DNA segment, Chr 17, Wayne State University 104, expressed                          | 17  | 56,315,964 | 56,323,343 | 10703                   | downstream                | 5.00     |
| XM_001480312,<br>XM_924956                  | Safb          | scaffold attachment factor B                                                        | 17  | 56,724,280 | 56,745,717 | 28440                   | downstream                | 6.00     |
| NM_153152                                   | 2410015M20Rik | RIKEN cDNA 2410015M20 gene                                                          | 17  | 56,746,875 | 56,749,194 | -3526                   | upstream                  | 6.00     |
| NM_018730                                   | Rpl36         | ribosomal protein L36                                                               | 17  | 56,752,857 | 56,753,670 | -137                    | upstream                  | 6.00     |
| NM_028782                                   | Lonp1         | lon peptidase 1, mitochondrial                                                      | 17  | 56,753,720 | 56,766,326 | 13606                   | downstream                | 6.00     |
| XM_884088,<br>XM_914378                     | LOC619718     | hypothetical LOC619718                                                              | 17  | 56,769,821 | 56,787,232 | 7651                    | in gene                   | 5.00     |
| NM_027933                                   | Ranbp3        | RAN binding protein 3                                                               | 17  | 56,812,680 | 56,851,192 | 43288                   | downstream                | 5.00     |
| NM_178926                                   | Al662250      | expressed sequence Al662250                                                         | 17  | 56,853,361 | 56,856,275 | 307                     | in gene                   | 5.00     |
| XM_895878,<br>XM_924988                     | Ndufa11       | NADH dehydrogenase (ubiquinone) 1 alpha subcomplex 11                               | 17  | 56,857,185 | 56,862,115 | -1217                   | upstream                  | 5.00     |
| NM_144858                                   | Dus3l         | dihydrouridine synthase 3-like (S. cerevisiae)                                      | 17  | 56,904,201 | 56,909,264 | 13207                   | downstream                | 6.00     |
| XM_148801,<br>XM_914449                     | Gm546         | gene model 546, (NCBI)                                                              | 17  | 56,909,699 | 56,911,557 | 7709                    | downstream                | 6.00     |
| NM_010613                                   | Khsrp         | KH-type splicing regulatory protein                                                 | 17  | 57,160,474 | 57,170,930 | -1102                   | upstream                  | 5.00     |
| NM_175333                                   | Slc25a41      | solute carrier family 25, member 41                                                 | 17  | 57,172,195 | 57,181,077 | 9045                    | downstream                | 5.00     |
| XM_001478480,<br>XM_484656                  | A930002H24Rik | RIKEN cDNA A930002H24 gene                                                          | 17  | 64,211,417 | 64,216,530 | 3314                    | in gene                   | 8.00     |
| NM_013933                                   | Vapa          | vesicle-associated membrane protein, associated protein A                           | 17  | 65,929,395 | 65,962,881 | 33, -511                | in gene, upstream         | 7.50     |
| NM_001025572                                | Ankrd12       | ankyrin repeat domain 12                                                            | 17  | 66,316,841 | 66,426,386 | 119410                  | downstream                | 6.00     |
| NM_009372                                   | Tgif1         | TG interacting factor 1                                                             | 17  | 71,193,555 | 71,200,538 | 90                      | in gene                   | 6.00     |
| NM_010867                                   | Myom1         | myomesin 1                                                                          | 17  | 71,368,861 | 71,476,195 | 110627                  | downstream                | 7.00     |
| NM_145158                                   | Emilin2       | elastin microfibril interfacier 2                                                   | 17  | 71,601,511 | 71,660,806 | 10630                   | in gene                   | 7.00     |
| NM_007439                                   | Alk           | anaplastic lymphoma kinase                                                          | 17  | 72,218,328 | 72,953,647 | 358799                  | in gene                   | 5.00     |
| NM_027166                                   | Ypel5         | yippee-like 5 (Drosophila)                                                          | 17  | 73,186,044 | 73,200,535 | 900                     | in gene                   | 7.00     |
| NM_027864                                   | Galnt14       | UDP-N-acetyl-alpha-D-galactosamine:polypeptide N-acetylgalactosaminyltransferase 14 | 17  | 73,842,568 | 74,059,404 | 137228                  | in gene                   | 5.00     |
| NM_133771                                   | Memo1         | mediator of cell motility 1                                                         | 17  | 74,600,046 | 74,694,323 | 30355                   | in gene                   | 6.00     |
| NM_152817                                   | Ttc27         | tetratricopeptide repeat domain 27                                                  | 17  | 75,117,090 | 75,262,910 | 49302                   | in gene                   | 7.00     |
| NM_019919,<br>NM_206958                     | Ltbp1         | latent transforming growth factor beta binding protein 1                            | 17  | 75,404,869 | 75,791,109 | 8571, 36347             | in gene, in gene          | 6.50     |
| NM_026514                                   | Cdc42ep3      | CDC42 effector protein (Rho GTPase binding) 3                                       | 17  | 79,733,365 | 79,754,431 | 9359                    | in gene                   | 5.00     |
| NM_201361                                   | AW061290      | expressed sequence AW061290                                                         | 17  | 80,014,240 | 80,081,492 | 400                     | in gene                   | 6.00     |
| NM_009994                                   | Cyp1b1        | cytochrome P450, family 1, subfamily b, polypeptide 1                               | 17  | 80,106,293 | 80,114,381 | -1747                   | upstream                  | 5.00     |
| NM_146083                                   | Sfrs7         | splicing factor, arginine/serine-rich 7                                             | 17  | 80,599,420 | 80,606,629 | 3301, 757               | in gene, in gene          | 5.50     |
| XM_283466,<br>XM_916685                     | 4930560E09Rik | RIKEN cDNA 4930560E09 gene                                                          | 17  | 80,615,254 | 80,617,276 | -9382                   | upstream                  | 4.00     |
| NM_009231                                   | Sos1          | Son of sevenless homolog 1 (Drosophila)                                             | 17  | 80,793,092 | 80,879,793 | 81                      | in gene                   | 5.00     |
| NM_001081357                                | Map4k3        | mitogen-activated protein kinase kinase kinase kinase 3                             | 17  | 80,979,852 | 81,127,433 | 86249                   | in gene                   | 6.00     |
| XM_001481201,<br>XM_001481202               | LOC100043900  | hypothetical protein LOC100043900                                                   | 17  | 83,497,542 | 83,520,081 | -5871                   | upstream                  | 7.00     |
| NM_011104                                   | Prkce         | protein kinase C, epsilon                                                           | 17  | 86,567,930 | 87,054,038 | 338278                  | in gene                   | 7.00     |
| NM_010137                                   | Epas1         | endothelial PAS domain protein 1                                                    | 17  | 87,153,242 | 87,230,922 | 35254                   | in gene                   | 6.00     |
| NM_180974                                   | Foxn2         | forkhead box N2                                                                     | 17  | 88,840,098 | 88,877,411 | 382                     | in gene                   | 7.00     |
| NM_001039692,<br>NM_029277                  | Arhgap12      | Rho GTPase activating protein 12                                                    | 18  | 6,024,446  | 6,136,096  | 160                     | in gene                   | 6.00     |
| NM_009280                                   | Ss18          | synovial sarcoma translocation, Chromosome 18                                       | 18  | 14,784,138 | 14,841,423 | 30895                   | in gene                   | 6.00     |
| XM_128905,<br>XM_911701                     | Taf4b         | TAF4B RNA polymerase II, TATA box binding protein (TBP)-associated factor           | 18  | 14,941,754 | 15,058,868 | -258                    | upstream                  | 5.00     |
| NM_026529                                   | 2700062C07Rik | RIKEN cDNA 2700062C07 gene                                                          | 18  | 24,629,372 | 24,636,268 | -2236                   | upstream                  | 6.00     |
| NM_175276                                   | Fhod3         | formin homology 2 domain containing 3                                               | 18  | 24,867,946 | 25,292,002 | 172950                  | in gene                   | 5.00     |
| XM_906763,<br>XM_981660                     | EG666111      | predicted gene, EG666111                                                            | 18  | 30,618,603 | 30,636,468 | -9980                   | upstream                  | 6.00     |
| XM_981691                                   | EG666114      | predicted gene, EG666114                                                            | 18  | 30,654,557 | 30,655,126 | 8678                    | downstream                | 6.00     |
| NM_028866                                   | Wdr33         | WD repeat domain 33                                                                 | 18  | 31,986,939 | 32,066,649 | 83557                   | downstream                | 8.00     |

| Accession No.                                                                                               | Symbol        | Gene Title                                                                  | Chr | Gene Start | Gene End   | Interval Dists to Start | Interval Pos       | Avg Peak |
|-------------------------------------------------------------------------------------------------------------|---------------|-----------------------------------------------------------------------------|-----|------------|------------|-------------------------|--------------------|----------|
| XM_484715,<br>XM_907118                                                                                     | Sft2d3        | SFT2 domain containing 3                                                    | 18  | 32,068,198 | 32,071,573 | 1077                    | in gene            | 8.00     |
| NM_007874                                                                                                   | Reep5         | receptor accessory protein 5                                                | 18  | 34,504,539 | 34,532,983 | -57                     | upstream           | 5.00     |
| NM_030147                                                                                                   | Brd8          | bromodomain containing 8                                                    | 18  | 34,758,269 | 34,784,464 | 13616                   | in gene            | 7.00     |
| NM_144865                                                                                                   | Reep2         | receptor accessory protein 2                                                | 18  | 35,000,312 | 35,007,109 | 9704                    | downstream         | 6.00     |
| NM_144866                                                                                                   | Etf1          | eukaryotic translation termination factor 1                                 | 18  | 35,062,439 | 35,091,657 | -215                    | upstream           | 11.00    |
| NM_001033141                                                                                                | 1110006O17Rik | RIKEN cDNA 1110006O17 gene                                                  | 18  | 35,872,743 | 35,881,145 | -7207                   | upstream           | 6.00     |
| NM_001033168                                                                                                | 1700066B19Rik | RIKEN cDNA 1700066B19 gene                                                  | 18  | 35,886,643 | 35,890,523 | 1709                    | in gene            | 6.00     |
| XM_128954,<br>XM_892499,<br>XM_900126,<br>XM_910347,<br>XM_921603,<br>XM_921606,<br>XM_986235,<br>XM_989707 | 2610307O08Rik | RIKEN cDNA 2610307O08 gene                                                  | 18  | 35,893,332 | 35,900,208 | 11856                   | downstream         | 6.00     |
| XM_984294                                                                                                   | LOC666505     | similar to 40S ribosomal protein S25                                        | 18  | 35,929,972 | 35,931,242 | 1100                    | in gene            | 8.00     |
| NM_019912                                                                                                   | Ube2d2        | ubiquitin-conjugating enzyme E2D 2                                          | 18  | 35,931,261 | 35,966,817 | -189                    | upstream           | 8.00     |
| NM_001081365                                                                                                | 0610010O12Rik | RIKEN cDNA 0610010O12 gene                                                  | 18  | 36,508,278 | 36,553,024 | 26074, 35295            | in gene, in gene   | 5.00     |
| NM_172830                                                                                                   | Slc4a9        | solute carrier family 4, sodium bicarbonate cotransporter, member 9         | 18  | 36,687,806 | 36,704,262 | 1970                    | in gene            | 5.00     |
| NM_009841                                                                                                   | Cd14          | CD14 antigen                                                                | 18  | 36,884,721 | 36,886,308 | -8644                   | upstream           | 6.00     |
| NM_028036                                                                                                   | Tmco6         | transmembrane and coiled-coil domains 6                                     | 18  | 36,894,724 | 36,902,045 | 228                     | in gene            | 6.00     |
| NM_010885                                                                                                   | Ndufa2        | NADH dehydrogenase (ubiquinone) 1 alpha subcomplex, 2                       | 18  | 36,902,020 | 36,904,202 | 9250                    | downstream         | 6.00     |
| NM_011879                                                                                                   | lk            | lK cytokine                                                                 | 18  | 36,904,370 | 36,917,289 | -9418                   | upstream           | 6.00     |
| XM_001478852                                                                                                | 1700086O06Rik | RIKEN cDNA 1700086O06 gene                                                  | 18  | 38,398,688 | 38,409,849 | -5783                   | upstream           | 7.00     |
| NM_024179                                                                                                   | 0610009O20Rik | RIKEN cDNA 0610009O20 gene                                                  | 18  | 38,409,913 | 38,422,280 | 5719                    | in gene            | 7.00     |
| NM_011937                                                                                                   | Gnpda1        | glucosamine-6-phosphate deaminase 1                                         | 18  | 38,487,209 | 38,498,605 | -35                     | upstream           | 5.00     |
| NM_022996                                                                                                   | Ndfip1        | Nedd4 family interacting protein 1                                          | 18  | 38,578,629 | 38,624,060 | -5                      | upstream           | 9.00     |
| NM_011898                                                                                                   | Spry4         | sprouty homolog 4 (Drosophila)                                              | 18  | 38,745,919 | 38,760,922 | 11882, -854             | in gene, upstream  | 5.50     |
| XR_035375                                                                                                   | 9630014M24Rik | RIKEN cDNA 9630014M24 gene                                                  | 18  | 38,761,188 | 38,805,576 | 588                     | in gene            | 6.00     |
| NM_001033789                                                                                                | EG545253      | predicted gene, EG545253                                                    | 18  | 39,052,110 | 39,130,928 | 58866                   | in gene            | 6.00     |
| NM_008173                                                                                                   | Nr3c1         | nuclear receptor subfamily 3, group C, member 1                             | 18  | 39,570,199 | 39,646,899 | -4173                   | upstream           | 7.00     |
| NM_023311                                                                                                   | Yipf5         | Yip1 domain family, member 5                                                | 18  | 40,364,519 | 40,379,053 | -51                     | upstream           | 5.00     |
| NM_172966                                                                                                   | Sh3rf2        | SH3 domain containing ring finger 2                                         | 18  | 42,213,364 | 42,318,105 | 1404                    | in gene            | 5.00     |
| NM_009468                                                                                                   | Dpysl3        | dihydropyrimidinase-like 3                                                  | 18  | 43,483,936 | 43,552,985 | -1415                   | upstream           | 6.00     |
| NM_178872                                                                                                   | Trim36        | tripartite motif-containing 36                                              | 18  | 46,325,499 | 46,372,179 | 14131                   | in gene            | 5.00     |
| XM_001479433                                                                                                | LOC100042905  | hypothetical protein LOC100042905                                           | 18  | 46,358,675 | 46,359,385 | -627                    | upstream           | 5.00     |
| NM_173423                                                                                                   | Fem1c         | fem-1 homolog c (C.elegans)                                                 | 18  | 46,664,260 | 46,685,625 | 217                     | in gene            | 7.00     |
| NM_173394                                                                                                   | Ticam2        | tol-like receptor adaptor molecule 2                                        | 18  | 46,717,885 | 46,734,186 | 346                     | in gene            | 6.00     |
| XM_001478219,<br>XM_001479574                                                                               | A730092B10    | hypothetical protein A730092B10                                             | 18  | 47,698,232 | 47,878,287 | -472                    | upstream           | 5.00     |
| NM_026408                                                                                                   | Sncaip        | synuclein, alpha interacting protein (synphilin)                            | 18  | 52,927,363 | 53,075,584 | 38621                   | in gene            | 6.00     |
| NM_175751                                                                                                   | Zfp608        | zinc finger protein 608                                                     | 18  | 55,047,702 | 55,149,567 | -865                    | upstream           | 5.00     |
| NM_177115                                                                                                   | March3        | membrane-associated ring finger (C3HC4) 3                                   | 18  | 56,921,370 | 57,085,202 | 145010                  | in gene            | 6.00     |
| XM_001001192,<br>XM_980728                                                                                  | 1700011I03Rik | RIKEN cDNA 1700011I03 gene                                                  | 18  | 57,693,434 | 57,890,721 | 70374, 197030           | in gene, in gene   | 6.50     |
| XR_035694                                                                                                   | 9330166H04Rik | RIKEN cDNA 9330166H04 gene                                                  | 18  | 58,037,369 | 58,038,257 | 1015                    | downstream         | 7.00     |
| NM_009194                                                                                                   | Slc12a2       | solute carrier family 12, member 2                                          | 18  | 58,037,369 | 58,106,475 | 1015                    | in gene            | 7.00     |
| NM_133363                                                                                                   | Myoz3         | myozenin 3                                                                  | 18  | 60,735,943 | 60,751,442 | -3454, -4398            | upstream, upstream | 6.50     |
| XM_001479956,<br>XM_001479958,<br>XM_981156                                                                 | Synpo         | synaptopodin                                                                | 18  | 60,753,627 | 60,784,227 | 29331, 28387            | in gene, in gene   | 6.50     |
| NM_009792,<br>NM_177407                                                                                     | Camk2a        | calcium/calmodulin-dependent protein kinase II alpha                        | 18  | 61,085,286 | 61,147,798 | 37754                   | in gene            | 10.00    |
| NM_201353                                                                                                   | Slc6a7        | solute carrier family 6 (neurotransmitter transporter, L-proline), member 7 | 18  | 61,155,034 | 61,173,853 | -8035                   | upstream           | 6.00     |
| NM_009880                                                                                                   | Cdx1          | caudal type homeo box 1                                                     | 18  | 61,178,519 | 61,195,853 | 13965                   | in gene            | 6.00     |
| NM_133249                                                                                                   | Ppargc1b      | peroxisome proliferative activated receptor, gamma, coactivator 1 beta      | 18  | 61,457,790 | 61,560,085 | 885                     | in gene            | 5.00     |
|                                                                                                             | Mirrn378      | microRNA 378                                                                | 18  | 61,557,488 | 61,557,553 | -1647                   | upstream           | 5.00     |
| NM_019508                                                                                                   | Il17b         | interleukin 17B                                                             | 18  | 61,847,589 | 61,852,191 | -5029                   | upstream           | 5.00     |
| NM_172628                                                                                                   | Sh3tc2        | SH3 domain and tetratricopeptide repeats 2                                  | 18  | 62,112,729 | 62,175,373 | -8393, -4249            | upstream, upstream | 7.00     |
| XM_001002365,<br>XM_984603                                                                                  | 2700046A07Rik | RIKEN cDNA 2700046A07 gene                                                  | 18  | 62,911,328 | 62,915,969 | 321                     | in gene            | 5.00     |
| NM_207255                                                                                                   | Zfp532        | zinc finger protein 532                                                     | 18  | 65,739,884 | 65,848,587 | 3316, 6916              | in gene, in gene   | 6.00     |
| NM_178793                                                                                                   | Ccbe1         | collagen and calcium binding EGF domains 1                                  | 18  | 66,216,510 | 66,451,492 | 210564                  | in gene            | 4.00     |
| NM_010307,<br>NM_177137                                                                                     | Gnal          | guanine nucleotide binding protein, alpha stimulating, olfactory type       | 18  | 67,247,990 | 67,386,446 | 116906                  | in gene            | 8.00     |
| NM_024190                                                                                                   | Chmp1b        | chromatin modifying protein 1B                                              | 18  | 67,365,077 | 67,366,655 | -181                    | upstream           | 8.00     |
| NM_176832,<br>NM_194355                                                                                     | Spire1        | spire homolog 1 (Drosophila)                                                | 18  | 67,647,863 | 67,712,375 | 52151                   | in gene            | 8.00     |
| NM_001039088,<br>NM_028112                                                                                  | Seh1l         | SEH1-like (S. cerevisiae)                                                   | 18  | 67,934,530 | 67,955,141 | 25694                   | downstream         | 7.00     |
| NM_013685                                                                                                   | Tcf4          | transcription factor 4                                                      | 18  | 69,504,175 | 69,843,998 | 317841                  | in gene            | 6.00     |
| NM_007831                                                                                                   | Dcc           | deleted in colorectal carcinoma                                             | 18  | 71,413,286 | 72,510,723 | 1052915                 | in gene            | 5.00     |
| NM_008540                                                                                                   | Smad4         | MAD homolog 4 (Drosophila)                                                  | 18  | 73,798,667 | 73,863,395 | 35939, -61              | in gene, upstream  | 7.00     |
| NM_010720                                                                                                   | Lipg          | lipase, endothelial                                                         | 18  | 75,099,017 | 75,120,760 | -9064                   | upstream           | 6.00     |

| Accession No.              | Symbol        | Gene Title                                                                     | Chr | Gene Start | Gene End   | Interval Dists to Start | Interval Pos                 | Avg Peak |
|----------------------------|---------------|--------------------------------------------------------------------------------|-----|------------|------------|-------------------------|------------------------------|----------|
| NM_001002239               | Rpl17         | ribosomal protein L17                                                          | 18  | 75,160,176 | 75,163,034 | 5264                    | downstream                   | 8.00     |
| NM_001001181               | BC031181      | cDNA sequence BC031181                                                         | 18  | 75,165,554 | 75,169,587 | -114                    | upstream                     | 8.00     |
| NM_027727                  | Dym           | dymeclin                                                                       | 18  | 75,178,426 | 75,446,620 | 121094, 197206          | in gene, in gene             | 6.50     |
| NM_001042660               | Smad7         | MAD homolog 7 (Drosophila)                                                     | 18  | 75,527,019 | 75,555,588 | 24928                   | in gene                      | 5.00     |
| NM_201354                  | Gm672         | gene model 672, (NCBI)                                                         | 18  | 75,590,859 | 75,857,208 | 269976, 142520, 101368  | downstream, in gene, in gene | 5.67     |
| NM_016791,<br>NM_198429    | Nfatc1        | nuclear factor of activated T-cells, cytoplasmic, calcineurin-dependent 1      | 18  | 80,802,944 | 80,909,797 | 88213                   | in gene                      | 6.00     |
| NM_183033                  | Zfp516        | zinc finger protein 516                                                        | 18  | 83,125,011 | 83,172,115 | -1603                   | upstream                     | 6.00     |
| XM_976217,<br>XM_991500    | Zfp407        | zinc finger protein 407                                                        | 18  | 84,377,093 | 84,758,896 | -240                    | upstream                     | 4.00     |
| NM_023149                  | Cndp2         | CNDP dipeptidase 2 (metallopeptidase M20 family)                               | 18  | 84,836,861 | 84,855,025 | -175                    | upstream                     | 4.00     |
| XM_001473368               | LOC100039711  | hypothetical protein LOC100039711                                              | 18  | 84,853,350 | 84,857,083 | 1883                    | in gene                      | 4.00     |
| NM_013495                  | Cpt1a         | carnitine palmitoyltransferase 1a, liver                                       | 19  | 3,323,348  | 3,385,732  | 172                     | in gene                      | 6.00     |
| NM_029456                  | Saps3         | SAPS domain family, member 3                                                   | 19  | 3,454,928  | 3,575,720  | -504                    | upstream                     | 7.00     |
| XM_001480817               | LOC100043581  | hypothetical protein LOC100043581                                              | 19  | 3,573,969  | 3,575,718  | 2255                    | downstream                   | 7.00     |
| NM_144871                  | Suv420h1      | suppressor of variegation 4-20 homolog 1 (Drosophila)                          | 19  | 3,767,421  | 3,816,391  | 1283                    | in gene                      | 7.00     |
| NM_026316                  | Aldh3b1       | aldehyde dehydrogenase 3 family, member B1                                     | 19  | 3,913,491  | 3,929,716  | -6412                   | upstream                     | 5.00     |
| NM_019449                  | Unc93b1       | unc-93 homolog B1 (C. elegans)                                                 | 19  | 3,935,219  | 3,949,340  | 909                     | in gene                      | 5.00     |
| NM_008851                  | Pitpm1        | phosphatidylinositol membrane-associated 1                                     | 19  | 4,100,622  | 4,113,961  | 13938                   | downstream                   | 6.00     |
| NM_001078649,<br>NM_025889 | Tmem134       | transmembrane protein 134                                                      | 19  | 4,125,960  | 4,132,307  | 88                      | in gene                      | 4.00     |
| NM_144532                  | Cabp4         | calcium binding protein 4                                                      | 19  | 4,135,423  | 4,139,609  | 13561, -7543            | downstream, upstream         | 4.00     |
| NM_206973                  | Gpr152        | G protein-coupled receptor 152                                                 | 19  | 4,139,799  | 4,145,741  | 7353                    | downstream                   | 4.00     |
| NM_011778                  | Coro1b        | coronin, actin binding protein 1B                                              | 19  | 4,148,663  | 4,154,035  | -1511                   | upstream                     | 4.00     |
| NM_016933                  | Ptprcap       | protein tyrosine phosphatase, receptor type, C polypeptide-associated protein  | 19  | 4,154,646  | 4,156,710  | -7494                   | upstream                     | 4.00     |
| NM_198113                  | Ssh3          | slingshot homolog 3 (Drosophila)                                               | 19  | 4,261,668  | 4,269,172  | 5460                    | in gene                      | 7.00     |
| NM_026720                  | Ankrd13d      | ankyrin repeat domain 13 family, member D                                      | 19  | 4,270,180  | 4,283,137  | 19425                   | downstream                   | 7.00     |
| NM_008797                  | Pcx           | pyruvate carboxylase                                                           | 19  | 4,594,346  | 4,621,698  | 20422                   | in gene                      | 6.00     |
| NM_153388                  | Lrfn4         | leucine rich repeat and fibronectin type III domain containing 4               | 19  | 4,611,792  | 4,615,502  | 734                     | in gene                      | 6.00     |
| NM_023131                  | Rce1          | RCE1 homolog, prenyl protein peptidase (S. cerevisiae)                         | 19  | 4,622,551  | 4,625,617  | 10849                   | downstream                   | 6.00     |
| NM_009032                  | Rbm4          | RNA binding motif protein 4                                                    | 19  | 4,784,293  | 4,793,877  | 5893, -8619             | in gene, upstream            | 5.00     |
| NM_019869                  | Rbm14         | RNA binding motif protein 14                                                   | 19  | 4,800,925  | 4,811,634  | 9138                    | in gene                      | 4.00     |
| NM_016892                  | Ccs           | copper chaperone for superoxide dismutase                                      | 19  | 4,825,366  | 4,839,322  | -70                     | upstream                     | 6.00     |
| NM_207268                  | Ccdc87        | coiled-coil domain containing 87                                               | 19  | 4,839,415  | 4,842,163  | -23                     | upstream                     | 6.00     |
| NM_153553                  | Npas4         | neuronal PAS domain protein 4                                                  | 19  | 4,984,355  | 4,989,971  | 11731                   | downstream                   | 7.00     |
| NM_016882                  | Sart1         | squamous cell carcinoma antigen recognized by T-cells 1                        | 19  | 5,377,523  | 5,388,703  | 95                      | in gene                      | 5.00     |
| XR_031843,<br>XR_034927    | Tsga10ip      | testis specific 10 interacting protein                                         | 19  | 5,390,046  | 5,402,460  | 13852                   | downstream                   | 5.00     |
| NM_021474                  | Efemp2        | epidermal growth factor-containing fibulin-like extracellular matrix protein 2 | 19  | 5,474,750  | 5,481,853  | 14338                   | downstream                   | 7.00     |
| NM_027877                  | Mus81         | MUS81 endonuclease homolog (yeast)                                             | 19  | 5,482,851  | 5,488,341  | -747                    | upstream                     | 7.00     |
| NM_007687                  | Cfl1          | cofilin 1, non-muscle                                                          | 19  | 5,490,525  | 5,495,201  | -1437                   | upstream                     | 7.00     |
| NM_001024560               | B930037P14Rik | RIKEN cDNA B930037P14 gene                                                     | 19  | 5,495,278  | 5,510,489  | 21401, -4359            | downstream, upstream         | 8.00     |
| NM_019935                  | Ovo1          | OVO homolog-like 1 (Drosophila)                                                | 19  | 5,549,137  | 5,560,575  | -7105, -7585            | upstream, upstream           | 6.50     |
| NM_001033448               | Gm962         | gene model 962, (NCBI)                                                         | 19  | 5,568,074  | 5,571,261  | -394, 86                | upstream, in gene            | 6.50     |
| NM_009045                  | Rela          | v-rel reticuloendotheliosis viral oncogene homolog A (avian)                   | 19  | 5,637,490  | 5,648,130  | 9646                    | in gene                      | 5.00     |
| NM_011379                  | Sipa1         | signal-induced proliferation associated gene 1                                 | 19  | 5,651,194  | 5,663,620  | 16484                   | downstream                   | 5.00     |
| NM_022012                  | Map3k11       | mitogen activated protein kinase kinase kinase 11                              | 19  | 5,689,131  | 5,702,865  | 10213                   | in gene                      | 5.00     |
| NM_001004138,<br>NM_010609 | Kcnk7         | potassium channel, subfamily K, member 7                                       | 19  | 5,704,476  | 5,707,101  | -5132                   | upstream                     | 5.00     |
| NM_053252                  | Ehbp111       | EH domain binding protein 1-like 1                                             | 19  | 5,707,891  | 5,726,317  | 26973                   | downstream                   | 5.00     |
| XR_035481,<br>XR_035482    | 2310043N10Rik | RIKEN cDNA 2310043N10 gene                                                     | 19  | 5,796,401  | 5,845,579  | 21743                   | in gene                      | 5.00     |
| XM_886988,<br>XM_906412    | LOC622554     | hypothetical LOC622554                                                         | 19  | 6,195,680  | 6,223,566  | 16256, 31360            | in gene, downstream          | 5.00     |
| NM_130453                  | Gpha2         | glycoprotein hormone alpha 2                                                   | 19  | 6,226,401  | 6,227,768  | 639                     | in gene                      | 6.00     |
| NM_198168                  | Ppp2r5b       | protein phosphatase 2, regulatory subunit B (B56), beta isoform                | 19  | 6,227,767  | 6,235,840  | 8800                    | downstream                   | 6.00     |
| NM_010119                  | Ehd1          | EH-domain containing 1                                                         | 19  | 6,276,896  | 6,300,096  | 30827                   | downstream                   | 4.00     |
| XM_140553,<br>XM_906449    | Cdc42bpg      | CDC42 binding protein kinase gamma (DMPK-like)                                 | 19  | 6,306,448  | 6,325,177  | 1275                    | in gene                      | 4.00     |
| NM_020253                  | Nrxn2         | neurexin II                                                                    | 19  | 6,428,016  | 6,533,217  | 81872                   | in gene                      | 5.00     |
| NM_019924                  | Rps6ka4       | ribosomal protein S6 kinase, polypeptide 4                                     | 19  | 6,903,574  | 6,915,091  | -269                    | upstream                     | 5.00     |
| NM_001081291               | Ccdc88        | coiled-coil domain containing 88                                               | 19  | 6,919,113  | 6,932,701  | 17341                   | downstream                   | 5.00     |
| NM_007953                  | Esrra         | estrogen related receptor, alpha                                               | 19  | 6,985,467  | 6,996,298  | -1142                   | upstream                     | 7.00     |
| NM_001039494               | 1700019N12Rik | RIKEN cDNA 1700019N12 gene                                                     | 19  | 6,996,916  | 6,999,870  | 2430, -8418             | in gene, upstream            | 6.50     |
| NM_008431                  | Kcnk4         | potassium channel, subfamily K, member 4                                       | 19  | 7,000,180  | 7,009,005  | 11565, 717              | downstream, in gene          | 6.50     |
| NM_207220                  | Gpr137        | G protein-coupled receptor 137                                                 | 19  | 7,012,560  | 7,015,969  | 7681                    | downstream                   | 6.00     |

| Accession No.                                                              | Symbol        | Gene Title                                                             | Chr | Gene Start | Gene End   | Interval Dists to Start | Interval Pos                 | Avg Peak |
|----------------------------------------------------------------------------|---------------|------------------------------------------------------------------------|-----|------------|------------|-------------------------|------------------------------|----------|
| NM_007522                                                                  | Bad           | Bcl-associated death promoter                                          | 19  | 7,016,345  | 7,026,383  | -8057                   | upstream                     | 6.00     |
| NM_134147                                                                  | D930010J01Rik | RIKEN cDNA D930010J01 gene                                             | 19  | 7,131,300  | 7,272,547  | 12908                   | in gene                      | 6.00     |
| NM_146093                                                                  | D19Erd721e    | DNA segment, Chr 19, ERATO Doi 721, expressed                          | 19  | 8,946,049  | 8,950,146  | 9407                    | downstream                   | 7.00     |
| XM_887080,<br>XM_907845                                                    | AI462493      | expressed sequence AI462493                                            | 19  | 8,954,504  | 8,955,423  | -33                     | upstream                     | 7.00     |
| NM_025463                                                                  | 1810009A15Rik | RIKEN cDNA 1810009A15 gene                                             | 19  | 8,963,393  | 8,965,230  | -7937, 9215             | upstream,<br>downstream      | 7.50     |
| NM_176843                                                                  | Ints5         | integrator complex subunit 5                                           | 19  | 8,967,495  | 8,972,378  | 5113                    | downstream                   | 8.00     |
| NM_008060                                                                  | Ganab         | alpha glucosidase 2 alpha neutral subunit                              | 19  | 8,972,601  | 8,991,156  | 7                       | in gene                      | 8.00     |
| NM_010239                                                                  | Fth1          | ferritin heavy chain 1                                                 | 19  | 10,057,193 | 10,059,582 | 172                     | in gene                      | 7.00     |
| NM_011913                                                                  | Best1         | bestrophin 1                                                           | 19  | 10,059,664 | 10,071,704 | 14339                   | downstream                   | 7.00     |
| NM_018801,<br>NM_173067,<br>NM_173068                                      | Syt7          | synaptotagmin VII                                                      | 19  | 10,463,973 | 10,522,934 | -725                    | upstream                     | 5.00     |
| NM_001037801,<br>NM_009852                                                 | Cd6           | CD6 antigen                                                            | 19  | 10,863,829 | 10,904,548 | 12260                   | in gene                      | 6.00     |
| XM_888885,<br>XM_908564                                                    | AW112010      | expressed sequence AW112010                                            | 19  | 11,122,102 | 11,125,056 | 5664                    | downstream                   | 4.00     |
| NM_008139                                                                  | Gnaq          | guanine nucleotide binding protein, alpha q polypeptide                | 19  | 16,207,321 | 16,461,943 | 261879                  | downstream                   | 5.00     |
| XM_001477736                                                               | LOC100042193  | hypothetical protein LOC100042193                                      | 19  | 18,742,735 | 18,745,272 | 2481                    | in gene                      | 6.00     |
| NM_026120                                                                  | 2410127L17Rik | RIKEN cDNA 2410127L17 gene                                             | 19  | 18,745,270 | 18,779,282 | -54                     | upstream                     | 6.00     |
| NM_001033759,<br>NM_031997                                                 | Tmem2         | transmembrane protein 2                                                | 19  | 21,852,832 | 21,932,817 | 52256                   | in gene                      | 5.00     |
| NM_010638                                                                  | Klf9          | Kruppel-like factor 9                                                  | 19  | 23,215,716 | 23,241,401 | -7012, -6084            | upstream, upstream           | 9.00     |
| NM_198651                                                                  | 443040218Rik  | RIKEN cDNA 443040218 gene                                              | 19  | 28,997,554 | 29,038,644 | -4172                   | upstream                     | 7.00     |
| NM_021299                                                                  | Ak3           | adenylate kinase 3                                                     | 19  | 29,095,322 | 29,122,392 | -5267                   | upstream                     | 5.00     |
| XR_035347,<br>XR_035355                                                    | 2700046G09Rik | RIKEN cDNA 2700046G09 gene                                             | 19  | 32,463,697 | 32,465,674 | -1553                   | upstream                     | 5.00     |
| NM_008960                                                                  | Pten          | phosphatase and tensin homolog                                         | 19  | 32,832,067 | 32,900,650 | -1219                   | upstream                     | 7.00     |
| NM_198300                                                                  | Cpeb3         | cytoplasmic polyadenylation element binding protein 3                  | 19  | 37,095,781 | 37,281,783 | 175543                  | in gene                      | 7.00     |
| NM_001034962,<br>NM_001034963,<br>NM_001034964,<br>NM_009166,<br>NM_178362 | Sorbs1        | sorbin and SH3 domain containing 1                                     | 19  | 40,366,530 | 40,588,302 | 108478                  | in gene                      | 6.00     |
| XM_001000855,<br>XM_994273                                                 | E130314M14Rik | RIKEN cDNA E130314M14 gene                                             | 19  | 40,969,177 | 40,972,881 | 3825                    | downstream                   | 5.00     |
| NM_028319                                                                  | Zfp518        | zinc finger protein 518                                                | 19  | 40,969,195 | 40,992,437 | -139                    | upstream                     | 5.00     |
| NM_015748                                                                  | Slit1         | slit homolog 1 (Drosophila)                                            | 19  | 41,674,749 | 41,818,346 | 68058, 52906, 25658     | in gene, in gene, in<br>gene | 5.67     |
| NM_145501                                                                  | Pi4k2a        | phosphatidylinositol 4-kinase type 2 alpha                             | 19  | 42,164,925 | 42,196,708 | 307                     | in gene                      | 6.00     |
| XR_035382,<br>XR_035422                                                    | Marveld1      | MARVEL (membrane-associating) domain containing 1                      | 19  | 42,221,879 | 42,224,737 | -2695                   | upstream                     | 8.00     |
| NM_027694                                                                  | 4933417O08Rik | RIKEN cDNA 4933417O08 gene                                             | 19  | 42,330,273 | 42,344,838 | 14895                   | downstream                   | 5.00     |
| NM_145123                                                                  | Crtac1        | cartilage acidic protein 1                                             | 19  | 42,357,527 | 42,506,273 | 133153                  | in gene                      | 5.00     |
| NM_145156                                                                  | Slc25a28      | solute carrier family 25, member 28                                    | 19  | 43,738,291 | 43,749,371 | -149, -549              | upstream, upstream           | 6.00     |
| NM_053197                                                                  | Sfxn3         | sideroflexin 3                                                         | 19  | 45,122,164 | 45,130,872 | 18172                   | downstream                   | 6.00     |
| NM_178929                                                                  | Kazal1        | kazal-type serine peptidase inhibitor domain 1                         | 19  | 45,150,629 | 45,153,772 | -1114                   | upstream                     | 5.00     |
| NM_001037758,<br>NM_009771                                                 | Btrc          | beta-transducin repeat containing protein                              | 19  | 45,430,387 | 45,604,503 | 174093                  | in gene                      | 5.00     |
| NM_198296                                                                  | 9130011E15Rik | RIKEN cDNA 9130011E15 gene                                             | 19  | 45,892,634 | 46,072,978 | 26290, -142             | in gene, upstream            | 5.00     |
| XM_001000740,<br>XM_001001649,<br>XM_973308                                | 4930505N22Rik | RIKEN cDNA 4930505N22 gene                                             | 19  | 46,072,313 | 46,073,124 | 4                       | in gene                      | 6.00     |
| NM_176785                                                                  | Hps6          | Hermansky-Pudlak syndrome 6                                            | 19  | 46,077,998 | 46,080,643 | -4878                   | upstream                     | 6.00     |
| NM_001025391,<br>NM_015752                                                 | Sufu          | suppressor of fused homolog (Drosophila)                               | 19  | 46,471,408 | 46,561,150 | 81936                   | in gene                      | 5.00     |
| NM_146099                                                                  | D19Wsu162e    | DNA segment, Chr 19, Wayne State University 162, expressed             | 19  | 46,673,641 | 46,731,874 | 33831                   | in gene                      | 6.00     |
| NM_007809                                                                  | Cyp17a1       | cytochrome P450, family 17, subfamily a, polypeptide 1                 | 19  | 46,741,670 | 46,747,464 | 4328                    | in gene                      | 6.00     |
| NM_021360                                                                  | Neurl         | neuralized-like homolog (Drosophila)                                   | 19  | 47,253,310 | 47,333,931 | 33314, 85698            | in gene, downstream          | 6.00     |
| NM_177833                                                                  | EG329070      | predicted gene, EG329070                                               | 19  | 47,336,657 | 47,339,548 | 2351                    | in gene                      | 6.00     |
| NM_175360                                                                  | Obfc1         | oligonucleotide/oligosaccharide-binding fold containing 1              | 19  | 47,575,538 | 47,611,510 | 20870                   | in gene                      | 6.00     |
| NM_007732                                                                  | Col17a1       | procollagen, type XVII, alpha 1                                        | 19  | 47,720,852 | 47,766,584 | 14712                   | in gene                      | 4.00     |
| NM_007790                                                                  | Smc3          | structural maintenance of chromosomes 3                                | 19  | 53,674,937 | 53,719,638 | 49415                   | downstream                   | 6.00     |
| XM_001002314,<br>XM_001481268                                              | Rbm20         | RNA binding motif protein 20                                           | 19  | 53,751,796 | 53,940,203 | 176092                  | in gene                      | 6.00     |
| NM_009348                                                                  | Tectb         | tectorin beta                                                          | 19  | 55,255,375 | 55,270,803 | 4753                    | in gene                      | 5.00     |
| NM_001081076                                                               | Gucy2g        | guanylate cyclase 2g                                                   | 19  | 55,272,591 | 55,315,726 | -3906                   | upstream                     | 5.00     |
| NM_027976                                                                  | Acsf5         | acyl-CoA synthetase long-chain family member 5                         | 19  | 55,327,859 | 55,371,118 | -8227, -275             | upstream, upstream           | 4.50     |
| NM_016862                                                                  | Vti1a         | vesicle transport through interaction with t-SNAREs homolog 1A (yeast) | 19  | 55,390,841 | 55,701,051 | 85959                   | in gene                      | 5.00     |
| NM_009333                                                                  | Tcf7l2        | transcription factor 7-like 2, T-cell specific, HMG-box                | 19  | 55,816,759 | 56,007,732 | 2089, 26105             | in gene, in gene             | 4.50     |

| Accession No.                                       | Symbol       | Gene Title                                                            | Chr | Gene Start  | Gene End    | Interval Dists to Start                        | Interval Pos                                                  | Avg Peak |
|-----------------------------------------------------|--------------|-----------------------------------------------------------------------|-----|-------------|-------------|------------------------------------------------|---------------------------------------------------------------|----------|
| NM_018831                                           | Dclre1a      | DNA cross-link repair 1A, PSO2 homolog (S. cerevisiae)                | 19  | 56,603,651  | 56,622,516  | 3460                                           | in gene                                                       | 5.00     |
| NM_025811                                           | Nhlrc2       | NHL repeat containing 2                                               | 19  | 56,622,751  | 56,673,336  | -3695                                          | upstream                                                      | 5.00     |
| NM_178688                                           | Ablim1       | actin-binding LIM protein 1                                           | 19  | 57,111,630  | 57,290,522  | 184218, 146330                                 | downstream, in gene                                           | 5.50     |
| NR_002863                                           | Emx2os       | empty spiracles homolog 2 (Drosophila) opposite strand                | 19  | 59,499,594  | 59,533,125  | 22517                                          | in gene                                                       | 7.00     |
| NM_010123                                           | Eif3s10      | eukaryotic translation initiation factor 3, subunit 10 (theta)        | 19  | 60,837,025  | 60,866,546  | 194                                            | in gene                                                       | 6.00     |
| NM_018869                                           | Gprk5        | G protein-coupled receptor kinase 5                                   | 19  | 60,966,379  | 61,168,245  | -603                                           | upstream                                                      | 6.00     |
| NM_008423                                           | Kcnd1        | potassium voltage-gated channel, Shal-related family, member 1        | X   | 7,400,969   | 7,413,629   | 17559                                          | downstream                                                    | 6.00     |
| NM_138604                                           | Otud5        | OTU domain containing 5                                               | X   | 7,418,957   | 7,451,986   | -429                                           | upstream                                                      | 6.00     |
| NM_016697                                           | Gpc3         | glypican 3                                                            | X   | 49,625,603  | 49,967,098  | 160370                                         | in gene                                                       | 4.00     |
| XM_001473214                                        | LOC100039621 | hypothetical protein LOC100039621                                     | X   | 57,736,736  | 57,811,637  | 64256                                          | in gene                                                       | 5.00     |
| XM_205232, XM_993146                                | Gm715        | gene model 715, (NCBI)                                                | X   | 57,801,194  | 57,802,392  | -202                                           | upstream                                                      | 5.00     |
| NM_019870                                           | Ard1         | N-acetyltransferase ARD1 homolog (S. cerevisiae)                      | X   | 71,162,214  | 71,167,252  | -12                                            | upstream                                                      | 6.00     |
| NM_023132                                           | Renbp        | renin binding protein                                                 | X   | 71,167,461  | 71,176,157  | 8893                                           | downstream                                                    | 6.00     |
| NM_001039059, NM_001039060, NM_001039061, NM_153165 | Klhl15       | kelch-like 15 (Drosophila)                                            | X   | 91,480,269  | 91,518,854  | -397                                           | upstream                                                      | 6.00     |
| NM_010099                                           | Eda          | ectodysplasin-A                                                       | X   | 97,170,945  | 97,596,099  | 165919                                         | in gene                                                       | 7.00     |
| NM_009910                                           | Cxcr3        | chemokine (C-X-C motif) receptor 3                                    | X   | 98,926,875  | 98,929,486  | -3842                                          | upstream                                                      | 4.00     |
| NM_008828                                           | Pgk1         | phosphoglycerate kinase 1                                             | X   | 103,382,463 | 103,399,038 | 9281                                           | in gene                                                       | 6.00     |
| NM_008001                                           | Fgd1         | FYVE, RhoGEF and PH domain containing 1                               | X   | 147,481,776 | 147,523,642 | -240                                           | upstream                                                      | 4.00     |
| NM_025660                                           | Ribc1        | RIB43A domain with coiled-coils 1                                     | X   | 148,439,125 | 148,450,838 | -607                                           | upstream                                                      | 4.00     |
| NM_019710                                           | Smc1a        | structural maintenance of chromosomes 1A                              | X   | 148,450,971 | 148,496,510 | 474                                            | in gene                                                       | 4.00     |
| NM_198409                                           | Rai2         | retinoic acid induced 2                                               | X   | 158,155,559 | 158,217,425 | 29465                                          | in gene                                                       | 6.00     |
| NM_009453, NM_178794                                | Zrsr2        | zinc finger (CCCH type), RNA binding motif and serine/arginine rich 2 | X   | 160,373,375 | 160,396,530 | -14                                            | upstream                                                      | 7.00     |
| NM_029730                                           | Mospd2       | motile sperm domain containing 2                                      | X   | 161,398,850 | 161,418,257 | 33                                             | in gene                                                       | 6.00     |
| NM_175027                                           | Fancb        | Fanconi anemia, complementation group B                               | X   | 161,418,645 | 161,435,204 | -421                                           | upstream                                                      | 6.00     |
| NM_177429                                           | Ofd1         | oral-facial-digital syndrome 1 gene homolog (human)                   | X   | 162,828,868 | 162,878,487 | -121                                           | upstream                                                      | 5.00     |
| NM_025432                                           | Trappc2      | trafficking protein particle complex 2                                | X   | 162,878,733 | 162,891,070 | -125                                           | upstream                                                      | 5.00     |
| NM_009707, NM_178754                                | Arhgap6      | Rho GTPase activating protein 6                                       | X   | 165,233,031 | 165,742,367 | 241753                                         | in gene                                                       | 7.00     |
| NM_010797, NM_183151                                | Mid1         | midline 1                                                             | X   | 166,123,179 | 166,428,730 | 301813, 304229, 305109, 307253, 310709, 312533 | in gene, in gene, in gene, downstream, downstream, downstream | 12.83    |

**Table S2. Differently expressed genes in the mutant mice**

| Probe set    | Accession No. | Symbol        | Gene Title                                         | Fold Change |
|--------------|---------------|---------------|----------------------------------------------------|-------------|
| 1415777_at   | NM_018874     | Pnliprp1      | pancreatic lipase related protein 1                | 104.07      |
| 1454866_s_at | NM_172469     | Clic6         | chloride intracellular channel 6                   | 62.35       |
| 1451857_a_at | NM_175263     | Notum         | notum pectinacetylerase homolog (Drosophila)       | 59.36       |
| 1457021_x_at | NM_144547     | Amhr2         | anti-Mullerian hormone type 2 receptor             | 51.94       |
| 1438967_x_at | NM_144547     | Amhr2         | anti-Mullerian hormone type 2 receptor             | 47.77       |
| 1437438_x_at | NM_011128     | Pnliprp2      | pancreatic lipase-related protein 2                | 43.35       |
| 1448186_at   | NM_011128     | Pnliprp2      | pancreatic lipase-related protein 2                | 42.96       |
| 1429647_at   | XM_487606     | 1700027L20Rik | RIKEN cDNA 1700027L20 gene                         | 38.92       |
| 1449254_at   | NM_009263     | Spp1          | secreted phosphoprotein 1                          | 37.70       |
| 1422867_at   | NM_010375     | Gzmg          | granzyme G                                         | 37.03       |
| 1420344_x_at | NM_010372     | Gzmd          | granzyme D                                         | 36.40       |
| 1460465_at   | NM_172399     | A930038C07Rik | RIKEN cDNA A930038C07 gene                         | 34.12       |
| 1427989_at   | NM_144547     | Amhr2         | anti-Mullerian hormone type 2 receptor             | 32.11       |
| 1454159_a_at | NM_008342     | Igfbp2        | insulin-like growth factor binding protein 2       | 31.65       |
| 1429076_a_at | NM_023608     | Gdpd2         | glycerophosphodiester phosphodiesterase            | 28.91       |
| 1436503_at   | NM_001001179  | BC048546      | cDNA sequence BC048546                             | 28.03       |
| 1420343_at   | NM_010372     | Gzmd          | granzyme D                                         | 26.43       |
| 1449500_at   | NM_027548     | Serpib7       | serine (or cysteine) peptidase inhibitor, clade B, | 23.91       |
| 1419015_at   | NM_016873     | Wisp2         | WNT1 inducible signaling pathway protein 2         | 23.21       |
| 1436869_at   | NM_009170     | Shh           | sonic hedgehog                                     | 22.20       |
| 1421227_at   | NM_010372     | Gzmd /// Gzme | granzyme D /// granzyme E                          | 20.38       |
| 1424265_at   | NM_028749     | Npl           | N-acetylneuraminate pyruvate lyase                 | 19.78       |
| 1448955_s_at | NM_001042617  | Cadps         | Ca <sup>2+</sup> -dependent secretion activator    | 19.30       |
| 1425425_a_at | NM_011915     | Wif1          | Wnt inhibitory factor 1                            | 18.13       |
| 1419072_at   | NM_026672     | Gstm7         | glutathione S-transferase, mu 7                    | 15.11       |
| 1434165_at   | NM_172469     | Clic6         | chloride intracellular channel 6                   | 14.07       |
| 1450171_x_at | NM_010373     | Gzme          | granzyme E                                         | 13.59       |
| 1417676_a_at | NM_001164401  | Ptpro         | protein tyrosine phosphatase, receptor type, O     | 13.44       |
| 1418679_at   | NM_010374     | Gzmf          | granzyme F                                         | 12.59       |
| 1428987_at   | NM_029297     | Dynlrb2       | dynein light chain roadblock-type 2                | 12.48       |
| 1415938_at   | NM_009258     | Spink3        | serine peptidase inhibitor, Kazal type 3           | 12.46       |
| 1429841_at   | NM_001001979  | Megf10        | multiple EGF-like-domains 10                       | 12.28       |
| 1422177_at   | NM_008356     | Il13ra2       | interleukin 13 receptor, alpha 2                   | 12.17       |
| 1435999_at   | NM_183136     | Spink8        | serine peptidase inhibitor, Kazal type 8           | 12.00       |
| 1422667_at   | NM_008469     | Krt15         | keratin 15                                         | 11.60       |
| 1443322_at   | AV328597      | ---           |                                                    | 11.53       |
| 1436368_at   | NM_001114332  | Slc16a10      | solute carrier family 16 (monocarboxylic acid      | 11.21       |
| 1427247_at   | NM_177664     | D3Bwg0562e    | DNA segment, Chr 3, Brigham & Women's              | 10.53       |
| 1434539_at   | NM_010733     | Lrrn3         | leucine rich repeat protein 3, neuronal            | 10.47       |
| 1453645_at   | XM_001002365  | 2700046A07Rik | RIKEN cDNA 2700046A07 gene                         | 10.42       |
| 1423569_at   | NM_025961     | Gatm          | glycine amidinotransferase (L-arginine:glycine     | 10.08       |
| 1443639_at   | NM_133237     | Apcdd1        | Adenomatosis polyposis coli down-regulated 1       | 9.90        |
| 1419332_at   | NM_019397     | Egfl6         | EGF-like-domain, multiple 6                        | 9.09        |
| 1450770_at   | NM_026142     | 3632451O06Rik | RIKEN cDNA 3632451O06 gene                         | 8.65        |

| Probe set    | Accession No. | Symbol        | Gene Title                                          | Fold Change |
|--------------|---------------|---------------|-----------------------------------------------------|-------------|
| 1419719_at   | NM_008069     | Gabbr1        | gamma-aminobutyric acid (GABA) A receptor,          | 8.64        |
| 1456509_at   | NM_001167996  | 1110032F04Rik | RIKEN cDNA 1110032F04 gene                          | 8.54        |
| 1440374_at   | NM_001025568  | Pde1c         | phosphodiesterase 1C                                | 8.18        |
| 1427257_at   | NM_001081249  | Vcan          | versican                                            | 8.13        |
| 1417343_at   | NM_022004     | Fxyd6         | FXYD domain-containing ion transport regulator      | 8.02        |
| 1451796_s_at | NM_008230     | Hdc           | histidine decarboxylase                             | 7.87        |
| 1421262_at   | NM_010720     | Lipg          | lipase, endothelial                                 | 7.79        |
| 1424556_at   | NM_144795     | Pycr1         | pyrroline-5-carboxylate reductase 1                 | 7.75        |
| 1454713_s_at | NM_008230     | Hdc           | histidine decarboxylase                             | 7.72        |
| 1429506_at   | NM_001163660  | Nkd1          | naked cuticle 1 homolog (Drosophila)                | 7.69        |
| 1421679_a_at | NM_001111099  | Cdkn1a        | cyclin-dependent kinase inhibitor 1A (P21)          | 7.64        |
| 1421694_a_at | NM_001081249  | Vcan          | versican                                            | 7.58        |
| 1416200_at   | NM_001164724  | Il33          | interleukin 33                                      | 7.51        |
| 1436987_at   | NM_001126490  | Ism1          | isthmin 1 homolog (zebrafish)                       | 7.36        |
| 1435095_at   | BE980202      | C030009O12Rik | RIKEN cDNA C030009O12 gene                          | 7.21        |
| 1422941_at   | NM_053116     | Wnt16         | wingless-related MMTV integration site 16           | 7.05        |
| 1422592_at   | NM_008729     | Ctnnd2        | catenin (cadherin associated protein), delta 2      | 7.03        |
| 1438602_s_at | NM_008555     | Masp1         | mannan-binding lectin serine peptidase 1            | 6.97        |
| 1434592_at   | NM_001114332  | Slc16a10      | solute carrier family 16 (monocarboxylic acid       | 6.96        |
| 1457423_at   | NM_177393     | Nalcn         | sodium leak channel, non-selective                  | 6.90        |
| 1449451_at   | NM_025867     | Serpib11      | serine (or cysteine) peptidase inhibitor, clade B   | 6.87        |
| 1417898_a_at | NM_010370     | Gzma          | granzyme A                                          | 6.76        |
| 1422914_at   | NM_022435     | Sp5           | trans-acting transcription factor 5                 | 6.63        |
| 1430118_at   | XM_001002365  | 2700046A07Rik | RIKEN cDNA 2700046A07 gene                          | 6.60        |
| 1431839_a_at | NM_001162979  | Ccdc81        | coiled-coil domain containing 81                    | 6.57        |
| 1425046_at   | NM_144890     | BC018465      | cDNA sequence BC018465                              | 6.46        |
| 1438698_at   | NM_175432     | Tmem132c      | transmembrane protein 132C                          | 6.39        |
| 1418383_at   | NM_133237     | Apcdd1        | adenomatosis polyposis coli down-regulated 1        | 6.35        |
| 1418457_at   | NM_019568     | Cxcl14        | chemokine (C-X-C motif) ligand 14                   | 6.31        |
| 1418003_at   | NM_025427     | 1190002H23Rik | RIKEN cDNA 1190002H23 gene                          | 6.24        |
| 1450377_at   | NM_011580     | Thbs1         | thrombospondin 1                                    | 6.21        |
| 1436845_at   | NM_015732     | Axin2         | axin2                                               | 6.11        |
| 1438511_a_at | NM_025427     | 1190002H23Rik | RIKEN cDNA 1190002H23 gene                          | 6.11        |
| 1450188_s_at | NM_010720     | Lipg          | lipase, endothelial                                 | 6.06        |
| 1416342_at   | NM_011607     | Tnc           | tenascin C                                          | 6.03        |
| 1450704_at   | NM_010544     | Ihh           | Indian hedgehog                                     | 5.98        |
| 1431844_at   | NM_028231     | Kcnmb2        | potassium large conductance calcium-activated       | 5.85        |
| 1425985_s_at | NM_008555     | Masp1         | mannan-binding lectin serine peptidase 1            | 5.84        |
| 1427256_at   | NM_001081249  | Vcan          | versican                                            | 5.77        |
| 1460302_at   | NM_011580     | Thbs1         | thrombospondin 1                                    | 5.72        |
| 1427339_at   | NM_001039677  | Slc30a2       | solute carrier family 30 (zinc transporter), member | 5.72        |
| 1440617_at   | NM_177834     | Cpa6          | carboxypeptidase A6                                 | 5.69        |
| 1434292_at   | NM_175692     | Snhg11        | small nucleolar RNA host gene 11                    | 5.67        |
| 1449286_at   | NM_001163348  | Ntng1         | netrin G1                                           | 5.65        |
| 1418382_at   | NM_133237     | Apcdd1        | adenomatosis polyposis coli down-regulated 1        | 5.63        |



| Probe set    | Accession No. | Symbol        | Gene Title                                      | Fold Change |
|--------------|---------------|---------------|-------------------------------------------------|-------------|
| 1417278_a_at | NM_001163660  | Nkd1          | naked cuticle 1 homolog (Drosophila)            | 5.61        |
| 1424638_at   | NM_001111099  | Cdkn1a        | cyclin-dependent kinase inhibitor 1A (P21)      | 5.55        |
| 1435162_at   | NM_008926     | Prkg2         | protein kinase, cGMP-dependent, type II         | 5.53        |
| 1416468_at   | NM_013467     | Aldh1a1       | aldehyde dehydrogenase family 1, subfamily A1   | 5.48        |
| 1433600_at   | NM_007417     | Adra2a        | adrenergic receptor, alpha 2a                   | 5.46        |
| 1436111_at   | NM_001164437  | Tmem212       | transmembrane protein 212                       | 5.36        |
| 1425357_a_at | NM_011824     | Grem1         | gremlin 1                                       | 5.21        |
| 1419465_at   | NM_028186     | Nkd2          | naked cuticle 2 homolog (Drosophila)            | 5.21        |
| 1435679_at   | NM_181848     | Optn          | optineurin                                      | 5.15        |
| 1447356_at   | NM_001002900  | AB099516 ///  | cDNA sequence AB099516 /// HIG1 domain          | 5.12        |
| 1454734_at   | NM_010703     | Lef1          | lymphoid enhancer binding factor 1              | 5.11        |
| 1419466_at   | NM_028186     | Nkd2          | naked cuticle 2 homolog (Drosophila)            | 5.09        |
| 1456335_at   | NM_001033288  | Gm106         | predicted gene 106                              | 5.08        |
| 1438399_at   | NM_001163516  | Pex5l         | peroxisomal biogenesis factor 5-like            | 5.02        |
| 1448083_at   | NM_177393     | Nalcn         | sodium leak channel, non-selective              | 5.00        |
| 1449478_at   | NM_010810     | Mmp7          | matrix metalloproteinase 7                      | 4.96        |
| 1449070_x_at | NM_133237     | Apcdd1        | adenomatosis polyposis coli down-regulated 1    | 4.95        |
| 1416053_at   | NM_008516     | Lrrn1         | leucine rich repeat protein 1, neuronal         | 4.92        |
| 1451054_at   | NM_008768     | Orm1          | orosomuroid 1                                   | 4.87        |
| 1438697_at   | NM_175432     | Tmem132c      | transmembrane protein 132C                      | 4.86        |
| 1434275_at   | NM_028186     | Nkd2          | naked cuticle 2 homolog (Drosophila)            | 4.80        |
| 1457429_s_at | NM_001033288  | Gm106         | predicted gene 106                              | 4.77        |
| 1433707_at   | NM_010251     | Gabra4        | gamma-aminobutyric acid (GABA) A receptor,      | 4.75        |
| 1423854_a_at | NM_026878     | Rasl11b       | RAS-like, family 11, member B                   | 4.74        |
| 1434172_at   | NM_007726     | Cnr1          | cannabinoid receptor 1 (brain)                  | 4.68        |
| 1417867_at   | NM_013459     | Cfd           | complement factor D (adipsin)                   | 4.62        |
| 1418601_at   | NM_011921     | Aldh1a7       | aldehyde dehydrogenase family 1, subfamily A7   | 4.62        |
| 1418456_a_at | NM_019568     | Cxcl14        | chemokine (C-X-C motif) ligand 14               | 4.60        |
| 1429896_at   | BE135996      | 5830408B19Rik | RIKEN cDNA 5830408B19 gene                      | 4.57        |
| 1421471_at   | NM_010934     | Npy1r         | neuropeptide Y receptor Y1                      | 4.56        |
| 1449133_at   | NM_009264     | Sprr1a        | small proline-rich protein 1A                   | 4.54        |
| 1437528_x_at | NM_001167925  | A730017C20Rik | RIKEN cDNA A730017C20 gene                      | 4.48        |
| 1447669_s_at | NM_010317     | Gng4          | guanine nucleotide binding protein (G protein), | 4.43        |
| 1454604_s_at | NM_173007     | Tspan12       | tetraspanin 12                                  | 4.42        |
| 1449182_at   | NM_022984     | Retn          | resistin                                        | 4.39        |
| 1432156_a_at | NM_021470     | Rnf32         | ring finger protein 32                          | 4.38        |
| 1438452_at   | NM_028757     | Nebi          | nebulin                                         | 4.33        |
| 1417021_a_at | NM_001083959  | Spo11         | sporulation protein, meiosis-specific, SPO11    | 4.33        |
| 1460256_at   | NM_007606     | Car3          | carbonic anhydrase 3                            | 4.32        |
| 1423183_at   | NM_020278     | Lgi1          | leucine-rich repeat LGI family, member 1        | 4.23        |
| 1435026_at   | NM_052994     | Spock2        | sparc/osteonectin, cwcv and kazal-like domains  | 4.22        |
| 1419148_at   | NM_009635     | Avil          | advillin                                        | 4.16        |
| 1422723_at   | NM_001162475  | Stra6         | stimulated by retinoic acid gene 6              | 4.16        |
| 1423912_at   | NM_001164224  | Aspscr1       | alveolar soft part sarcoma chromosome region,   | 4.07        |
| 1437403_at   | NM_177271     | Samd5         | sterile alpha motif domain containing 5         | 4.05        |

| Probe set    | Accession No. | Symbol        | Gene Title                                                        | Fold Change |
|--------------|---------------|---------------|-------------------------------------------------------------------|-------------|
| 1435460_at   | NM_008926     | Prkg2         | protein kinase, cGMP-dependent, type II                           | 4.02        |
| 1430307_a_at | NM_008615     | Me1           | malic enzyme 1, NADP(+)-dependent, cytosolic                      | 4.01        |
| 1455277_at   | NM_020259     | Hhip          | Hedgehog-interacting protein                                      | 3.98        |
| 1415977_at   | NM_023627     | Isyna1        | myo-inositol 1-phosphate synthase A1                              | 3.96        |
| 1454822_x_at | NM_133237     | Apcdd1        | adenomatosis polyposis coli down-regulated 1                      | 3.95        |
| 1449394_at   | NM_020495     | Slco1b2       | solute carrier organic anion transporter family,                  | 3.90        |
| 1422596_at   | NM_001141933  | Nkain4        | Na <sup>+</sup> /K <sup>+</sup> transporting ATPase interacting 4 | 3.89        |
| 1425039_at   | NM_145467     | Itgbl1        | integrin, beta-like 1                                             | 3.85        |
| 1422758_at   | NM_018763     | Chst2         | carbohydrate sulfotransferase 2                                   | 3.85        |
| 1422604_at   | NM_009474     | Uox           | urate oxidase                                                     | 3.84        |
| 1447272_s_at | NM_009728     | Atp10a        | ATPase, class V, type 10A                                         | 3.77        |
| 1434456_at   | NM_198620     | Rundc3b       | RUN domain containing 3B                                          | 3.77        |
| 1421811_at   | NM_011580     | Thbs1         | thrombospondin 1                                                  | 3.75        |
| 1436853_a_at | NM_001042451  | Snca          | synuclein, alpha                                                  | 3.74        |
| 1436450_at   | NM_001024931  | D11Bwg0517e   | DNA segment, Chr 11, Brigham & Women's                            | 3.74        |
| 1441936_x_at | BB310408      | ---           |                                                                   | 3.74        |
| 1421671_at   | NM_008291     | Hsd17b3       | hydroxysteroid (17-beta) dehydrogenase 3                          | 3.69        |
| 1421404_at   | NM_011339     | Cxcl15        | chemokine (C-X-C motif) ligand 15                                 | 3.69        |
| 1449382_at   | NM_133661     | Slc6a12       | solute carrier family 6 (neurotransmitter                         | 3.68        |
| 1416776_at   | NM_016669     | Crym          | crystallin, mu                                                    | 3.68        |
| 1417828_at   | NM_001109045  | Aqp8          | aquaporin 8                                                       | 3.66        |
| 1418057_at   | NM_001145886  | Tiam1         | T-cell lymphoma invasion and metastasis 1                         | 3.66        |
| 1417160_s_at | NM_007969     | Expi          | extracellular proteinase inhibitor                                | 3.64        |
| 1419225_at   | NM_009785     | Cacna2d3      | calcium channel, voltage-dependent, alpha2/delta                  | 3.61        |
| 1439109_at   | NM_201362     | Ccdc68        | coiled-coil domain containing 68                                  | 3.57        |
| 1424221_at   | NM_144796     | Susd4         | sushi domain containing 4                                         | 3.51        |
| 1428781_at   | NM_001166173  | Dmkn          | dermokine                                                         | 3.51        |
| 1418158_at   | NM_001127259  | Trp63         | transformation related protein 63                                 | 3.50        |
| 1416967_at   | NM_011443     | Sox2          | SRY-box containing gene 2                                         | 3.49        |
| 1418599_at   | NM_007729     | Col11a1       | collagen, type XI, alpha 1                                        | 3.49        |
| 1433577_at   | NM_001167925  | A730017C20Rik | RIKEN cDNA A730017C20 gene                                        | 3.49        |
| 1433977_at   | NM_018805     | Hs3st3b1      | heparan sulfate (glucosamine) 3-O-                                | 3.48        |
| 1435851_at   | NM_020278     | Lqi1          | leucine-rich repeat LGI family, member 1                          | 3.47        |
| 1442769_at   | NM_175418     | Mybpc1        | myosin binding protein C, slow-type                               | 3.47        |
| 1438558_x_at | NM_008239     | Foxq1         | forkhead box Q1                                                   | 3.47        |
| 1451236_at   | NM_001164212  | Rerg          | RAS-like, estrogen-regulated, growth-inhibitor                    | 3.47        |
| 1447520_at   | NM_008489     | Lbp           | lipopolysaccharide binding protein                                | 3.45        |
| 1456487_at   | NM_009622     | Adcy1         | adenylate cyclase 1                                               | 3.45        |
| 1448147_at   | NM_001164155  | Tnfrsf19      | tumor necrosis factor receptor superfamily,                       | 3.45        |
| 1455645_at   | NM_175418     | Mybpc1        | myosin binding protein C, slow-type                               | 3.44        |
| 1429444_at   | NM_026864     | Rasl11a       | RAS-like, family 11, member A                                     | 3.44        |
| 1456428_at   | NM_011339     | Cxcl15        | chemokine (C-X-C motif) ligand 15                                 | 3.43        |
| 1437604_x_at | NM_133237     | Apcdd1        | adenomatosis polyposis coli down-regulated 1                      | 3.42        |
| 1439251_at   | NM_008325     | Idua          | Iduronidase, alpha-L-                                             | 3.41        |
| 1432556_a_at | NM_001162878  | Fam183b       | family with sequence similarity 183, member B                     | 3.41        |

| Probe set    | Accession No. | Symbol   | Gene Title                                     | Fold Change |
|--------------|---------------|----------|------------------------------------------------|-------------|
| 1442166_at   | NM_153166     | Cpne5    | copine V                                       | 3.40        |
| 1455301_at   | NM_001167860  | Wipf3    | WAS/WASL interacting protein family, member 3  | 3.37        |
| 1433601_at   | NM_007417     | Adra2a   | adrenergic receptor, alpha 2a                  | 3.37        |
| 1426640_s_at | NM_144551     | Trib2    | tribbles homolog 2 (Drosophila)                | 3.37        |
| 1426322_a_at | NM_028231     | Kcnmb2   | potassium large conductance calcium-activated  | 3.36        |
| 1452260_at   | NM_178373     | Cidec    | cell death-inducing DFFA-like effector c       | 3.35        |
| 1436251_at   | NM_001025568  | Pde1c    | phosphodiesterase 1C                           | 3.34        |
| 1451371_at   | NM_029844     | Mrap     | melanocortin 2 receptor accessory protein      | 3.33        |
| 1447851_x_at | NM_009728     | Atp10a   | ATPase, class V, type 10A                      | 3.32        |
| 1435209_at   | NM_001081184  | BC057079 | cDNA sequence BC057079                         | 3.32        |
| 1425212_a_at | NM_001164155  | Tnfrsf19 | tumor necrosis factor receptor superfamily,    | 3.30        |
| 1460230_at   | NM_001111015  | Syn2     | synapsin II                                    | 3.29        |
| 1439748_at   | NM_001136060  | Dpp6     | dipeptidylpeptidase 6                          | 3.29        |
| 1429778_at   | NM_181848     | Optn     | optineurin                                     | 3.26        |
| 1415936_at   | NM_013867     | Bcar3    | breast cancer anti-estrogen resistance 3       | 3.25        |
| 1424729_at   | NM_145635     | Adig     | adipogenin                                     | 3.24        |
| 1419613_at   | NM_007738     | Col7a1   | collagen, type VII, alpha 1                    | 3.24        |
| 1449581_at   | NM_080595     | Emid1    | EMI domain containing 1                        | 3.22        |
| 1435642_at   | NM_178774     | Prr18    | proline rich region 18                         | 3.21        |
| 1458104_a_at | NM_001081369  | Ccdc153  | coiled-coil domain containing 153              | 3.21        |
| 1416211_a_at | NM_008973     | Ptn      | pleiotrophin                                   | 3.21        |
| 1417230_at   | NM_001159965  | Ralgps2  | Ral GEF with PH domain and SH3 binding motif 2 | 3.20        |
| 1457273_at   | NM_011856     | Odz2     | odd Oz/ten-m homolog 2 (Drosophila)            | 3.19        |
| 1452016_at   | NM_009663     | Alox5ap  | arachidonate 5-lipoxygenase activating protein | 3.16        |
| 1439153_at   | NM_001170643  | Rnf144b  | ring finger protein 144B                       | 3.15        |
| 1433972_at   | NM_001081557  | Camta1   | calmodulin binding transcription activator 1   | 3.14        |
| 1456379_x_at | NM_152915     | Dner     | delta/notch-like EGF-related receptor          | 3.14        |
| 1424096_at   | NM_027011     | Krt5     | keratin 5                                      | 3.13        |
| 1429273_at   | NM_028472     | Bmper    | BMP-binding endothelial regulator              | 3.12        |
| 1423671_at   | NM_152915     | Dner     | delta/notch-like EGF-related receptor          | 3.11        |
| 1423166_at   | NM_001159555  | Cd36     | CD36 antigen                                   | 3.11        |
| 1433471_at   | NM_009331     | Tcf7     | transcription factor 7, T-cell specific        | 3.09        |
| 1438035_at   | NM_201361     | Fam82a1  | family with sequence similarity 82, member A1  | 3.08        |
| 1443264_at   | NM_013516     | Ms4a2    | membrane-spanning 4-domains, subfamily A,      | 3.06        |
| 1452353_at   | NM_001080707  | Gpr155   | G protein-coupled receptor 155                 | 3.06        |
| 1434089_at   | NM_001109975  | Synpo    | synaptopodin                                   | 3.04        |
| 1452309_at   | NM_026599     | Cgnl1    | cingulin-like 1                                | 3.04        |
| 1418191_at   | NM_011909     | Usp18    | ubiquitin specific peptidase 18                | 3.03        |
| 1448595_a_at | NM_009052     | Bex1     | brain expressed gene 1                         | 3.02        |
| 1422866_at   | NM_007731     | Col13a1  | collagen, type XIII, alpha 1                   | 3.01        |
| 1460248_at   | NM_018867     | Cpxm2    | carboxypeptidase X 2 (M14 family)              | 3.01        |
| 1455980_a_at | NM_001033331  | Gas2l3   | growth arrest-specific 2 like 3                | 3.00        |
| 1441165_s_at | NM_022319     | Clstn2   | calsyntenin 2                                  | 2.98        |
| 1455280_at   | NM_001198811  | Frem1    | Fras1 related extracellular matrix protein 1   | 2.96        |
| 1437244_at   | NM_001033331  | Gas2l3   | growth arrest-specific 2 like 3                | 2.95        |

| Probe set    | Accession No. | Symbol        | Gene Title                                      | Fold Change |
|--------------|---------------|---------------|-------------------------------------------------|-------------|
| 1453523_at   | NM_001099774  | Krtap17-1     | keratin associated protein 17-1                 | 2.95        |
| 1448249_at   | NM_010271     | Gpd1          | glycerol-3-phosphate dehydrogenase 1 (soluble)  | 2.95        |
| 1422833_at   | NM_010446     | Foxa2         | forkhead box A2                                 | 2.94        |
| 1420965_a_at | NM_007930     | Enc1          | ectodermal-neural cortex 1                      | 2.94        |
| 1435645_at   | NM_026178     | Mmd           | monocyte to macrophage differentiation-         | 2.94        |
| 1449279_at   | NM_030677     | Gpx2          | glutathione peroxidase 2                        | 2.93        |
| 1416022_at   | NM_010634     | Fabp5         | fatty acid binding protein 5, epidermal         | 2.93        |
| 1449048_s_at | NM_009003     | Rab4a         | RAB4A, member RAS oncogene family               | 2.93        |
| 1418213_at   | NM_033373     | Krt23         | keratin 23                                      | 2.93        |
| 1437311_at   | NM_175692     | Snhg11        | small nucleolar RNA host gene 11                | 2.92        |
| 1450061_at   | NM_007930     | Enc1          | ectodermal-neural cortex 1                      | 2.91        |
| 1438713_at   | NM_027760     | Rassf8        | Ras association (RalGDS/AF-6) domain family (N- | 2.91        |
| 1436988_at   | NM_001126490  | Ism1          | isthmin 1 homolog (zebrafish)                   | 2.91        |
| 1418326_at   | NM_011404     | Slc7a5        | solute carrier family 7 (cationic amino acid    | 2.91        |
| 1418341_at   | NM_009003     | Rab4a         | RAB4A, member RAS oncogene family               | 2.91        |
| 1417788_at   | NM_011430     | Sncg          | synuclein, gamma                                | 2.90        |
| 1439106_at   | NM_172867     | Zfp462        | zinc finger protein 462                         | 2.89        |
| 1448416_at   | NM_008597     | Mgp           | matrix Gla protein                              | 2.89        |
| 1455627_at   | NM_007739     | Col8a1        | collagen, type VIII, alpha 1                    | 2.89        |
| 1419748_at   | NM_011994     | Abcd2         | ATP-binding cassette, sub-family D (ALD),       | 2.89        |
| 1434703_at   | NM_018788     | Extl3         | exostoses (multiple)-like 3                     | 2.88        |
| 1422870_at   | NM_013553     | Hoxc4         | homeobox C4                                     | 2.88        |
| 1437967_at   | NM_001025576  | Ccdc141       | coiled-coil domain containing 141               | 2.88        |
| 1436329_at   | NM_018781     | Egr3          | early growth response 3                         | 2.88        |
| 1416523_at   | NM_011271     | Rnase1        | ribonuclease, RNase A family, 1 (pancreatic)    | 2.87        |
| 1420719_at   | NM_031374     | Tex15         | testis expressed gene 15                        | 2.87        |
| 1419195_at   | NM_001045554  | Wfdc15b       | WAP four-disulfide core domain 15B              | 2.87        |
| 1440510_at   | XR_105307     | C430002N11Rik | RIKEN cDNA C430002N11 gene                      | 2.86        |
| 1424542_at   | NM_011311     | S100a4        | S100 calcium binding protein A4                 | 2.86        |
| 1436041_at   | NM_010402     | Hand2         | heart and neural crest derivatives expressed    | 2.86        |
| 1424704_at   | NM_001145920  | Runx2         | runt related transcription factor 2             | 2.85        |
| 1419000_at   | NM_018867     | Cpxm2         | carboxypeptidase X 2 (M14 family)               | 2.85        |
| 1458947_at   | AV341977      | ---           |                                                 | 2.85        |
| 1422479_at   | NM_019811     | Acss2         | acyl-CoA synthetase short-chain family member 2 | 2.84        |
| 1416021_a_at | NM_010634     | Fabp5 ///     | fatty acid binding protein 5, epidermal ///     | 2.83        |
| 1435047_at   | NM_023852     | Rab3c         | RAB3C, member RAS oncogene family               | 2.83        |
| 1456789_at   | NM_172867     | Zfp462        | zinc finger protein 462                         | 2.83        |
| 1416658_at   | NM_011356     | Frzb          | frizzled-related protein                        | 2.82        |
| 1427963_s_at | NM_153133     | Rdh9          | retinol dehydrogenase 9                         | 2.82        |
| 1418744_s_at | NM_021344     | Tesc          | tescalcin                                       | 2.81        |
| 1441075_at   | NM_181547     | Nostrin       | nitric oxide synthase trafficker                | 2.81        |
| 1449154_at   | NM_007729     | Col11a1       | collagen, type XI, alpha 1                      | 2.81        |
| 1460061_at   | AV342748      | ---           |                                                 | 2.80        |
| 1455063_at   | NM_201361     | Fam82a1       | family with sequence similarity 82, member A1   | 2.80        |
| 1419254_at   | NM_008638     | Mthfd2        | methylenetetrahydrofolate dehydrogenase (NAD+   | 2.80        |

| Probe set    | Accession No. | Symbol        | Gene Title                                         | Fold Change |
|--------------|---------------|---------------|----------------------------------------------------|-------------|
| 1443205_at   | AU067727      | D5Buc30e      | DNA segment, Chr 5, Bucan 30 expressed             | 2.79        |
| 1416612_at   | NM_009994     | Cyp1b1        | cytochrome P450, family 1, subfamily b,            | 2.79        |
| 1453102_at   | NM_001172160  | Flrt3         | fibronectin leucine rich transmembrane protein 3   | 2.79        |
| 1425002_at   | NM_145373     | Sectm1a       | secreted and transmembrane 1A                      | 2.79        |
| 1449280_at   | NM_023612     | Esm1          | endothelial cell-specific molecule 1               | 2.78        |
| 1436203_a_at | BM730637      | 1110059G02Rik | RIKEN cDNA 1110059G02 gene                         | 2.78        |
| 1426318_at   | NM_173052     | Serp1nb       | serine (or cysteine) peptidase inhibitor, clade B, | 2.78        |
| 1438720_at   | NM_001162537  | 9330159F19Rik | RIKEN cDNA 9330159F19 gene                         | 2.77        |
| 1437308_s_at | NM_010169     | F2r           | coagulation factor II (thrombin) receptor          | 2.77        |
| 1428572_at   | NM_027395     | Basp1         | brain abundant, membrane attached signal           | 2.76        |
| 1417541_at   | NM_008234     | Hells         | helicase, lymphoid specific                        | 2.75        |
| 1452013_at   | NM_009728     | Atp10a        | ATPase, class V, type 10A                          | 2.75        |
| 1455845_at   | NM_177618     | Wscd1         | WSC domain containing 1                            | 2.74        |
| 1450643_s_at | NM_007981     | Acs1          | acyl-CoA synthetase long-chain family member 1     | 2.73        |
| 1428535_at   | NM_001081963  | 9430020K01Rik | RIKEN cDNA 9430020K01 gene                         | 2.72        |
| 1442012_at   | AV381755      | AU015791      | expressed sequence AU015791                        | 2.72        |
| 1450852_s_at | NM_010169     | F2r           | coagulation factor II (thrombin) receptor          | 2.72        |
| 1430964_at   | AK009622      | 2310034O05Rik | RIKEN cDNA 2310034O05 gene                         | 2.71        |
| 1434685_at   | NM_177664     | D3Bwg0562e    | DNA segment, Chr 3, Brigham & Women's              | 2.70        |
| 1447807_s_at | NM_181073     | Plekhh1       | pleckstrin homology domain containing, family H    | 2.69        |
| 1451912_a_at | NM_001164259  | Fgfr1         | fibroblast growth factor receptor-like 1           | 2.66        |
| 1453003_at   | NM_011436     | Sor1          | sortilin-related receptor, LDLR class A repeats-   | 2.64        |
| 1428789_at   | NM_001159965  | Ralgps2       | Ral GEF with PH domain and SH3 binding motif 2     | 2.63        |
| 1436398_at   | BB033554      | ---           |                                                    | 2.62        |
| 1418425_at   | NM_130458     | Sp7           | Sp7 transcription factor 7                         | 2.62        |
| 1425837_a_at | NM_009834     | Ccrn4l        | CCR4 carbon catabolite repression 4-like (S.       | 2.60        |
| 1422612_at   | NM_013820     | Hk2           | hexokinase 2                                       | 2.59        |
| 1420796_at   | NM_009644     | Ahrr          | aryl-hydrocarbon receptor repressor                | 2.59        |
| 1427510_at   | NM_010305     | Gnai1         | guanine nucleotide binding protein (G protein),    | 2.58        |
| 1417273_at   | NM_013743     | Pdk4          | pyruvate dehydrogenase kinase, isoenzyme 4         | 2.58        |
| 1417266_at   | NM_009139     | Ccl6          | chemokine (C-C motif) ligand 6                     | 2.58        |
| 1417429_at   | NM_010231     | Fmo1          | flavin containing monooxygenase 1                  | 2.57        |
| 1428460_at   | NM_001111015  | Syn2          | synapsin II                                        | 2.57        |
| 1429400_at   | NM_016691     | Clcn5         | chloride channel 5                                 | 2.57        |
| 1448881_at   | NM_017370     | Hp            | haptoglobin                                        | 2.57        |
| 1417419_at   | NM_007631     | Ccnd1         | cyclin D1                                          | 2.57        |
| 1416630_at   | NM_008321     | Id3           | inhibitor of DNA binding 3                         | 2.56        |
| 1430697_at   | NM_019496     | Ammecr1       | Alport syndrome, mental retardation, midface       | 2.55        |
| 1416111_at   | NM_009856     | Cd83          | CD83 antigen                                       | 2.55        |
| 1435917_at   | NM_026950     | Ociad2        | OClA domain containing 2                           | 2.54        |
| 1423571_at   | NM_007901     | S1pr1         | sphingosine-1-phosphate receptor 1                 | 2.54        |
| 1439492_at   | NM_175467     | Sptlc3        | serine palmitoyltransferase, long chain base       | 2.54        |
| 1453416_at   | NM_001033331  | Gas2l3        | growth arrest-specific 2 like 3                    | 2.53        |
| 1428223_at   | NM_029662     | Mfsd2a        | major facilitator superfamily domain containing    | 2.52        |
| 1450784_at   | NM_016678     | Reck          | reversion-inducing-cysteine-rich protein with      | 2.52        |

| Probe set    | Accession No. | Symbol           | Gene Title                                         | Fold Change |
|--------------|---------------|------------------|----------------------------------------------------|-------------|
| 1418493_a_at | NM_001042451  | Snca             | synuclein, alpha                                   | 2.50        |
| 1448710_at   | NM_009911     | Cxcr4            | chemokine (C-X-C motif) receptor 4                 | 2.49        |
| 1450468_at   | NM_010865     | Myoc             | myocilin                                           | 2.49        |
| 1426225_at   | NM_001159487  | Rbp4             | retinol binding protein 4, plasma                  | 2.49        |
| 1427542_at   | NM_175407     | Sobp             | sine oculis-binding protein homolog (Drosophila)   | 2.49        |
| 1452517_at   | NM_181073     | Plekhh1          | pleckstrin homology domain containing, family H    | 2.49        |
| 1449342_at   | NM_023587     | Ptplb            | protein tyrosine phosphatase-like (proline instead | 2.49        |
| 1434052_at   | NM_178906     | AI593442         | expressed sequence AI593442                        | 2.49        |
| 1430584_s_at | NM_007606     | Car3             | carbonic anhydrase 3                               | 2.48        |
| 1438036_x_at | NM_201361     | Fam82a1          | family with sequence similarity 82, member A1      | 2.48        |
| 1437329_at   | NM_023587     | Ptplb            | protein tyrosine phosphatase-like (proline instead | 2.47        |
| 1420425_at   | NM_007548     | Prdm1            | PR domain containing 1, with ZNF domain            | 2.46        |
| 1453125_at   | NM_009234     | Sox11            | SRY-box containing gene 11                         | 2.46        |
| 1435387_at   | NM_001033633  | Slc2a13          | solute carrier family 2 (facilitated glucose       | 2.46        |
| 1421841_at   | NM_001163215  | Fgfr3            | fibroblast growth factor receptor 3                | 2.46        |
| 1419288_at   | NM_023844     | Jam2             | junction adhesion molecule 2                       | 2.45        |
| 1448550_at   | NM_008489     | Lbp              | lipopolysaccharide binding protein                 | 2.45        |
| 1424433_at   | NM_029619     | Msrb2            | methionine sulfoxide reductase B2                  | 2.45        |
| 1420731_a_at | NM_007792     | Csrp2            | cysteine and glycine-rich protein 2                | 2.44        |
| 1444341_at   | NM_175418     | Mybpc1           | myosin binding protein C, slow-type                | 2.44        |
| 1417561_at   | NM_001110009  | Apoc1            | apolipoprotein C-I                                 | 2.44        |
| 1456084_x_at | NM_021355     | Fmod             | fibromodulin                                       | 2.44        |
| 1418908_at   | NM_013626     | Pam              | peptidylglycine alpha-amidating monooxygenase      | 2.44        |
| 1418206_at   | NM_022324     | Sdf2l1           | stromal cell-derived factor 2-like 1               | 2.43        |
| 1437992_x_at | NM_010288     | Gja1             | gap junction protein, alpha 1                      | 2.42        |
| 1452514_a_at | NM_001122733  | Kit              | kit oncogene                                       | 2.42        |
| 1449880_s_at | NM_001032298  | Bglap /// Bglap- | bone gamma carboxyglutamate protein /// bone       | 2.42        |
| 1438012_at   | NM_178726     | Ppm1l            | protein phosphatase 1 (formerly 2C)-like           | 2.41        |
| 1436204_at   | BM730637      | 1110059G02Rik    | RIKEN cDNA 1110059G02 gene                         | 2.41        |
| 1424266_s_at | NM_144930     | Ces1f            | carboxylesterase 1F                                | 2.41        |
| 1418165_at   | NM_010584     | Itln1            | intelectin 1 (galactofuranose binding)             | 2.41        |
| 1453022_at   | NM_026730     | Gpihbp1          | GPI-anchored HDL-binding protein 1                 | 2.40        |
| 1450884_at   | NM_001159555  | Cd36             | CD36 antigen                                       | 2.40        |
| 1457275_at   | NM_183312     | Synm             | synemin, intermediate filament protein             | 2.40        |
| 1446408_at   | NM_001122950  | Hoxa10           | Homeobox A10                                       | 2.40        |
| 1432517_a_at | NM_010924     | Nnmt             | nicotinamide N-methyltransferase                   | 2.40        |
| 1421375_a_at | NM_011313     | S100a6           | S100 calcium binding protein A6 (calcylin)         | 2.40        |
| 1417673_at   | NM_016719     | Grb14            | growth factor receptor bound protein 14            | 2.39        |
| 1423883_at   | NM_007981     | Acs1l            | acyl-CoA synthetase long-chain family member 1     | 2.39        |
| 1417697_at   | NM_009230     | Soat1            | sterol O-acyltransferase 1                         | 2.39        |
| 1426152_a_at | NM_013598     | Kitl             | kit ligand                                         | 2.39        |
| 1423258_at   | NM_021889     | Syt9             | synaptotagmin IX                                   | 2.39        |
| 1417936_at   | NM_011338     | Ccl9             | chemokine (C-C motif) ligand 9                     | 2.39        |
| 1421009_at   | NM_021384     | Rsad2            | radical S-adenosyl methionine domain containing    | 2.39        |
| 1440015_at   | BB528896      | ---              |                                                    | 2.39        |

| Probe set    | Accession No. | Symbol        | Gene Title                                             | Fold Change |
|--------------|---------------|---------------|--------------------------------------------------------|-------------|
| 1429861_at   | NM_001081377  | Pcdh9         | protocadherin 9                                        | 2.38        |
| 1460458_at   | NM_030209     | Crispld2      | cysteine-rich secretory protein LCCL domain            | 2.38        |
| 1423418_at   | NM_134469     | Fdps          | farnesyl diphosphate synthetase                        | 2.37        |
| 1429310_at   | NM_001172160  | Flrt3         | fibronectin leucine rich transmembrane protein 3       | 2.37        |
| 1450387_s_at | NM_001177602  | Ak4           | adenylate kinase 4                                     | 2.36        |
| 1436287_at   | XM_003084771  | Gm10664       | predicted gene 10664                                   | 2.36        |
| 1434719_at   | NM_175628     | A2m           | alpha-2-macroglobulin                                  | 2.36        |
| 1431422_a_at | NM_019819     | Dusp14        | dual specificity phosphatase 14                        | 2.35        |
| 1460593_at   | NM_144796     | Susd4         | sushi domain containing 4                              | 2.35        |
| 1418945_at   | NM_010809     | Mmp3          | matrix metalloproteinase 3                             | 2.35        |
| 1429051_s_at | NM_009234     | Sox11         | SRY-box containing gene 11                             | 2.35        |
| 1423371_at   | NM_025882     | Pole4         | polymerase (DNA-directed), epsilon 4 (p12              | 2.35        |
| 1438288_x_at | BB766817      | 1110059G02Rik | RIKEN cDNA 1110059G02 gene                             | 2.35        |
| 1415800_at   | NM_010288     | Gja1          | gap junction protein, alpha 1                          | 2.34        |
| 1439117_at   | NM_001040682  | Clmn          | calmin                                                 | 2.34        |
| 1430425_at   | NM_172800     | Sdk2          | sidekick homolog 2 (chicken)                           | 2.34        |
| 1429030_at   | NM_001135172  | C1qtnf7       | C1q and tumor necrosis factor related protein 7        | 2.33        |
| 1418743_a_at | NM_021344     | Tesc          | tescalcin                                              | 2.33        |
| 1452288_at   | NM_172742     | Mtmr10        | myotubularin related protein 10                        | 2.33        |
| 1425099_a_at | NM_007489     | Arntl         | aryl hydrocarbon receptor nuclear translocator-        | 2.32        |
| 1455610_at   | NM_183312     | Synm          | synemin, intermediate filament protein                 | 2.32        |
| 1457851_at   | BG066654      | ---           |                                                        | 2.32        |
| 1458379_at   | NM_001162537  | 9330159F19Rik | RIKEN cDNA 9330159F19 gene                             | 2.32        |
| 1452888_at   | NM_028637     | 1110034G24Rik | RIKEN cDNA 1110034G24 gene                             | 2.32        |
| 1455851_at   | NM_007555     | Bmp5          | bone morphogenetic protein 5                           | 2.32        |
| 1423311_s_at | NM_001164792  | Tpbp          | trophoblast glycoprotein                               | 2.32        |
| 1457038_at   | NM_172862     | Frem2         | Fras1 related extracellular matrix protein 2           | 2.31        |
| 1449186_at   | NM_026121     | Bag4          | BCL2-associated athanogene 4                           | 2.31        |
| 1420249_s_at | NM_009139     | Ccl6          | chemokine (C-C motif) ligand 6                         | 2.31        |
| 1424015_at   | NM_021494     | Dennd5a       | DENN/MADD domain containing 5A                         | 2.30        |
| 1417019_a_at | NM_001025779  | Cdc6          | cell division cycle 6 homolog ( <i>S. cerevisiae</i> ) | 2.30        |
| 1433939_at   | NM_010678     | Aff3          | AF4/FMR2 family, member 3                              | 2.30        |
| 1415864_at   | NM_007563     | Bpgm          | 2,3-bisphosphoglycerate mutase                         | 2.30        |
| 1437932_a_at | NM_016674     | Cldn1         | claudin 1                                              | 2.30        |
| 1424842_a_at | NM_029270     | Arhgap24      | Rho GTPase activating protein 24                       | 2.30        |
| 1428357_at   | NM_173744     | 2610019F03Rik | RIKEN cDNA 2610019F03 gene                             | 2.29        |
| 1437066_at   | NM_019778     | Zbtb20        | zinc finger and BTB domain containing 20               | 2.29        |
| 1420739_at   | NM_008779     | Cntn3         | contactin 3                                            | 2.29        |
| 1423285_at   | NM_001198835  | Coch          | coagulation factor C homolog ( <i>Limulus</i>          | 2.28        |
| 1457248_x_at | NM_010476     | Hsd17b7       | hydroxysteroid (17-beta) dehydrogenase 7               | 2.28        |
| 1453509_at   | NM_026671     | Lypd2         | Ly6/Plaur domain containing 2                          | 2.28        |
| 1436058_at   | NM_021384     | Rsad2         | radical S-adenosyl methionine domain containing        | 2.27        |
| 1453187_at   | NM_026950     | Ociad2        | OClA domain containing 2                               | 2.27        |
| 1433719_at   | NM_177909     | Slc9a9        | solute carrier family 9 (sodium/hydrogen               | 2.26        |
| 1452418_at   | BF719154      | 1200016E24Rik | RIKEN cDNA 1200016E24 gene                             | 2.26        |

| Probe set    | Accession No. | Symbol        | Gene Title                                      | Fold Change |
|--------------|---------------|---------------|-------------------------------------------------|-------------|
| 1423372_at   | NM_025882     | Pole4         | polymerase (DNA-directed), epsilon 4 (p12       | 2.26        |
| 1453622_s_at | NM_027326     | Mllt3         | myeloid/lymphoid or mixed-lineage leukemia      | 2.25        |
| 1451458_at   | NM_001033759  | Tmem2         | transmembrane protein 2                         | 2.25        |
| 1453317_a_at | NM_010158     | Khdrbs3       | KH domain containing, RNA binding, signal       | 2.25        |
| 1441687_at   | NM_009523     | LOC100503611  | hypothetical protein LOC100503611 /// wingless- | 2.25        |
| 1417389_at   | NM_016696     | Gpc1          | glypican 1                                      | 2.24        |
| 1438650_x_at | NM_010288     | Gja1          | gap junction protein, alpha 1                   | 2.24        |
| 1423022_at   | NM_007417     | Adra2a        | adrenergic receptor, alpha 2a                   | 2.24        |
| 1434777_at   | NM_008506     | Mycl1         | v-myc myelocytomatosis viral oncogene homolog   | 2.24        |
| 1444905_at   | BG069198      | D1ErtD705e    | DNA segment, Chr 1, ERATO Doi 705, expressed    | 2.23        |
| 1430923_at   | AK011946      | 2610300M13Rik | RIKEN cDNA 2610300M13 gene                      | 2.22        |
| 1434758_at   | NM_030209     | Crispld2      | cysteine-rich secretory protein LCCL domain     | 2.22        |
| 1460163_at   | NM_001135172  | C1qtnf7       | C1q and tumor necrosis factor related protein 7 | 2.22        |
| 1422072_a_at | NM_008184     | Gstm6         | glutathione S-transferase, mu 6                 | 2.22        |
| 1429660_s_at | NM_008017     | Smc2          | structural maintenance of chromosomes 2         | 2.22        |
| 1448021_at   | NM_001142952  | Fam46c        | family with sequence similarity 46, member C    | 2.21        |
| 1437347_at   | NM_001136061  | Ednrb         | endothelin receptor type B                      | 2.21        |
| 1420385_at   | NM_008137     | Gna14         | guanine nucleotide binding protein, alpha 14    | 2.20        |
| 1437056_x_at | NM_030209     | Crispld2      | cysteine-rich secretory protein LCCL domain     | 2.20        |
| 1452257_at   | NM_001122683  | Bdh1          | 3-hydroxybutyrate dehydrogenase, type 1         | 2.19        |
| 1424338_at   | NM_144512     | Slc6a13       | solute carrier family 6 (neurotransmitter       | 2.19        |
| 1418440_at   | NM_007739     | Col8a1        | collagen, type VIII, alpha 1                    | 2.19        |
| 1431890_a_at | NM_027326     | Mllt3         | myeloid/lymphoid or mixed-lineage leukemia      | 2.19        |
| 1448700_at   | NM_008059     | G0s2          | G0/G1 switch gene 2                             | 2.19        |
| 1420342_at   | XM_895068     | Gdap10        | ganglioside-induced differentiation-associated- | 2.19        |
| 1438603_x_at | NM_008555     | Masp1         | mannan-binding lectin serine peptidase 1        | 2.19        |
| 1452283_at   | NM_027760     | Rassf8        | Ras association (RalGDS/AF-6) domain family (N- | 2.18        |
| 1425863_a_at | NM_001164401  | Ptpro         | protein tyrosine phosphatase, receptor type, O  | 2.18        |
| 1429471_at   | NM_001048005  | 1110017D15Rik | RIKEN cDNA 1110017D15 gene                      | 2.18        |
| 1436790_a_at | NM_009234     | Sox11         | SRY-box containing gene 11                      | 2.18        |
| 1447791_s_at | NM_008137     | Gna14         | guanine nucleotide binding protein, alpha 14    | 2.17        |
| 1426283_at   | NM_172290     | Ntm           | neurotrimin                                     | 2.17        |
| 1419251_at   | NM_001159964  | Eps15         | epidermal growth factor receptor pathway        | 2.16        |
| 1422324_a_at | NM_008970     | Pthlh         | parathyroid hormone-like peptide                | 2.16        |
| 1435551_at   | NM_175276     | Fhod3         | formin homology 2 domain containing 3           | 2.16        |
| 1448789_at   | NM_053080     | Aldh1a3       | aldehyde dehydrogenase family 1, subfamily A3   | 2.15        |
| 1417803_at   | NM_001164210  | 1110032A04Rik | RIKEN cDNA 1110032A04 gene                      | 2.15        |
| 1422727_at   | NM_080637     | Nme5          | non-metastatic cells 5, protein expressed in    | 2.15        |
| 1417801_a_at | NM_001163557  | Ppfibp2       | PTPRF interacting protein, binding protein 2    | 2.15        |
| 1457686_at   | NM_001081956  | Akap17b       | A kinase (PRKA) anchor protein 17B              | 2.15        |
| 1450863_a_at | NM_001111051  | Dclk1         | doublecortin-like kinase 1                      | 2.15        |
| 1437439_at   | NM_001162906  | 2410089E03Rik | RIKEN cDNA 2410089E03 gene                      | 2.15        |
| 1423310_at   | NM_001164792  | Tpbp          | trophoblast glycoprotein                        | 2.15        |
| 1455717_s_at | NM_001008231  | Daam2         | dishevelled associated activator of             | 2.15        |
| 1447878_s_at | NM_001164259  | Fgfr1         | fibroblast growth factor receptor-like 1        | 2.15        |



| Probe set    | Accession No. | Symbol        | Gene Title                                         | Fold Change |
|--------------|---------------|---------------|----------------------------------------------------|-------------|
| 1448201_at   | NM_009144     | Sfrp2         | secreted frizzled-related protein 2                | 2.14        |
| 1448613_at   | NM_007899     | Ecm1          | extracellular matrix protein 1                     | 2.14        |
| 1429209_at   | NM_153393     | Col23a1       | collagen, type XXIII, alpha 1                      | 2.14        |
| 1450451_at   | NM_052994     | Spock2        | sparc/osteonectin, cwcv and kazal-like domains     | 2.14        |
| 1425526_a_at | NM_001025570  | Prrx1         | paired related homeobox 1                          | 2.14        |
| 1453320_at   | NM_029604     | 1700027A23Rik | RIKEN cDNA 1700027A23 gene                         | 2.14        |
| 1453238_s_at | NR_002860     | 3930401B19Rik | RIKEN cDNA 3930401B19 gene /// RIKEN cDNA          | 2.14        |
| 1416490_at   | NM_025458     | Tmed6         | transmembrane emp24 protein transport domain       | 2.13        |
| 1433716_x_at | NM_008115     | Gfra2         | glial cell line derived neurotrophic factor family | 2.13        |
| 1428909_at   | NR_002860     | A130040M12Rik | RIKEN cDNA A130040M12 gene                         | 2.13        |
| 1415939_at   | NM_021355     | Fmod          | fibromodulin                                       | 2.13        |
| 1426981_at   | NM_011048     | Pcsk6         | proprotein convertase subtilisin/kexin type 6      | 2.13        |
| 1428705_at   | NM_027040     | 1700007K13Rik | RIKEN cDNA 1700007K13 gene                         | 2.13        |
| 1427231_at   | NM_019413     | Robo1         | roundabout homolog 1 (Drosophila)                  | 2.13        |
| 1434129_s_at | NM_172589     | Lhfp12        | lipoma HMGIC fusion partner-like 2                 | 2.12        |
| 1416939_at   | NM_026438     | Ppa1          | pyrophosphatase (inorganic) 1                      | 2.12        |
| 1438945_x_at | NM_010288     | Gja1          | gap junction protein, alpha 1                      | 2.12        |
| 1421341_at   | NM_015732     | Axin2         | axin2                                              | 2.11        |
| 1437065_at   | NM_019778     | Zbtb20        | zinc finger and BTB domain containing 20           | 2.11        |
| 1438672_at   | NM_133167     | Parvb         | parvin, beta                                       | 2.10        |
| 1438789_s_at | NM_001136086  | Dpysl3        | dihydropyrimidinase-like 3                         | 2.10        |
| 1451064_a_at | NM_177420     | Psat1         | phosphoserine aminotransferase 1                   | 2.10        |
| 1417355_at   | NM_008817     | Peg3          | paternally expressed 3                             | 2.09        |
| 1449166_at   | NM_001163525  | S100a14       | S100 calcium binding protein A14                   | 2.09        |
| 1435061_at   | NM_001031664  | Nudt10        | nudix (nucleoside diphosphate linked moiety X)-    | 2.09        |
| 1439015_at   | NM_010279     | Gfra1         | glial cell line derived neurotrophic factor family | 2.09        |
| 1417529_at   | NM_011228     | Rab33a        | RAB33A, member of RAS oncogene family              | 2.09        |
| 1430139_at   | NM_008234     | Hells         | helicase, lymphoid specific                        | 2.09        |
| 1422735_at   | NM_008239     | Foxq1         | forkhead box Q1                                    | 2.08        |
| 1430435_at   | NM_010678     | Aff3          | AF4/FMR2 family, member 3                          | 2.08        |
| 1425518_at   | NM_019688     | Rapgef4       | Rap guanine nucleotide exchange factor (GEF) 4     | 2.08        |
| 1453225_at   | NM_172399     | A930038C07Rik | RIKEN cDNA A930038C07 gene                         | 2.07        |
| 1448898_at   | NM_011338     | Ccl9          | chemokine (C-C motif) ligand 9                     | 2.07        |
| 1428731_at   | NM_030180     | Usp54         | ubiquitin specific peptidase 54                    | 2.07        |
| 1429205_at   | NM_027326     | Mllt3         | myeloid/lymphoid or mixed-lineage leukemia         | 2.07        |
| 1452837_at   | NM_001164885  | Lpin2         | lipin 2                                            | 2.06        |
| 1451577_at   | NM_019778     | Zbtb20        | zinc finger and BTB domain containing 20           | 2.06        |
| 1435653_at   | NM_018811     | Abhd2         | abhydrolase domain containing 2                    | 2.06        |
| 1435511_at   | NM_001111015  | Syn2          | synapsin II                                        | 2.06        |
| 1455392_at   | NM_178774     | Prr18         | proline rich region 18                             | 2.06        |
| 1449408_at   | NM_023844     | Jam2          | junction adhesion molecule 2                       | 2.06        |
| 1449110_at   | NM_007483     | Rhob          | ras homolog gene family, member B                  | 2.06        |
| 1439543_at   | XM_622231     | 1110064A23Rik | RIKEN cDNA 1110064A23 gene                         | 2.05        |
| 1440446_at   | NM_001163660  | Nkd1          | naked cuticle 1 homolog (Drosophila)               | 2.05        |
| 1452661_at   | NM_011638     | Tfrc          | transferrin receptor                               | 2.05        |

| Probe set    | Accession No. | Symbol        | Gene Title                                       | Fold Change |
|--------------|---------------|---------------|--------------------------------------------------|-------------|
| 1435699_at   | NM_178726     | Ppm1l         | protein phosphatase 1 (formerly 2C)-like         | 2.05        |
| 1441316_at   | NM_011720     | Wnt8b         | wingless related MMTV integration site 8b        | 2.05        |
| 1435089_at   | NM_028079     | 201011101Rik  | RIKEN cDNA 201011101 gene                        | 2.04        |
| 1455055_at   | NM_001164620  | Ccdc157       | coiled-coil domain containing 157                | 2.04        |
| 1425546_a_at | NM_133977     | Trf           | transferrin                                      | 2.04        |
| 1429166_s_at | NM_001040682  | Clmn          | calmin                                           | 2.04        |
| 1434440_at   | NM_010305     | Gnai1         | guanine nucleotide binding protein (G protein),  | 2.04        |
| 1445949_at   | BG069486      | ---           |                                                  | 2.04        |
| 1423312_at   | NM_001164792  | Tpbpg         | trophoblast glycoprotein                         | 2.04        |
| 1455466_at   | NM_001081342  | Gpr133        | G protein-coupled receptor 133                   | 2.03        |
| 1450782_at   | NM_009523     | Wnt4          | wingless-related MMTV integration site 4         | 2.03        |
| 1419147_at   | NM_020002     | Rec8          | REC8 homolog (yeast)                             | 2.02        |
| 1435787_at   | NM_178726     | Ppm1l         | protein phosphatase 1 (formerly 2C)-like         | 2.02        |
| 1427932_s_at | NR_002860     | 1200003110Rik | RIKEN cDNA 1200003110 gene /// RIKEN cDNA        | 2.02        |
| 1424400_a_at | NM_027406     | Aldh1l1 ///   | aldehyde dehydrogenase 1 family, member L1 ///   | 2.02        |
| 1448961_at   | NM_001195084  | Plscr2        | phospholipid scramblase 2                        | 2.02        |
| 1417937_at   | NM_001190466  | Dact1         | dapper homolog 1, antagonist of beta-catenin     | 2.02        |
| 1435123_at   | NM_001082483  | Efr3b         | EFR3 homolog B (S. cerevisiae)                   | 2.02        |
| 1420941_at   | NM_009063     | Rgs5          | regulator of G-protein signaling 5               | 2.01        |
| 1430700_a_at | NM_013737     | Pla2g7        | phospholipase A2, group VII (platelet-activating | 2.01        |
| 1455320_at   | NM_021524     | Nampt         | nicotinamide phosphoribosyltransferase           | 2.01        |
| 1448029_at   | NM_011535     | Tbx3          | T-box 3                                          | 2.01        |
| 1435137_s_at | NR_002860     | 1200015M12Rik | RIKEN cDNA 1200015M12 gene /// RIKEN cDNA        | 2.01        |
| 1452836_at   | NM_001164885  | Lpin2         | lipin 2                                          | 2.01        |
| 1421641_at   | NM_009209     | Slc6a2        | solute carrier family 6 (neurotransmitter        | 2.01        |
| 1423078_a_at | NM_025436     | Sc4mol        | sterol-C4-methyl oxidase-like                    | 2.01        |
| 1451991_at   | NM_001122889  | Epha7         | Eph receptor A7                                  | 2.01        |
| 1431429_a_at | NM_001039515  | Arl4a         | ADP-ribosylation factor-like 4A                  | 2.00        |
| 1421908_a_at | NM_011544     | Tcf12         | transcription factor 12                          | 2.00        |
| 1451062_a_at | NM_001163516  | Pex5l         | peroxisomal biogenesis factor 5-like             | 2.00        |
| 1418203_at   | NM_021451     | Pmaip1        | phorbol-12-myristate-13-acetate-induced protein  | 2.00        |
| 1449848_at   | NM_008137     | Gna14         | guanine nucleotide binding protein, alpha 14     | 2.00        |
| 1426575_at   | NM_001168525  | Sgms1         | sphingomyelin synthase 1                         | 1.99        |
| 1435479_at   | NM_007557     | Bmp7          | bone morphogenetic protein 7                     | 1.99        |
| 1423804_a_at | NM_145360     | Idi1          | isopentenyl-diphosphate delta isomerase          | 1.99        |
| 1434820_s_at | NM_001039390  | Pkig          | protein kinase inhibitor, gamma                  | 1.99        |
| 1422598_at   | NM_009813     | Casq1         | calsequestrin 1                                  | 1.99        |
| 1420377_at   | NM_009181     | St8sia2       | ST8 alpha-N-acetyl-neuraminide alpha-2,8-        | 1.99        |
| 1435110_at   | NM_029770     | Unc5b         | unc-5 homolog B (C. elegans)                     | 1.99        |
| 1435053_s_at | NM_181073     | Plekhh1       | pleckstrin homology domain containing, family H  | 1.98        |
| 1448254_at   | NM_008973     | Ptn           | pleiotrophin                                     | 1.98        |
| 1435092_at   | NM_001039515  | Arl4a         | ADP-ribosylation factor-like 4A                  | 1.98        |
| 1434362_at   | BM249454      | ---           |                                                  | 1.98        |
| 1423945_a_at | NM_001039390  | Pkig          | protein kinase inhibitor, gamma                  | 1.98        |
| 1416411_at   | NM_008183     | Gstm2         | glutathione S-transferase, mu 2                  | 1.98        |

| Probe set    | Accession No. | Symbol        | Gene Title                                       | Fold Change |
|--------------|---------------|---------------|--------------------------------------------------|-------------|
| 1438329_at   | NM_205823     | Tlr12         | toll-like receptor 12                            | 1.98        |
| 1438855_x_at | NM_009396     | Tnfaip2       | tumor necrosis factor, alpha-induced protein 2   | 1.98        |
| 1460129_at   | NM_009209     | Slc6a2        | solute carrier family 6 (neurotransmitter        | 1.97        |
| 1428136_at   | NM_013834     | Sfrp1         | secreted frizzled-related protein 1              | 1.97        |
| 1438443_at   | NM_019778     | Zbtb20        | zinc finger and BTB domain containing 20         | 1.97        |
| 1437617_x_at | NM_028637     | 1110034G24Rik | RIKEN cDNA 1110034G24 gene                       | 1.97        |
| 1436050_x_at | NM_019479     | Hes6          | hairy and enhancer of split 6 (Drosophila)       | 1.96        |
| 1418957_at   | NM_016853     | Stac          | src homology three (SH3) and cysteine rich       | 1.96        |
| 1431777_a_at | NM_026122     | Hmgn3         | high mobility group nucleosomal binding domain   | 1.96        |
| 1434130_at   | NM_172589     | Lhfp12        | lipoma HMGIC fusion partner-like 2               | 1.96        |
| 1433924_at   | NM_008817     | Peg3          | paternally expressed 3                           | 1.96        |
| 1448507_at   | NM_028889     | Efhd1         | EF hand domain containing 1                      | 1.96        |
| 1455304_at   | NM_001081153  | Unc13c        | unc-13 homolog C (C. elegans)                    | 1.96        |
| 1456545_at   | NM_010553     | Il18rap       | interleukin 18 receptor accessory protein        | 1.96        |
| 1452977_at   | NM_177263     | Zhx3          | zinc fingers and homeoboxes 3                    | 1.96        |
| 1453677_a_at | NM_024440     | Der13         | Der1-like domain family, member 3                | 1.95        |
| 1424790_at   | NM_001007570  | Slc25a42      | solute carrier family 25, member 42              | 1.95        |
| 1457105_at   | NM_181422     | Pkd2l1        | polycystic kidney disease 2-like 1               | 1.95        |
| 1457265_at   | NM_001081956  | Akap17b       | A kinase (PRKA) anchor protein 17B               | 1.95        |
| 1457279_at   | XR_106390     | LOC100504040  | hypothetical LOC100504040                        | 1.94        |
| 1444089_at   | NM_009260     | Spnb2         | spectrin beta 2                                  | 1.94        |
| 1449452_a_at | NM_025989     | Gp2           | glycoprotein 2 (zymogen granule membrane)        | 1.94        |
| 1426607_at   | NM_001039244  | Gm7120        | predicted gene 7120                              | 1.94        |
| 1426258_at   | NM_011436     | Sorl1         | sortilin-related receptor, LDLR class A repeats- | 1.94        |
| 1420707_a_at | NM_011634     | Traip         | TRAF-interacting protein                         | 1.94        |
| 1434621_at   | NM_001001183  | Tmem204       | transmembrane protein 204                        | 1.93        |
| 1415945_at   | NM_008566     | Mcm5          | minichromosome maintenance deficient 5, cell     | 1.93        |
| 1423860_at   | NM_008963     | Ptgds         | prostaglandin D2 synthase (brain)                | 1.93        |
| 1449846_at   | NM_007895     | Ear2          | eosinophil-associated, ribonuclease A family,    | 1.93        |
| 1435987_x_at | BM570681      | 1110059G02Rik | RIKEN cDNA 1110059G02 gene                       | 1.93        |
| 1451899_a_at | NM_001081462  | Gtf2ird1      | general transcription factor II I repeat domain- | 1.93        |
| 1422526_at   | NM_007981     | Acsl1         | acyl-CoA synthetase long-chain family member 1   | 1.93        |
| 1450607_s_at | NM_145077     | Ucn2          | urocortin 2                                      | 1.93        |
| 1426530_a_at | NM_175174     | Klhl5         | kelch-like 5 (Drosophila)                        | 1.93        |
| 1423488_at   | NM_026178     | Mmd           | monocyte to macrophage differentiation-          | 1.93        |
| 1439128_at   | NM_019778     | Zbtb20        | zinc finger and BTB domain containing 20         | 1.93        |
| 1424089_a_at | NM_001083967  | Tcf4          | transcription factor 4                           | 1.92        |
| 1450650_at   | NM_019472     | Myo10         | myosin X                                         | 1.92        |
| 1454086_a_at | NM_001142335  | Lmo2          | LIM domain only 2                                | 1.92        |
| 1446812_at   | XM_001474844  | Gm2818        | Predicted gene 2818                              | 1.92        |
| 1448606_at   | NM_010336     | Lpar1         | lysophosphatidic acid receptor 1                 | 1.92        |
| 1454959_s_at | NM_010305     | Gnai1         | guanine nucleotide binding protein (G protein),  | 1.92        |
| 1424767_at   | NM_174988     | Cdh22         | cadherin 22                                      | 1.92        |
| 1439019_at   | NM_175473     | Fras1         | Fraser syndrome 1 homolog (human)                | 1.91        |
| 1421008_at   | NM_021384     | Rsad2         | radical S-adenosyl methionine domain containing  | 1.91        |

| Probe set    | Accession No. | Symbol        | Gene Title                                        | Fold Change |
|--------------|---------------|---------------|---------------------------------------------------|-------------|
| 1448117_at   | NM_013598     | Kitl          | kit ligand                                        | 1.91        |
| 1430143_at   | AK015205      | 4930426D05Rik | RIKEN cDNA 4930426D05 gene                        | 1.91        |
| 1417426_at   | NM_011157     | Srgn          | serglycin                                         | 1.91        |
| 1437393_at   | NM_011101     | Prkca         | protein kinase C, alpha                           | 1.91        |
| 1456752_at   | XR_104769     | LOC100503083  | hypothetical LOC100503083                         | 1.91        |
| 1450276_a_at | NM_001146196  | Scin          | scinderin                                         | 1.91        |
| 1454607_s_at | NM_177420     | Psat1         | phosphoserine aminotransferase 1                  | 1.91        |
| 1434875_a_at | NM_026122     | Hmgn3         | high mobility group nucleosomal binding domain    | 1.90        |
| 1418707_at   | NM_026121     | Bag4          | BCL2-associated athanogene 4                      | 1.90        |
| 1425310_a_at | NM_024474     | Emid2         | EMI domain containing 2                           | 1.90        |
| 1418540_a_at | NM_011212     | Ptpre         | protein tyrosine phosphatase, receptor type, E    | 1.90        |
| 1448119_at   | NM_007563     | Bpgm          | 2,3-bisphosphoglycerate mutase                    | 1.89        |
| 1416183_a_at | NM_008492     | Ldhb          | lactate dehydrogenase B                           | 1.89        |
| 1429549_at   | NM_025685     | Col27a1       | collagen, type XXVII, alpha 1                     | 1.89        |
| 1424659_at   | NM_178804     | Slit2         | slit homolog 2 (Drosophila)                       | 1.89        |
| 1424663_at   | NM_145430     | BC017647      | cDNA sequence BC017647                            | 1.89        |
| 1425270_at   | NM_008441     | Kif1b         | kinesin family member 1B                          | 1.89        |
| 1440911_at   | NM_153393     | Col23a1       | collagen, type XXIII, alpha 1                     | 1.89        |
| 1427600_at   | BC025871      | ---           |                                                   | 1.88        |
| 1427437_at   | BC019134      | ---           |                                                   | 1.88        |
| 1433971_at   | NM_001081557  | Camta1        | calmodulin binding transcription activator 1      | 1.88        |
| 1455609_at   | NM_007708     | Cit           | citron                                            | 1.88        |
| 1416724_x_at | NM_001083967  | Tcf4          | transcription factor 4                            | 1.88        |
| 1420028_s_at | NM_008563     | Mcm3          | minichromosome maintenance deficient 3 (S.        | 1.87        |
| 1449131_s_at | NM_007639     | Cd1d1         | CD1d1 antigen                                     | 1.87        |
| 1416343_a_at | NM_001017959  | Lamp2         | lysosomal-associated membrane protein 2           | 1.87        |
| 1448052_at   | NM_026599     | Cgn1          | cingulin-like 1                                   | 1.87        |
| 1419627_s_at | NM_001190320  | Clec4n        | C-type lectin domain family 4, member n           | 1.87        |
| 1415865_s_at | NM_007563     | Bpgm          | 2,3-bisphosphoglycerate mutase                    | 1.87        |
| 1435608_at   | NM_001080924  | Znrf3         | zinc and ring finger 3                            | 1.87        |
| 1419486_at   | NM_008592     | Foxc1         | forkhead box C1                                   | 1.87        |
| 1427912_at   | NM_173047     | Cbr3          | carbonyl reductase 3                              | 1.87        |
| 1418219_at   | NM_008357     | Il15          | interleukin 15                                    | 1.87        |
| 1431704_a_at | NM_001159965  | Ralgps2       | Ral GEF with PH domain and SH3 binding motif 2    | 1.86        |
| 1426955_at   | NM_001109991  | Col18a1       | collagen, type XVIII, alpha 1                     | 1.86        |
| 1454198_a_at | NM_025769     | Efcab1        | EF hand calcium binding domain 1                  | 1.86        |
| 1436539_at   | NM_001040682  | Clmn          | calmin                                            | 1.86        |
| 1417749_a_at | NM_001163574  | Tjp1          | tight junction protein 1                          | 1.86        |
| 1447819_x_at | NM_007739     | Col8a1        | collagen, type VIII, alpha 1                      | 1.86        |
| 1448136_at   | NM_001136077  | Enpp2         | ectonucleotide                                    | 1.85        |
| 1427008_at   | NM_172448     | Rnf43         | ring finger protein 43                            | 1.85        |
| 1460742_at   | NM_145939     | Alg3          | asparagine-linked glycosylation 3 homolog (yeast, | 1.85        |
| 1453269_at   | NM_029770     | Unc5b         | unc-5 homolog B (C. elegans)                      | 1.85        |
| 1449823_at   | NM_001142570  | Dach2         | dachshund 2 (Drosophila)                          | 1.85        |
| 1455663_at   | NM_172907     | Olfml1        | olfactomedin-like 1                               | 1.85        |

| Probe set    | Accession No. | Symbol        | Gene Title                                          | Fold Change |
|--------------|---------------|---------------|-----------------------------------------------------|-------------|
| 1419252_at   | NM_001159964  | Eps15         | epidermal growth factor receptor pathway            | 1.85        |
| 1434709_at   | NM_001146031  | Nrcam         | neuron-glia-CAM-related cell adhesion molecule      | 1.85        |
| 1422411_s_at | NM_001012766  | BC151093 ///  | cDNA sequence BC151093 ///<br>eosinophil-           | 1.85        |
| 1453009_at   | NM_027468     | Cpm           | carboxypeptidase M                                  | 1.84        |
| 1417190_at   | NM_021524     | Nampt         | nicotinamide phosphoribosyltransferase              | 1.84        |
| 1422064_a_at | NM_019778     | Zbtb20        | zinc finger and BTB domain containing 20            | 1.84        |
| 1456901_at   | NM_001164785  | Adamts20      | a disintegrin-like and metallopeptidase (reprolysin | 1.84        |
| 1421072_at   | NM_018826     | Irx5          | Iroquois related homeobox 5 (Drosophila)            | 1.84        |
| 1428853_at   | NM_008957     | Ptch1         | patched homolog 1                                   | 1.84        |
| 1448916_at   | NM_010756     | Mafg          | v-maf musculoaponeurotic fibrosarcoma               | 1.84        |
| 1424711_at   | NM_001033759  | Tmem2         | transmembrane protein 2                             | 1.84        |
| 1434499_a_at | NM_008492     | Ldhb          | lactate dehydrogenase B                             | 1.84        |
| 1416344_at   | NM_001017959  | Lamp2         | lysosomal-associated membrane protein 2             | 1.84        |
| 1434272_at   | NM_001177379  | Cpeb2         | cytoplasmic polyadenylation element binding         | 1.84        |
| 1428834_at   | NM_176933     | Dusp4         | dual specificity phosphatase 4                      | 1.83        |
| 1442021_at   | NM_010307     | Gnal          | guanine nucleotide binding protein, alpha           | 1.83        |
| 1435367_at   | NM_172632     | Mapk4         | mitogen-activated protein kinase 4                  | 1.83        |
| 1423640_at   | NM_001163032  | Synpr         | synaptoporin                                        | 1.83        |
| 1429658_a_at | NM_008017     | Smc2          | structural maintenance of chromosomes 2             | 1.83        |
| 1456640_at   | NM_001146299  | Sh3rf2        | SH3 domain containing ring finger 2                 | 1.83        |
| 1448237_x_at | NM_008492     | Ldhb          | lactate dehydrogenase B                             | 1.83        |
| 1453006_at   | NM_028263     | Fgfbp3        | fibroblast growth factor binding protein 3          | 1.82        |
| 1415993_at   | NM_009270     | Sqle          | squalene epoxidase                                  | 1.82        |
| 1415877_at   | NM_001136086  | Dpysl3        | dihydropyrimidinase-like 3                          | 1.82        |
| 1447836_x_at | XR_105537     | 4921525O09Rik | RIKEN cDNA 4921525O09 gene                          | 1.82        |
| 1455235_x_at | NM_008492     | Ldhb          | lactate dehydrogenase B                             | 1.82        |
| 1454926_at   | NM_172430     | Sphkap        | SPHK1 interactor, AKAP domain containing            | 1.82        |
| 1453840_at   | NM_008774     | Pabpc1        | poly(A) binding protein, cytoplasmic 1              | 1.82        |
| 1416840_at   | NM_001166635  | Mid1ip1       | Mid1 interacting protein 1 (gastrulation specific   | 1.82        |
| 1452951_at   | NM_001162906  | 2410089E03Rik | RIKEN cDNA 2410089E03 gene                          | 1.82        |
| 1434484_at   | NM_183249     | 1100001G20Rik | RIKEN cDNA 1100001G20 gene                          | 1.82        |
| 1443485_at   | NM_001122889  | Epha7         | Eph receptor A7                                     | 1.82        |
| 1437718_x_at | NM_021355     | Fmod          | fibromodulin                                        | 1.81        |
| 1417420_at   | NM_007631     | Ccnd1         | cyclin D1                                           | 1.81        |
| 1459713_s_at | NM_178642     | Ano1          | anoctamin 1, calcium activated chloride channel     | 1.81        |
| 1437685_x_at | NM_021355     | Fmod          | fibromodulin                                        | 1.81        |
| 1454890_at   | NM_153319     | Amot          | angiomin                                            | 1.81        |
| 1419724_at   | NM_010100     | Edar          | ectodysplasin-A receptor                            | 1.81        |
| 1424969_s_at | NM_029692     | Upp2          | uridine phosphorylase 2                             | 1.80        |
| 1460070_at   | BB177017      | ---           |                                                     | 1.80        |
| 1441111_at   | NM_001166030  | Mylk4         | myosin light chain kinase family, member 4          | 1.80        |
| 1450646_at   | NM_020010     | Cyp51         | cytochrome P450, family 51                          | 1.80        |
| 1445597_s_at | NM_139269     | Pla2g16       | phospholipase A2, group XVI                         | 1.80        |
| 1453002_at   | NM_009234     | Sox11         | SRY-box containing gene 11                          | 1.80        |
| 1431335_a_at | NM_023395     | Wfdc1         | WAP four-disulfide core domain 1                    | 1.80        |

| Probe set    | Accession No. | Symbol           | Gene Title                                         | Fold Change |
|--------------|---------------|------------------|----------------------------------------------------|-------------|
| 1451457_at   | NM_172769     | Sc5d             | sterol-C5-desaturase (fungal ERG3, delta-5-        | 1.80        |
| 1420394_s_at | NM_008147     | Gp49a /// Lilrb4 | glycoprotein 49 A /// leukocyte immunoglobulin-    | 1.80        |
| 1422024_at   | NM_008026     | Fli1             | Friend leukemia integration 1                      | 1.79        |
| 1423250_a_at | NM_009367     | Tgfb2            | transforming growth factor, beta 2                 | 1.79        |
| 1443471_at   | NM_019778     | Zbtb20           | zinc finger and BTB domain containing 20           | 1.79        |
| 1434360_s_at | NM_008981     | Ptpg             | protein tyrosine phosphatase, receptor type, G     | 1.79        |
| 1424097_at   | NM_029001     | Elovl7           | ELOVL family member 7, elongation of long chain    | 1.79        |
| 1415855_at   | NM_013598     | Kitl             | kit ligand                                         | 1.79        |
| 1436698_x_at | NM_001001183  | Tmem204          | transmembrane protein 204                          | 1.79        |
| 1450080_at   | NM_028375     | Cxx1c            | CAAX box 1 homolog C (human)                       | 1.79        |
| 1417625_s_at | NM_007722     | Cxcr7            | chemokine (C-X-C motif) receptor 7                 | 1.78        |
| 1448975_s_at | NM_031192     | Ren1 /// Ren2    | renin 1 structural /// renin 2 tandem duplication  | 1.78        |
| 1428433_at   | NM_001136065  | Hipk2            | homeodomain interacting protein kinase 2           | 1.78        |
| 1417040_a_at | NM_016778     | Bok              | BCL2-related ovarian killer protein                | 1.78        |
| 1451611_at   | NM_139269     | Pla2g16          | phospholipase A2, group XVI                        | 1.78        |
| 1418926_at   | NM_011546     | Zeb1             | zinc finger E-box binding homeobox 1               | 1.78        |
| 1418261_at   | NM_011518     | Sykb             | spleen tyrosine kinase                             | 1.78        |
| 1442659_at   | NM_001081377  | Pcdh9            | protocadherin 9                                    | 1.78        |
| 1446953_at   | BG073799      | ---              |                                                    | 1.78        |
| 1448777_at   | NM_008564     | Mcm2             | minichromosome maintenance deficient 2 mitotin     | 1.77        |
| 1429210_at   | NM_153393     | Col23a1          | collagen, type XXIII, alpha 1                      | 1.77        |
| 1452226_at   | NM_173867     | Rcc2             | regulator of chromosome condensation 2             | 1.77        |
| 1436593_at   | NM_198637     | 1700016K19Rik    | RIKEN cDNA 1700016K19 gene                         | 1.77        |
| 1418190_at   | NM_011134     | Pon1             | paraoxonase 1                                      | 1.77        |
| 1431028_a_at | NM_001114339  | Pank1            | pantothenate kinase 1                              | 1.77        |
| 1422483_a_at | NM_007808     | Cycc             | cytochrome c, somatic                              | 1.77        |
| 1446294_at   | NM_011544     | Tcf12            | Transcription factor 12                            | 1.77        |
| 1449198_a_at | NM_001035228  | St3gal5          | ST3 beta-galactoside alpha-2,3-sialyltransferase 5 | 1.77        |
| 1417047_at   | NM_138750     | Prom2            | prominin 2                                         | 1.76        |
| 1420056_s_at | NM_033398     | Jmjd6            | jumonji domain containing 6                        | 1.76        |
| 1420549_at   | NM_010259     | Gbp1             | guanylate binding protein 1                        | 1.76        |
| 1434411_at   | NM_007730     | Col12a1          | collagen, type XII, alpha 1                        | 1.76        |
| 1423594_a_at | NM_001136061  | Ednrb            | endothelin receptor type B                         | 1.76        |
| 1437422_at   | NM_009154     | Sema5a           | sema domain, seven thrombospondin repeats          | 1.76        |
| 1421354_at   | NM_008926     | Prkg2            | protein kinase, cGMP-dependent, type II            | 1.76        |
| 1438966_x_at | NM_021355     | Fmod             | fibromodulin                                       | 1.76        |
| 1441170_a_at | NM_001001602  | Dab2ip           | disabled homolog 2 (Drosophila) interacting        | 1.76        |
| 1418931_at   | NM_026328     | Reg4             | regenerating islet-derived family, member 4        | 1.76        |
| 1460695_a_at | NM_028079     | 2010111I01Rik    | RIKEN cDNA 2010111I01 gene                         | 1.76        |
| 1421299_a_at | NM_010703     | Lef1             | lymphoid enhancer binding factor 1                 | 1.75        |
| 1435848_at   | NM_001033347  | D430041D05Rik    | RIKEN cDNA D430041D05 gene                         | 1.75        |
| 1439278_at   | NM_019778     | Zbtb20           | zinc finger and BTB domain containing 20           | 1.75        |
| 1449522_at   | NM_009472     | Unc5c            | unc-5 homolog C (C. elegans)                       | 1.75        |
| 1436470_at   | NM_053271     | Rims2            | regulating synaptic membrane exocytosis 2          | 1.75        |
| 1450779_at   | NM_021272     | Fabp7            | fatty acid binding protein 7, brain                | 1.75        |

| Probe set    | Accession No. | Symbol        | Gene Title                                                        | Fold Change |
|--------------|---------------|---------------|-------------------------------------------------------------------|-------------|
| 1429552_at   | NM_027963     | Wdr16         | WD repeat domain 16                                               | 1.75        |
| 1426571_at   | NM_178642     | Ano1          | anoctamin 1, calcium activated chloride channel                   | 1.75        |
| 1453128_at   | NM_053247     | Lyve1         | lymphatic vessel endothelial hyaluronan receptor                  | 1.74        |
| 1435036_at   | NM_001081169  | Aspg          | asparaginase homolog (S. cerevisiae)                              | 1.74        |
| 1439024_at   | NM_026121     | Bag4          | BCL2-associated athanogene 4                                      | 1.74        |
| 1424761_at   | NM_146174     | Fam115c       | family with sequence similarity 115, member C                     | 1.74        |
| 1417871_at   | NM_010476     | Hsd17b7       | hydroxysteroid (17-beta) dehydrogenase 7                          | 1.74        |
| 1426044_a_at | NM_008859     | Prkcq         | protein kinase C, theta                                           | 1.74        |
| 1417144_at   | NM_134024     | Tubg1         | tubulin, gamma 1                                                  | 1.74        |
| 1417686_at   | NM_019516     | Lgals12       | lectin, galactose binding, soluble 12                             | 1.74        |
| 1458375_at   | NM_001033531  | Klhl32        | kelch-like 32 (Drosophila)                                        | 1.74        |
| 1433443_a_at | NM_145942     | Hmgcs1        | 3-hydroxy-3-methylglutaryl-Coenzyme A synthase                    | 1.74        |
| 1443939_at   | NM_001085549  | Gm12824       | predicted gene 12824                                              | 1.74        |
| 1429651_at   | NM_001007154  | Phactr3       | phosphatase and actin regulator 3                                 | 1.74        |
| 1422912_at   | NM_007554     | Bmp4          | bone morphogenetic protein 4                                      | 1.73        |
| 1453623_a_at | NM_009010     | Rad23a        | RAD23a homolog (S. cerevisiae)                                    | 1.73        |
| 1429214_at   | NM_029981     | Adamts12      | ADAMTS-like 2                                                     | 1.73        |
| 1449130_at   | NM_007639     | Cd1d1         | CD1d1 antigen                                                     | 1.73        |
| 1423478_at   | NM_008855     | Prkcb         | protein kinase C, beta                                            | 1.73        |
| 1438761_a_at | NM_013614     | Odc1          | ornithine decarboxylase, structural 1                             | 1.73        |
| 1460036_at   | NM_026887     | Ap1s2         | adaptor-related protein complex 1, sigma 2                        | 1.73        |
| 1426514_at   | NM_029935     | Chst15        | carbohydrate (N-acetylgalactosamine 4-sulfate 6-                  | 1.73        |
| 1440275_at   | NM_019732     | Runx3         | runt related transcription factor 3                               | 1.73        |
| 1455542_at   | NR_027923     | C630043F03Rik | RIKEN cDNA C630043F03 gene                                        | 1.73        |
| 1418773_at   | NM_021890     | Fads3         | fatty acid desaturase 3                                           | 1.73        |
| 1437598_at   | NM_019778     | Zbtb20        | zinc finger and BTB domain containing 20                          | 1.73        |
| 1448754_at   | NM_011254     | Rbp1          | retinol binding protein 1, cellular                               | 1.73        |
| 1436941_at   | NM_001134457  | Fam55c        | family with sequence similarity 55, member C                      | 1.73        |
| 1419004_s_at | NM_007534     | Bcl2a1a ///   | B-cell leukemia/lymphoma 2 related protein A1a                    | 1.73        |
| 1422504_at   | NM_010298     | Glrb          | glycine receptor, beta subunit                                    | 1.73        |
| 1456812_at   | NM_011994     | Abcd2         | ATP-binding cassette, sub-family D (ALD),                         | 1.73        |
| 1416178_a_at | NM_001163182  | Plekhb1       | pleckstrin homology domain containing, family B                   | 1.73        |
| 1429413_at   | NM_027468     | Cpm           | carboxypeptidase M                                                | 1.72        |
| 1427980_at   | NM_001163262  | 4933407C03Rik | RIKEN cDNA 4933407C03 gene                                        | 1.72        |
| 1418539_a_at | NM_011212     | Ptpre         | protein tyrosine phosphatase, receptor type, E                    | 1.72        |
| 1417732_at   | NM_013473     | Anxa8         | annexin A8                                                        | 1.72        |
| 1448698_at   | NM_007631     | Ccnd1         | cyclin D1                                                         | 1.72        |
| 1418436_at   | NM_016797     | Stx7          | syntaxin 7                                                        | 1.72        |
| 1418331_at   | NM_025402     | 1110031102Rik | RIKEN cDNA 1110031102 gene                                        | 1.72        |
| 1436499_at   | NM_001168525  | Sgms1         | sphingomyelin synthase 1                                          | 1.72        |
| 1418774_a_at | NM_001109757  | Atp7a         | ATPase, Cu <sup>++</sup> transporting, alpha polypeptide          | 1.72        |
| 1452887_at   | NM_028718     | Traf3ip1      | TRAF3 interacting protein 1                                       | 1.72        |
| 1450875_at   | NM_010338     | Gpr37         | G protein-coupled receptor 37                                     | 1.72        |
| 1424886_at   | NM_001014288  | Ptpd          | protein tyrosine phosphatase, receptor type, D                    | 1.72        |
| 1421286_a_at | NM_018731     | Atp4a         | ATPase, H <sup>+</sup> /K <sup>+</sup> exchanging, gastric, alpha | 1.72        |

| Probe set    | Accession No. | Symbol        | Gene Title                                       | Fold Change |
|--------------|---------------|---------------|--------------------------------------------------|-------------|
| 1430448_at   | XM_001005301  | 6720418B01Rik | RIKEN cDNA 6720418B01 gene                       | 1.72        |
| 1422852_at   | NM_019686     | Cib2          | calcium and integrin binding family member 2     | 1.72        |
| 1427118_at   | XM_003085066  | 5430421N21Rik | RIKEN cDNA 5430421N21 gene                       | 1.71        |
| 1422432_at   | NM_001037999  | Dbi           | diazepam binding inhibitor                       | 1.71        |
| 1460187_at   | NM_013834     | Sfrp1         | secreted frizzled-related protein 1              | 1.71        |
| 1440564_at   | NM_144944     | Prokr2        | prokineticin receptor 2                          | 1.71        |
| 1453129_a_at | NM_001163512  | Rgs12         | regulator of G-protein signaling 12              | 1.71        |
| 1437324_x_at | NM_021355     | Fmod          | fibromodulin                                     | 1.71        |
| 1454969_at   | NM_177139     | Lypd6         | LY6/PLAUR domain containing 6                    | 1.71        |
| 1438081_at   | NM_001085373  | Mcc           | mutated in colorectal cancers                    | 1.71        |
| 1419665_a_at | NM_019738     | Nupr1         | nuclear protein 1                                | 1.71        |
| 1427364_a_at | NM_013614     | Odc1          | ornithine decarboxylase, structural 1            | 1.71        |
| 1416835_s_at | NM_009665     | Amd1          | S-adenosylmethionine decarboxylase 1             | 1.71        |
| 1436808_x_at | NM_008566     | Mcm5          | minichromosome maintenance deficient 5, cell     | 1.71        |
| 1418260_at   | NM_015755     | Hunk          | hormonally upregulated Neu-associated kinase     | 1.70        |
| 1430762_at   | NM_177702     | 4833427G06Rik | RIKEN cDNA 4833427G06 gene                       | 1.70        |
| 1452118_at   | NM_001163734  | Rrp1b         | ribosomal RNA processing 1 homolog B (S.         | 1.70        |
| 1433615_at   | NM_178789     | Tmem117       | transmembrane protein 117                        | 1.70        |
| 1431416_a_at | NM_023844     | Jam2          | junction adhesion molecule 2                     | 1.70        |
| 1435021_at   | NM_001038701  | Gabbr3        | gamma-aminobutyric acid (GABA) A receptor,       | 1.70        |
| 1433968_a_at | NM_172694     | Megf9         | multiple EGF-like-domains 9                      | 1.70        |
| 1425282_at   | NM_001170643  | Rnf144b       | ring finger protein 144B                         | 1.70        |
| 1450973_s_at | NM_011941     | Mapkbp1       | mitogen-activated protein kinase binding protein | 1.70        |
| 1430779_at   | NM_001163348  | Ntn1          | netrin G1                                        | 1.70        |
| 1448346_at   | NM_007687     | Cfl1          | cofilin 1, non-muscle                            | 1.70        |
| 1420855_at   | NM_007925     | Eln           | elastin                                          | 1.70        |
| 1437996_s_at | NM_175651     | Cnpy1         | canopy 1 homolog (zebrafish)                     | 1.70        |
| 1437479_x_at | NM_011535     | Tbx3          | T-box 3                                          | 1.70        |
| 1448769_at   | NM_016752     | Slc35b1       | solute carrier family 35, member B1              | 1.70        |
| 1422699_at   | NM_007440     | Alox12        | arachidonate 12-lipoxygenase                     | 1.69        |
| 1422607_at   | NM_001163154  | Etv1          | ets variant gene 1                               | 1.69        |
| 1426282_at   | NM_172290     | Ntm           | neurotrimin                                      | 1.69        |
| 1416723_at   | NM_001083967  | Tcf4          | transcription factor 4                           | 1.69        |
| 1427059_at   | NM_172608     | Tmem184b      | transmembrane protein 184b                       | 1.69        |
| 1450391_a_at | NM_001166249  | Mgll          | monoglyceride lipase                             | 1.69        |
| 1437417_s_at | NM_001079844  | Gpc6          | glypican 6                                       | 1.69        |
| 1430533_a_at | NM_001165902  | Ctnnb1        | catenin (cadherin associated protein), beta 1    | 1.68        |
| 1426576_at   | NM_001168525  | Sgms1         | sphingomyelin synthase 1                         | 1.68        |
| 1433855_at   | NM_001170978  | Abat          | 4-aminobutyrate aminotransferase                 | 1.68        |
| 1456003_a_at | NM_018861     | Slc1a4        | solute carrier family 1 (glutamate/neutral amino | 1.68        |
| 1443601_at   | NM_001033791  | Gm12888       | Predicted gene 12888                             | 1.68        |
| 1449455_at   | NM_001172117  | Hck           | hemopoietic cell kinase                          | 1.68        |
| 1460419_a_at | NM_008855     | Prkcb         | protein kinase C, beta                           | 1.68        |
| 1423186_at   | NM_001122998  | Tiam2         | T-cell lymphoma invasion and metastasis 2        | 1.68        |
| 1453836_a_at | NM_001166249  | Mgll          | monoglyceride lipase                             | 1.68        |



| Probe set    | Accession No. | Symbol    | Gene Title                                         | Fold Change |
|--------------|---------------|-----------|----------------------------------------------------|-------------|
| 1436233_at   | NM_172793     | Btnl9     | butyrophilin-like 9                                | 1.68        |
| 1426510_at   | NM_178653     | Sccpdh    | saccharopine dehydrogenase (putative)              | 1.68        |
| 1443119_at   | NM_177328     | Grm7      | glutamate receptor, metabotropic 7                 | 1.67        |
| 1418237_s_at | NM_001109991  | Col18a1   | collagen, type XVIII, alpha 1                      | 1.67        |
| 1418982_at   | NM_007678     | Cebpa     | CCAAT/enhancer binding protein (C/EBP), alpha      | 1.67        |
| 1434427_a_at | NM_027258     | Rnf157    | ring finger protein 157                            | 1.67        |
| 1459847_x_at | NM_008115     | Gfra2     | glial cell line derived neurotrophic factor family | 1.67        |
| 1418835_at   | NM_009344     | Phlda1    | pleckstrin homology-like domain, family A,         | 1.67        |
| 1422820_at   | NM_001039507  | Lipe      | lipase, hormone sensitive                          | 1.67        |
| 1434320_at   | NM_001166033  | Gtf3c4    | general transcription factor IIIC, polypeptide 4   | 1.67        |
| 1419814_s_at | NM_011309     | S100a1    | S100 calcium binding protein A1                    | 1.67        |
| 1437933_at   | NM_020259     | Hhip      | Hedgehog-interacting protein                       | 1.67        |
| 1437471_at   | NM_153545     | Lrrc45    | leucine rich repeat containing 45                  | 1.67        |
| 1452092_at   | NM_029935     | Chst15    | carbohydrate (N-acetylgalactosamine 4-sulfate 6-   | 1.67        |
| 1449089_at   | NM_173440     | Nrip1     | nuclear receptor interacting protein 1             | 1.67        |
| 1426251_at   | NM_153107     | Cpz       | carboxypeptidase Z                                 | 1.67        |
| 1459838_s_at | NM_001017525  | Btbd11    | BTB (POZ) domain containing 11                     | 1.67        |
| 1449705_x_at | NM_008563     | Mcm3      | minichromosome maintenance deficient 3 (S.         | 1.67        |
| 1447930_at   | NM_013815     | Baz1a /// | bromodomain adjacent to zinc finger domain 1A      | 1.66        |
| 1451548_at   | NM_029692     | Upp2      | uridine phosphorylase 2                            | 1.66        |
| 1433445_x_at | NM_145942     | Hmgcs1    | 3-hydroxy-3-methylglutaryl-Coenzyme A synthase     | 1.66        |
| 1422545_at   | NM_009324     | Tbx2      | T-box 2                                            | 1.66        |
| 1427195_at   | NM_007885     | Slc26a2   | solute carrier family 26 (sulfate transporter),    | 1.66        |
| 1419606_a_at | NM_011618     | Tnnt1     | troponin T1, skeletal, slow                        | 1.66        |
| 1455383_at   | NM_001033478  | Fam47e    | family with sequence similarity 47, member E       | 1.66        |
| 1447311_at   | NM_009209     | Slc6a2    | solute carrier family 6 (neurotransmitter          | 1.66        |
| 1426896_at   | NM_021559     | Zfp191    | zinc finger protein 191                            | 1.66        |
| 1417695_a_at | NM_009230     | Soat1     | sterol O-acyltransferase 1                         | 1.66        |
| 1437864_at   | NM_197985     | Adipor2   | adiponectin receptor 2                             | 1.66        |
| 1434149_at   | NM_001083967  | Tcf4      | transcription factor 4                             | 1.65        |
| 1436576_at   | NM_175449     | Fam26f    | family with sequence similarity 26, member F       | 1.65        |
| 1423499_at   | NM_026408     | Sncap     | synuclein, alpha interacting protein (synphilin)   | 1.65        |
| 1452646_at   | NM_178111     | Trp53inp2 | transformation related protein 53 inducible        | 1.65        |
| 1436514_at   | NM_008150     | Gpc4      | glypican 4                                         | 1.65        |
| 1429637_at   | NM_133187     | Fam198b   | family with sequence similarity 198, member B      | 1.65        |
| 1436530_at   | NM_001081957  | Gm11428   | predicted gene 11428                               | 1.65        |
| 1417094_at   | NM_001146057  | Acot7     | acyl-CoA thioesterase 7                            | 1.65        |
| 1430128_a_at | NM_139292     | Reep6     | receptor accessory protein 6                       | 1.65        |
| 1440729_at   | NM_001159964  | Eps15     | epidermal growth factor receptor pathway           | 1.65        |
| 1422484_at   | NM_007808     | Cyts      | cytochrome c, somatic                              | 1.65        |
| 1428792_at   | NM_001164369  | Bcas1     | breast carcinoma amplified sequence 1              | 1.65        |
| 1423489_at   | NM_026178     | Mmd       | monocyte to macrophage differentiation-            | 1.65        |
| 1429682_at   | NM_001142952  | Fam46c    | family with sequence similarity 46, member C       | 1.65        |
| 1434196_at   | NM_021422     | Dnaja4    | DnaJ (Hsp40) homolog, subfamily A, member 4        | 1.65        |
| 1451547_at   | NM_027391     | Iyd       | iodotyrosine deiodinase                            | 1.65        |

| Probe set    | Accession No. | Symbol        | Gene Title                                          | Fold Change |
|--------------|---------------|---------------|-----------------------------------------------------|-------------|
| 1427167_at   | XM_003086849  | Armcx4 ///    | armadillo repeat containing, X-linked 4 ///         | 1.65        |
| 1423503_at   | NM_023277     | Jam3          | junction adhesion molecule 3                        | 1.65        |
| 1454295_at   | NM_173440     | Nrip1         | nuclear receptor interacting protein 1              | 1.64        |
| 1449002_at   | NM_013750     | Phlda3        | pleckstrin homology-like domain, family A,          | 1.64        |
| 1456022_at   | NM_001136065  | Hipk2         | homeodomain interacting protein kinase 2            | 1.64        |
| 1440206_at   | XR_106121     | A930024E05Rik | RIKEN cDNA A930024E05 gene                          | 1.64        |
| 1422788_at   | NM_021398     | Slc43a3       | solute carrier family 43, member 3                  | 1.64        |
| 1451344_at   | NM_146162     | Tmem119       | transmembrane protein 119                           | 1.64        |
| 1437421_at   | BB332988      | 6330509M05Rik | RIKEN cDNA 6330509M05 gene                          | 1.64        |
| 1428026_at   | NM_080455     | Tshz2         | teashirt zinc finger family member 2                | 1.64        |
| 1440759_at   | BB321369      | Gm10672       | predicted gene 10672                                | 1.64        |
| 1458492_x_at | NM_172290     | Ntm           | neurotrimin                                         | 1.64        |
| 1450922_a_at | NM_009367     | Tgfb2         | transforming growth factor, beta 2                  | 1.64        |
| 1452365_at   | NM_172753     | Csgalnact1    | chondroitin sulfate N-                              | 1.64        |
| 1419708_at   | NM_009526     | Wnt6          | wingless-related MMTV integration site 6            | 1.64        |
| 1419282_at   | NM_011331     | Ccl12         | chemokine (C-C motif) ligand 12                     | 1.64        |
| 1430152_at   | NM_001159964  | Eps15         | epidermal growth factor receptor pathway            | 1.64        |
| 1443870_at   | NM_001033336  | Abcc4         | ATP-binding cassette, sub-family C (CFTR/MRP),      | 1.64        |
| 1449291_a_at | NM_025705     | Dcbl1         | discoidin, CUB and LCCL domain containing 1         | 1.64        |
| 1419479_at   | NM_026907     | Sectm1b       | secreted and transmembrane 1B                       | 1.64        |
| 1436528_at   | NM_178929     | Kazald1       | Kazal-type serine peptidase inhibitor domain 1      | 1.64        |
| 1423877_at   | NM_028083     | Chaf1b        | chromatin assembly factor 1, subunit B (p60)        | 1.64        |
| 1458512_at   | NM_001083927  | Tle3          | transducin-like enhancer of split 3, homolog of     | 1.63        |
| 1437309_a_at | NM_001164223  | Rpa1          | replication protein A1                              | 1.63        |
| 1436509_at   | NM_175403     | Mlec          | malectin                                            | 1.63        |
| 1426446_at   | NM_001163760  | 6430548M08Rik | RIKEN cDNA 6430548M08 gene                          | 1.63        |
| 1416480_a_at | NM_001112668  | Gm9790 ///    | predicted gene 9790 ///<br>HIG1 domain family,      | 1.63        |
| 1446923_at   | BQ175779      | ---           |                                                     | 1.63        |
| 1426968_a_at | NM_133832     | Rdh10         | retinol dehydrogenase 10 (all-trans)                | 1.63        |
| 1422831_at   | NM_010181     | Fbn2          | fibrillin 2                                         | 1.63        |
| 1448647_at   | NM_008549     | Man2a1        | mannosidase 2, alpha 1                              | 1.63        |
| 1451352_s_at | NM_001171052  | Mta3          | metastasis associated 3                             | 1.63        |
| 1419300_at   | NM_010228     | Flt1          | FMS-like tyrosine kinase 1                          | 1.63        |
| 1451529_at   | NM_144838     | Sgtb          | small glutamine-rich tetratricopeptide repeat       | 1.63        |
| 1448443_at   | NM_009250     | Serpini1      | serine (or cysteine) peptidase inhibitor, clade I,  | 1.63        |
| 1423685_at   | NM_146217     | Aars          | alanyl-tRNA synthetase                              | 1.63        |
| 1456117_at   | NM_001163734  | Rrp1b         | ribosomal RNA processing 1 homolog B (S.            | 1.63        |
| 1443854_at   | NM_010402     | Hand2         | heart and neural crest derivatives expressed        | 1.63        |
| 1427205_x_at | NM_029586     | Ccdc46        | coiled-coil domain containing 46                    | 1.62        |
| 1455785_at   | NM_010595     | Kcna1         | potassium voltage-gated channel, shaker-related     | 1.62        |
| 1439041_at   | NM_172653     | Slc39a10      | solute carrier family 39 (zinc transporter), member | 1.62        |
| 1420699_at   | NM_020008     | Clec7a        | C-type lectin domain family 7, member a             | 1.62        |
| 1438431_at   | NM_011994     | Abcd2         | ATP-binding cassette, sub-family D (ALD),           | 1.62        |
| 1460062_at   | NM_177606     | Plekhh2       | pleckstrin homology domain containing, family H     | 1.62        |
| 1448395_at   | NM_013834     | Sfrp1         | secreted frizzled-related protein 1                 | 1.62        |

| Probe set    | Accession No. | Symbol           | Gene Title                                      | Fold Change |
|--------------|---------------|------------------|-------------------------------------------------|-------------|
| 1424762_at   | NM_001040631  | C1qtnf5 /// Mfrp | C1q and tumor necrosis factor related protein 5 | 1.62        |
| 1448433_a_at | NM_008788     | Pcolce           | procollagen C-endopeptidase enhancer protein    | 1.62        |
| 1424471_at   | NM_001177810  | Rapgef3          | Rap guanine nucleotide exchange factor (GEF) 3  | 1.62        |
| 1424098_at   | NM_029001     | Elovl7           | ELOVL family member 7, elongation of long chain | 1.62        |
| 1452771_s_at | NM_001033606  | Acsl3            | acyl-CoA synthetase long-chain family member 3  | 1.62        |
| 1434856_at   | NM_001081433  | Ankrd44          | ankyrin repeat domain 44                        | 1.62        |
| 1453418_at   | NM_027770     | Col24a1          | collagen, type XXIV, alpha 1                    | 1.61        |
| 1419666_x_at | NM_019738     | Nupr1            | nuclear protein 1                               | 1.61        |
| 1437284_at   | NM_021457     | Fzd1             | frizzled homolog 1 (Drosophila)                 | 1.61        |
| 1423293_at   | NM_001164223  | Rpa1             | replication protein A1                          | 1.61        |
| 1460247_a_at | NM_013787     | Skp2             | S-phase kinase-associated protein 2 (p45)       | 1.61        |
| 1421088_at   | NM_008150     | Gpc4             | glypican 4                                      | 1.61        |
| 1432176_a_at | NM_001146348  | Eng              | endoglin                                        | 1.61        |
| 1453008_at   | NM_001081156  | Trnp1            | TMF1-regulated nuclear protein 1                | 1.61        |
| 1419421_at   | NM_001110783  | Ank1             | ankyrin 1, erythroid                            | 1.61        |
| 1451827_a_at | NM_015760     | Nox4             | NADPH oxidase 4                                 | 1.61        |
| 1422533_at   | NM_020010     | Cyp51            | cytochrome P450, family 51                      | 1.61        |
| 1439849_at   | NM_001085549  | Gm12824          | predicted gene 12824                            | 1.61        |
| 1421063_s_at | NM_001082961  | Snrpn /// Snurf  | small nuclear ribonucleoprotein N /// SNRPN     | 1.61        |
| 1440056_at   | BB426260      | ---              |                                                 | 1.61        |
| 1418969_at   | NM_013787     | Skp2             | S-phase kinase-associated protein 2 (p45)       | 1.61        |
| 1426657_s_at | NM_016966     | Gm8096 ///       | 3-phosphoglycerate dehydrogenase pseudogene     | 1.61        |
| 1418484_at   | NM_011902     | Tekt2            | tektin 2                                        | 1.61        |
| 1435323_a_at | NM_153546     | Mboat1           | membrane bound O-acyltransferase domain         | 1.61        |
| 1439396_x_at | NM_010271     | Gpd1             | glycerol-3-phosphate dehydrogenase 1 (soluble)  | 1.61        |
| 1421830_at   | NM_001177602  | Ak4              | adenylate kinase 4                              | 1.61        |
| 1419112_at   | NM_008702     | Nlk              | nemo like kinase                                | 1.61        |
| 1418910_at   | NM_007557     | Bmp7             | bone morphogenetic protein 7                    | 1.61        |
| 1420981_a_at | NM_001161769  | Lmo4             | LIM domain only 4                               | 1.61        |
| 1450010_at   | NM_019657     | Hsd17b12         | hydroxysteroid (17-beta) dehydrogenase 12       | 1.61        |
| 1442368_at   | NM_175429     | Kctd12b          | potassium channel tetramerisation domain        | 1.61        |
| 1449991_at   | NM_018729     | Cd244            | CD244 natural killer cell receptor 2B4          | 1.60        |
| 1422864_at   | NM_001111021  | Runx1            | runt related transcription factor 1             | 1.60        |
| 1448949_at   | NM_007607     | Car4             | carbonic anhydrase 4                            | 1.60        |
| 1425140_at   | NM_145381     | Lactb2           | lactamase, beta 2                               | 1.60        |
| 1451117_a_at | NM_028011     | Tom1l1           | target of myb1-like 1 (chicken)                 | 1.60        |
| 1419599_s_at | NM_026835     | Ms4a6d           | membrane-spanning 4-domains, subfamily A,       | 1.60        |
| 1456769_at   | NM_028207     | Dusp3            | dual specificity phosphatase 3 (vaccinia virus  | 1.60        |
| 1442144_at   | NM_080595     | Emid1            | EMI domain containing 1                         | 1.60        |
| 1434054_at   | NM_010756     | Mafg             | v-maf musculoaponeurotic fibrosarcoma           | 1.60        |
| 1453855_at   | NM_026280     | Mxra7            | matrix-remodelling associated 7                 | 1.60        |
| 1418243_at   | NM_007995     | Fcna             | ficolin A                                       | 1.60        |
| 1417400_at   | NM_001166408  | Rai14            | retinoic acid induced 14                        | 1.60        |
| 1442308_at   | NM_001102611  | Smyd4            | SET and MYND domain containing 4                | 1.60        |
| 1426805_at   | NM_001174078  | Smarca4          | SWI/SNF related, matrix associated, actin       | 1.60        |

| Probe set    | Accession No. | Symbol         | Gene Title                                                | Fold Change |
|--------------|---------------|----------------|-----------------------------------------------------------|-------------|
| 1421844_at   | NM_001159317  | Il1rap         | interleukin 1 receptor accessory protein                  | 1.60        |
| 1435472_at   | NM_032396     | Kremen1        | kringle containing transmembrane protein 1                | 1.59        |
| 1450813_a_at | NM_001112702  | Tnni1          | troponin I, skeletal, slow 1                              | 1.59        |
| 1429830_a_at | NM_001111060  | Cd59a          | CD59a antigen                                             | 1.59        |
| 1454930_at   | NM_173038     | Tbcel          | tubulin folding cofactor E-like                           | 1.59        |
| 1453419_at   | NM_008624     | Mras           | muscle and microspikes RAS                                | 1.59        |
| 1444512_at   | NM_172525     | Arhgap29       | Rho GTPase activating protein 29                          | 1.59        |
| 1449372_at   | NM_008929     | Dnajc3         | DnaJ (Hsp40) homolog, subfamily C, member 3               | 1.59        |
| 1456071_a_at | NM_007808     | Cycs           | cytochrome c, somatic                                     | 1.59        |
| 1436030_at   | NM_198037     | Cachd1         | cache domain containing 1                                 | 1.59        |
| 1453191_at   | NM_025685     | Col27a1        | collagen, type XXVII, alpha 1                             | 1.59        |
| 1453582_at   | NM_001025566  | Chka           | choline kinase alpha                                      | 1.59        |
| 1421252_a_at | NM_001033713  | Mef2a          | myocyte enhancer factor 2A                                | 1.59        |
| 1460412_at   | NM_024237     | Fbln7          | fibulin 7                                                 | 1.58        |
| 1433446_at   | NM_145942     | Hmgcs1         | 3-hydroxy-3-methylglutaryl-Coenzyme A synthase            | 1.58        |
| 1418248_at   | NM_013463     | Gla            | galactosidase, alpha                                      | 1.58        |
| 1449590_a_at | NM_008624     | Mras           | muscle and microspikes RAS                                | 1.58        |
| 1456406_at   | XR_106194     | Gm14964        | predicted gene 14964                                      | 1.58        |
| 1432129_a_at | NM_001025570  | Prrx1          | paired related homeobox 1                                 | 1.58        |
| 1437650_at   | NM_175537     | C730026J16 /// | hypothetical protein C730026J16 /// zinc finger           | 1.58        |
| 1449559_at   | NM_013601     | Msx2           | homeobox, msh-like 2                                      | 1.58        |
| 1417434_at   | NM_001145820  | Gpd2           | glycerol phosphate dehydrogenase 2,                       | 1.58        |
| 1449586_at   | NM_019645     | Pkp1           | plakophilin 1                                             | 1.58        |
| 1448330_at   | NM_010358     | Gstm1          | glutathione S-transferase, mu 1                           | 1.58        |
| 1415854_at   | NM_013598     | Kitl           | kit ligand                                                | 1.58        |
| 1431179_at   | NM_053103     | Entpd7         | ectonucleoside triphosphate diphosphohydrolase            | 1.58        |
| 1456080_a_at | NM_012032     | Serinc3        | serine incorporator 3                                     | 1.58        |
| 1416702_at   | NM_009250     | Serpini1       | serine (or cysteine) peptidase inhibitor, clade I,        | 1.58        |
| 1423627_at   | NM_008706     | Nqo1           | NAD(P)H dehydrogenase, quinone 1                          | 1.58        |
| 1444176_at   | NM_175406     | Atp6v0d2       | ATPase, H <sup>+</sup> transporting, lysosomal V0 subunit | 1.58        |
| 1457724_at   | NM_009984     | Ctsl           | cathepsin L                                               | 1.58        |
| 1438040_a_at | NM_011631     | Hsp90b1        | heat shock protein 90, beta (Grp94), member 1             | 1.57        |
| 1422631_at   | NM_013464     | Ahr            | aryl-hydrocarbon receptor                                 | 1.57        |
| 1427527_a_at | NM_008970     | Pthlh          | parathyroid hormone-like peptide                          | 1.57        |
| 1443824_s_at | NM_053070     | Car7           | carbonic anhydrase 7                                      | 1.57        |
| 1425225_at   | NM_144559     | Fcgr4          | Fc receptor, IgG, low affinity IV                         | 1.57        |
| 1453015_at   | NM_001163262  | 4933407C03Rik  | RIKEN cDNA 4933407C03 gene                                | 1.57        |
| 1450106_a_at | NM_001163394  | Evl            | Ena-vasodilator stimulated phosphoprotein                 | 1.57        |
| 1421594_a_at | NM_001040085  | Syt12          | synaptotagmin-like 2                                      | 1.57        |
| 1460241_a_at | NM_001035228  | St3gal5        | ST3 beta-galactoside alpha-2,3-sialyltransferase 5        | 1.57        |
| 1428869_at   | NM_001039351  | Nolc1          | nucleolar and coiled-body phosphoprotein 1                | 1.57        |
| 1436316_at   | NM_021366     | Klf13          | Kruppel-like factor 13                                    | 1.57        |
| 1424653_at   | NM_197996     | Tspan15        | tetraspanin 15                                            | 1.57        |
| 1433444_at   | NM_145942     | Hmgcs1         | 3-hydroxy-3-methylglutaryl-Coenzyme A synthase            | 1.57        |
| 1426813_at   | NM_181470     | Ltv1           | LTV1 homolog (S. cerevisiae)                              | 1.57        |

| Probe set    | Accession No. | Symbol          | Gene Title                                         | Fold Change |
|--------------|---------------|-----------------|----------------------------------------------------|-------------|
| 1433653_at   | NM_153782     | Fam20a          | family with sequence similarity 20, member A       | 1.56        |
| 1448390_a_at | NM_001172424  | Dhrs3           | dehydrogenase/reductase (SDR family) member 3      | 1.56        |
| 1460330_at   | NM_013470     | Anxa3           | annexin A3                                         | 1.56        |
| 1427277_at   | NM_009189     | Six1            | sine oculis-related homeobox 1 homolog             | 1.56        |
| 1425784_a_at | NM_001038612  | Olfm1           | olfactomedin 1                                     | 1.56        |
| 1424318_at   | NM_173752     | 1110067D22Rik   | RIKEN cDNA 1110067D22 gene                         | 1.56        |
| 1451394_at   | NM_001136060  | Dpp6            | dipeptidylpeptidase 6                              | 1.56        |
| 1452240_at   | NM_001146292  | Celf4           | CUGBP, Elav-like family member 4                   | 1.56        |
| 1426110_a_at | NM_010336     | Lpar1           | lysophosphatidic acid receptor 1                   | 1.56        |
| 1444946_at   | BG072280      | ---             |                                                    | 1.56        |
| 1416199_at   | NM_001145831  | Kifc3           | kinesin family member C3                           | 1.56        |
| 1422964_at   | NM_009010     | Rad23a          | RAD23a homolog (S. cerevisiae)                     | 1.56        |
| 1422620_s_at | NM_008247     | Ppap2a          | phosphatidic acid phosphatase type 2A              | 1.56        |
| 1452317_at   | NM_008270     | Hoxb9           | homeobox B9                                        | 1.56        |
| 1451322_at   | NM_181588     | Cmbl            | carboxymethylenebutenolidase-like                  | 1.56        |
| 1447742_at   | NM_010686     | Laptm5          | lysosomal-associated protein transmembrane 5       | 1.56        |
| 1454606_at   | NM_178682     | 4933426M11Rik   | RIKEN cDNA 4933426M11 gene                         | 1.56        |
| 1419692_a_at | NM_008521     | Ltc4s           | leukotriene C4 synthase                            | 1.56        |
| 1416235_at   | NM_133807     | Lrrc59          | leucine rich repeat containing 59                  | 1.55        |
| 1427670_a_at | NM_011544     | Tcf12           | transcription factor 12                            | 1.55        |
| 1424367_a_at | NM_001164086  | Homer2          | homer homolog 2 (Drosophila)                       | 1.55        |
| 1437445_at   | NM_001039104  | Trpm1           | transient receptor potential cation channel,       | 1.55        |
| 1424110_a_at | NM_008704     | Nme1            | non-metastatic cells 1, protein (NM23A)            | 1.55        |
| 1430781_at   | NM_030187     | Ak7             | adenylate kinase 7                                 | 1.55        |
| 1415999_at   | NM_010423     | Hey1            | hairy/enhancer-of-split related with YRPW motif 1  | 1.55        |
| 1452474_a_at | NM_181728     | Art3            | ADP-ribosyltransferase 3                           | 1.55        |
| 1448397_at   | NM_001010937  | Gjb6            | gap junction protein, beta 6                       | 1.55        |
| 1434046_at   | NM_001004174  | AA467197        | expressed sequence AA467197                        | 1.55        |
| 1455976_x_at | NM_001037999  | Dbi             | diazepam binding inhibitor                         | 1.55        |
| 1455689_at   | NM_175284     | Fzd10           | frizzled homolog 10 (Drosophila)                   | 1.55        |
| 1455074_at   | NM_025769     | Efcab1          | EF hand calcium binding domain 1                   | 1.55        |
| 1442058_s_at | NM_008949     | Psmc3ip         | proteasome (prosome, macropain) 26S subunit,       | 1.55        |
| 1431591_s_at | NM_015783     | Gm9706 ///      | predicted gene 9706 /// ISG15 ubiquitin-like       | 1.55        |
| 1423396_at   | NM_007428     | Agt             | angiotensinogen (serpin peptidase inhibitor, clade | 1.55        |
| 1448729_a_at | NM_011129     | 41156           | septin 4                                           | 1.55        |
| 1431798_a_at | NM_027875     | Syde1           | synapse defective 1, Rho GTPase, homolog 1 (C.     | 1.54        |
| 1449030_at   | NM_001111015  | Syn2            | synapsin II                                        | 1.54        |
| 1422474_at   | NM_001177980  | Pde4b           | phosphodiesterase 4B, cAMP specific                | 1.54        |
| 1452011_a_at | NM_026430     | Uxs1            | UDP-glucuronate decarboxylase 1                    | 1.54        |
| 1428384_at   | NM_026821     | D4Bwg0951e      | DNA segment, Chr 4, Brigham & Women's              | 1.54        |
| 1428821_at   | NM_026212     | Agpat2          | 1-acylglycerol-3-phosphate O-acyltransferase 2     | 1.54        |
| 1438030_at   | NM_001166493  | Rasgrp3         | RAS, guanyl releasing protein 3                    | 1.54        |
| 1441831_x_at | NM_016691     | Clcn5           | chloride channel 5                                 | 1.54        |
| 1423816_at   | NM_001018063  | Cxx1a /// Cxx1b | CAAX box 1 homolog A (human) /// CAAX box 1        | 1.54        |
| 1426219_at   | NM_011327     | Scp2            | sterol carrier protein 2, liver                    | 1.54        |

| Probe set    | Accession No. | Symbol        | Gene Title                                         | Fold Change |
|--------------|---------------|---------------|----------------------------------------------------|-------------|
| 1429907_at   | NM_028567     | 1700094D03Rik | RIKEN cDNA 1700094D03 gene                         | 1.54        |
| 1418061_at   | NM_013589     | Ltbp2         | latent transforming growth factor beta binding     | 1.54        |
| 1421093_at   | NM_017394     | Slc7a10       | solute carrier family 7 (cationic amino acid       | 1.54        |
| 1453084_s_at | NM_027174     | Col22a1       | collagen, type XXII, alpha 1                       | 1.54        |
| 1444242_at   | NM_033314     | Slco2a1       | Solute carrier organic anion transporter family,   | 1.54        |
| 1422619_at   | NM_008247     | Ppap2a        | phosphatidic acid phosphatase type 2A              | 1.54        |
| 1421834_at   | NM_008846     | Pip5k1b       | phosphatidylinositol-4-phosphate 5-kinase, type 1  | 1.54        |
| 1434399_at   | NM_001161767  | Galnt6        | UDP-N-acetyl-alpha-D-galactosamine:polypeptide     | 1.54        |
| 1423047_at   | NM_023764     | Tollip        | toll interacting protein                           | 1.54        |
| 1423563_at   | NM_030890     | Prrt1         | proline-rich transmembrane protein 1               | 1.54        |
| 1448564_at   | NM_011870     | Cib1          | calcium and integrin binding 1 (calmyrin)          | 1.54        |
| 1434326_x_at | NM_175484     | Coro2b        | coronin, actin binding protein, 2B                 | 1.54        |
| 1434263_at   | NM_028657     | F630110N24Rik | RIKEN cDNA F630110N24 gene                         | 1.54        |
| 1437012_x_at | NM_001177810  | Rapgef3       | Rap guanine nucleotide exchange factor (GEF) 3     | 1.54        |
| 1418469_at   | NM_173440     | Nrip1         | nuclear receptor interacting protein 1             | 1.54        |
| 1428354_at   | NM_001080932  | Foxk2         | forkhead box K2                                    | 1.54        |
| 1416416_x_at | NM_010358     | Gstm1         | glutathione S-transferase, mu 1                    | 1.53        |
| 1420334_at   | NM_001083902  | Slc12a8       | solute carrier family 12 (potassium/chloride       | 1.53        |
| 1451716_at   | NM_010658     | Mafb          | v-maf musculoaponeurotic fibrosarcoma              | 1.53        |
| 1424863_a_at | NM_001136065  | Hipk2         | homeodomain interacting protein kinase 2           | 1.53        |
| 1456555_at   | NM_181816     | Ccdc67        | coiled-coil domain containing 67                   | 1.53        |
| 1453087_at   | AK018107      | 6330403L08Rik | RIKEN cDNA 6330403L08 gene                         | 1.53        |
| 1438133_a_at | NM_010516     | Cyr61         | cysteine rich protein 61                           | 1.53        |
| 1417411_at   | NM_021432     | Nap1l5        | nucleosome assembly protein 1-like 5               | 1.53        |
| 1420401_a_at | NM_019511     | Ramp3         | receptor (calcitonin) activity modifying protein 3 | 1.53        |
| 1435537_at   | NM_001014288  | Ptprd         | protein tyrosine phosphatase, receptor type, D     | 1.53        |
| 1457508_at   | BB410003      | C430003N24Rik | RIKEN cDNA C430003N24 gene                         | 1.53        |
| 1418715_at   | NM_001114339  | Pank1         | pantothenate kinase 1                              | 1.53        |
| 1450945_at   | NM_011101     | Prkca         | protein kinase C, alpha                            | 1.53        |
| 1416214_at   | NM_008565     | Mcm4          | minichromosome maintenance deficient 4             | 1.53        |
| 1424291_at   | NM_172410     | Nup93         | nucleoporin 93                                     | 1.52        |
| 1424755_at   | NM_146001     | Hip1          | huntingtin interacting protein 1                   | 1.52        |
| 1422544_at   | NM_019472     | Myo10         | myosin X                                           | 1.52        |
| 1418412_at   | NM_009413     | Tpd52l1       | tumor protein D52-like 1                           | 1.52        |
| 1417696_at   | NM_009230     | Soat1         | sterol O-acyltransferase 1                         | 1.52        |
| 1422466_at   | NM_008750     | Nxn           | nucleoredoxin                                      | 1.52        |
| 1448851_a_at | NM_016775     | Dnajc5        | DnaJ (Hsp40) homolog, subfamily C, member 5        | 1.52        |
| 1428813_a_at | NM_001190385  | Caly          | calcyon neuron-specific vesicular protein          | 1.52        |
| 1437886_at   | NM_183390     | Klhl6         | kelch-like 6 (Drosophila)                          | 1.52        |
| 1419550_a_at | NM_016866     | Stk39         | serine/threonine kinase 39, STE20/SPS1 homolog     | 1.52        |
| 1437319_at   | NM_001081153  | Unc13c        | unc-13 homolog C (C. elegans)                      | 1.52        |
| 1428386_at   | NM_001033606  | Acsl3         | acyl-CoA synthetase long-chain family member 3     | 1.52        |
| 1435908_at   | NM_020253     | Nrxn2         | neurexin II                                        | 1.52        |
| 1424584_a_at | NM_145824     | Ranbp10       | RAN binding protein 10                             | 1.52        |
| 1438212_at   | NM_176972     | Usp37         | ubiquitin specific peptidase 37                    | 1.52        |

| Probe set    | Accession No. | Symbol        | Gene Title                                           | Fold Change |
|--------------|---------------|---------------|------------------------------------------------------|-------------|
| 1449843_at   | NM_009181     | St8sia2       | ST8 alpha-N-acetyl-neuraminide alpha-2,8-            | 1.52        |
| 1418127_a_at | NM_012019     | Aifm1         | apoptosis-inducing factor, mitochondrion-            | 1.51        |
| 1456146_at   | BI735554      | 2210411A11Rik | RIKEN cDNA 2210411A11 gene                           | 1.51        |
| 1450904_at   | NM_025335     | Tmem167       | transmembrane protein 167                            | 1.51        |
| 1451083_s_at | NM_146217     | Aars          | alanyl-tRNA synthetase                               | 1.51        |
| 1458984_at   | BI794701      | ---           |                                                      | 1.51        |
| 1448024_at   | NM_001039181  | Npr3          | natriuretic peptide receptor 3                       | 1.51        |
| 1420295_x_at | NM_016691     | Clcn5         | chloride channel 5                                   | 1.51        |
| 1428307_at   | NM_028031     | Zdhhc13       | zinc finger, DHHC domain containing 13               | 1.51        |
| 1416241_at   | NM_024206     | Sec13         | SEC13 homolog ( <i>S. cerevisiae</i> )               | 1.51        |
| 1429330_at   | NM_010251     | Gabra4        | gamma-aminobutyric acid (GABA) A receptor,           | 1.51        |
| 1439619_at   | NM_011544     | Tcf12         | transcription factor 12                              | 1.51        |
| 1417929_at   | NM_016972     | Slc7a8        | solute carrier family 7 (cationic amino acid         | 1.51        |
| 1437695_at   | NM_144944     | Prokr2        | prokineticin receptor 2                              | 1.51        |
| 1456481_at   | NM_177775     | Esyt3         | extended synaptotagmin-like protein 3                | 1.51        |
| 1427229_at   | NM_008255     | Hmgcr         | 3-hydroxy-3-methylglutaryl-Coenzyme A                | 1.51        |
| 1441113_at   | XR_106375     | A430071A18Rik | RIKEN cDNA A430071A18 gene                           | 1.51        |
| 1416064_a_at | NM_001163434  | Hspa5         | heat shock protein 5                                 | 1.51        |
| 1455951_at   | NM_001003913  | Mars          | methionine-tRNA synthetase                           | 1.50        |
| 1421158_at   | NM_026599     | Cgnl1         | cingulin-like 1                                      | 1.50        |
| 1450923_at   | NM_009367     | Tgfb2         | transforming growth factor, beta 2                   | 1.50        |
| 1437397_at   | NM_011169     | Prlr          | prolactin receptor                                   | 1.50        |
| 1441505_at   | BB211484      | ---           |                                                      | 1.50        |
| 1419097_a_at | NM_013515     | Stom          | stomatin                                             | 1.50        |
| 1418025_at   | NM_011498     | Bhlhe40       | basic helix-loop-helix family, member e40            | -1.51       |
| 1440343_at   | NM_153587     | Rps6ka5       | ribosomal protein S6 kinase, polypeptide 5           | -1.51       |
| 1418683_at   | NM_011698     | Lin7b         | lin-7 homolog B ( <i>C. elegans</i> )                | -1.51       |
| 1449579_at   | NM_013709     | Sh3yl1        | Sh3 domain YSC-like 1                                | -1.51       |
| 1438169_a_at | NM_145148     | Frmd4b        | FERM domain containing 4B                            | -1.52       |
| 1452232_at   | NM_001167981  | Galnt7        | UDP-N-acetyl-alpha-D-galactosamine:                  | -1.52       |
| 1434931_at   | NM_001042752  | Neo1          | neogenin                                             | -1.52       |
| 1415975_at   | NM_025821     | Carhsp1       | calcium regulated heat stable protein 1              | -1.52       |
| 1428176_at   | NM_010333     | S1pr2         | sphingosine-1-phosphate receptor 2                   | -1.52       |
| 1428391_at   | NM_144538     | Rab3il1       | RAB3A interacting protein (rabin3)-like 1            | -1.52       |
| 1438291_x_at | NM_026069     | LOC100502825  | 60S ribosomal protein L37-like /// ribosomal         | -1.52       |
| 1417009_at   | NM_023143     | C1ra          | complement component 1, r subcomponent A             | -1.52       |
| 1417797_a_at | NM_001083916  | 1810019J16Rik | RIKEN cDNA 1810019J16 gene                           | -1.52       |
| 1419133_at   | NM_025276     | Evpl          | envoplakin                                           | -1.52       |
| 1458341_x_at | NM_153422     | Pde5a         | phosphodiesterase 5A, cGMP-specific                  | -1.52       |
| 1451604_a_at | NM_009612     | Acvr1l        | activin A receptor, type II-like 1                   | -1.52       |
| 1437190_at   | NM_172891     | Styk1         | serine/threonine/tyrosine kinase 1                   | -1.52       |
| 1423803_s_at | NM_133831     | Gltsr2        | glioma tumor suppressor candidate region gene        | -1.52       |
| 1425182_x_at | NM_010114     | Klk1b22 ///   | kallikrein 1-related peptidase b22 /// kallikrein 1- | -1.52       |
| 1418345_at   | NM_001034097  | BC096441 ///  | cDNA sequence BC096441 /// tumor necrosis            | -1.52       |
| 1424915_s_at | NM_173735     | 2310044G17Rik | RIKEN cDNA 2310044G17 gene                           | -1.52       |

| Probe set    | Accession No. | Symbol        | Gene Title                                        | Fold Change |
|--------------|---------------|---------------|---------------------------------------------------|-------------|
| 1423831_at   | NM_001170555  | Prkag2        | protein kinase, AMP-activated, gamma 2 non-       | -1.52       |
| 1447858_x_at | NM_001008700  | Il4ra         | interleukin 4 receptor, alpha                     | -1.52       |
| 1417646_a_at | NM_024225     | Snx5          | sorting nexin 5                                   | -1.52       |
| 1417169_at   | NM_016808     | Usp2          | ubiquitin specific peptidase 2                    | -1.52       |
| 1429086_at   | NM_026496     | Gm16136 ///   | predicted gene 16136 /// grainyhead-like 2        | -1.52       |
| 1417639_at   | NM_019687     | Slc22a4       | solute carrier family 22 (organic cation          | -1.52       |
| 1416457_at   | NM_001190449  | Ddah2         | dimethylarginine dimethylaminohydrolase 2         | -1.52       |
| 1423132_a_at | NM_021552     | Nsa2          | NSA2 ribosome biogenesis homolog (S.              | -1.52       |
| 1435258_at   | NM_001040130  | Tmem141       | transmembrane protein 141                         | -1.52       |
| 1448694_at   | NM_010591     | Jun           | Jun oncogene                                      | -1.52       |
| 1438560_x_at | NM_009837     | Cct4          | chaperonin containing Tcp1, subunit 4 (delta)     | -1.52       |
| 1417667_a_at | NM_008961     | Pter          | phosphotriesterase related                        | -1.52       |
| 1428643_at   | NM_145128     | Mgat5         | mannoside acetylglucosaminyltransferase 5         | -1.52       |
| 1439962_at   | XM_896611     | 2310010J17Rik | RIKEN cDNA 2310010J17 gene                        | -1.53       |
| 1418259_a_at | NM_009849     | Entpd2        | ectonucleoside triphosphate diphosphohydrolase    | -1.53       |
| 1420357_s_at | NM_001081643  | LOC630164 /// | x-linked lymphocyte-regulated protein 3B-like /// | -1.53       |
| 1418984_at   | NM_001005784  | Inadl         | InaD-like (Drosophila)                            | -1.53       |
| 1435866_s_at | NM_178218     | Hist3h2a      | histone cluster 3, H2a                            | -1.53       |
| 1454850_at   | NM_178650     | Tbc1d10c      | TBC1 domain family, member 10c                    | -1.53       |
| 1435578_s_at | NM_010014     | Dab1          | disabled homolog 1 (Drosophila)                   | -1.53       |
| 1452426_x_at | BC004065      | ---           |                                                   | -1.53       |
| 1448735_at   | NM_001042611  | Cp            | ceruloplasmin                                     | -1.53       |
| 1438559_x_at | NM_152808     | Slc44a2       | solute carrier family 44, member 2                | -1.53       |
| 1440325_at   | AV332226      | ---           |                                                   | -1.53       |
| 1451249_at   | NM_001164559  | Trmt1         | TRM1 tRNA methyltransferase 1 homolog (S.         | -1.53       |
| 1416654_at   | NM_025286     | Slc31a2       | solute carrier family 31, member 2                | -1.53       |
| 1417409_at   | NM_010591     | Jun           | Jun oncogene                                      | -1.53       |
| 1437145_s_at | NM_026415     | 2310002J15Rik | RIKEN cDNA 2310002J15 gene                        | -1.53       |
| 1418712_at   | NM_021454     | Cdc42ep5      | CDC42 effector protein (Rho GTPase binding) 5     | -1.53       |
| 1438306_at   | NM_027934     | Rnf180        | ring finger protein 180                           | -1.53       |
| 1423153_x_at | NM_009888     | Cfh           | complement component factor h                     | -1.53       |
| 1426378_at   | NM_145625     | Eif4b         | eukaryotic translation initiation factor 4B       | -1.53       |
| 1435293_at   | NM_001007220  | Adam22        | a disintegrin and metallopeptidase domain 22      | -1.53       |
| 1439011_at   | XR_105469     | LOC100504475  | hypothetical LOC100504475                         | -1.53       |
| 1420388_at   | NM_008939     | Prss12        | protease, serine, 12 neurotrypsin (motopsin)      | -1.53       |
| 1419040_at   | NM_001163472  | Cyp2d22       | cytochrome P450, family 2, subfamily d,           | -1.53       |
| 1452657_at   | NM_026887     | Ap1s2         | adaptor-related protein complex 1, sigma 2        | -1.53       |
| 1456087_at   | NM_001122952  | Nfia          | nuclear factor I/A                                | -1.53       |
| 1435549_at   | NM_175130     | Trpm4         | transient receptor potential cation channel,      | -1.53       |
| 1419406_a_at | NM_001159289  | Bcl11a        | B-cell CLL/lymphoma 11A (zinc finger protein)     | -1.53       |
| 1450612_a_at | NM_008819     | Pemt          | phosphatidylethanolamine N-methyltransferase      | -1.53       |
| 1441206_at   | NM_080451     | Synpo2        | synaptopodin 2                                    | -1.53       |
| 1456258_at   | NM_010132     | Emx2          | empty spiracles homolog 2 (Drosophila)            | -1.53       |
| 1441105_at   | NR_033508     | Gm11110       | predicted gene 11110                              | -1.54       |
| 1423100_at   | NM_010234     | Fos           | FBJ osteosarcoma oncogene                         | -1.54       |



| Probe set    | Accession No. | Symbol        | Gene Title                                                        | Fold Change |
|--------------|---------------|---------------|-------------------------------------------------------------------|-------------|
| 1416675_s_at | NM_019676     | Plcd1         | phospholipase C, delta 1                                          | -1.54       |
| 1433843_at   | NM_021429     | Hs1bp3        | HCLS1 binding protein 3                                           | -1.54       |
| 1453639_s_at | NM_026714     | Ccdc163       | coiled-coil domain containing 163                                 | -1.54       |
| 1417933_at   | NM_008344     | Igfbp6        | insulin-like growth factor binding protein 6                      | -1.54       |
| 1435389_at   | NM_178256     | Reps2         | RALBP1 associated Eps domain containing                           | -1.54       |
| 1433769_at   | NM_001146059  | Als2cl        | ALS2 C-terminal like                                              | -1.54       |
| 1450850_at   | NM_009510     | Ezr           | ezrin                                                             | -1.54       |
| 1424023_at   | NM_145582     | Ctu1          | cytosolic thioridylase subunit 1 homolog (S.                      | -1.54       |
| 1433782_at   | NM_001193659  | Cldn12        | claudin 12                                                        | -1.54       |
| 1417455_at   | NM_009368     | Tgfb3         | transforming growth factor, beta 3                                | -1.54       |
| 1426380_at   | NM_145625     | Eif4b         | eukaryotic translation initiation factor 4B                       | -1.54       |
| 1429399_at   | NM_026301     | Rnf125        | ring finger protein 125                                           | -1.54       |
| 1426569_a_at | NM_001159544  | Frk           | fyn-related kinase                                                | -1.54       |
| 1437217_at   | NM_001012450  | Ankrd6        | ankyrin repeat domain 6                                           | -1.54       |
| 1448551_a_at | NM_030706     | Trim2         | tripartite motif-containing 2                                     | -1.54       |
| 1460204_at   | NM_001113460  | Tec           | tec protein tyrosine kinase                                       | -1.54       |
| 1436363_a_at | NM_001081981  | Nfix          | nuclear factor I/X                                                | -1.54       |
| 1416538_at   | NM_011734     | Siae          | sialic acid acetyltransferase                                     | -1.54       |
| 1425553_s_at | NM_145070     | Hip1r         | huntingtin interacting protein 1 related                          | -1.54       |
| 1423738_at   | NM_026936     | Oxa1l         | oxidase assembly 1-like                                           | -1.54       |
| 1420930_s_at | NM_018761     | Ctnnal1       | catenin (cadherin associated protein), alpha-like 1               | -1.54       |
| 1459348_at   | BB454472      | ---           |                                                                   | -1.54       |
| 1417661_at   | NM_025654     | Rdm1          | RAD52 motif 1                                                     | -1.54       |
| 1435261_at   | NM_198967     | Tmtc1         | transmembrane and tetratricopeptide repeat                        | -1.54       |
| 1432263_a_at | NM_001159529  | Cox7a2l       | cytochrome c oxidase subunit VIIa polypeptide 2-                  | -1.54       |
| 1459512_at   | BM123004      | ---           |                                                                   | -1.54       |
| 1438718_at   | NM_013518     | Fgf9          | fibroblast growth factor 9                                        | -1.54       |
| 1438635_x_at | NM_178699     | B930041F14Rik | RIKEN cDNA B930041F14 gene                                        | -1.54       |
| 1434828_at   | NM_001163567  | Fam102b       | family with sequence similarity 102, member B                     | -1.54       |
| 1424052_at   | NM_025920     | Thap4         | THAP domain containing 4                                          | -1.54       |
| 1438712_at   | NM_001093754  | Dennd2d       | DENN/MADD domain containing 2D                                    | -1.54       |
| 1440173_x_at | NM_011347     | Selp          | selectin, platelet                                                | -1.54       |
| 1455322_at   | NM_001047604  | Ttc21b        | tetratricopeptide repeat domain 21B                               | -1.54       |
| 1435893_at   | NM_001161420  | Vldlr         | very low density lipoprotein receptor                             | -1.55       |
| 1415997_at   | NM_001009935  | Txnip         | thioredoxin interacting protein                                   | -1.55       |
| 1432264_x_at | NM_001159529  | Cox7a2l       | cytochrome c oxidase subunit VIIa polypeptide 2-                  | -1.55       |
| 1451431_a_at | NM_001048227  | Dbn1dd2       | dysbindin (dystrobrevin binding protein 1)                        | -1.55       |
| 1422658_at   | NM_054066     | Plcz1         | phospholipase C, zeta 1                                           | -1.55       |
| 1434963_at   | NM_178652     | Supt3h        | suppressor of Ty 3 homolog (S. cerevisiae)                        | -1.55       |
| 1423222_at   | NM_026056     | Cap2          | CAP, adenylate cyclase-associated protein, 2                      | -1.55       |
| 1427501_at   | NM_175176     | 4922501L14Rik | RIKEN cDNA 4922501L14 gene                                        | -1.55       |
| 1434291_a_at | NM_011353     | Serf1         | small EDRK-rich factor 1                                          | -1.55       |
| 1432474_a_at | NM_027221     | Krtcap3       | keratinocyte associated protein 3                                 | -1.55       |
| 1438494_at   | NM_008285     | Hrh1          | histamine receptor H1                                             | -1.55       |
| 1419652_s_at | NM_025998     | Nkain1        | Na <sup>+</sup> /K <sup>+</sup> transporting ATPase interacting 1 | -1.55       |

| Probe set    | Accession No. | Symbol        | Gene Title                                          | Fold Change |
|--------------|---------------|---------------|-----------------------------------------------------|-------------|
| 1419231_s_at | NM_010661     | Krt12         | keratin 12                                          | -1.55       |
| 1436246_at   | AI849504      | ---           |                                                     | -1.55       |
| 1425162_at   | NM_001043354  | Rorb          | RAR-related orphan receptor beta                    | -1.55       |
| 1440359_at   | NM_173426     | Fam110b       | family with sequence similarity 110, member B       | -1.55       |
| 1416418_at   | NM_020590     | Gabarapl1     | gamma-aminobutyric acid (GABA) A receptor-          | -1.56       |
| 1420640_at   | NM_021310     | Jmy           | junction-mediating and regulatory protein           | -1.56       |
| 1441930_x_at | NM_012037     | Vat1          | Vesicle amine transport protein 1 homolog (T        | -1.56       |
| 1449799_s_at | NM_026163     | Pkp2          | plakophilin 2                                       | -1.56       |
| 1453321_at   | NM_001081416  | Fndc1         | fibronectin type III domain containing 1            | -1.56       |
| 1418449_at   | NM_133664     | Lad1          | ladinin                                             | -1.56       |
| 1452507_at   | NM_010057     | Dlx6          | distal-less homeobox 6                              | -1.56       |
| 1453168_at   | NM_001033148  | 1700029J07Rik | RIKEN cDNA 1700029J07 gene                          | -1.56       |
| 1430375_a_at | NM_001048179  | Ccl27a ///    | chemokine (C-C motif) ligand 27A ///<br>chemokine   | -1.56       |
| 1423891_at   | NM_133994     | Gstt3         | glutathione S-transferase, theta 3                  | -1.56       |
| 1451542_at   | NM_024186     | Ssbp2         | single-stranded DNA binding protein 2               | -1.56       |
| 1451121_a_at | NM_133831     | Gltscr2       | glioma tumor suppressor candidate region gene       | -1.56       |
| 1450404_at   | NM_011397     | Slc23a1       | solute carrier family 23 (nucleobase transporters), | -1.56       |
| 1435336_at   | NM_001004177  | Celsr2        | cadherin, EGF LAG seven-pass G-type receptor 2      | -1.56       |
| 1424468_s_at | NM_153537     | Phldb1        | pleckstrin homology-like domain, family B,          | -1.56       |
| 1419291_x_at | NR_002840     | Gas5          | growth arrest specific 5                            | -1.56       |
| 1436677_at   | NR_027819     | 1810032O08Rik | RIKEN cDNA 1810032O08 gene                          | -1.56       |
| 1454748_at   | NM_172607     | Naprt1        | nicotinate phosphoribosyltransferase domain         | -1.56       |
| 1419149_at   | NM_008871     | Serpine1      | serine (or cysteine) peptidase inhibitor, clade E,  | -1.56       |
| 1436689_a_at | NM_019993     | Aldh9a1       | aldehyde dehydrogenase 9, subfamily A1              | -1.56       |
| 1415874_at   | NM_011896     | Spry1         | sprouty homolog 1 (Drosophila)                      | -1.56       |
| 1418162_at   | NM_021297     | Tlr4          | toll-like receptor 4                                | -1.56       |
| 1440781_at   | BB333095      | B830007D08Rik | RIKEN cDNA B830007D08 gene                          | -1.56       |
| 1454666_at   | NM_008453     | Klf3          | Kruppel-like factor 3 (basic)                       | -1.56       |
| 1448690_at   | NM_008430     | Kcnk1         | potassium channel, subfamily K, member 1            | -1.56       |
| 1423717_at   | NM_021299     | Ak3           | adenylate kinase 3                                  | -1.56       |
| 1448400_a_at | NM_001130187  | Smarcd2       | SWI/SNF related, matrix associated, actin           | -1.56       |
| 1435763_at   | NM_172443     | Tbc1d16       | TBC1 domain family, member 16                       | -1.57       |
| 1452590_a_at | NM_207229     | Gm10393 ///   | predicted gene 10393 ///<br>placenta specific 9     | -1.57       |
| 1444646_at   | NM_172870     | Bnc2          | basonuclin 2                                        | -1.57       |
| 1460214_at   | NM_008791     | Pcp4          | Purkinje cell protein 4                             | -1.57       |
| 1428508_at   | NM_194334     | Tbc1d2b       | TBC1 domain family, member 2B                       | -1.57       |
| 1435339_at   | NM_146188     | Kctd15        | potassium channel tetramerisation domain            | -1.57       |
| 1419638_at   | NM_010111     | Efnb2         | ephrin B2                                           | -1.57       |
| 1418791_at   | NM_019535     | Sh3gl2        | SH3-domain GRB2-like 2                              | -1.57       |
| 1423861_at   | NM_175175     | Plekhf2       | pleckstrin homology domain containing, family F     | -1.57       |
| 1426743_at   | NM_145220     | Appl2         | adaptor protein, phosphotyrosine interaction, PH    | -1.57       |
| 1428484_at   | NM_001163645  | Osbpl3        | oxysterol binding protein-like 3                    | -1.57       |
| 1448665_at   | NM_007868     | Dmd           | dystrophin, muscular dystrophy                      | -1.57       |
| 1429360_at   | NM_008453     | Klf3          | Kruppel-like factor 3 (basic)                       | -1.57       |
| 1420362_a_at | NM_007546     | Bik           | BCL2-interacting killer                             | -1.57       |

| Probe set    | Accession No. | Symbol        | Gene Title                                            | Fold Change |
|--------------|---------------|---------------|-------------------------------------------------------|-------------|
| 1427230_at   | NM_178699     | B930041F14Rik | RIKEN cDNA B930041F14 gene                            | -1.57       |
| 1425179_at   | NM_009171     | Shmt1         | serine hydroxymethyltransferase 1 (soluble)           | -1.57       |
| 1425792_a_at | NM_011281     | Rorc          | RAR-related orphan receptor gamma                     | -1.57       |
| 1424942_a_at | NM_001177352  | Myc           | myelocytomatosis oncogene                             | -1.57       |
| 1447903_x_at | NM_026887     | Ap1s2         | adaptor-related protein complex 1, sigma 2            | -1.57       |
| 1424467_at   | NM_153537     | Phldb1        | pleckstrin homology-like domain, family B,            | -1.57       |
| 1418014_a_at | NM_022305     | B4galt1       | UDP-Gal:betaGlcNAc beta 1,4-                          | -1.57       |
| 1429089_s_at | NM_172884     | 2900026A02Rik | RIKEN cDNA 2900026A02 gene                            | -1.58       |
| 1450178_at   | NM_001079873  | Brdt          | bromodomain, testis-specific                          | -1.58       |
| 1427095_at   | NM_133974     | Cdcp1         | CUB domain containing protein 1                       | -1.58       |
| 1450910_at   | NM_026056     | Cap2          | CAP, adenylate cyclase-associated protein, 2          | -1.58       |
| 1437341_x_at | NM_001146318  | Cnp           | 2',3'-cyclic nucleotide 3' phosphodiesterase          | -1.58       |
| 1456925_at   | NM_001159561  | P2rx6         | purinergic receptor P2X, ligand-gated ion             | -1.58       |
| 1419239_at   | NM_011760     | Zfp54         | zinc finger protein 54                                | -1.58       |
| 1435605_at   | NM_001004365  | Actr3b        | ARP3 actin-related protein 3 homolog B (yeast)        | -1.58       |
| 1443736_at   | BG868839      | Gm13648       | predicted gene 13648                                  | -1.58       |
| 1424652_at   | NM_145570     | Fam176a       | family with sequence similarity 176, member A         | -1.58       |
| 1423996_a_at | NM_001008700  | Il4ra         | interleukin 4 receptor, alpha                         | -1.58       |
| 1421456_at   | NM_008772     | P2ry1         | purinergic receptor P2Y, G-protein coupled 1          | -1.58       |
| 1455747_at   | NM_011820     | Ggt5          | gamma-glutamyltransferase 5                           | -1.58       |
| 1433674_a_at | NR_002896     | Snhg1         | small nucleolar RNA host gene (non-protein            | -1.58       |
| 1419457_at   | NM_012026     | Rgnef         | Rho-guanine nucleotide exchange factor                | -1.58       |
| 1455722_at   | BB425316      | ---           |                                                       | -1.58       |
| 1438916_x_at | NR_015505     | 6720401G13Rik | RIKEN cDNA 6720401G13 gene                            | -1.58       |
| 1418294_at   | NM_019427     | Epb4.1l4b     | erythrocyte protein band 4.1-like 4b                  | -1.58       |
| 1436425_at   | NM_172872     | Kank4         | KN motif and ankyrin repeat domains 4                 | -1.58       |
| 1429625_at   | BM202541      | 2900054C01Rik | RIKEN cDNA 2900054C01 gene                            | -1.58       |
| 1417101_at   | NM_001002012  | Hspa2         | heat shock protein 2                                  | -1.58       |
| 1440431_at   | BB053468      | ---           |                                                       | -1.58       |
| 1424586_at   | NM_153078     | Ehbp1         | EH domain binding protein 1                           | -1.58       |
| 1434432_at   | NM_001007465  | Rffl          | ring finger and FYVE like domain containing           | -1.58       |
| 1436322_a_at | XR_105685     | 2810001A02Rik | RIKEN cDNA 2810001A02 gene                            | -1.58       |
| 1439268_x_at | NM_008388     | Eif3e         | eukaryotic translation initiation factor 3, subunit E | -1.58       |
| 1424921_at   | NM_198095     | Bst2          | bone marrow stromal cell antigen 2                    | -1.58       |
| 1435029_at   | NM_001164791  | B230120H23Rik | RIKEN cDNA B230120H23 gene                            | -1.58       |
| 1417516_at   | NM_007837     | Ddit3         | DNA-damage inducible transcript 3                     | -1.59       |
| 1439439_x_at | NM_023240     | Eef1d         | eukaryotic translation elongation factor 1 delta      | -1.59       |
| 1445326_at   | NM_177879     | Sdk1          | sidekick homolog 1 (chicken)                          | -1.59       |
| 1436330_x_at | XR_033816     | Gm7072        | predicted gene 7072                                   | -1.59       |
| 1439078_at   | NM_172781     | Klhl4         | kelch-like 4 (Drosophila)                             | -1.59       |
| 1425619_s_at | NM_007883     | Dsg2          | desmoglein 2                                          | -1.59       |
| 1418216_at   | NM_011820     | Ggt5          | gamma-glutamyltransferase 5                           | -1.59       |
| 1423825_at   | NM_026582     | Wls           | wntless homolog (Drosophila)                          | -1.59       |
| 1437064_at   | NM_013476     | Ar            | androgen receptor                                     | -1.59       |
| 1453771_at   | NM_028450     | Gulp1         | GULP, engulfment adaptor PTB domain                   | -1.59       |

| Probe set    | Accession No. | Symbol        | Gene Title                                        | Fold Change |
|--------------|---------------|---------------|---------------------------------------------------|-------------|
| 1452009_at   | NM_027238     | Ttc39b        | tetratricopeptide repeat domain 39B               | -1.59       |
| 1424616_s_at | NM_145583     | Pgap2         | post-GPI attachment to proteins 2                 | -1.59       |
| 1435171_at   | XM_001474539  | 2810416G20Rik | RIKEN cDNA 2810416G20 gene                        | -1.59       |
| 1426566_s_at | NM_001034029  | Il17re        | interleukin 17 receptor E                         | -1.59       |
| 1452330_a_at | NM_024263     | Mxra8         | matrix-remodelling associated 8                   | -1.59       |
| 1458406_at   | BG144063      | ---           |                                                   | -1.59       |
| 1452905_at   | NR_003633     | Meg3          | maternally expressed 3                            | -1.59       |
| 1426915_at   | NM_029653     | Dapk1         | death associated protein kinase 1                 | -1.59       |
| 1449815_a_at | NM_024186     | Ssbp2         | single-stranded DNA binding protein 2             | -1.59       |
| 1454646_at   | NM_146008     | Tcp11l2       | t-complex 11 (mouse) like 2                       | -1.59       |
| 1456365_at   | NR_033523     | Gm11517       | ubiquitin A-52 residue ribosomal protein fusion   | -1.59       |
| 1428671_at   | NM_028179     | 2200002D01Rik | RIKEN cDNA 2200002D01 gene                        | -1.59       |
| 1460634_at   | NM_001145834  | Ralgds        | ral guanine nucleotide dissociation stimulator    | -1.59       |
| 1420905_at   | NM_008359     | Il17ra        | interleukin 17 receptor A                         | -1.60       |
| 1418311_at   | NM_001038699  | Fn3k          | fructosamine 3 kinase                             | -1.60       |
| 1417814_at   | NM_001122954  | Pla2g5        | phospholipase A2, group V                         | -1.60       |
| 1448316_at   | NM_024217     | Cmtm3         | CKLF-like MARVEL transmembrane domain             | -1.60       |
| 1434917_at   | NM_172496     | Cobl          | cordon-bleu                                       | -1.60       |
| 1434410_at   | NM_174848     | Crybg3        | beta-gamma crystallin domain containing 3         | -1.60       |
| 1416686_at   | NM_001142916  | Plod2         | procollagen lysine, 2-oxoglutarate 5-dioxygenase  | -1.60       |
| 1427313_at   | NM_008967     | Ptgir         | prostaglandin I receptor (IP)                     | -1.60       |
| 1435059_at   | BM937495      | ---           |                                                   | -1.60       |
| 1441894_s_at | NM_019518     | Grasp         | GRP1 (general receptor for phosphoinositides 1)-  | -1.60       |
| 1423895_a_at | NM_001110228  | Celf2         | CUGBP, Elav-like family member 2                  | -1.60       |
| 1440888_at   | NM_001081147  | Oxtr          | oxytocin receptor                                 | -1.60       |
| 1449410_a_at | NR_002840     | Gas5          | growth arrest specific 5                          | -1.60       |
| 1449161_at   | NM_007902     | Edn2          | endothelin 2                                      | -1.60       |
| 1419442_at   | NM_016762     | Matn2         | matrilin 2                                        | -1.60       |
| 1419262_at   | NM_025862     | Acad8         | acyl-Coenzyme A dehydrogenase family, member      | -1.60       |
| 1436767_at   | NM_001170848  | Luc7l2        | LUC7-like 2 (S. cerevisiae)                       | -1.60       |
| 1450069_a_at | NM_001110228  | Celf2         | CUGBP, Elav-like family member 2                  | -1.60       |
| 1436520_at   | XM_003085583  | Ahnak2        | AHNAK nucleoprotein 2                             | -1.60       |
| 1424357_at   | NM_144936     | Tmem45b       | transmembrane protein 45b                         | -1.61       |
| 1452195_s_at | NM_030207     | Sfi1          | Sfi1 homolog, spindle assembly associated (yeast) | -1.61       |
| 1436403_at   | NM_199200     | Fam171a2      | family with sequence similarity 171, member A2    | -1.61       |
| 1417577_at   | NM_019510     | Trpc3         | transient receptor potential cation channel,      | -1.61       |
| 1441963_at   | NM_197945     | Prosapip1     | ProSAPiP1 protein                                 | -1.61       |
| 1431892_a_at | NM_152813     | Plcd3         | phospholipase C, delta 3                          | -1.61       |
| 1450063_at   | NM_019445     | Fmn2          | formin 2                                          | -1.61       |
| 1438915_at   | NR_015505     | 6720401G13Rik | RIKEN cDNA 6720401G13 gene                        | -1.61       |
| 1417168_a_at | NM_016808     | Usp2          | ubiquitin specific peptidase 2                    | -1.61       |
| 1429269_at   | NM_207203     | BC068157      | cDNA sequence BC068157                            | -1.61       |
| 1424919_at   | NM_001003817  | ErbB2         | v-erb-b2 erythroblastic leukemia viral oncogene   | -1.61       |
| 1434025_at   | BG069607      | ---           |                                                   | -1.61       |
| 1459981_s_at | NM_172684     | Rsbn1         | rosbin, round spermatid basic protein 1           | -1.61       |

| Probe set    | Accession No. | Symbol     | Gene Title                                       | Fold Change |
|--------------|---------------|------------|--------------------------------------------------|-------------|
| 1433675_at   | NR_002896     | Snhg1      | small nucleolar RNA host gene (non-protein       | -1.61       |
| 1460092_at   | BB082567      | ---        |                                                  | -1.61       |
| 1434045_at   | NM_009875     | Cdkn1b     | cyclin-dependent kinase inhibitor 1B             | -1.62       |
| 1436933_at   | BM211430      | ---        |                                                  | -1.62       |
| 1448265_x_at | NM_007962     | Mpzl2      | myelin protein zero-like 2                       | -1.62       |
| 1428074_at   | NM_001002267  | Tmem158    | transmembrane protein 158                        | -1.62       |
| 1417738_at   | NM_016899     | Rab25      | RAB25, member RAS oncogene family                | -1.62       |
| 1417644_at   | NM_010656     | Sspn       | sarcospan                                        | -1.62       |
| 1417900_a_at | NM_001161420  | Vldlr      | very low density lipoprotein receptor            | -1.62       |
| 1427343_at   | NM_029182     | Rasd2      | RASD family, member 2                            | -1.62       |
| 1427944_at   | NM_181541     | Caprin2    | caprin family member 2                           | -1.62       |
| 1443997_at   | NM_183209     | Gprin2     | G protein regulated inducer of neurite outgrowth | -1.62       |
| 1422573_at   | NM_009667     | Ampd3      | adenosine monophosphate deaminase 3              | -1.62       |
| 1437466_at   | NM_009655     | Alcam      | activated leukocyte cell adhesion molecule       | -1.62       |
| 1424041_s_at | NM_001097617  | C1s        | complement component 1, s subcomponent           | -1.62       |
| 1436413_at   | NM_001159544  | Frk        | fyn-related kinase                               | -1.62       |
| 1422747_at   | NM_016681     | Chek2      | CHK2 checkpoint homolog (S. pombe)               | -1.62       |
| 1451326_at   | NM_029631     | Abhd14b    | abhydrolase domain containing 14b                | -1.62       |
| 1452398_at   | NM_019588     | Plce1      | phospholipase C, epsilon 1                       | -1.62       |
| 1448398_s_at | NM_009079     | Rpl22      | ribosomal protein L22                            | -1.63       |
| 1449740_s_at | NM_007883     | Dsg2       | desmoglein 2                                     | -1.63       |
| 1435044_at   | NM_001110513  | Ebf4       | early B-cell factor 4                            | -1.63       |
| 1438321_x_at | NM_133858     | Fam63a     | family with sequence similarity 63, member A     | -1.63       |
| 1419350_at   | NM_001167991  | Hook2      | hook homolog 2 (Drosophila)                      | -1.63       |
| 1438183_x_at | NM_146126     | Sord       | sorbitol dehydrogenase                           | -1.63       |
| 1425484_at   | NM_145711     | Tox        | thymocyte selection-associated high mobility     | -1.63       |
| 1418990_at   | NM_025658     | Ms4a4d     | membrane-spanning 4-domains, subfamily A,        | -1.63       |
| 1427082_at   | NM_028725     | Sdr42e1    | short chain dehydrogenase/reductase family 42E,  | -1.63       |
| 1437449_at   | NM_001013381  | Rsad1      | radical S-adenosyl methionine domain containing  | -1.63       |
| 1430780_a_at | NM_013872     | Pmm1       | phosphomannomutase 1                             | -1.63       |
| 1439566_at   | NM_183183     | Gprin3     | GPRIN family member 3                            | -1.64       |
| 1422438_at   | NM_010145     | Ephx1      | epoxide hydrolase 1, microsomal                  | -1.64       |
| 1437626_at   | NM_001001806  | Zfp36l2    | zinc finger protein 36, C3H type-like 2          | -1.64       |
| 1433639_at   | NM_172543     | Fam117a    | family with sequence similarity 117, memberA     | -1.64       |
| 1428622_at   | NM_001037937  | Depdc6 /// | DEP domain containing 6 ///<br>hypothetical      | -1.64       |
| 1428431_at   | NM_001101433  | Zcchc24    | zinc finger, CCHC domain containing 24           | -1.64       |
| 1455896_a_at | NM_008430     | Kcnk1      | potassium channel, subfamily K, member 1         | -1.64       |
| 1456559_at   | NR_002863     | Emx2os     | empty spiracles homolog 2 (Drosophila) opposite  | -1.64       |
| 1423297_at   | NM_001164099  | Add3       | adducin 3 (gamma)                                | -1.64       |
| 1419261_at   | NM_025862     | Acad8      | acyl-Coenzyme A dehydrogenase family, member     | -1.64       |
| 1435138_at   | NM_173446     | Fam155a    | family with sequence similarity 155, member A    | -1.64       |
| 1437271_at   | NM_019952     | Cicf1      | cardiotrophin-like cytokine factor 1             | -1.64       |
| 1450698_at   | NM_010090     | Dusp2      | dual specificity phosphatase 2                   | -1.64       |
| 1426708_at   | NM_133738     | Antxr2     | anthrax toxin receptor 2                         | -1.64       |
| 1433557_at   | NM_144811     | Cbx7       | chromobox homolog 7                              | -1.64       |

| Probe set    | Accession No. | Symbol        | Gene Title                                        | Fold Change |
|--------------|---------------|---------------|---------------------------------------------------|-------------|
| 1449013_at   | NM_007908     | Eef2k         | eukaryotic elongation factor-2 kinase             | -1.64       |
| 1417702_a_at | NM_080462     | Hnmt          | histamine N-methyltransferase                     | -1.65       |
| 1428344_at   | NM_028922     | Ppapdc2       | phosphatidic acid phosphatase type 2 domain       | -1.65       |
| 1418829_a_at | NM_013509     | Eno2          | enolase 2, gamma neuronal                         | -1.65       |
| 1455096_at   | NM_201518     | Flrt2         | fibronectin leucine rich transmembrane protein 2  | -1.65       |
| 1417812_a_at | NM_008484     | Lamb3         | laminin, beta 3                                   | -1.65       |
| 1448901_at   | NM_019696     | Cpxm1         | carboxypeptidase X 1 (M14 family)                 | -1.65       |
| 1418924_at   | NM_025886     | Rassf7        | Ras association (RalGDS/AF-6) domain family (N-   | -1.65       |
| 1440147_at   | NM_144945     | Lgi2          | leucine-rich repeat LGI family, member 2          | -1.65       |
| 1418486_at   | NM_011704     | Vnn1          | vanin 1                                           | -1.65       |
| 1429390_at   | NM_153420     | Acpl2         | acid phosphatase-like 2                           | -1.65       |
| 1452151_at   | NM_172611     | Gramd4        | GRAM domain containing 4                          | -1.65       |
| 1417492_at   | NM_007798     | Ctsb          | cathepsin B                                       | -1.65       |
| 1421350_a_at | NM_028736     | Grip1         | glutamate receptor interacting protein 1          | -1.65       |
| 1429727_at   | NM_025807     | Slc16a9       | solute carrier family 16 (monocarboxylic acid     | -1.65       |
| 1423602_at   | NM_009421     | Traf1         | TNF receptor-associated factor 1                  | -1.65       |
| 1455250_at   | NM_133816     | Sh3bp4        | SH3-domain binding protein 4                      | -1.65       |
| 1438061_at   | NM_001162896  | 4930523C07Rik | RIKEN cDNA 4930523C07 gene                        | -1.65       |
| 1424351_at   | NM_026323     | Wfdc2         | WAP four-disulfide core domain 2                  | -1.65       |
| 1449484_at   | NM_011491     | Stc2          | stanniocalcin 2                                   | -1.65       |
| 1438861_at   | NM_172870     | Bnc2          | basonuclin 2                                      | -1.65       |
| 1424450_at   | NM_001110337  | Gprc5c        | G protein-coupled receptor, family C, group 5,    | -1.66       |
| 1419056_at   | NM_001025364  | Rtn2          | reticulon 2 (Z-band associated protein)           | -1.66       |
| 1423284_at   | NM_026345     | Mansc1        | MANSC domain containing 1                         | -1.66       |
| 1429588_at   | NM_026054     | 2810474O19Rik | RIKEN cDNA 2810474O19 gene                        | -1.66       |
| 1437594_x_at | NM_133779     | Pigt          | phosphatidylinositol glycan anchor biosynthesis,  | -1.66       |
| 1451348_at   | NM_001037937  | Depdc6        | DEP domain containing 6                           | -1.66       |
| 1457675_at   | NM_001033164  | 2510002D24Rik | RIKEN cDNA 2510002D24 gene                        | -1.66       |
| 1460386_a_at | NM_009199     | Slc1a1        | solute carrier family 1 (neuronal/epithelial high | -1.66       |
| 1420191_s_at | NM_177473     | Tmem191c      | transmembrane protein 191C                        | -1.66       |
| 1454824_s_at | NM_001005863  | Mtus1         | mitochondrial tumor suppressor 1                  | -1.66       |
| 1450971_at   | NM_008655     | Gadd45b       | growth arrest and DNA-damage-inducible 45         | -1.66       |
| 1421852_at   | NM_021542     | Kcnk5         | potassium channel, subfamily K, member 5          | -1.66       |
| 1419905_s_at | NM_008278     | Hpgd          | hydroxyprostaglandin dehydrogenase 15 (NAD)       | -1.66       |
| 1437744_at   | NM_178740     | Slitrk4       | SLIT and NTRK-like family, member 4               | -1.67       |
| 1423493_a_at | NM_001081981  | Nfix          | nuclear factor I/X                                | -1.67       |
| 1417848_at   | NM_133218     | Zfp704        | zinc finger protein 704                           | -1.67       |
| 1417027_at   | NM_030706     | Trim2         | tripartite motif-containing 2                     | -1.67       |
| 1420664_s_at | NM_011171     | Procr         | protein C receptor, endothelial                   | -1.67       |
| 1438667_at   | NM_001032727  | Sybu          | syntabulin (syntaxin-interacting)                 | -1.67       |
| 1420678_a_at | NM_019583     | Il17rb        | interleukin 17 receptor B                         | -1.67       |
| 1425396_a_at | NM_001162432  | Lck           | lymphocyte protein tyrosine kinase                | -1.67       |
| 1421172_at   | NM_007400     | Adam12        | a disintegrin and metallopeptidase domain 12      | -1.67       |
| 1435657_at   | NM_175367     | Ston2         | stonin 2                                          | -1.68       |
| 1436591_at   | NM_001033311  | Vsig10        | V-set and immunoglobulin domain containing 10     | -1.68       |

| Probe set    | Accession No. | Symbol                                | Gene Title                                                             | Fold Change |
|--------------|---------------|---------------------------------------|------------------------------------------------------------------------|-------------|
| 1437661_at   | NM_001033220  | AU021092                              | expressed sequence AU021092                                            | -1.68       |
| 1425514_at   | NM_001024955  | Pik3r1                                | phosphatidylinositol 3-kinase, regulatory subunit,                     | -1.68       |
| 1423718_at   | NM_021299     | Ak3                                   | adenylate kinase 3                                                     | -1.68       |
| 1426383_at   | NM_001113333  | Cry2                                  | cryptochrome 2 (photolyase-like)                                       | -1.68       |
| 1424615_at   | NM_145583     | Pgap2                                 | post-GPI attachment to proteins 2                                      | -1.68       |
| 1418406_at   | NM_008803     | Pde8a                                 | phosphodiesterase 8A                                                   | -1.68       |
| 1426379_at   | NM_145625     | Eif4b                                 | eukaryotic translation initiation factor 4B                            | -1.68       |
| 1431109_at   | NM_001081224  | Prr16                                 | proline rich 16                                                        | -1.68       |
| 1455908_a_at | NM_029023     | Scpep1                                | serine carboxypeptidase 1                                              | -1.68       |
| 1423131_at   | NM_021552     | Nsa2                                  | NSA2 ribosome biogenesis homolog (S.                                   | -1.68       |
| 1457964_at   | XR_105000     | 1810044D09Rik                         | RIKEN cDNA 1810044D09 gene                                             | -1.68       |
| 1425715_at   | NM_027163     | Il1f8                                 | interleukin 1 family, member 8                                         | -1.68       |
| 1437442_at   | NM_001122758  | Pcdh7                                 | Protocadherin 7                                                        | -1.68       |
| 1419075_s_at | NM_009117     | Saa1                                  | serum amyloid A 1                                                      | -1.68       |
| 1459749_s_at | NM_183221     | Fat4                                  | FAT tumor suppressor homolog 4 (Drosophila)                            | -1.68       |
| 1417883_at   | NM_010361     | Gstt2                                 | glutathione S-transferase, theta 2                                     | -1.68       |
| 1434489_at   | NM_172760     | Elmo3                                 | engulfment and cell motility 3, ced-12 homolog                         | -1.68       |
| 1426937_at   | NM_027519     | 6330406i15Rik                         | RIKEN cDNA 6330406i15 gene                                             | -1.69       |
| 1449475_at   | NM_138652     | Atp12a                                | ATPase, H <sup>+</sup> /K <sup>+</sup> transporting, nongastric, alpha | -1.69       |
| 1448724_at   | NM_009895     | Cish                                  | cytokine inducible SH2-containing protein                              | -1.69       |
| 1429796_at   | NM_001164268  | Kalrn                                 | kalirin, RhoGEF kinase                                                 | -1.69       |
| 1436101_at   | NM_178607     | Rnf24                                 | ring finger protein 24                                                 | -1.69       |
| 1418581_a_at | NM_001034030  | Limk2                                 | LIM motif-containing protein kinase 2                                  | -1.69       |
| 1426606_at   | NM_145123     | Crtac1                                | cartilage acidic protein 1                                             | -1.69       |
| 1427149_at   | NM_001160268  | Plekha6                               | pleckstrin homology domain containing, family A                        | -1.69       |
| 1456984_at   | NM_133194     | Scml2                                 | sex comb on midleg-like 2 (Drosophila)                                 | -1.69       |
| 1423679_at   | NM_025944     | 2810432L12Rik                         | RIKEN cDNA 2810432L12 gene                                             | -1.69       |
| 1455426_at   | NM_010140     | Epha3                                 | Eph receptor A3                                                        | -1.69       |
| 1448471_a_at | NM_001145799  | Ctla2a                                | cytotoxic T lymphocyte-associated protein 2                            | -1.69       |
| 1419475_a_at | NM_007914     | Ehf                                   | ets homologous factor                                                  | -1.70       |
| 1439428_x_at | NM_146041     | Gmms                                  | GDP-mannose 4, 6-dehydratase                                           | -1.70       |
| 1421604_a_at | NM_008453     | Klf3                                  | Kruppel-like factor 3 (basic)                                          | -1.70       |
| 1451574_at   | NM_029933     | Bcl9                                  | B-cell CLL/lymphoma 9                                                  | -1.70       |
| 1447583_x_at | NM_029771     | Gpr30                                 | G protein-coupled receptor 30                                          | -1.70       |
| 1448227_at   | NM_010346     | Grb7                                  | growth factor receptor bound protein 7                                 | -1.70       |
| 1427982_s_at | NM_001005510  | Syne2                                 | synaptic nuclear envelope 2                                            | -1.70       |
| 1426784_at   | NM_172570     | Trim47                                | tripartite motif-containing 47                                         | -1.70       |
| 1439571_at   | BB820889      | E230008J23Rik                         | RIKEN cDNA E230008J23 gene                                             | -1.70       |
| 1452678_a_at | NM_172404     | Ccbl1                                 | cysteine conjugate-beta lyase 1                                        | -1.70       |
| 1426642_at   | NM_010233     | <td>fibronectin 1</td> <td>-1.70</td> | fibronectin 1                                                          | -1.70       |
| 1460453_at   | NM_145968     | Tagap ///                             | T-cell activation Rho GTPase-activating protein                        | -1.71       |
| 1449403_at   | NM_001163748  | Pde9a                                 | phosphodiesterase 9A                                                   | -1.71       |
| 1455144_s_at | NM_001099288  | AU040829                              | expressed sequence AU040829                                            | -1.71       |
| 1437173_at   | NM_010101     | S1pr3                                 | sphingosine-1-phosphate receptor 3                                     | -1.71       |
| 1418172_at   | NM_013546     | Hebp1                                 | heme binding protein 1                                                 | -1.71       |

| Probe set    | Accession No. | Symbol        | Gene Title                                         | Fold Change |
|--------------|---------------|---------------|----------------------------------------------------|-------------|
| 1418086_at   | NM_026731     | Ppp1r14a      | protein phosphatase 1, regulatory (inhibitor)      | -1.71       |
| 1441197_at   | NR_015610     | 9530059O14Rik | RIKEN cDNA 9530059O14 gene                         | -1.71       |
| 1423824_at   | NM_026582     | Wls           | wntless homolog (Drosophila)                       | -1.71       |
| 1460732_a_at | NM_008909     | Ppl           | periplakin                                         | -1.71       |
| 1448530_at   | NM_025508     | Gmpr          | guanosine monophosphate reductase                  | -1.71       |
| 1416996_at   | NM_018775     | Tbc1d8        | TBC1 domain family, member 8                       | -1.71       |
| 1418320_at   | NM_133351     | Prss8         | protease, serine, 8 (prostasin)                    | -1.71       |
| 1453498_x_at | NM_001085409  | Steap3        | STEAP family member 3                              | -1.71       |
| 1429146_at   | NM_001160345  | Svip          | small VCP/p97-interacting protein                  | -1.71       |
| 1454788_at   | NM_177305     | Arl4c         | ADP-ribosylation factor-like 4C                    | -1.71       |
| 1441065_at   | NM_009167     | Shc3          | Src homology 2 domain-containing transforming      | -1.71       |
| 1418105_at   | NM_019675     | Stmn4         | stathmin-like 4                                    | -1.71       |
| 1440454_at   | NM_175437     | Pion          | pigeon homolog (Drosophila)                        | -1.71       |
| 1443998_at   | NM_175445     | Rassf2        | Ras association (RalGDS/AF-6) domain family        | -1.71       |
| 1449510_at   | NM_001085415  | Zfp467        | zinc finger protein 467                            | -1.71       |
| 1437784_at   | NM_001111026  | Runx1t1       | runt-related transcription factor 1; translocated  | -1.71       |
| 1427298_at   | NR_002870     | Dnm3os        | dynamamin 3, opposite strand                       | -1.72       |
| 1424067_at   | NM_010493     | Icam1         | intercellular adhesion molecule 1                  | -1.72       |
| 1450931_at   | NM_001081039  | Dock9         | dedicator of cytokinesis 9                         | -1.72       |
| 1438054_x_at | NM_172994     | Ppp2r2c       | protein phosphatase 2 (formerly 2A), regulatory    | -1.72       |
| 1419066_at   | NM_030244     | Ier5l         | immediate early response 5-like                    | -1.72       |
| 1451154_a_at | NM_001110228  | Celf2         | CUGBP, Elav-like family member 2                   | -1.72       |
| 1427482_a_at | NM_007592     | Car8          | carbonic anhydrase 8                               | -1.72       |
| 1456392_at   | NM_001039094  | Negr1         | neuronal growth regulator 1                        | -1.72       |
| 1441081_a_at | NR_015536     | 1110038B12Rik | RIKEN cDNA 1110038B12 gene                         | -1.72       |
| 1419836_at   | AU040583      | ---           |                                                    | -1.72       |
| 1422818_at   | NM_001111324  | Nedd9         | neural precursor cell expressed, developmentally   | -1.72       |
| 1417155_at   | NM_008709     | Mycn          | v-myc myelocytomatosis viral related oncogene,     | -1.72       |
| 1425543_s_at | NM_144920     | Plekha5       | pleckstrin homology domain containing, family A    | -1.72       |
| 1460365_a_at | NM_010065     | Dnm1          | dynamamin 1                                        | -1.72       |
| 1420904_at   | NM_008359     | Il17ra        | interleukin 17 receptor A                          | -1.72       |
| 1442024_at   | NM_001167908  | Ppp1r3e       | Protein phosphatase 1, regulatory (inhibitor)      | -1.72       |
| 1433725_at   | NM_007395     | Acvr1b        | activin A receptor, type 1B                        | -1.73       |
| 1422640_at   | NM_053134     | Pcdhb9        | protocadherin beta 9                               | -1.73       |
| 1455337_at   | NM_139232     | Fgd4          | FYVE, RhoGEF and PH domain containing 4            | -1.73       |
| 1435084_at   | BB200607      | C730049O14Rik | RIKEN cDNA C730049O14 gene                         | -1.73       |
| 1430886_at   | NM_028275     | 1700112E06Rik | RIKEN cDNA 1700112E06 gene                         | -1.73       |
| 1420349_at   | NM_008966     | Ptgfr         | prostaglandin F receptor                           | -1.73       |
| 1422476_at   | NM_023065     | Ifi30         | interferon gamma inducible protein 30              | -1.73       |
| 1425104_at   | NM_001142731  | Kctd1         | potassium channel tetramerisation domain           | -1.73       |
| 1417481_at   | NM_001168392  | Ramp1         | receptor (calcitonin) activity modifying protein 1 | -1.73       |
| 1418301_at   | NM_016851     | Irf6          | interferon regulatory factor 6                     | -1.73       |
| 1448169_at   | NM_010664     | Krt18         | keratin 18                                         | -1.74       |
| 1424833_at   | NM_010586     | Itpr2         | inositol 1,4,5-triphosphate receptor 2             | -1.74       |
| 1439537_at   | BG071024      | ---           |                                                    | -1.74       |



| Probe set    | Accession No. | Symbol        | Gene Title                                                    | Fold Change |
|--------------|---------------|---------------|---------------------------------------------------------------|-------------|
| 1452308_a_at | NM_178405     | Atp1a2        | ATPase, Na <sup>+</sup> /K <sup>+</sup> transporting, alpha 2 | -1.74       |
| 1443260_at   | NM_001193271  | Meis1         | Meis homeobox 1                                               | -1.74       |
| 1421066_at   | NM_001048177  | Jak2          | Janus kinase 2                                                | -1.74       |
| 1437829_s_at | NM_007908     | Eef2k         | eukaryotic elongation factor-2 kinase                         | -1.74       |
| 1430211_at   | XM_128114     | 4930415O20Rik | RIKEN cDNA 4930415O20 gene                                    | -1.74       |
| 1431805_a_at | NM_027897     | Rhpn2         | rhophilin, Rho GTPase binding protein 2                       | -1.74       |
| 1440527_at   | BI440542      | ---           |                                                               | -1.74       |
| 1424167_a_at | NM_013872     | Pmm1          | phosphomannomutase 1                                          | -1.75       |
| 1427042_at   | NM_178920     | Mal2          | mal, T-cell differentiation protein 2                         | -1.75       |
| 1438972_x_at | NR_030682     | 2810410L24Rik | RIKEN cDNA 2810410L24 gene                                    | -1.75       |
| 1432591_at   | NM_021362     | Pappa         | pregnancy-associated plasma protein A                         | -1.75       |
| 1435695_a_at | NM_026637     | Ggct          | gamma-glutamyl cyclotransferase                               | -1.75       |
| 1448785_at   | NM_001111026  | Runx1t1       | runt-related transcription factor 1; translocated             | -1.75       |
| 1438662_at   | NM_001099299  | Ajap1         | adherens junction associated protein 1                        | -1.75       |
| 1437089_at   | NM_029011     | Pyroxd2       | pyridine nucleotide-disulphide oxidoreductase                 | -1.75       |
| 1425016_at   | NM_010142     | Ephb2         | Eph receptor B2                                               | -1.75       |
| 1448656_at   | NM_001044741  | Cacnb3        | calcium channel, voltage-dependent, beta 3                    | -1.75       |
| 1449271_a_at | NM_019487     | Hebp2         | heme binding protein 2                                        | -1.75       |
| 1451363_a_at | NM_001093754  | Dennd2d       | DENN/MADD domain containing 2D                                | -1.76       |
| 1449248_at   | NM_009900     | Clcn2         | chloride channel 2                                            | -1.76       |
| 1417483_at   | NM_001159394  | Nfkbiz        | nuclear factor of kappa light polypeptide gene                | -1.76       |
| 1451848_a_at | NM_009968     | Cryz          | crystallin, zeta                                              | -1.76       |
| 1451323_at   | NM_145916     | Zfp7          | zinc finger protein 7                                         | -1.76       |
| 1426865_a_at | NM_001081445  | Ncam1         | neural cell adhesion molecule 1                               | -1.76       |
| 1451047_at   | NM_008409     | Itn2a         | integral membrane protein 2A                                  | -1.76       |
| 1452703_at   | NM_001171000  | Ahcy12        | S-adenosylhomocysteine hydrolase-like 2                       | -1.76       |
| 1451375_at   | NM_007914     | Ehf           | ets homologous factor                                         | -1.76       |
| 1455418_at   | BM119433      | ---           |                                                               | -1.76       |
| 1453344_at   | NR_027819     | 1810032O08Rik | RIKEN cDNA 1810032O08 gene                                    | -1.76       |
| 1450177_at   | NM_033217     | Ngfr          | nerve growth factor receptor (TNFR superfamily,               | -1.76       |
| 1422335_at   | NM_007418     | Adra2c        | adrenergic receptor, alpha 2c                                 | -1.77       |
| 1418672_at   | NM_013778     | Akr1c13       | aldo-keto reductase family 1, member C13                      | -1.77       |
| 1444632_at   | NR_015455     | BC064078      | cDNA sequence BC064078                                        | -1.77       |
| 1443579_s_at | NM_001037937  | Depdc6 ///    | DEP domain containing 6 /// hypothetical                      | -1.77       |
| 1438241_at   | NM_177740     | Rgma          | RGM domain family, member A                                   | -1.77       |
| 1435933_at   | NM_001099298  | Scn2a1        | sodium channel, voltage-gated, type II, alpha 1               | -1.77       |
| 1439909_at   | NM_145492     | Zfp521        | zinc finger protein 521                                       | -1.77       |
| 1431829_a_at | NM_023622     | Rgl3          | ral guanine nucleotide dissociation stimulator-like           | -1.77       |
| 1437132_x_at | NM_001111324  | Nedd9         | neural precursor cell expressed, developmentally              | -1.77       |
| 1428915_at   | NM_178848     | Sirt5         | sirtuin 5 (silent mating type information                     | -1.77       |
| 1438325_at   | NM_007963     | Mecom         | MDS1 and EVI1 complex locus                                   | -1.77       |
| 1447693_s_at | NM_001042752  | Neo1          | neogenin                                                      | -1.77       |
| 1424834_s_at | NM_010586     | Itpr2         | inositol 1,4,5-triphosphate receptor 2                        | -1.77       |
| 1426626_at   | NM_026816     | Gtf2f2        | general transcription factor IIF, polypeptide 2               | -1.77       |
| 1451446_at   | NM_054041     | Antxr1        | anthrax toxin receptor 1                                      | -1.77       |

| Probe set    | Accession No. | Symbol        | Gene Title                                                        | Fold Change |
|--------------|---------------|---------------|-------------------------------------------------------------------|-------------|
| 1439852_at   | BB036443      | ---           |                                                                   | -1.77       |
| 1437392_at   | NM_001085521  | Tmem90b       | transmembrane protein 90B                                         | -1.78       |
| 1434007_at   | NM_001166633  | Gylt1b        | glycosyltransferase-like 1B                                       | -1.78       |
| 1427386_at   | NM_001112744  | Arhgef16      | Rho guanine nucleotide exchange factor (GEF) 16                   | -1.78       |
| 1421078_at   | NM_053085     | Tcf23         | transcription factor 23                                           | -1.78       |
| 1428394_at   | NM_172267     | Phyhd1        | phytanoyl-CoA dioxygenase domain containing 1                     | -1.78       |
| 1454752_at   | NM_001081425  | Rbm24         | RNA binding motif protein 24                                      | -1.78       |
| 1449019_at   | NM_001042541  | Akap1         | A kinase (PRKA) anchor protein 1                                  | -1.78       |
| 1420838_at   | NM_001025074  | Ntrk2         | neurotrophic tyrosine kinase, receptor, type 2                    | -1.78       |
| 1416958_at   | NM_011584     | Nr1d2         | nuclear receptor subfamily 1, group D, member 2                   | -1.78       |
| 1429022_at   | NM_001025372  | Adcyap1r1     | adenylate cyclase activating polypeptide 1                        | -1.78       |
| 1450992_a_at | NM_001193271  | Meis1         | Meis homeobox 1                                                   | -1.78       |
| 1448861_at   | NM_011633     | Traf5         | TNF receptor-associated factor 5                                  | -1.79       |
| 1436040_at   | NR_029468     | Snhg12        | small nucleolar RNA host gene 12                                  | -1.79       |
| 1421424_a_at | NM_008486     | Anpep         | alanyl (membrane) aminopeptidase                                  | -1.79       |
| 1441506_at   | NM_001190451  | Dcn           | decorin                                                           | -1.79       |
| 1435115_at   | NM_027402     | Fndc5         | fibronectin type III domain containing 5                          | -1.79       |
| 1455374_at   | NM_008426     | Kcnj3         | potassium inwardly-rectifying channel, subfamily                  | -1.79       |
| 1455607_at   | NM_028351     | Rspo3         | R-spondin 3 homolog (Xenopus laevis)                              | -1.79       |
| 1434158_at   | NM_146041     | Gmds          | GDP-mannose 4, 6-dehydratase                                      | -1.79       |
| 1437302_at   | NM_007420     | Adrb2         | adrenergic receptor, beta 2                                       | -1.79       |
| 1443964_at   | NM_146260     | Tmie          | transmembrane inner ear                                           | -1.79       |
| 1422567_at   | NM_022018     | Fam129a       | family with sequence similarity 129, member A                     | -1.79       |
| 1449553_at   | NM_025998     | Nkain1        | Na <sup>+</sup> /K <sup>+</sup> transporting ATPase interacting 1 | -1.79       |
| 1448765_at   | NM_001122892  | Fyn           | Fyn proto-oncogene                                                | -1.79       |
| 1439476_at   | NM_007883     | Dsg2          | desmoglein 2                                                      | -1.79       |
| 1450350_a_at | NM_030887     | Jdp2          | Jun dimerization protein 2                                        | -1.79       |
| 1452244_at   | NM_027519     | 6330406115Rik | RIKEN cDNA 6330406115 gene                                        | -1.80       |
| 1416236_a_at | NM_007962     | Mpzl2         | myelin protein zero-like 2                                        | -1.80       |
| 1455260_at   | NM_001163073  | Lcorl         | ligand dependent nuclear receptor corepressor-                    | -1.80       |
| 1438745_at   | NR_027829     | Gm10638       | predicted gene 10638                                              | -1.80       |
| 1429029_at   | NM_028943     | Sgms2         | sphingomyelin synthase 2                                          | -1.80       |
| 1417896_at   | NM_013769     | Tjp3          | tight junction protein 3                                          | -1.80       |
| 1424175_at   | NM_017376     | Tef           | thyrotroph embryonic factor                                       | -1.80       |
| 1427182_s_at | NM_172631     | D18Ert653e    | DNA segment, Chr 18, ERATO Doi 653, expressed                     | -1.80       |
| 1438877_at   | NM_153417     | Trpm6         | transient receptor potential cation channel,                      | -1.80       |
| 1429274_at   | NM_027990     | Lypd6b        | LY6/PLAUR domain containing 6B                                    | -1.80       |
| 1439406_x_at | NM_001039189  | Fars2         | phenylalanine-tRNA synthetase 2 (mitochondrial)                   | -1.80       |
| 1418788_at   | NM_013690     | Tek           | endothelial-specific receptor tyrosine kinase                     | -1.80       |
| 1435951_at   | NM_028736     | Grip1         | glutamate receptor interacting protein 1                          | -1.81       |
| 1422018_at   | NM_010437     | Hivep2        | human immunodeficiency virus type I enhancer                      | -1.81       |
| 1444615_x_at | NM_001111026  | Runx1t1       | runt-related transcription factor 1; translocated                 | -1.81       |
| 1419201_at   | NM_001177373  | Klk11         | kallikrein related-peptidase 11                                   | -1.81       |
| 1425108_a_at | NM_001033872  | Smagp         | small cell adhesion glycoprotein                                  | -1.81       |
| 1422721_at   | NM_031880     | Tnk1          | tyrosine kinase, non-receptor, 1                                  | -1.81       |

| Probe set    | Accession No. | Symbol           | Gene Title                                           | Fold Change |
|--------------|---------------|------------------|------------------------------------------------------|-------------|
| 1435603_at   | NM_172463     | Sned1            | sushi, nidogen and EGF-like domains 1                | -1.81       |
| 1419276_at   | NM_008813     | Enpp1            | ectonucleotide                                       | -1.81       |
| 1420512_at   | NM_020265     | Dkk2             | dickkopf homolog 2 ( <i>Xenopus laevis</i> )         | -1.81       |
| 1439098_at   | XR_105187     | E230013L22Rik    | RIKEN cDNA E230013L22 gene                           | -1.81       |
| 1421937_at   | NM_011932     | Dapp1            | dual adaptor for phosphotyrosine and 3-              | -1.81       |
| 1428809_at   | NM_001163473  | 1810010H24Rik    | RIKEN cDNA 1810010H24 gene                           | -1.81       |
| 1460574_at   | NM_183221     | Fat4             | FAT tumor suppressor homolog 4 ( <i>Drosophila</i> ) | -1.81       |
| 1446591_at   | NM_001005422  | Gm1574           | predicted gene 1574                                  | -1.82       |
| 1456133_x_at | NM_001145884  | Itgb5            | integrin beta 5                                      | -1.82       |
| 1460178_at   | NM_001168591  | Lonp2            | lon peptidase 2, peroxisomal                         | -1.82       |
| 1426818_at   | NM_001042592  | Arrdc4           | arrestin domain containing 4                         | -1.82       |
| 1453141_at   | XR_106377     | 0610009L18Rik    | RIKEN cDNA 0610009L18 gene                           | -1.82       |
| 1424245_at   | NM_145603     | Ces2c /// Ces2d- | carboxylesterase 2C /// carboxylesterase 2D,         | -1.82       |
| 1416302_at   | NM_007897     | Ebf1             | early B-cell factor 1                                | -1.82       |
| 1422632_at   | NM_009985     | Ctsw             | cathepsin W                                          | -1.82       |
| 1416072_at   | NM_001111059  | Cd34             | CD34 antigen                                         | -1.82       |
| 1459546_s_at | NM_008813     | Enpp1            | ectonucleotide                                       | -1.82       |
| 1454617_at   | NM_001042591  | Arrdc3           | arrestin domain containing 3                         | -1.82       |
| 1451502_at   | NM_011987     | Pla2g10          | phospholipase A2, group X                            | -1.83       |
| 1423954_at   | NM_009778     | C3               | complement component 3                               | -1.83       |
| 1448110_at   | NM_001163489  | Sema4a           | sema domain, immunoglobulin domain (Ig),             | -1.83       |
| 1429206_at   | NM_001081347  | Rhobtb1          | Rho-related BTB domain containing 1                  | -1.83       |
| 1455565_at   | NM_029933     | Bcl9             | B-cell CLL/lymphoma 9                                | -1.83       |
| 1434628_a_at | NM_027897     | Rhpn2            | rhopilin, Rho GTPase binding protein 2               | -1.83       |
| 1416401_at   | NM_001136055  | Cd82             | CD82 antigen                                         | -1.84       |
| 1418472_at   | NM_023113     | Aspa             | aspartoacylase                                       | -1.84       |
| 1456233_at   | BB080923      | ---              |                                                      | -1.84       |
| 1421129_a_at | NM_001163336  | Atp2a3           | ATPase, Ca <sup>++</sup> transporting, ubiquitous    | -1.84       |
| 1419427_at   | NM_009971     | Csf3             | colony stimulating factor 3 (granulocyte)            | -1.84       |
| 1416101_a_at | NM_015786     | Hist1h1c         | histone cluster 1, H1c                               | -1.84       |
| 1440879_at   | NM_147220     | Abca9            | ATP-binding cassette, sub-family A (ABC1),           | -1.84       |
| 1455604_at   | NM_001042659  | Fzd5             | frizzled homolog 5 ( <i>Drosophila</i> )             | -1.84       |
| 1456397_at   | NM_009867     | Cdh4             | cadherin 4                                           | -1.85       |
| 1455963_at   | NM_177013     | Tmem229a         | transmembrane protein 229A                           | -1.85       |
| 1416916_at   | NM_001163131  | Elf3             | E74-like factor 3                                    | -1.85       |
| 1455799_at   | NM_001043354  | Rorb             | RAR-related orphan receptor beta                     | -1.85       |
| 1455010_at   | NM_001081005  | 1500012F01Rik    | RIKEN cDNA 1500012F01 gene                           | -1.86       |
| 1433687_at   | NM_001166474  | Vmac             | vimentin-type intermediate filament associated       | -1.86       |
| 1418374_at   | NM_008557     | Fxyd3            | FXVD domain-containing ion transport regulator       | -1.86       |
| 1426864_a_at | NM_001081445  | Ncam1            | neural cell adhesion molecule 1                      | -1.87       |
| 1449062_at   | NM_008439     | Khk              | ketohexokinase                                       | -1.87       |
| 1416029_at   | NM_013692     | Klf10            | Kruppel-like factor 10                               | -1.87       |
| 1434572_at   | NM_024124     | Hdac9            | histone deacetylase 9                                | -1.87       |
| 1449773_s_at | NM_008655     | Gadd45b          | growth arrest and DNA-damage-inducible 45            | -1.87       |
| 1417590_at   | NM_024264     | Cyp27a1          | cytochrome P450, family 27, subfamily a,             | -1.87       |

| Probe set    | Accession No. | Symbol          | Gene Title                                            | Fold Change |
|--------------|---------------|-----------------|-------------------------------------------------------|-------------|
| 1439087_a_at | NM_178149     | Pik3ip1         | phosphoinositide-3-kinase interacting protein 1       | -1.87       |
| 1416473_a_at | NM_020043     | Igdcc4          | immunoglobulin superfamily, DCC subclass,             | -1.87       |
| 1460459_at   | NM_028748     | Paqr5           | progesterin and adipoQ receptor family member V       | -1.87       |
| 1417558_at   | NM_001122892  | Fyn             | Fyn proto-oncogene                                    | -1.87       |
| 1454733_at   | NM_001171007  | Nod1            | nucleotide-binding oligomerization domain             | -1.88       |
| 1418400_at   | NM_026235     | Larp6           | La ribonucleoprotein domain family, member 6          | -1.88       |
| 1437900_at   | NM_001162896  | 4930523C07Rik   | RIKEN cDNA 4930523C07 gene                            | -1.88       |
| 1428066_at   | NM_207202     | Ccdc120         | coiled-coil domain containing 120                     | -1.88       |
| 1416713_at   | NM_026481     | Tppp3           | tubulin polymerization-promoting protein family       | -1.88       |
| 1438934_x_at | NM_001163489  | Sema4a          | sema domain, immunoglobulin domain (Ig),              | -1.88       |
| 1424647_at   | NM_146017     | Gabrp           | gamma-aminobutyric acid (GABA) A receptor, pi         | -1.88       |
| 1438724_at   | NM_001163645  | Osbp13          | oxysterol binding protein-like 3                      | -1.88       |
| 1456735_x_at | NM_153420     | Acpl2           | acid phosphatase-like 2                               | -1.88       |
| 1424127_at   | NM_010165     | Eya2            | eyes absent 2 homolog (Drosophila)                    | -1.89       |
| 1418780_at   | NM_018887     | Cyp39a1         | cytochrome P450, family 39, subfamily a,              | -1.89       |
| 1423608_at   | NM_008409     | Itn2a           | integral membrane protein 2A                          | -1.89       |
| 1417533_a_at | NM_001145884  | Itgb5           | integrin beta 5                                       | -1.89       |
| 1439827_at   | NM_175501     | Adamts12        | a disintegrin-like and metalloproteinase (reprolysin) | -1.89       |
| 1452861_at   | NM_028096     | 2010300C02Rik   | RIKEN cDNA 2010300C02 gene                            | -1.89       |
| 1425841_at   | NM_145947     | Slc26a7         | solute carrier family 26, member 7                    | -1.89       |
| 1438411_at   | NM_175520     | Gpr81           | G protein-coupled receptor 81                         | -1.89       |
| 1422734_a_at | NM_010848     | Myb             | myeloblastosis oncogene                               | -1.90       |
| 1417534_at   | NM_001145884  | Itgb5           | integrin beta 5                                       | -1.90       |
| 1435196_at   | NM_001025074  | Ntrk2           | neurotrophic tyrosine kinase, receptor, type 2        | -1.90       |
| 1439764_s_at | NM_183029     | Igf2bp2         | insulin-like growth factor 2 mRNA binding             | -1.91       |
| 1428988_at   | NM_029600     | Abcc3           | ATP-binding cassette, sub-family C (CFTR/MRP),        | -1.91       |
| 1435069_at   | NR_015455     | BC064078        | cDNA sequence BC064078                                | -1.91       |
| 1417050_at   | NM_026161     | C1qtnf4         | C1q and tumor necrosis factor related protein 4       | -1.92       |
| 1416892_s_at | NM_025626     | Fam107b         | family with sequence similarity 107, member B         | -1.92       |
| 1436275_at   | NM_030716     | Kcnp2           | Kv channel-interacting protein 2                      | -1.92       |
| 1449098_a_at | NM_001136090  | Poli            | polymerase (DNA directed), iota                       | -1.92       |
| 1425248_a_at | NM_019392     | Tyro3           | TYRO3 protein tyrosine kinase 3                       | -1.92       |
| 1425436_x_at | NM_010648     | Klra3 /// Klra9 | killer cell lectin-like receptor, subfamily A,        | -1.92       |
| 1460185_at   | NM_016879     | Krt85           | keratin 85                                            | -1.92       |
| 1440973_at   | NM_012028     | LOC552874 ///   | hypothetical LOC552874 /// ST6 (alpha-N-acetyl-       | -1.93       |
| 1428064_at   | NM_001040111  | Arap1           | ArfGAP with RhoGAP domain, ankyrin repeat and         | -1.93       |
| 1448293_at   | NM_007897     | Ebf1            | early B-cell factor 1                                 | -1.93       |
| 1452893_s_at | NM_027147     | Enho            | energy homeostasis associated                         | -1.93       |
| 1418511_at   | NM_019759     | Dpt             | dermatopontin                                         | -1.93       |
| 1451033_a_at | NM_016984     | Trpc4           | transient receptor potential cation channel,          | -1.93       |
| 1437494_at   | NM_178907     | Mapkapk3        | mitogen-activated protein kinase-activated            | -1.93       |
| 1436665_a_at | NM_001113549  | Ltbp4           | latent transforming growth factor beta binding        | -1.93       |
| 1442187_at   | NM_009747     | Bdkrb2          | Bradykinin receptor, beta 2                           | -1.94       |
| 1437434_a_at | NM_026582     | Wls             | wntless homolog (Drosophila)                          | -1.94       |
| 1428392_at   | NM_175445     | Rassf2          | Ras association (RalGDS/AF-6) domain family           | -1.94       |

| Probe set    | Accession No. | Symbol          | Gene Title                                        | Fold Change |
|--------------|---------------|-----------------|---------------------------------------------------|-------------|
| 1435687_at   | NM_001109753  | Sv2b            | synaptic vesicle glycoprotein 2 b                 | -1.95       |
| 1429891_at   | NM_029341     | Capsl           | calcyphosine-like                                 | -1.95       |
| 1439887_at   | NM_001160368  | Rnf152          | ring finger protein 152                           | -1.95       |
| 1427508_at   | NM_001038499  | Arsi            | arylsulfatase i                                   | -1.95       |
| 1428811_at   | NM_181819     | Wfikkn2         | WAP, follistatin/kazal, immunoglobulin, kunitz    | -1.95       |
| 1416121_at   | NM_010728     | Lox             | lysyl oxidase                                     | -1.95       |
| 1450455_s_at | NM_013777     | Akr1c12 ///     | aldo-keto reductase family 1, member C12 ///      | -1.95       |
| 1427640_a_at | NM_001111026  | Runx1t1         | runt-related transcription factor 1; translocated | -1.95       |
| 1460259_s_at | NM_009899     | Clca1 /// Clca2 | chloride channel calcium activated 1 /// chloride | -1.95       |
| 1439527_at   | NM_008829     | Pgr             | progesterone receptor                             | -1.96       |
| 1455227_at   | NM_178772     | Nceh1           | arylacetamide deacetylase-like 1                  | -1.96       |
| 1436501_at   | NM_001005863  | Mtus1           | mitochondrial tumor suppressor 1                  | -1.96       |
| 1416623_at   | NM_013691     | Thbs3           | thrombospondin 3                                  | -1.96       |
| 1452382_at   | NR_002870     | Dnm3os          | dynamamin 3, opposite strand                      | -1.96       |
| 1452213_at   | NM_198292     | Tex2            | testis expressed gene 2                           | -1.96       |
| 1418318_at   | NM_023270     | Rnf128          | ring finger protein 128                           | -1.96       |
| 1449205_at   | NM_026924     | Ovol2           | ovo-like 2 (Drosophila)                           | -1.96       |
| 1420630_at   | NM_028982     | 8430419L09Rik   | RIKEN cDNA 8430419L09 gene                        | -1.96       |
| 1434193_at   | NM_001099319  | Gm12942         | predicted gene 12942                              | -1.97       |
| 1427673_a_at | NM_011348     | Sema3e          | sema domain, immunoglobulin domain (Ig), short    | -1.97       |
| 1458176_at   | NM_011067     | Per3            | Period homolog 3 (Drosophila)                     | -1.97       |
| 1433626_at   | NM_178711     | Plscr4          | phospholipid scramblase 4                         | -1.97       |
| 1420558_at   | NM_011347     | Selp            | selectin, platelet                                | -1.97       |
| 1424632_a_at | NM_011264     | Rev3l           | REV3-like, catalytic subunit of DNA polymerase    | -1.97       |
| 1438114_x_at | NM_010112     | Efs             | Embryonal Fyn-associated substrate                | -1.97       |
| 1418186_at   | NM_008185     | Gstt1           | glutathione S-transferase, theta 1                | -1.97       |
| 1428960_at   | NM_027728     | Enkur           | enkurin, TRPC channel interacting protein         | -1.97       |
| 1455970_at   | NM_153422     | Pde5a           | phosphodiesterase 5A, cGMP-specific               | -1.97       |
| 1456060_at   | NM_001025577  | Maf             | avian musculoaponeurotic fibrosarcoma (v-maf)     | -1.98       |
| 1449563_at   | NM_001159647  | Cntn1           | contactin 1                                       | -1.98       |
| 1440156_s_at | NM_001098799  | Tox2            | TOX high mobility group box family member 2       | -1.98       |
| 1451601_a_at | NM_153060     | Spns2           | spinster homolog 2 (Drosophila)                   | -1.98       |
| 1420484_a_at | NM_011707     | Vtn             | vitronectin                                       | -1.99       |
| 1456197_x_at | NM_001099299  | Ajap1           | Adherens junction associated protein 1            | -1.99       |
| 1447166_at   | AI891479      | ---             |                                                   | -1.99       |
| 1420683_at   | NM_001168356  | Bnipl           | BCL2/adenovirus E1B 19kD interacting protein      | -1.99       |
| 1439557_s_at | NM_001077398  | Ldb2            | LIM domain binding 2                              | -1.99       |
| 1440085_at   | NM_001161432  | Eda2r           | ectodysplasin A2 receptor                         | -1.99       |
| 1449591_at   | NM_007609     | Casp4           | caspase 4, apoptosis-related cysteine peptidase   | -1.99       |
| 1453152_at   | NM_174857     | Mamdc2          | MAM domain containing 2                           | -1.99       |
| 1448509_at   | NM_025626     | Fam107b         | family with sequence similarity 107, member B     | -1.99       |
| 1419608_a_at | NM_019394     | Mia1            | melanoma inhibitory activity 1                    | -2.00       |
| 1456786_at   | NM_001077398  | Ldb2            | LIM domain binding 2                              | -2.00       |
| 1416635_at   | NM_020561     | Smpdl3a         | sphingomyelin phosphodiesterase, acid-like 3A     | -2.00       |
| 1449265_at   | NM_009807     | Casp1           | caspase 1                                         | -2.00       |

| Probe set    | Accession No. | Symbol        | Gene Title                                      | Fold Change |
|--------------|---------------|---------------|-------------------------------------------------|-------------|
| 1452384_at   | NM_134005     | Enpp3         | ectonucleotide                                  | -2.00       |
| 1449167_at   | NM_013512     | Epb4.1l4a     | erythrocyte protein band 4.1-like 4a            | -2.01       |
| 1451335_at   | NM_139198     | Plac8         | placenta-specific 8                             | -2.01       |
| 1418252_at   | NM_008812     | Padi2         | peptidyl arginine deiminase, type II            | -2.01       |
| 1438658_a_at | NM_010101     | S1pr3         | sphingosine-1-phosphate receptor 3              | -2.01       |
| 1419647_a_at | NM_133662     | Ier3          | immediate early response 3                      | -2.01       |
| 1433965_at   | NM_001038999  | Atp8a1        | ATPase, aminophospholipid transporter (APLT),   | -2.01       |
| 1417395_at   | NM_010637     | Klf4          | Kruppel-like factor 4 (gut)                     | -2.01       |
| 1436294_at   | NM_001190371  | Ankrd29       | ankyrin repeat domain 29                        | -2.01       |
| 1436260_at   | BB131085      | ---           |                                                 | -2.01       |
| 1439990_at   | BB460243      | ---           |                                                 | -2.01       |
| 1449315_at   | NM_001145937  | Odz3          | odd Oz/ten-m homolog 3 (Drosophila)             | -2.01       |
| 1427711_a_at | NM_001039185  | Ceacam1       | carcinoembryonic antigen-related cell adhesion  | -2.02       |
| 1427183_at   | NM_146015     | Efemp1        | epidermal growth factor-containing fibulin-like | -2.02       |
| 1451453_at   | NM_010019     | Dapk2         | death-associated protein kinase 2               | -2.02       |
| 1434528_at   | NM_175503     | Aard          | alanine and arginine rich domain containing     | -2.02       |
| 1427371_at   | NM_153145     | Abca8a        | ATP-binding cassette, sub-family A (ABC1),      | -2.02       |
| 1418424_at   | NM_009398     | Tnfaip6       | tumor necrosis factor alpha induced protein 6   | -2.02       |
| 1429938_at   | BB125806      | A930009E05Rik | RIKEN cDNA A930009E05 gene                      | -2.02       |
| 1453587_at   | NM_027819     | Ggt6          | gamma-glutamyltransferase 6                     | -2.03       |
| 1417071_s_at | NM_133969     | Cyp4v3        | cytochrome P450, family 4, subfamily v,         | -2.03       |
| 1453072_at   | NM_001134385  | Gpr160        | G protein-coupled receptor 160                  | -2.03       |
| 1441412_s_at | NM_001165952  | Trim45        | tripartite motif-containing 45                  | -2.03       |
| 1457321_at   | XM_001474094  | D130037M23Rik | RIKEN cDNA D130037M23 gene                      | -2.04       |
| 1428696_at   | NM_181397     | Rftn1         | raftlin lipid raft linker 1                     | -2.04       |
| 1426268_at   | NM_181323     | Cwh43         | cell wall biogenesis 43 C-terminal homolog (S.  | -2.04       |
| 1435895_at   | NM_175548     | Lsamp         | limbic system-associated membrane protein       | -2.04       |
| 1451527_at   | NM_029620     | Pcolce2       | procollagen C-endopeptidase enhancer 2          | -2.04       |
| 1439260_a_at | NM_134005     | Enpp3         | ectonucleotide                                  | -2.04       |
| 1458040_at   | BM213832      | D7Wsu130e     | DNA segment, Chr 7, Wayne State University 130, | -2.04       |
| 1434423_at   | NM_028450     | Gulp1         | GULP, engulfment adaptor PTB domain             | -2.04       |
| 1452766_at   | NM_182839     | Tppp          | tubulin polymerization promoting protein        | -2.04       |
| 1438610_a_at | NM_009968     | Cryz          | crystallin, zeta                                | -2.05       |
| 1419323_at   | NM_011059     | Padi1         | peptidyl arginine deiminase, type I             | -2.05       |
| 1454254_s_at | NM_029639     | 1600029D21Rik | RIKEN cDNA 1600029D21 gene                      | -2.05       |
| 1453135_at   | NM_027402     | Fndc5         | fibronectin type III domain containing 5        | -2.05       |
| 1444178_at   | XR_106016     | Gm9895 ///    | predicted gene 9895 ///<br>hypothetical         | -2.05       |
| 1436584_at   | NM_011897     | Spry2         | sprouty homolog 2 (Drosophila)                  | -2.05       |
| 1416474_at   | NM_020043     | Igdcc4        | immunoglobulin superfamily, DCC subclass,       | -2.05       |
| 1423933_a_at | NM_029639     | 1600029D21Rik | RIKEN cDNA 1600029D21 gene                      | -2.06       |
| 1436345_at   | NM_028872     | 5730559C18Rik | RIKEN cDNA 5730559C18 gene                      | -2.06       |
| 1421444_at   | NM_008829     | Pgr           | progesterone receptor                           | -2.06       |
| 1417852_x_at | NM_009899     | Clca1         | chloride channel calcium activated 1            | -2.06       |
| 1422851_at   | NM_010441     | Hmga2         | high mobility group AT-hook 2                   | -2.06       |
| 1458659_at   | NM_207229     | Gm10393 ///   | predicted gene 10393 ///<br>placenta specific 9 | -2.06       |

| Probe set    | Accession No. | Symbol        | Gene Title                                         | Fold Change |
|--------------|---------------|---------------|----------------------------------------------------|-------------|
| 1421002_at   | NM_011923     | Angptl2       | angiopoietin-like 2                                | -2.07       |
| 1459971_at   | NM_001081027  | Kcnt2         | potassium channel, subfamily T, member 2           | -2.07       |
| 1430111_a_at | NM_001024468  | Bcat1         | branched chain aminotransferase 1, cytosolic       | -2.07       |
| 1454078_a_at | NM_001177691  | Gal3st1       | galactose-3-O-sulfotransferase 1                   | -2.08       |
| 1434815_a_at | NM_178907     | Mapkapk3      | mitogen-activated protein kinase-activated         | -2.08       |
| 1429178_at   | NM_001145937  | Odz3          | odd Oz/ten-m homolog 3 (Drosophila)                | -2.08       |
| 1422637_at   | NM_018750     | Rassf5        | Ras association (RalGDS/AF-6) domain family        | -2.08       |
| 1417066_at   | NM_001163290  | Adck3         | aarF domain containing kinase 3                    | -2.08       |
| 1454048_a_at | NM_027627     | 4931408A02Rik | RIKEN cDNA 4931408A02 gene                         | -2.08       |
| 1448263_a_at | NM_023149     | Cndp2         | CNDP dipeptidase 2 (metallopeptidase M20           | -2.09       |
| 1417070_at   | NM_133969     | Cyp4v3        | cytochrome P450, family 4, subfamily v,            | -2.09       |
| 1439616_at   | BB167055      | ---           |                                                    | -2.09       |
| 1447808_s_at | NM_001145899  | Slc15a2       | solute carrier family 15 (H+/peptide transporter), | -2.09       |
| 1424966_at   | NM_001168256  | Tmem40        | transmembrane protein 40                           | -2.09       |
| 1435828_at   | NM_001025577  | Maf           | avian musculoaponeurotic fibrosarcoma (v-maf)      | -2.10       |
| 1456130_at   | NM_001164805  | Thsd7a        | thrombospondin, type I, domain containing 7A       | -2.10       |
| 1430355_a_at | NM_001085409  | Steap3        | STEAP family member 3                              | -2.10       |
| 1455257_at   | NM_016780     | Itgb3         | integrin beta 3                                    | -2.10       |
| 1421040_a_at | NM_008182     | Gsta2         | glutathione S-transferase, alpha 2 (Yc2)           | -2.10       |
| 1427020_at   | NM_172604     | Scara3        | scavenger receptor class A, member 3               | -2.11       |
| 1419564_at   | NM_001085415  | Zfp467        | zinc finger protein 467                            | -2.11       |
| 1449310_at   | NM_008964     | Ptger2        | prostaglandin E receptor 2 (subtype EP2)           | -2.11       |
| 1456008_at   | NM_028175     | Lrrc8e        | leucine rich repeat containing 8 family, member E  | -2.11       |
| 1450871_a_at | NM_001024468  | Bcat1         | branched chain aminotransferase 1, cytosolic       | -2.11       |
| 1441572_at   | NM_007831     | Dcc           | deleted in colorectal carcinoma                    | -2.11       |
| 1455697_at   | XM_127791     | Fam124a       | family with sequence similarity 124, member A      | -2.12       |
| 1416950_at   | NM_001177759  | Tnfaip8       | tumor necrosis factor, alpha-induced protein 8     | -2.12       |
| 1454880_s_at | NM_138313     | Bmf           | BCL2 modifying factor                              | -2.12       |
| 1424730_a_at | NM_001145899  | Slc15a2       | solute carrier family 15 (H+/peptide transporter), | -2.13       |
| 1455636_at   | NM_175548     | Lsamp         | limbic system-associated membrane protein          | -2.13       |
| 1438799_at   | NR_015388     | Dlx6os1       | Dlx6 opposite strand transcript 1                  | -2.13       |
| 1429308_at   | NM_001177995  | Prdm16        | PR domain containing 16                            | -2.14       |
| 1447901_x_at | NM_030207     | Sfi1          | Sfi1 homolog, spindle assembly associated (yeast)  | -2.14       |
| 1449036_at   | NM_023270     | Rnf128        | ring finger protein 128                            | -2.14       |
| 1435596_at   | NM_175437     | Pion          | pigeon homolog (Drosophila)                        | -2.14       |
| 1424507_at   | NM_145495     | Rin1          | Ras and Rab interactor 1                           | -2.14       |
| 1438445_at   | NM_028175     | Lrrc8e        | leucine rich repeat containing 8 family, member E  | -2.14       |
| 1439862_at   | NM_001043354  | Rorb          | RAR-related orphan receptor beta                   | -2.14       |
| 1458591_at   | NM_001017427  | Rasef         | RAS and EF hand domain containing                  | -2.14       |
| 1437361_at   | NM_001105561  | Gm11545       | predicted gene 11545                               | -2.15       |
| 1426231_at   | NM_001197028  | Vit           | vitrin                                             | -2.15       |
| 1418492_at   | NM_011825     | Grem2         | gremlin 2 homolog, cysteine knot superfamily       | -2.15       |
| 1427287_s_at | NM_010586     | Itpr2         | inositol 1,4,5-triphosphate receptor 2             | -2.15       |
| 1460177_at   | NM_023149     | Cndp2         | CNDP dipeptidase 2 (metallopeptidase M20           | -2.15       |
| 1456195_x_at | NM_001145884  | Itgb5         | integrin beta 5                                    | -2.15       |

| Probe set    | Accession No. | Symbol        | Gene Title                                        | Fold Change |
|--------------|---------------|---------------|---------------------------------------------------|-------------|
| 1449519_at   | NM_007836     | Gadd45a       | growth arrest and DNA-damage-inducible 45         | -2.16       |
| 1416271_at   | NM_022032     | Perp          | PERP, TP53 apoptosis effector                     | -2.16       |
| 1439680_at   | NM_009425     | Tnfsf10       | tumor necrosis factor (ligand) superfamily,       | -2.16       |
| 1460242_at   | NM_010016     | Cd55          | CD55 antigen                                      | -2.16       |
| 1436566_at   | NM_139147     | Rab40b        | Rab40b, member RAS oncogene family                | -2.16       |
| 1444697_at   | XR_106364     | 4732490B19Rik | RIKEN cDNA 4732490B19 gene                        | -2.17       |
| 1434606_at   | NM_010153     | ErbB3         | v-erb-b2 erythroblastic leukemia viral oncogene   | -2.17       |
| 1451260_at   | NM_028270     | Aldh1b1       | aldehyde dehydrogenase 1 family, member B1        | -2.17       |
| 1455435_s_at | NM_001136240  | Chdh          | choline dehydrogenase                             | -2.17       |
| 1428812_at   | NM_028491     | 1700040L02Rik | RIKEN cDNA 1700040L02 gene                        | -2.17       |
| 1448321_at   | NM_001146217  | Smoc1         | SPARC related modular calcium binding 1           | -2.18       |
| 1435667_at   | NM_001012623  | Rims1         | regulating synaptic membrane exocytosis 1         | -2.18       |
| 1428859_at   | NM_153783     | Paox          | polyamine oxidase (exo-N4-amino)                  | -2.19       |
| 1424220_a_at | NM_016913     | Porcn         | porcupine homolog (Drosophila)                    | -2.19       |
| 1441917_s_at | NM_001168256  | Tmem40        | transmembrane protein 40                          | -2.19       |
| 1431461_at   | AK016843      | 4933417E11Rik | RIKEN cDNA 4933417E11 gene                        | -2.19       |
| 1416564_at   | NM_011446     | Sox7          | SRY-box containing gene 7                         | -2.20       |
| 1426938_at   | NM_021361     | Nova1         | neuro-oncological ventral antigen 1               | -2.20       |
| 1421034_a_at | NM_001008700  | Il4ra         | interleukin 4 receptor, alpha                     | -2.21       |
| 1426787_at   | NM_030207     | Sfi1          | Sfi1 homolog, spindle assembly associated (yeast) | -2.21       |
| 1448964_at   | NM_009789     | S100g         | S100 calcium binding protein G                    | -2.21       |
| 1418925_at   | NM_009886     | CelSR1        | cadherin, EGF LAG seven-pass G-type receptor 1    | -2.21       |
| 1415857_at   | NM_010330     | Emb           | embigin                                           | -2.21       |
| 1434881_s_at | NM_177715     | Kctd12        | potassium channel tetramerisation domain          | -2.22       |
| 1436532_at   | NM_172928     | Dclk3         | doublecortin-like kinase 3                        | -2.22       |
| 1451332_at   | NM_145492     | Zfp521        | zinc finger protein 521                           | -2.22       |
| 1422293_a_at | NM_001142731  | Kctd1         | potassium channel tetramerisation domain          | -2.22       |
| 1455665_at   | NM_001081150  | Lonrf1        | LON peptidase N-terminal domain and ring          | -2.23       |
| 1421761_a_at | NM_013800     | Barx2         | BarH-like homeobox 2                              | -2.24       |
| 1447849_s_at | NM_001025577  | Maf           | avian musculoaponeurotic fibrosarcoma (v-maf)     | -2.24       |
| 1450085_at   | NM_011923     | Angptl2       | angiopoietin-like 2                               | -2.24       |
| 1438423_at   | NM_024186     | Ssbp2         | single-stranded DNA binding protein 2             | -2.26       |
| 1457915_at   | NM_177101     | 4833442J19Rik | RIKEN cDNA 4833442J19 gene                        | -2.26       |
| 1440084_at   | AV380966      | ---           |                                                   | -2.26       |
| 1438165_x_at | NM_012037     | Vat1          | vesicle amine transport protein 1 homolog (T      | -2.26       |
| 1417602_at   | NM_011066     | Per2          | period homolog 2 (Drosophila)                     | -2.27       |
| 1424208_at   | NM_001136079  | Ptger4        | prostaglandin E receptor 4 (subtype EP4)          | -2.27       |
| 1459913_at   | NM_009425     | Tnfsf10       | tumor necrosis factor (ligand) superfamily,       | -2.27       |
| 1427630_x_at | NM_001039185  | Ceacam1       | carcinoembryonic antigen-related cell adhesion    | -2.27       |
| 1421065_at   | NM_001048177  | Jak2          | Janus kinase 2                                    | -2.27       |
| 1420403_at   | NM_001036684  | Atp2b2        | ATPase, Ca++ transporting, plasma membrane 2      | -2.27       |
| 1434581_at   | NM_026629     | 2410066E13Rik | RIKEN cDNA 2410066E13 gene                        | -2.27       |
| 1436600_at   | NM_172913     | Tox3          | TOX high mobility group box family member 3       | -2.28       |
| 1452114_s_at | NM_010518     | Igfbp5        | insulin-like growth factor binding protein 5      | -2.28       |
| 1441727_s_at | NM_001085415  | Zfp467        | zinc finger protein 467                           | -2.28       |



| Probe set    | Accession No. | Symbol        | Gene Title                                      | Fold Change |
|--------------|---------------|---------------|-------------------------------------------------|-------------|
| 1417394_at   | NM_010637     | Klf4          | Kruppel-like factor 4 (gut)                     | -2.28       |
| 1429844_at   | NM_027158     | 2310043J07Rik | RIKEN cDNA 2310043J07 gene                      | -2.29       |
| 1417835_at   | NM_008645     | Mug1          | murinoglobulin 1                                | -2.29       |
| 1434800_at   | NM_001109753  | Sv2b          | synaptic vesicle glycoprotein 2 b               | -2.29       |
| 1438305_at   | NM_001012623  | Rims1         | regulating synaptic membrane exocytosis 1       | -2.29       |
| 1428332_at   | NM_178149     | Pik3ip1       | phosphoinositide-3-kinase interacting protein 1 | -2.29       |
| 1419456_at   | NM_026428     | Dcxr          | dicarbonyl L-xylulose reductase                 | -2.30       |
| 1423323_at   | NM_020047     | Tacstd2       | tumor-associated calcium signal transducer 2    | -2.30       |
| 1427053_at   | NM_001014399  | Abi3bp        | ABI gene family, member 3 (NESH) binding        | -2.30       |
| 1421317_x_at | NM_010848     | Myb           | myeloblastosis oncogene                         | -2.30       |
| 1415856_at   | NM_010330     | Emb           | embigin                                         | -2.31       |
| 1427945_at   | NM_170778     | Dpyd          | dihydropyrimidine dehydrogenase                 | -2.31       |
| 1450781_at   | NM_010441     | Hmga2         | high mobility group AT-hook 2                   | -2.32       |
| 1450194_a_at | NM_010848     | Myb           | myeloblastosis oncogene                         | -2.32       |
| 1427054_s_at | NM_001014399  | Abi3bp        | ABI gene family, member 3 (NESH) binding        | -2.32       |
| 1427512_a_at | NM_010680     | Lama3         | laminin, alpha 3                                | -2.32       |
| 1427387_a_at | NM_001005608  | Itgb4         | integrin beta 4                                 | -2.32       |
| 1437152_at   | NM_175366     | Mex3b         | mex3 homolog B (C. elegans)                     | -2.32       |
| 1436994_a_at | NM_015786     | Hist1h1c      | histone cluster 1, H1c                          | -2.34       |
| 1438512_at   | NM_001193274  | BC048679      | cDNA sequence BC048679                          | -2.34       |
| 1452626_a_at | NM_026928     | 1810014F10Rik | RIKEN cDNA 1810014F10 gene                      | -2.34       |
| 1418091_at   | NM_023755     | Tcfcp211      | transcription factor CP2-like 1                 | -2.35       |
| 1455147_at   | BB177828      | ---           |                                                 | -2.36       |
| 1425538_x_at | NM_001039185  | Ceacam1       | carcinoembryonic antigen-related cell adhesion  | -2.36       |
| 1447936_at   | NR_030738     | 2410006H16Rik | RIKEN cDNA 2410006H16 gene                      | -2.37       |
| 1439699_at   | BB525237      | ---           |                                                 | -2.37       |
| 1435033_at   | NM_183019     | Arhgef4       | Rho guanine nucleotide exchange factor (GEF) 4  | -2.37       |
| 1418930_at   | NM_021274     | Cxcl10        | chemokine (C-X-C motif) ligand 10               | -2.37       |
| 1453231_at   | NM_183294     | Cdk1          | cyclin-dependent kinase-like 1 (CDC2-related    | -2.37       |
| 1440785_at   | NM_212452     | Rxfp1         | relaxin/insulin-like family peptide receptor 1  | -2.38       |
| 1444262_at   | NM_001162998  | 1110017F19Rik | RIKEN cDNA 1110017F19 gene                      | -2.38       |
| 1427521_a_at | NM_001164263  | 9930023K05Rik | RIKEN cDNA 9930023K05 gene                      | -2.39       |
| 1438097_at   | NM_011227     | Rab20         | RAB20, member RAS oncogene family               | -2.39       |
| 1434295_at   | NM_011246     | Rasgrp1       | RAS guanyl releasing protein 1                  | -2.39       |
| 1427344_s_at | NM_029182     | Rasd2         | RASD family, member 2                           | -2.39       |
| 1456510_x_at | NM_001002900  | Higd1c ///    | HIG1 domain family, member 1C ///               | -2.40       |
| 1419468_at   | NM_025809     | Clec14a       | C-type lectin domain family 14, member a        | -2.40       |
| 1435337_at   | NM_172298     | Tshz3         | teashirt zinc finger family member 3            | -2.40       |
| 1435296_at   | NM_007418     | Adra2c        | adrenergic receptor, alpha 2c                   | -2.40       |
| 1450780_s_at | NM_010441     | Hmga2         | high mobility group AT-hook 2                   | -2.41       |
| 1440870_at   | NM_001177995  | Prdm16        | PR domain containing 16                         | -2.41       |
| 1433827_at   | NM_001038999  | Atp8a1        | ATPase, aminophospholipid transporter (APLT),   | -2.41       |
| 1418417_at   | NM_010827     | Msc           | musculin                                        | -2.42       |
| 1422638_s_at | NM_018750     | Rassf5        | Ras association (RalGDS/AF-6) domain family     | -2.42       |
| 1419326_at   | NM_026188     | 1700028P14Rik | RIKEN cDNA 1700028P14 gene                      | -2.42       |

| Probe set    | Accession No. | Symbol        | Gene Title                                          | Fold Change |
|--------------|---------------|---------------|-----------------------------------------------------|-------------|
| 1427302_at   | NM_134005     | Enpp3         | ectonucleotide                                      | -2.43       |
| 1443906_at   | NM_010016     | Cd55          | CD55 antigen                                        | -2.43       |
| 1455772_at   | NM_008829     | Pgr           | progesterone receptor                               | -2.44       |
| 1421912_at   | NM_011397     | Slc23a1       | solute carrier family 23 (nucleobase transporters), | -2.45       |
| 1417884_at   | NM_001029842  | Slc16a6       | solute carrier family 16 (monocarboxylic acid       | -2.45       |
| 1428663_at   | NM_028943     | Sgms2         | sphingomyelin synthase 2                            | -2.45       |
| 1451424_at   | NM_146017     | Gabrp         | gamma-aminobutyric acid (GABA) A receptor, pi       | -2.45       |
| 1438756_at   | NM_001190371  | Ankrd29       | ankyrin repeat domain 29                            | -2.45       |
| 1444740_at   | NM_001164201  | Lass3         | LAG1 homolog, ceramide synthase 3                   | -2.46       |
| 1452473_at   | NM_030024     | Prr15         | proline rich 15                                     | -2.46       |
| 1417756_a_at | NM_001136071  | Lsp1          | lymphocyte specific 1                               | -2.46       |
| 1455477_s_at | NM_001164557  | Pdzk1ip1      | PDZK1 interacting protein 1                         | -2.47       |
| 1440339_at   | NM_008813     | Enpp1         | ectonucleotide                                      | -2.47       |
| 1434151_at   | NM_027334     | Mettl7a1      | methyltransferase like 7A1                          | -2.48       |
| 1448600_s_at | NM_020505     | Vav3          | vav 3 oncogene                                      | -2.48       |
| 1429313_at   | NM_013845     | Ror1          | receptor tyrosine kinase-like orphan receptor 1     | -2.48       |
| 1429679_at   | NM_028977     | Lrrc17        | leucine rich repeat containing 17                   | -2.48       |
| 1429918_at   | NM_175535     | Arhgap20      | Rho GTPase activating protein 20                    | -2.48       |
| 1454942_at   | NM_022018     | Fam129a       | family with sequence similarity 129, member A       | -2.49       |
| 1448640_at   | NM_001171010  | Slc14a1       | solute carrier family 14 (urea transporter),        | -2.49       |
| 1448566_at   | NM_016917     | Slc40a1       | solute carrier family 40 (iron-regulated            | -2.51       |
| 1454858_x_at | NM_027334     | Mettl7a1      | methyltransferase like 7A1                          | -2.51       |
| 1448299_at   | NM_009199     | Slc1a1        | solute carrier family 1 (neuronal/epithelial high   | -2.52       |
| 1427946_s_at | NM_170778     | Dpyd          | dihydropyrimidine dehydrogenase                     | -2.52       |
| 1437876_at   | NM_001033543  | Il20rb        | interleukin 20 receptor beta                        | -2.53       |
| 1419467_at   | NM_025809     | Clec14a       | C-type lectin domain family 14, member a            | -2.55       |
| 1417061_at   | NM_016917     | Slc40a1       | solute carrier family 40 (iron-regulated            | -2.55       |
| 1417575_at   | NM_001177841  | Otub2         | OTU domain, ubiquitin aldehyde binding 2            | -2.55       |
| 1437270_a_at | NM_019952     | Clcf1         | cardiotrophin-like cytokine factor 1                | -2.55       |
| 1437292_at   | NM_175448     | Clvs2         | clavesin 2                                          | -2.56       |
| 1416617_at   | NM_080575     | Acss1         | acyl-CoA synthetase short-chain family member 1     | -2.56       |
| 1456036_x_at | NM_010362     | Gsto1         | glutathione S-transferase omega 1                   | -2.57       |
| 1440000_at   | NR_026942     | E330013P04Rik | RIKEN cDNA E330013P04 gene                          | -2.58       |
| 1417122_at   | NM_020505     | Vav3          | vav 3 oncogene                                      | -2.58       |
| 1423619_at   | NM_009026     | Rasd1         | RAS, dexamethasone-induced 1                        | -2.59       |
| 1440487_at   | NM_007831     | Dcc           | deleted in colorectal carcinoma                     | -2.59       |
| 1424007_at   | NM_145741     | Gdf10         | growth differentiation factor 10                    | -2.59       |
| 1429664_at   | NM_183294     | Cdk1          | cyclin-dependent kinase-like 1 (CDC2-related        | -2.60       |
| 1451596_a_at | NM_001172472  | Sphk1         | sphingosine kinase 1                                | -2.60       |
| 1434210_s_at | NM_008377     | Lrig1         | leucine-rich repeats and immunoglobulin-like        | -2.60       |
| 1420378_at   | NM_009160     | Sftpd         | surfactant associated protein D                     | -2.62       |
| 1419420_at   | NM_012028     | St6galnac5    | ST6 (alpha-N-acetyl-neuraminyl-2,3-beta-            | -2.62       |
| 1455699_at   | NM_001024468  | Bcat1         | branched chain aminotransferase 1, cytosolic        | -2.62       |
| 1452981_at   | NM_001159647  | Cntn1         | contactin 1                                         | -2.63       |
| 1424010_at   | NM_029568     | Mfap4         | microfibrillar-associated protein 4                 | -2.64       |

| Probe set    | Accession No. | Symbol        | Gene Title                                        | Fold Change |
|--------------|---------------|---------------|---------------------------------------------------|-------------|
| 1417689_a_at | NM_001164557  | Pdzk1ip1      | PDZK1 interacting protein 1                       | -2.65       |
| 1456929_at   | BM235852      | BC042782      | cDNA sequence BC042782                            | -2.65       |
| 1452358_at   | NM_001103367  | Rai2          | retinoic acid induced 2                           | -2.66       |
| 1444524_at   | NR_028589     | Gm14005       | predicted gene 14005                              | -2.66       |
| 1434526_at   | NM_001001804  | Ephx4         | epoxide hydrolase 4                               | -2.66       |
| 1439301_at   | BM240022      | ---           |                                                   | -2.67       |
| 1447173_at   | XR_002334     | Lrrc31        | leucine rich repeat containing 31                 | -2.67       |
| 1449082_at   | NM_015776     | Mfap5         | microfibrillar associated protein 5               | -2.68       |
| 1452065_at   | NM_145967     | Vstm2a        | V-set and transmembrane domain containing 2A      | -2.68       |
| 1420402_at   | NM_001036684  | Atp2b2        | ATPase, Ca++ transporting, plasma membrane 2      | -2.70       |
| 1441926_x_at | NM_146260     | Tmie          | transmembrane inner ear                           | -2.71       |
| 1449893_a_at | NM_008377     | Lrig1         | leucine-rich repeats and immunoglobulin-like      | -2.71       |
| 1428114_at   | NM_001171010  | Slc14a1       | solute carrier family 14 (urea transporter),      | -2.71       |
| 1423468_at   | NM_001085409  | Steap3        | STEAP family member 3                             | -2.72       |
| 1450798_at   | NM_031176     | Tnxb          | tenascin XB                                       | -2.73       |
| 1418762_at   | NM_010016     | Cd55          | CD55 antigen                                      | -2.77       |
| 1439066_at   | NM_009640     | Angpt1        | angiopoietin 1                                    | -2.77       |
| 1434194_at   | NM_001039934  | Mtap2         | microtubule-associated protein 2                  | -2.77       |
| 1458324_x_at | BB208251      | ---           |                                                   | -2.77       |
| 1418174_at   | NM_016974     | Dbp           | D site albumin promoter binding protein           | -2.78       |
| 1425092_at   | NM_009865     | Cdh10         | cadherin 10                                       | -2.78       |
| 1418126_at   | NM_013653     | Ccl5          | chemokine (C-C motif) ligand 5                    | -2.79       |
| 1416531_at   | NM_010362     | Gsto1         | glutathione S-transferase omega 1                 | -2.79       |
| 1455090_at   | NM_011923     | Angptl2       | angiopoietin-like 2                               | -2.79       |
| 1426147_s_at | NM_001160096  | Cldn10        | claudin 10                                        | -2.81       |
| 1454728_s_at | NM_001038999  | Atp8a1        | ATPase, aminophospholipid transporter (APLT),     | -2.81       |
| 1438211_s_at | NM_016974     | Dbp           | D site albumin promoter binding protein           | -2.82       |
| 1447227_at   | AI504711      | ---           |                                                   | -2.84       |
| 1457619_at   | NM_198171     | Ces2b         | carboxyesterase 2B                                | -2.85       |
| 1434150_a_at | NM_001002900  | Higd1c ///    | HIG1 domain family, member 1C ///                 | -2.89       |
| 1421073_a_at | NM_001136079  | Ptger4        | prostaglandin E receptor 4 (subtype EP4)          | -2.91       |
| 1452716_at   | NM_027464     | 5730469M10Rik | RIKEN cDNA 5730469M10 gene                        | -2.92       |
| 1424902_at   | NM_001163608  | Plxdc1        | plexin domain containing 1                        | -2.95       |
| 1427063_at   | NM_001033304  | 5330417C22Rik | RIKEN cDNA 5330417C22 gene                        | -2.97       |
| 1428547_at   | NM_011851     | Nt5e          | 5' nucleotidase, ecto                             | -2.97       |
| 1429072_at   | NM_026763     | Col6a4        | collagen, type VI, alpha 4                        | -2.98       |
| 1449319_at   | NM_138683     | Rspo1         | R-spondin homolog (Xenopus laevis)                | -3.02       |
| 1442226_at   | NM_011348     | Sema3e        | sema domain, immunoglobulin domain (Ig), short    | -3.06       |
| 1450112_a_at | NM_008087     | Gas2          | growth arrest specific 2                          | -3.08       |
| 1425415_a_at | NM_009199     | Slc1a1        | solute carrier family 1 (neuronal/epithelial high | -3.09       |
| 1417995_at   | NM_008979     | Ptpn22        | protein tyrosine phosphatase, non-receptor type   | -3.12       |
| 1423367_at   | NM_009527     | Wnt7a         | wingless-related MMTV integration site 7A         | -3.13       |
| 1418979_at   | NM_134072     | Akr1c14       | aldo-keto reductase family 1, member C14          | -3.14       |
| 1455396_at   | NM_001001488  | Atp8b1        | ATPase, class I, type 8B, member 1                | -3.15       |
| 1424409_at   | NM_027998     | Cldn23        | claudin 23                                        | -3.15       |

| Probe set    | Accession No. | Symbol                            | Gene Title                                                                                                                   | Fold Change |
|--------------|---------------|-----------------------------------|------------------------------------------------------------------------------------------------------------------------------|-------------|
| 1419571_at   | NM_022317     | Slc28a3                           | solute carrier family 28 (sodium-coupled                                                                                     | -3.16       |
| 1426047_a_at | NM_001161838  | Ptprr                             | protein tyrosine phosphatase, receptor type, R                                                                               | -3.16       |
| 1419070_at   | NM_001004455  | Cys1                              | cystin 1                                                                                                                     | -3.18       |
| 1432418_a_at | NM_009897     | Ckmt1                             | creatine kinase, mitochondrial 1, ubiquitous                                                                                 | -3.21       |
| 1433434_at   | NM_178737     | AW551984                          | expressed sequence AW551984                                                                                                  | -3.22       |
| 1439528_at   | NM_001081664  | 4833423E24Rik                     | RIKEN cDNA 4833423E24 gene                                                                                                   | -3.25       |
| 1422178_a_at | NM_001159725  | Rab17                             | RAB17, member RAS oncogene family                                                                                            | -3.25       |
| 1418454_at   | NM_015776     | Mfap5                             | microfibrillar associated protein 5                                                                                          | -3.25       |
| 1419615_at   | NM_022413     | Trpv6                             | transient receptor potential cation channel,                                                                                 | -3.27       |
| 1455561_at   | NM_177450     | Cndp1                             | carnosine dipeptidase 1 (metallopeptidase M20                                                                                | -3.29       |
| 1455528_at   | AI315686      | ---                               |                                                                                                                              | -3.29       |
| 1419717_at   | NM_011348     | Sema3e                            | sema domain, immunoglobulin domain (Ig), short                                                                               | -3.31       |
| 1422945_a_at | NM_008449     | Kif5c                             | kinesin family member 5C                                                                                                     | -3.36       |
| 1444687_at   | NM_207233     | C1ql2                             | complement component 1, q subcomponent-like                                                                                  | -3.46       |
| 1455516_at   | NM_153409     | Csrnp3                            | cysteine-serine-rich nuclear protein 3                                                                                       | -3.48       |
| 1421087_at   | NM_011067     | Per3                              | period homolog 3 (Drosophila)                                                                                                | -3.49       |
| 1428485_at   | NM_178396     | Car12                             | carbonic anyhydrase 12                                                                                                       | -3.56       |
| 1447774_x_at | NM_027464     | 5730469M10Rik                     | RIKEN cDNA 5730469M10 gene                                                                                                   | -3.61       |
| 1429381_x_at | AK007826      | Igh-2 /// Igh-VJ558 /// LOC544903 | immunoglobulin heavy chain 2 (serum IgA) /// immunoglobulin heavy chain (J558 family) /// similar to immunoglobulin mu-chain | -3.63       |
| 1448973_at   | NM_016771     | Sult1d1                           | sulfotransferase family 1D, member 1                                                                                         | -3.71       |
| 1418724_at   | NM_007686     | Cfi                               | complement component factor i                                                                                                | -3.72       |
| 1448107_x_at | NM_010639     | Klk1                              | kallikrein 1                                                                                                                 | -3.73       |
| 1433888_at   | NM_001036684  | Atp2b2                            | ATPase, Ca++ transporting, plasma membrane 2                                                                                 | -3.74       |
| 1434136_at   | NM_177013     | Tmem229a                          | transmembrane protein 229A                                                                                                   | -3.76       |
| 1418858_at   | NM_023617     | Aox3                              | aldehyde oxidase 3                                                                                                           | -3.79       |
| 1436223_at   | NM_177290     | Itgb8                             | integrin beta 8                                                                                                              | -3.81       |
| 1451204_at   | NM_001168318  | Scara5                            | scavenger receptor class A, member 5 (putative)                                                                              | -3.86       |
| 1418138_at   | NM_016771     | Sult1d1                           | sulfotransferase family 1D, member 1                                                                                         | -3.91       |
| 1417089_a_at | NM_009897     | Ckmt1                             | creatine kinase, mitochondrial 1, ubiquitous                                                                                 | -3.93       |
| 1417408_at   | NM_010171     | F3                                | coagulation factor III                                                                                                       | -3.93       |
| 1455186_a_at | NM_029821     | 1190003J15Rik                     | RIKEN cDNA 1190003J15 gene                                                                                                   | -3.96       |
| 1418697_at   | NM_009349     | Inmt                              | indolethylamine N-methyltransferase                                                                                          | -3.98       |
| 1453442_at   | AK009785      | 2310043M15Rik                     | RIKEN cDNA 2310043M15 gene                                                                                                   | -4.02       |
| 1427660_x_at | BC013496      | Gm10883 ///                       | predicted gene 10883 /// predicted gene 1420 ///                                                                             | -4.13       |
| 1431786_s_at | NM_029821     | 1190003J15Rik                     | RIKEN cDNA 1190003J15 gene                                                                                                   | -4.18       |
| 1418207_at   | NM_001173372  | Fxyd4                             | FXDY domain-containing ion transport regulator                                                                               | -4.18       |
| 1454903_at   | NM_033217     | Ngfr                              | nerve growth factor receptor (TNFR superfamily,                                                                              | -4.38       |
| 1455266_at   | NM_008449     | Kif5c                             | kinesin family member 5C                                                                                                     | -4.39       |
| 1451440_at   | NM_139134     | Chodl                             | chondrolectin                                                                                                                | -4.50       |
| 1442113_at   | NM_001033304  | 5330417C22Rik                     | RIKEN cDNA 5330417C22 gene                                                                                                   | -4.69       |
| 1422789_at   | NM_009022     | Aldh1a2                           | aldehyde dehydrogenase family 1, subfamily A2                                                                                | -4.80       |
| 1420539_a_at | NM_133709     | Chrdl2                            | chordin-like 2                                                                                                               | -4.88       |
| 1415837_at   | NM_010639     | Klk1                              | kallikrein 1                                                                                                                 | -4.95       |

| Probe set    | Accession No. | Symbol         | Gene Title                                      | Fold Change |
|--------------|---------------|----------------|-------------------------------------------------|-------------|
| 1427044_a_at | NM_175007     | Amph           | amphiphysin                                     | -5.11       |
| 1438671_at   | NM_172994     | Ppp2r2c        | protein phosphatase 2 (formerly 2A), regulatory | -5.41       |
| 1425763_x_at | BC019425      | Igh-2 /// Igh- | immunoglobulin heavy chain 2 (serum IgA) ///    | -5.57       |
| 1417785_at   | NM_134102     | Pla1a          | phospholipase A1 member A                       | -5.59       |
| 1433529_at   | NM_173749     | Pamr1          | peptidase domain containing associated with     | -5.88       |
| 1419476_at   | NM_021475     | Adamdec1       | ADAM-like, decysin 1                            | -6.11       |
| 1426858_at   | NM_008381     | Inhbb          | inhibin beta-B                                  | -6.18       |
| 1442143_at   | NM_178773     | Ano4           | anoctamin 4                                     | -6.81       |
| 1416761_at   | NM_008289     | Hsd11b2        | hydroxysteroid 11-beta dehydrogenase 2          | -6.92       |
| 1417789_at   | NM_011330     | Ccl11          | chemokine (C-C motif) ligand 11                 | -7.13       |
| 1421653_a_at | NM_134051     | Igh-2 /// Igh- | immunoglobulin heavy chain 2 (serum IgA) ///    | -7.60       |
| 1436279_at   | NM_145947     | Slc26a7        | solute carrier family 26, member 7              | -11.80      |

**Table S3. Direct target genes of  $\beta$ -catenin**

| Probe Set    | Accession No.                              | Symbol        | Gene Title                                                                          | Fold Change | Chr | Gene Start | Gene End  | Interval Dists to Start | Interval Pos                       | Avg Peak |
|--------------|--------------------------------------------|---------------|-------------------------------------------------------------------------------------|-------------|-----|------------|-----------|-------------------------|------------------------------------|----------|
| 1454866_s_at | NM_172469                                  | Clic6         | chloride intracellular channel 6                                                    | 62.35       | 16  | 92498392   | 92541486  | 84243208                | in gene, in gene, in gene          | 5.33     |
| 1425425_a_at | NM_011915                                  | Wif1          | Wnt inhibitory factor 1                                                             | 18.13       | 10  | 120471286  | 120537698 | -326                    | upstream                           | 4.00     |
| 1434165_at   | NM_172469                                  | Clic6         | chloride intracellular channel 6                                                    | 14.07       | 16  | 92498392   | 92541486  | 84243208                | in gene, in gene, in gene          | 5.33     |
| 1417676_a_at | NM_011216                                  | Ptpro         | protein tyrosine phosphatase, receptor type, O                                      | 13.44       | 6   | 137200986  | 137411754 | 110174                  | in gene                            | 4.00     |
| 1453645_at   | XM_001002365, XM_984603                    | 2700046A07Rik | RIKEN cDNA 2700046A07 gene                                                          | 10.42       | 18  | 62911328   | 62915969  | 321                     | in gene                            | 5.00     |
| 1421262_at   | NM_010720                                  | Lipg          | lipase, endothelial                                                                 | 7.79        | 18  | 75099017   | 75120760  | -9064                   | upstream                           | 6.00     |
| 1424556_at   | NM_144795                                  | Pycr1         | pyrroline-5-carboxylate reductase 1                                                 | 7.75        | 11  | 120497026  | 120504984 | 9992                    | downstream                         | 6.00     |
| 1429506_at   | NM_027280                                  | Nkd1          | naked cuticle 1 homolog (Drosophila)                                                | 7.69        | 8   | 91045269   | 91116225  | 1.69393E+19             | in gene, in gene, in gene, in gene | 8.00     |
| 1421679_a_at | NM_007669                                  | Cdkn1a        | cyclin-dependent kinase inhibitor 1A (P21)                                          | 7.64        | 17  | 29230720   | 29237667  | -10208                  | upstream                           | 5.00     |
| 1422941_at   | NM_053116                                  | Wnt16         | wingless-related MMTV integration site 16                                           | 7.05        | 6   | 22238230   | 22248522  | 1162                    | in gene                            | 5.00     |
| 1422914_at   | NM_022435                                  | Sp5           | trans-acting transcription factor 5                                                 | 6.63        | 2   | 70312980   | 70315783  | -3721756                | upstream, in gene                  | 5.50     |
| 1430118_at   | XM_001002365, XM_984603                    | 2700046A07Rik | RIKEN cDNA 2700046A07 gene                                                          | 6.60        | 18  | 62911328   | 62915969  | 321                     | in gene                            | 5.00     |
| 1418457_at   | NM_019568                                  | Cxcl14        | chemokine (C-X-C motif) ligand 14                                                   | 6.31        | 13  | 56390004   | 56397912  | 8872                    | downstream                         | 6.00     |
| 1418003_at   | NM_025427                                  | 1190002H23Rik | RIKEN cDNA 1190002H23 gene                                                          | 6.24        | 14  | 79688557   | 79701442  | 130                     | in gene                            | 5.00     |
| 1436845_at   | NM_015732                                  | Axin2         | axin2                                                                               | 6.11        | 11  | 108781680  | 108812097 | 776                     | in gene                            | 5.00     |
| 1438511_a_at | NM_025427                                  | 1190002H23Rik | RIKEN cDNA 1190002H23 gene                                                          | 6.11        | 14  | 79688557   | 79701442  | 130                     | in gene                            | 5.00     |
| 1450188_s_at | NM_010720                                  | Lipg          | lipase, endothelial                                                                 | 6.06        | 18  | 75099017   | 75120760  | -9064                   | upstream                           | 6.00     |
| 1440617_at   | NM_177834                                  | Cpa6          | carboxypeptidase A6                                                                 | 5.69        | 1   | 10314808   | 10710024  | 8808                    | in gene                            | 6.00     |
| 1449286_at   | NM_030699                                  | Ntng1         | netrin G1                                                                           | 5.65        | 3   | 109584024  | 109946146 | 264130                  | in gene                            | 5.00     |
| 1417278_a_at | NM_027280                                  | Nkd1          | naked cuticle 1 homolog (Drosophila)                                                | 5.61        | 8   | 91045269   | 91116225  | 1.69393E+19             | in gene, in gene, in gene, in gene | 8.00     |
| 1424638_at   | NM_007669                                  | Cdkn1a        | cyclin-dependent kinase inhibitor 1A (P21)                                          | 5.55        | 17  | 29230720   | 29237667  | -10208                  | upstream                           | 5.00     |
| 1419465_at   | NM_028186                                  | Nkd2          | naked cuticle 2 homolog (Drosophila)                                                | 5.21        | 13  | 73957581   | 73985060  | 2660                    | in gene                            | 6.00     |
| 1419466_at   | NM_028186                                  | Nkd2          | naked cuticle 2 homolog (Drosophila)                                                | 5.09        | 13  | 73957581   | 73985060  | 2660                    | in gene                            | 6.00     |
| 1451054_at   | NM_008768                                  | Orm1          | orosomucoid 1                                                                       | 4.87        | 4   | 63005600   | 63009196  | 6304                    | downstream                         | 6.00     |
| 1434275_at   | NM_028186                                  | Nkd2          | naked cuticle 2 homolog (Drosophila)                                                | 4.80        | 13  | 73957581   | 73985060  | 2660                    | in gene                            | 6.00     |
| 1423854_a_at | NM_026878                                  | Rasl1b        | RAS-like, family 11, member B                                                       | 4.74        | 5   | 74591351   | 74595502  | 6409                    | downstream                         | 5.00     |
| 1418456_a_at | NM_019568                                  | Cxcl14        | chemokine (C-X-C motif) ligand 14                                                   | 4.60        | 13  | 56390004   | 56397912  | 8872                    | downstream                         | 6.00     |
| 1435026_at   | NM_052994                                  | Spock2        | sparc/osteonectin, cwcv and kazal-like domains proteoglycan 2                       | 4.22        | 10  | 59569005   | 59596662  | -7293                   | upstream                           | 5.00     |
| 1422758_at   | NM_018763                                  | Chst2         | carbohydrate sulfotransferase 2                                                     | 3.85        | 9   | 95304920   | 95307141  | 48                      | in gene                            | 5.00     |
| 1448147_at   | NM_013869                                  | Tnfrsf19      | tumor necrosis factor receptor superfamily, member 19                               | 3.45        | 14  | 61582873   | 61665306  | 5017533946              | in gene, in gene                   | 5.50     |
| 1439251_at   | NM_008325                                  | Idua          | lduronidase, alpha-L-                                                               | 3.41        | 5   | 109098384  | 109113573 | 5360                    | in gene                            | 7.00     |
| 1452260_at   | NM_178373                                  | Cidec         | cell death-inducing DFFA-like effector c                                            | 3.35        | 6   | 113374630  | 113385749 | 17760                   | downstream                         | 6.00     |
| 1425212_a_at | NM_013869                                  | Tnfrsf19      | tumor necrosis factor receptor superfamily, member 19                               | 3.30        | 14  | 61582873   | 61665306  | 5017533946              | in gene, in gene                   | 5.50     |
| 1415936_at   | NM_013867                                  | Bcar3         | breast cancer anti-estrogen resistance 3                                            | 3.25        | 3   | 122122745  | 122233101 | 42791                   | in gene                            | 5.00     |
| 1417230_at   | NM_023884                                  | Ralgps2       | Ral GEF with PH domain and SH3 binding motif 2                                      | 3.20        | 1   | 158738253  | 158869711 | 751                     | in gene                            | 5.00     |
| 1433972_at   | NM_001081557                               | Camta1        | calmodulin binding transcription activator 1                                        | 3.14        | 4   | 150433635  | 151235855 | 5.71599E+23             | in gene, in gene, in gene, in gene | 7.00     |
| 1424096_at   | NM_027011                                  | Krt5          | keratin 5                                                                           | 3.13        | 15  | 101537501  | 101543322 | -5750                   | upstream                           | 6.00     |
| 1429273_at   | NM_028472                                  | Bmper         | BMP-binding endothelial regulator                                                   | 3.12        | 9   | 23027520   | 23289646  | 177008                  | in gene                            | 7.00     |
| 1434089_at   | XM_001479956, XM_001479958, XM_981156      | Synpo         | synaptopodin                                                                        | 3.04        | 18  | 60753627   | 60784227  | 2933128387              | in gene, in gene                   | 6.50     |
| 1452309_at   | NM_026599                                  | Cgln1         | cingulin-like 1                                                                     | 3.04        | 9   | 71474316   | 71619409  | 1.24337E+21             | in gene, in gene, in gene, in gene | 6.75     |
| 1438713_at   | NM_027760                                  | Rassf8        | Ras association (RalGDS/AF-6) domain family (N-terminal) member 8                   | 2.91        | 6   | 145756903  | 145766104 | -3927                   | upstream                           | 7.00     |
| 1418326_at   | NM_011404                                  | Slc7a5        | solute carrier family 7 (cationic amino acid transporter, y+ system), member 5      | 2.91        | 8   | 124405050  | 124431571 | 3496332467              | downstream, downstream             | 8.00     |
| 1419748_at   | NM_011994                                  | Abcd2         | ATP-binding cassette, sub-family D (ALD), member 2                                  | 2.89        | 15  | 90976302   | 91022238  | 1550                    | in gene                            | 6.00     |
| 1424704_at   | NM_009820                                  | Runx2         | run1 related transcription factor 2                                                 | 2.85        | 17  | 44740950   | 44951576  | 1.66472E+16             | in gene, in gene, in gene          | 5.33     |
| 1422479_at   | NM_019811                                  | Acss2         | acyl-CoA synthetase short-chain family member 2                                     | 2.84        | 2   | 155343779  | 155388479 | 77                      | in gene                            | 6.00     |
| 1416612_at   | NM_009994                                  | Cyp1b1        | cytochrome P450, family 1, subfamily b, polypeptide 1                               | 2.79        | 17  | 80106293   | 80114381  | -1747                   | upstream                           | 5.00     |
| 1428789_at   | NM_023884                                  | Ralgps2       | Ral GEF with PH domain and SH3 binding motif 2                                      | 2.63        | 1   | 158738253  | 158869711 | 751                     | in gene                            | 5.00     |
| 1420796_at   | NM_009644                                  | Ahr           | aryl-hydrocarbon receptor repressor                                                 | 2.59        | 13  | 74348566   | 74429757  | 46557                   | in gene                            | 8.00     |
| 1449342_at   | NM_023587                                  | Ptplb         | protein tyrosine phosphatase-like (proline instead of catalytic arginine), member b | 2.49        | 16  | 35022507   | 35109261  | -59                     | upstream                           | 7.00     |
| 1437329_at   | NM_023587                                  | Ptplb         | protein tyrosine phosphatase-like (proline instead of catalytic arginine), member b | 2.47        | 16  | 35022507   | 35109261  | -59                     | upstream                           | 7.00     |
| 1420425_at   | NM_007548                                  | Prdm1         | PR domain containing 1, with ZNF domain                                             | 2.46        | 10  | 44156983   | 44178554  | 18282                   | in gene                            | 4.00     |
| 1421841_at   | NM_008010                                  | Fgfr3         | fibroblast growth factor receptor 3                                                 | 2.46        | 5   | 34064373   | 34079712  | -5061                   | upstream                           | 6.00     |
| 1420731_a_at | NM_007792                                  | Csrp2         | cysteine and glycine-rich protein 2                                                 | 2.44        | 10  | 110357235  | 110376678 | -115                    | upstream                           | 8.00     |
| 1418908_at   | NM_013626                                  | Pam           | peptidylglycine alpha-amidating monooxygenase                                       | 2.44        | 1   | 99717671   | 99873836  | 61228                   | in gene                            | 5.00     |
| 1452514_a_at | NM_021099                                  | Kit           | kit oncogene                                                                        | 2.42        | 5   | 75971049   | 76052747  | 11847                   | in gene                            | 5.00     |
| 1438012_at   | NM_178726                                  | Ppm1l         | protein phosphatase 1 (formerly 2C)-like                                            | 2.41        | 3   | 69120840   | 69359326  | 22792                   | in gene                            | 6.00     |
| 1453022_at   | NM_026730                                  | Cpihbp1       | GPI-anchored HDL-binding protein 1                                                  | 2.40        | 15  | 75427088   | 75428643  | 2245                    | downstream                         | 5.00     |
| 1417697_at   | NM_009230                                  | Soat1         | sterol O-acetyltransferase 1                                                        | 2.39        | 1   | 158358239  | 158404459 | -117                    | upstream                           | 5.00     |
| 1423258_at   | NM_021889                                  | Syt9          | synaptotagmin IX                                                                    | 2.39        | 7   | 114514304  | 114692169 | 16                      | in gene                            | 6.00     |
| 1430425_at   | NM_172800                                  | Sdk2          | sidekick homolog 2 (chicken)                                                        | 2.34        | 11  | 113642104  | 113927265 | 1.1925E+11              | in gene, in gene, in gene          | 6.00     |
| 1457038_at   | NM_172862                                  | Frem2         | Fras1 related extracellular matrix protein 2                                        | 2.31        | 3   | 53317860   | 53461277  | 57965                   | in gene                            | 5.00     |
| 1423285_at   | NM_007728                                  | Coch          | coagulation factor C homolog (Limulus polyphemus)                                   | 2.28        | 12  | 52694442   | 52706760  | 374                     | in gene                            | 5.00     |
| 1433719_at   | NM_177909                                  | Slc9a9        | solute carrier family 9 (sodium/hydrogen exchanger), member 9                       | 2.26        | 9   | 94570337   | 95130864  | -10089199359            | upstream, in gene                  | 5.50     |
| 1451458_at   | NM_001033759, NM_031997                    | Tmem2         | transmembrane protein 2                                                             | 2.25        | 19  | 21852832   | 21932817  | 52256                   | in gene                            | 5.00     |
| 1452283_at   | NM_027760                                  | Rassf8        | Ras association (RalGDS/AF-6) domain family (N-terminal) member 8                   | 2.18        | 6   | 145756903  | 145766104 | -3927                   | upstream                           | 7.00     |
| 1425863_a_at | NM_011216                                  | Ptpro         | protein tyrosine phosphatase, receptor type, O                                      | 2.18        | 6   | 137200986  | 137411754 | 110174                  | in gene                            | 4.00     |
| 1435551_at   | NM_175276                                  | Fhod3         | formin homology 2 domain containing 3                                               | 2.16        | 18  | 24867946   | 25292002  | 172950                  | in gene                            | 5.00     |
| 1417801_a_at | NM_008905                                  | Ppfbp2        | PTPRF interacting protein, binding protein 2 (liprin beta 2)                        | 2.15        | 7   | 114738780  | 114888399 | 79876                   | in gene                            | 5.00     |
| 1450863_a_at | NM_019978                                  | Dclk1         | doublecortin-like kinase 1                                                          | 2.15        | 3   | 55046550   | 55340600  | 153802                  | in gene                            | 4.00     |
| 1429209_at   | NM_153393                                  | Col23a1       | collagen, type XXIII, alpha 1                                                       | 2.14        | 11  | 51103422   | 51394612  | 1.3293E+11              | in gene, in gene                   | 6.50     |
| 1450451_at   | NM_052994                                  | Spock2        | sparc/osteonectin, cwcv and kazal-like domains proteoglycan 2                       | 2.14        | 10  | 59569005   | 59596662  | -7293                   | upstream                           | 5.00     |
| 1426981_at   | XM_355911, XM_886136, XM_905687, XM_919493 | Pcsk6         | proprotein convertase subtilisin/kexin type 6                                       | 2.13        | 7   | 73007022   | 73195272  | 110738                  | in gene                            | 6.00     |
| 1428705_at   | NM_027040                                  | 1700007K13Rik | RIKEN cDNA 1700007K13 gene                                                          | 2.13        | 2   | 28317521   | 28321844  | -1980                   | upstream                           | 5.00     |
| 1416939_at   | NM_026438                                  | Ppa1          | pyrophosphatase (inorganic) 1                                                       | 2.12        | 10  | 61111369   | 61136913  | 11031                   | in gene                            | 5.00     |
| 1421341_at   | NM_015732                                  | Axin2         | axin2                                                                               | 2.11        | 11  | 108781680  | 108812097 | 776                     | in gene                            | 5.00     |
| 1438789_s_at | NM_009468                                  | Dpys3         | diflydroxyrimidinease-like 3                                                        | 2.10        | 18  | 43483936   | 43552985  | -1415                   | upstream                           | 6.00     |
| 1435653_at   | NM_018811                                  | Abhd2         | abhydrolase domain containing 2                                                     | 2.06        | 7   | 86418152   | 86506487  | 243112                  | in gene, in gene                   | 6.50     |

| Probe Set    | Accession No.                                                                                                                           | Symbol        | Gene Title                                                                     | Fold Change | Chr | Gene Start | Gene End  | Interval Dists to Start | Interval Pos                    | Avg Peak |
|--------------|-----------------------------------------------------------------------------------------------------------------------------------------|---------------|--------------------------------------------------------------------------------|-------------|-----|------------|-----------|-------------------------|---------------------------------|----------|
| 1440446_at   | NM_027280                                                                                                                               | Nkd1          | naked cuticle 1 homolog (Drosophila)                                           | 2.05        | 8   | 91045269   | 91116225  | 1.69393E+19             | in gene, in gene, in gene       | 8.00     |
| 1435699_at   | NM_178726                                                                                                                               | Ppm1l         | protein phosphatase 1 (formerly 2C)-like                                       | 2.05        | 3   | 69120840   | 69359326  | 22792                   | in gene                         | 6.00     |
| 1455466_at   | NM_001081342                                                                                                                            | Gpr133        | G protein-coupled receptor 133                                                 | 2.03        | 5   | 129602625  | 129710474 | 110191                  | downstream                      | 6.00     |
| 1450782_at   | NM_009523                                                                                                                               | Wnt4          | wingless-related MMTV integration site 4                                       | 2.03        | 4   | 136833550  | 136852694 | 35709056                | in gene, in gene                | 4.50     |
| 1435787_at   | NM_178726                                                                                                                               | Ppm1l         | protein phosphatase 1 (formerly 2C)-like                                       | 2.02        | 3   | 69120840   | 69359326  | 22792                   | in gene                         | 6.00     |
| 1417937_at   | NM_021532                                                                                                                               | Dact1         | dapper homolog 1, antagonist of beta-catenin (xenopus)                         | 2.02        | 12  | 72410971   | 72419881  | -171                    | upstream                        | 5.00     |
| 1448029_at   | NM_011535, NM_198052                                                                                                                    | Tbx3          | T-box 3                                                                        | 2.01        | 5   | 120120678  | 120134610 | -1382902122             | upstream, upstream, in gene     | 6.00     |
| 1438329_at   | NM_205823                                                                                                                               | Tlr12         | tol-like receptor 12                                                           | 1.98        | 4   | 128292891  | 128295733 | 8373139                 | downstream, upstream            | 5.50     |
| 1456545_at   | NM_010553                                                                                                                               | Il18rap       | interleukin 18 receptor accessory protein                                      | 1.96        | 1   | 40572208   | 40606150  | 20165                   | in gene                         | 5.00     |
| 1452977_at   | NM_177263                                                                                                                               | Zfx3          | zinc fingers and homeobox 3                                                    | 1.96        | 2   | 160596183  | 160698726 | -9482                   | upstream                        | 4.00     |
| 1424790_at   | NM_001007570                                                                                                                            | Slc25a42      | solute carrier family 25, member 42                                            | 1.95        | 8   | 72708239   | 72736155  | 20299101                | in gene, upstream               | 6.00     |
| 1415945_at   | NM_008566                                                                                                                               | Mcm5          | minichromosome maintenance deficient 5, cell division cycle 46 (S. cerevisiae) | 1.93        | 8   | 77633427   | 77652338  | 15181                   | in gene                         | 5.00     |
| 1451899_a_at | NM_001081462, NM_001081463, NM_001081464, NM_001081465, NM_001081466, NM_001081467, NM_001081468, NM_001081469, NM_001081470, NM_020331 | Gtf2ird1      | general transcription factor II I repeat domain-containing 1                   | 1.93        | 5   | 134833531  | 134932581 | 68997                   | in gene                         | 7.00     |
| 1424089_a_at | NM_013685                                                                                                                               | Tcf4          | transcription factor 4                                                         | 1.92        | 18  | 69504175   | 69843998  | 317841                  | in gene                         | 6.00     |
| 1450650_at   | NM_019472                                                                                                                               | Myo10         | myosin X                                                                       | 1.92        | 15  | 25552305   | 25743426  | 55583161823             | in gene, in gene                | 5.00     |
| 1424767_at   | NM_174988                                                                                                                               | Cdh22         | cadherin 22                                                                    | 1.92        | 2   | 164937009  | 165060219 | 2011                    | in gene                         | 6.00     |
| 1437393_at   | NM_011101                                                                                                                               | Prkca         | protein kinase C, alpha                                                        | 1.91        | 11  | 107799562  | 108205242 | 7215418938              | in gene, in gene                | 6.00     |
| 1425310_a_at | NM_024474                                                                                                                               | Emid2         | EMI domain containing 2                                                        | 1.90        | 5   | 137217634  | 137358977 | 7243328513              | in gene, in gene                | 6.00     |
| 1429549_at   | NM_025685                                                                                                                               | Col27a1       | collagen, type XXVII, alpha 1                                                  | 1.89        | 4   | 62876446   | 62996025  | 32770                   | in gene                         | 6.00     |
| 1440911_at   | NM_153393                                                                                                                               | Col23a1       | collagen, type XXIII, alpha 1                                                  | 1.89        | 11  | 51103422   | 51394612  | 1.3293E+11              | in gene, in gene                | 6.50     |
| 1433971_at   | NM_001081557                                                                                                                            | Camta1        | calmodulin binding transcription activator 1                                   | 1.88        | 4   | 150433635  | 151235855 | 5.71599E+23             | in gene, in gene, in gene       | 7.00     |
| 1455609_at   | NM_007708                                                                                                                               | Cit           | citron                                                                         | 1.88        | 5   | 116295665  | 116456352 | 13007169039             | in gene, downstream             | 5.50     |
| 1416724_x_at | NM_013685                                                                                                                               | Tcf4          | transcription factor 4                                                         | 1.88        | 18  | 69504175   | 69843998  | 317841                  | in gene                         | 6.00     |
| 1448052_at   | NM_026599                                                                                                                               | Cgn1          | cingulin-like 1                                                                | 1.87        | 9   | 71474316   | 71619409  | 1.24337E+21             | in gene, in gene, in gene       | 6.75     |
| 1431704_a_at | NM_023884                                                                                                                               | Ralgps2       | Ral GEF with PH domain and SH3 binding motif 2                                 | 1.86        | 1   | 158738253  | 158869711 | 751                     | in gene                         | 5.00     |
| 1426955_at   | NM_009929                                                                                                                               | Col18a1       | collagen, type XVIII, alpha 1                                                  | 1.86        | 10  | 76514924   | 76629246  | 343024478               | in gene, in gene                | 8.00     |
| 1424711_at   | NM_001033759, NM_031997                                                                                                                 | Tmem2         | transmembrane protein 2                                                        | 1.84        | 19  | 21852832   | 21932817  | 52256                   | in gene                         | 5.00     |
| 1442021_at   | NM_010307, NM_177137                                                                                                                    | Gnal          | guanine nucleotide binding protein, alpha stimulating, olfactory type          | 1.83        | 18  | 67247990   | 67386446  | 116906                  | in gene                         | 8.00     |
| 1456640_at   | NM_172966                                                                                                                               | Sh3rf2        | SH3 domain containing ring finger 2                                            | 1.83        | 18  | 42213364   | 42318105  | 1404                    | in gene                         | 5.00     |
| 1415877_at   | NM_009468                                                                                                                               | Dpysl3        | dihydropyrimidinase-like 3                                                     | 1.82        | 18  | 43483936   | 43552985  | -1415                   | upstream                        | 6.00     |
| 1419724_at   | NM_010100                                                                                                                               | Edar          | ectodysplasin-A receptor                                                       | 1.81        | 10  | 58063537   | 58138444  | 3884                    | in gene                         | 7.00     |
| 1431335_a_at | NM_023395                                                                                                                               | Wfdc1         | WAP four-disulfide core domain 1                                               | 1.80        | 8   | 122190265  | 122211920 | 31063                   | downstream                      | 6.00     |
| 1423250_a_at | NM_009367                                                                                                                               | Tgfb2         | transforming growth factor, beta 2                                             | 1.79        | 1   | 188447521  | 188529868 | -2580                   | upstream                        | 6.00     |
| 1417040_a_at | NM_016778                                                                                                                               | Bok           | BCL2-related ovarian killer protein                                            | 1.78        | 1   | 95582271   | 95592339  | 1.21712E+13             | in gene, downstream, downstream | 6.67     |
| 1429210_at   | NM_153393                                                                                                                               | Col23a1       | collagen, type XXIII, alpha 1                                                  | 1.77        | 11  | 51103422   | 51394612  | 1.3293E+11              | in gene, in gene                | 6.50     |
| 1418190_at   | NM_011134                                                                                                                               | Pon1          | paraoxonase 1                                                                  | 1.77        | 6   | 5118105    | 5143824   | 4208                    | in gene                         | 5.00     |
| 1422912_at   | NM_007554                                                                                                                               | Bmp4          | bone morphogenetic protein 4                                                   | 1.73        | 14  | 47003195   | 47010274  | 3682                    | in gene                         | 8.00     |
| 1429214_at   | NM_029981                                                                                                                               | Adamsl2       | ADAMTS-like 2                                                                  | 1.73        | 2   | 26934901   | 26964133  | 13723                   | in gene                         | 5.00     |
| 1440275_at   | NM_019732                                                                                                                               | Runx3         | runt related transcription factor 3                                            | 1.73        | 4   | 134676560  | 134733905 | 43675                   | in gene                         | 6.00     |
| 1456812_at   | NM_011994                                                                                                                               | Abcd2         | ATP-binding cassette, sub-family D (ALD), member 2                             | 1.73        | 15  | 90976302   | 91022238  | 1550                    | in gene                         | 6.00     |
| 1427980_at   | XM_001004724, XM_924798                                                                                                                 | 4933407C03Rik | RIKEN cDNA 4933407C03 gene                                                     | 1.72        | 8   | 119780993  | 119985406 | 7.54551E+16             | in gene, in gene, in gene       | 6.00     |
| 1418331_at   | NM_025402                                                                                                                               | 1110031102Rik | RIKEN cDNA 1110031102 gene                                                     | 1.72        | 11  | 121038907  | 121065962 | 5210                    | in gene                         | 7.00     |
| 1440564_at   | NM_144944                                                                                                                               | Prokr2        | prokineticin receptor 2                                                        | 1.71        | 2   | 132196901  | 132211136 | -48                     | upstream                        | 8.00     |
| 1454969_at   | NM_177139                                                                                                                               | Lypd6         | LY6/PLAUR domain containing 6                                                  | 1.71        | 2   | 49983890   | 50049084  | -7986                   | upstream                        | 6.00     |
| 1436808_x_at | NM_008566                                                                                                                               | Mcm5          | minichromosome maintenance deficient 5, cell division cycle 46 (S. cerevisiae) | 1.71        | 8   | 77633427   | 77652338  | 15181                   | in gene                         | 5.00     |
| 1418260_at   | NM_015755                                                                                                                               | Hunk          | horizontally upregulated Neu-associated kinase                                 | 1.70        | 16  | 90386642   | 90499798  | 38574                   | in gene                         | 6.00     |
| 1452118_at   | NM_028244                                                                                                                               | Rrp1b         | ribosomal RNA processing 1 homolog B (S. cerevisiae)                           | 1.70        | 17  | 32173107   | 32197550  | 26765                   | downstream                      | 8.00     |
| 1435021_at   | NM_001038701, NM_008071                                                                                                                 | Gabbr3        | gamma-aminobutyric acid (GABA) A receptor, subunit beta 3                      | 1.70        | 7   | 64845904   | 65084172  | 592                     | in gene                         | 6.00     |
| 1430779_at   | NM_030699                                                                                                                               | Ntng1         | netrin G1                                                                      | 1.70        | 3   | 109584024  | 109946146 | 264130                  | in gene                         | 5.00     |
| 1448346_at   | NM_007687                                                                                                                               | Cfl1          | cofilin 1, non-muscle                                                          | 1.70        | 19  | 5490525    | 5495201   | -1437                   | upstream                        | 7.00     |
| 1437479_x_at | NM_011535, NM_198052                                                                                                                    | Tbx3          | T-box 3                                                                        | 1.70        | 5   | 120120678  | 120134610 | -1382902122             | upstream, upstream, in gene     | 6.00     |
| 1422699_at   | NM_007440                                                                                                                               | Alox12        | arachidonate 12-lipoxygenase                                                   | 1.69        | 11  | 70054957   | 70068843  | 747                     | in gene                         | 5.00     |
| 1422607_at   | NM_007960                                                                                                                               | Etv1          | ets variant gene 1                                                             | 1.69        | 12  | 39506897   | 39594790  | -1569                   | upstream                        | 6.00     |
| 1416723_at   | NM_013685                                                                                                                               | Tcf4          | transcription factor 4                                                         | 1.69        | 18  | 69504175   | 69843998  | 317841                  | in gene                         | 6.00     |
| 1430533_a_at | NM_007614                                                                                                                               | Ctnnb1        | catenin (cadherin associated protein), beta 1                                  | 1.68        | 9   | 120842593  | 120869625 | -4919679                | upstream, in gene               | 7.00     |
| 1418237_s_at | NM_009929                                                                                                                               | Col18a1       | collagen, type XVIII, alpha 1                                                  | 1.67        | 10  | 76514924   | 76629246  | 343024478               | in gene, in gene                | 8.00     |
| 1434320_at   | NM_172977                                                                                                                               | Gtf3c4        | general transcription factor IIIC, polypeptide 4                               | 1.67        | 2   | 28681095   | 28695806  | 3582                    | in gene                         | 6.00     |
| 1449089_at   | NM_173440                                                                                                                               | Nrip1         | nuclear receptor interacting protein 1                                         | 1.67        | 16  | 76291107   | 76373294  | 58654                   | in gene                         | 6.00     |
| 1459838_s_at | NM_001017525, NM_028709                                                                                                                 | Btbd11        | BTB (POZ) domain containing 11                                                 | 1.67        | 10  | 84850564   | 85123037  | 6.17561E+16             | in gene, in gene, in gene       | 5.33     |
| 1417695_a_at | NM_009230                                                                                                                               | Soat1         | sterol O-acyltransferase 1                                                     | 1.66        | 1   | 158358239  | 158404459 | -117                    | upstream                        | 5.00     |
| 1434149_at   | NM_013685                                                                                                                               | Tcf4          | transcription factor 4                                                         | 1.65        | 18  | 69504175   | 69843998  | 317841                  | in gene                         | 6.00     |
| 1423499_at   | NM_026408                                                                                                                               | Sncap         | synuclein, alpha interacting protein (synphilin)                               | 1.65        | 18  | 52927363   | 53075584  | 38621                   | in gene                         | 6.00     |
| 1428792_at   | NM_029815                                                                                                                               | Bcas1         | breast carcinoma amplified sequence 1                                          | 1.65        | 2   | 170172648  | 170253328 | 26224                   | in gene                         | 4.00     |
| 1454295_at   | NM_173440                                                                                                                               | Nrip1         | nuclear receptor interacting protein 1                                         | 1.64        | 16  | 76291107   | 76373294  | 58654                   | in gene                         | 6.00     |
| 1451344_at   | NM_146162                                                                                                                               | Tmem119       | transmembrane protein 119                                                      | 1.64        | 5   | 114243738  | 114250367 | -65                     | upstream                        | 7.00     |
| 1450922_a_at | NM_009367                                                                                                                               | Tgfb2         | transforming growth factor, beta 2                                             | 1.64        | 1   | 188447521  | 188529868 | -2580                   | upstream                        | 6.00     |
| 1443870_at   | NM_001033336                                                                                                                            | Abcc4         | ATP-binding cassette, sub-family C (CFTR/MRP), member 4                        | 1.64        | 14  | 118881914  | 119105427 | 11635                   | in gene                         | 7.00     |
| 1436528_at   | NM_178929                                                                                                                               | Kazal1        | Kazal-type serine peptidase inhibitor domain 1                                 | 1.64        | 19  | 45150629   | 45153772  | -1114                   | upstream                        | 5.00     |
| 1458512_at   | NM_009389                                                                                                                               | Tle3          | transducin-like enhancer of split 3, homolog of Drosophila E(sp1)              | 1.63        | 9   | 61221479   | 61264791  | 569                     | in gene                         | 6.00     |
| 1419300_at   | NM_010228                                                                                                                               | Flt1          | FMS-like tyrosine kinase 1                                                     | 1.63        | 5   | 148373772  | 148537564 | 160364                  | in gene                         | 6.00     |
| 1448443_at   | NM_009250                                                                                                                               | Serpini1      | serine (or cysteine) peptidase inhibitor, clade 1, member 1                    | 1.63        | 3   | 75361495   | 75446276  | 73049                   | in gene                         | 7.00     |
| 1456117_at   | NM_028244                                                                                                                               | Rrp1b         | ribosomal RNA processing 1 homolog B (S. cerevisiae)                           | 1.63        | 17  | 32173107   | 32197550  | 26765                   | downstream                      | 8.00     |
| 1455785_at   | NM_010595                                                                                                                               | Kcna1         | potassium voltage-gated channel, shaker-related subfamily, member 1            | 1.62        | 6   | 126586481  | 126595819 | -1541                   | upstream                        | 5.00     |
| 1438431_at   | NM_011994                                                                                                                               | Abcd2         | ATP-binding cassette, sub-family D (ALD), member 2                             | 1.62        | 15  | 90976302   | 91022238  | 1550                    | in gene                         | 6.00     |

| Probe Set    | Accession No.                                       | Symbol        | Gene Title                                                                                                    | Fold Change | Chr | Gene Start | Gene End  | Interval Dists to Start | Interval Pos               | Avg Peak |
|--------------|-----------------------------------------------------|---------------|---------------------------------------------------------------------------------------------------------------|-------------|-----|------------|-----------|-------------------------|----------------------------|----------|
| 1424471_at   | NM_144850                                           | Rapgef3       | Rap guanine nucleotide exchange factor (GEF) 3                                                                | 1.62        | 15  | 97575384   | 97598103  | 20695                   | in gene                    | 5.00     |
| 1434856_at   | NM_001081433                                        | Ankrd44       | ankyrin repeat domain 44                                                                                      | 1.62        | 1   | 54702184   | 54983202  | 171618                  | in gene                    | 7.00     |
| 1432176_a_at | NM_007932                                           | Eng           | endoglin                                                                                                      | 1.61        | 2   | 32502115   | 32537638  | 3339389                 | in gene, in gene           | 6.50     |
| 1449991_at   | NM_018729                                           | Cd244         | CD244 natural killer cell receptor 2B4                                                                        | 1.60        | 1   | 173489324  | 173515447 | -364                    | upstream                   | 5.00     |
| 1451117_a_at | NM_028011                                           | Tom1l1        | target of myb1-like 1 (chicken)                                                                               | 1.60        | 11  | 90507005   | 90548915  | 23619                   | in gene                    | 6.00     |
| 1426805_at   | NM_011417                                           | Smarca4       | SWI/SNF related, matrix associated, actin dependent regulator of chromatin, subfamily a, member 4             | 1.60        | 9   | 21420613   | 21507811  | 59                      | in gene                    | 6.00     |
| 1454930_at   | NM_173038                                           | Tbce1         | tubulin folding cofactor E-like                                                                               | 1.59        | 9   | 42220400   | 42280309  | 13941                   | in gene                    | 6.00     |
| 1453191_at   | NM_025685                                           | Col27a1       | collagen, type XXVII, alpha 1                                                                                 | 1.59        | 4   | 62876446   | 62996025  | 32770                   | in gene                    | 6.00     |
| 1449559_at   | NM_013601                                           | Msx2          | homeobox, msh-like 2                                                                                          | 1.58        | 13  | 53562250   | 53568149  | 5333                    | in gene                    | 6.00     |
| 1449586_at   | NM_019645                                           | Pkp1          | plakophilin 1                                                                                                 | 1.58        | 1   | 137767922  | 137815601 | 56913                   | downstream                 | 5.00     |
| 1416702_at   | NM_009250                                           | Serpini1      | serine (or cysteine) peptidase inhibitor, clade 1, member 1                                                   | 1.58        | 3   | 75361495   | 75446276  | 73049                   | in gene                    | 7.00     |
| 1422631_at   | NM_013464                                           | Ahr           | aryl-hydrocarbon receptor                                                                                     | 1.57        | 12  | 36182651   | 36219661  | -19                     | upstream                   | 7.00     |
| 1453015_at   | XM_001004724, XM_924798                             | 4933407C03Rik | RIKEN cDNA 4933407C03 gene                                                                                    | 1.57        | 8   | 119780993  | 119985406 | 7.54551E+16             | in gene, in gene, in gene  | 6.00     |
| 1450106_a_at | NM_007965                                           | Evl           | Ena-vasodilator stimulated phosphoprotein                                                                     | 1.57        | 12  | 109792930  | 109926726 | -7714                   | upstream                   | 6.00     |
| 1460330_at   | NM_013470                                           | Anxa3         | annexin A3                                                                                                    | 1.56        | 5   | 97222434   | 97274987  | 1228612670              | in gene, in gene           | 4.50     |
| 1452317_at   | NM_008270                                           | Hoxb9         | homeobox B9                                                                                                   | 1.56        | 11  | 96132644   | 96137909  | 764                     | in gene                    | 5.00     |
| 1437445_at   | NM_001039104, NM_018752                             | Trpm1         | transient receptor potential cation channel, subfamily M, member 1                                            | 1.55        | 7   | 71298814   | 71414658  | 55938                   | in gene                    | 7.00     |
| 1455689_at   | NM_175284                                           | Fzd10         | frizzled homolog 10 (Drosophila)                                                                              | 1.55        | 5   | 129109981  | 129109988 | -2661                   | upstream                   | 5.00     |
| 1418061_at   | NM_013589                                           | Ltbp2         | latent transforming growth factor beta binding protein 2                                                      | 1.54        | 12  | 86124162   | 86217445  | 68949                   | in gene                    | 5.00     |
| 1453084_s_at | XM_907370, XM_981889                                | Col22a1       | collagen, type XXII, alpha 1                                                                                  | 1.54        | 15  | 71628906   | 71864639  | 239                     | in gene                    | 5.00     |
| 1444242_at   | NM_033314                                           | Sloc2a1       | Solute carrier organic anion transporter family, member 2a1                                                   | 1.54        | 9   | 102910819  | 102990179 | 70125                   | in gene                    | 6.00     |
| 1423563_at   | NM_030890                                           | Prrt1         | proline-rich transmembrane protein 1                                                                          | 1.54        | 17  | 34766631   | 34769205  | -20232793               | upstream, downstream       | 6.50     |
| 1434263_at   | NM_028657                                           | F630110N24Rik | RIKEN cDNA F630110N24 gene                                                                                    | 1.54        | 10  | 80820236   | 80828967  | -55007332               | upstream, in gene          | 5.50     |
| 1437012_x_at | NM_144850                                           | Rapgef3       | Rap guanine nucleotide exchange factor (GEF) 3                                                                | 1.54        | 15  | 97575384   | 97598103  | 20695                   | in gene                    | 5.00     |
| 1418469_at   | NM_173440                                           | Nrip1         | nuclear receptor interacting protein 1                                                                        | 1.54        | 16  | 76291107   | 76373294  | 58654                   | in gene                    | 6.00     |
| 1428354_at   | NM_001080932                                        | Foxk2         | forkhead box K2                                                                                               | 1.54        | 11  | 121116808  | 121171210 | 4248                    | in gene                    | 7.00     |
| 1438133_a_at | NM_010516                                           | Cyr61         | cysteine rich protein 61                                                                                      | 1.53        | 3   | 145309940  | 145312945 | 2241                    | in gene                    | 6.00     |
| 1420401_a_at | NM_019511                                           | Ramp3         | receptor (calcitonin) activity modifying protein 3                                                            | 1.53        | 11  | 6558536    | 6577478   | 2232                    | in gene                    | 5.00     |
| 1450945_at   | NM_011101                                           | Prkca         | protein kinase C, alpha                                                                                       | 1.53        | 11  | 107799562  | 108205242 | 7215418938              | in gene, in gene           | 6.00     |
| 1424755_at   | NM_146001                                           | Hip1          | huntingtin interacting protein 1                                                                              | 1.52        | 5   | 135883896  | 136020985 | 5554547001              | in gene, in gene           | 7.00     |
| 1422544_at   | NM_019472                                           | Myo10         | myosin X                                                                                                      | 1.52        | 15  | 25552305   | 25743426  | 55583161823             | in gene, in gene           | 5.00     |
| 1417696_at   | NM_009230                                           | Soat1         | sterol O-acyltransferase 1                                                                                    | 1.52        | 1   | 158358239  | 158404459 | -117                    | upstream                   | 5.00     |
| 1422466_at   | NM_008750                                           | Nxn           | nucleoredoxin                                                                                                 | 1.52        | 11  | 76070738   | 76212626  | 136191                  | in gene                    | 4.00     |
| 1435908_at   | NM_020253                                           | Nrxn2         | neurxin II                                                                                                    | 1.52        | 19  | 6428016    | 6533217   | 81872                   | in gene                    | 5.00     |
| 1437695_at   | NM_144944                                           | Prokr2        | prokineticin receptor 2                                                                                       | 1.51        | 2   | 132196901  | 132211136 | -48                     | upstream                   | 8.00     |
| 1455951_at   | NM_001003913                                        | Mars          | methionine-tRNA synthetase                                                                                    | 1.50        | 10  | 126733282  | 126748695 | 21015                   | downstream                 | 7.00     |
| 1421158_at   | NM_026599                                           | Cgln1         | cingulin-like 1                                                                                               | 1.50        | 9   | 71474316   | 71619409  | 1.24337E+21             | in gene, in gene, in gene  | 6.75     |
| 1450923_at   | NM_009367                                           | Tgfb2         | transforming growth factor, beta 2                                                                            | 1.50        | 1   | 188447521  | 188529868 | -2580                   | upstream                   | 6.00     |
| 1452232_at   | NM_144731                                           | Galnt7        | UDP-N-acetyl-alpha-D-galactosamine: polypeptide N-acetylglucosaminyltransferase 7                             | -1.52       | 8   | 60003366   | 60131800  | 6834                    | in gene                    | 4.00     |
| 1415975_at   | NM_025821                                           | Carhsp1       | calcium regulated heat stable protein 1                                                                       | -1.52       | 16  | 8658680    | 8672246   | 1814                    | in gene                    | 8.00     |
| 1419133_at   | NM_025276                                           | Evp1          | envoplakin                                                                                                    | -1.52       | 11  | 116081873  | 116099415 | 165575299               | in gene, upstream          | 5.00     |
| 1417169_at   | NM_016808, NM_198091, NM_198092                     | Usp2          | ubiquitin specific peptidase 2                                                                                | -1.52       | 9   | 43875104   | 43903710  | -6.41222E+14            | upstream, in gene, in gene | 6.00     |
| 1448694_at   | NM_010591                                           | Jun           | Jun oncogene                                                                                                  | -1.52       | 4   | 94715746   | 94718878  | -482                    | upstream                   | 8.00     |
| 1438560_x_at | NM_009837                                           | Cct4          | chaperonin containing Tcp1, subunit 4 (delta)                                                                 | -1.52       | 11  | 22890593   | 22903336  | 84                      | in gene                    | 6.00     |
| 1428643_at   | NM_145128                                           | Mgat5         | mannoside acetylglucosaminyltransferase 5                                                                     | -1.52       | 1   | 129101563  | 129379549 | 22960                   | in gene                    | 6.00     |
| 1439962_at   | XM_896611, XM_922997                                | 2310010J17Rik | RIKEN cDNA 2310010J17 gene                                                                                    | -1.53       | 7   | 97273368   | 97278775  | 599                     | in gene                    | 6.00     |
| 1418259_a_at | NM_009849                                           | Entpd2        | ectonucleoside triphosphate diphosphohydrolase 2                                                              | -1.53       | 2   | 25251478   | 25256838  | 234                     | in gene                    | 6.00     |
| 1417409_at   | NM_010591                                           | Jun           | Jun oncogene                                                                                                  | -1.53       | 4   | 94715746   | 94718878  | -482                    | upstream                   | 8.00     |
| 1435549_at   | NM_175130                                           | Trpm4         | transient receptor potential cation channel, subfamily M, member 4                                            | -1.53       | 7   | 52558002   | 52589112  | 33581                   | downstream                 | 4.00     |
| 1417933_at   | NM_008344                                           | Igfbp6        | insulin-like growth factor binding protein 6                                                                  | -1.54       | 15  | 101974793  | 101979943 | 6759                    | downstream                 | 6.00     |
| 1433782_at   | NM_022890                                           | Cldn12        | claudin 12                                                                                                    | -1.54       | 5   | 5505109    | 5514873   | 366                     | in gene                    | 6.00     |
| 1437217_at   | NM_001012450, NM_001012451, NM_080471               | Ankrd6        | ankyrin repeat domain 6                                                                                       | -1.54       | 4   | 32891010   | 33037801  | 12274586169             | in gene, in gene           | 6.00     |
| 1425553_s_at | NM_145070                                           | Hip1r         | huntingtin interacting protein 1 related                                                                      | -1.54       | 5   | 124423648  | 124453209 | 2668829376              | in gene, in gene           | 7.00     |
| 1435261_at   | NM_198967                                           | Tmct1         | transmembrane and tetratricopeptide repeat containing 1                                                       | -1.54       | 6   | 148185194  | 148392874 | 196085                  | in gene                    | 5.00     |
| 1424052_at   | NM_025920                                           | Thap4         | THAP domain containing 4                                                                                      | -1.54       | 1   | 95601968   | 95651415  | 5725549911              | downstream, downstream     | 7.00     |
| 1451431_a_at | NM_001048227, NM_001048228, NM_001048229, NM_026797 | Dynd2         | dysbindin (dystrobrebin binding protein 1) domain containing 2                                                | -1.55       | 2   | 164311640  | 164318823 | 11368                   | downstream                 | 6.00     |
| 1434963_at   | NM_178652                                           | Supt3h        | suppressor of Ty 3 homolog (S. cerevisiae)                                                                    | -1.55       | 17  | 44914120   | 45256233  | -232                    | upstream                   | 5.00     |
| 1420640_at   | NM_021310                                           | Jmy           | junction-mediating and regulatory protein                                                                     | -1.56       | 13  | 94204157   | 94269644  | 172                     | in gene                    | 7.00     |
| 1423891_at   | NM_133994                                           | Gstt3         | glutathione S-transferase, theta 3                                                                            | -1.56       | 10  | 75238867   | 75244159  | 7791                    | downstream                 | 6.00     |
| 1424468_s_at | NM_153537                                           | Phldb1        | pleckstrin homology-like domain, family B, member 1                                                           | -1.56       | 9   | 44494391   | 44543277  | -2131                   | upstream                   | 8.00     |
| 1423717_at   | NM_021299                                           | Ak3           | adenylate kinase 3                                                                                            | -1.56       | 19  | 29095322   | 29122392  | -5267                   | upstream                   | 5.00     |
| 1424467_at   | NM_153537                                           | Phldb1        | pleckstrin homology-like domain, family B, member 1                                                           | -1.57       | 9   | 44494391   | 44543277  | -2131                   | upstream                   | 8.00     |
| 1419457_at   | NM_012026                                           | Rgnef         | Rho-guanine nucleotide exchange factor                                                                        | -1.58       | 13  | 98668550   | 98976120  | 190104                  | in gene                    | 6.00     |
| 1418294_at   | XM_001476161, XM_001476174, XM_980440               | Epb4.14b      | erythrocyte protein band 4.1-like 4b                                                                          | -1.58       | 4   | 57008606   | 57156520  | 132856                  | in gene                    | 5.00     |
| 1417516_at   | NM_007837                                           | Ddit3         | DNA-damage inducible transcript 3                                                                             | -1.59       | 10  | 126727866  | 126733342 | -186                    | upstream                   | 7.00     |
| 1460634_at   | NM_009058                                           | Ralgds        | ral guanine nucleotide dissociation stimulator                                                                | -1.59       | 2   | 28368851   | 28408590  | 1250438685              | in gene, in gene           | 6.50     |
| 1419442_at   | NM_016762                                           | Matn2         | matrilin 2                                                                                                    | -1.60       | 15  | 34236436   | 34365997  | 193                     | in gene                    | 5.00     |
| 1452195_s_at | NM_030207                                           | Sfi1          | Sfi1 homolog, spindle assembly associated (yeast)                                                             | -1.61       | 11  | 3031853    | 3093466   | 69626                   | downstream                 | 13.00    |
| 1450063_at   | NM_019445                                           | Fmn2          | formin 2                                                                                                      | -1.61       | 1   | 176419303  | 176752208 | 35673                   | in gene                    | 7.00     |
| 1417168_a_at | NM_016808, NM_198091, NM_198092                     | Usp2          | ubiquitin specific peptidase 2                                                                                | -1.61       | 9   | 43875104   | 43903710  | -6.41222E+14            | upstream, in gene, in gene | 6.00     |
| 1424919_at   | NM_001003817                                        | ErbB2         | v-erb-b2 erythroblastic leukemia viral oncogene homolog 2, neuroglioblastoma derived oncogene homolog (avian) | -1.61       | 11  | 98273798   | 98299030  | 22442                   | in gene                    | 5.00     |
| 1428074_at   | NM_001002267                                        | Tmem158       | transmembrane protein 158                                                                                     | -1.62       | 9   | 123168175  | 123169907 | 8275                    | downstream                 | 6.00     |
| 1422747_at   | NM_016681                                           | Chek2         | CHK2 checkpoint homolog (S. pombe)                                                                            | -1.62       | 5   | 111269036  | 111303152 | 29588                   | in gene                    | 10.00    |
| 1437449_at   | NM_001013381                                        | Rsad1         | radical S-adenosyl methionine domain containing 1                                                             | -1.63       | 11  | 94401112   | 94410513  | -15                     | upstream                   | 6.00     |
| 1456559_at   | NR_002863                                           | Emx2os        | empty spiracles homolog 2 (Drosophila) opposite strand                                                        | -1.64       | 19  | 59499594   | 59533125  | 22517                   | in gene                    | 7.00     |
| 1455096_at   | NM_201518                                           | Flrt2         | fibronectin leucine rich transmembrane protein 2                                                              | -1.65       | 12  | 96930464   | 97019235  | 2816                    | in gene                    | 6.00     |
| 1429727_at   | NM_025807                                           | Slc16a9       | solute carrier family 16 (monocarboxylic acid transporters), member 9                                         | -1.65       | 10  | 69708024   | 69748699  | 14056                   | in gene                    | 7.00     |



| Probe Set    | Accession No.                                                              | Symbol        | Gene Title                                                                             | Fold Change | Chr | Gene Start | Gene End  | Interval Dists to Start | Interval Pos            | Avg Peak |
|--------------|----------------------------------------------------------------------------|---------------|----------------------------------------------------------------------------------------|-------------|-----|------------|-----------|-------------------------|-------------------------|----------|
| 1419056_at   | NM_001025364,<br>NM_013648                                                 | Rtn2          | reticulon 2 (Z-band associated protein)                                                | -1.66       | 7   | 19868016   | 19881509  | 13360                   | in gene                 | 6.00     |
| 1423284_at   | NM_026345                                                                  | Mansc1        | MANSO domain containing 1                                                              | -1.66       | 6   | 134559228  | 134582506 | -8806                   | upstream                | 4.00     |
| 1437594_x_at | NM_133779                                                                  | Pigt          | phosphatidylinositol glycan anchor biosynthesis, class T                               | -1.66       | 2   | 164323025  | 164333801 | -17                     | upstream                | 6.00     |
| 1417848_at   | NM_133218                                                                  | Zfp704        | zinc finger protein 704                                                                | -1.67       | 3   | 9427023    | 9610085   | 85429                   | in gene                 | 6.00     |
| 1425396_a_at | NM_010693                                                                  | Lck           | lymphocyte protein tyrosine kinase                                                     | -1.67       | 4   | 129225602  | 129235616 | -10048                  | upstream                | 5.00     |
| 1423718_at   | NM_021299                                                                  | Ak3           | adenylate kinase 3                                                                     | -1.68       | 19  | 29095322   | 29122392  | -5267                   | upstream                | 5.00     |
| 1426383_at   | NM_009963                                                                  | Cry2          | cryptochrome 2 (photolyase-like)                                                       | -1.68       | 2   | 92243803   | 92274185  | 10089                   | in gene                 | 7.00     |
| 1426937_at   | NM_027519                                                                  | 6330406115Rik | RIKEN cDNA 6330406115 gene                                                             | -1.69       | 5   | 150214381  | 150234278 | 16675                   | in gene                 | 5.00     |
| 1426606_at   | NM_145123                                                                  | Crtac1        | cartilage acidic protein 1                                                             | -1.69       | 19  | 42357527   | 42506273  | 133153                  | in gene                 | 5.00     |
| 1439428_x_at | NM_146041                                                                  | Gm5s          | GDP-mannose 4, 6-dehydratase                                                           | -1.70       | 13  | 31911455   | 32430413  | 69357                   | in gene                 | 6.00     |
| 1448530_at   | NM_025508                                                                  | Gmpr          | guanosine monophosphate reductase                                                      | -1.71       | 13  | 45602838   | 45641750  | 15914                   | in gene                 | 7.00     |
| 1453498_x_at | NM_133186                                                                  | Steap3        | STEAP family member 3                                                                  | -1.71       | 1   | 122123783  | 122161834 | 3322616778              | in gene, in gene        | 7.00     |
| 1449510_at   | NM_020589                                                                  | Zfp467        | zinc finger protein 467                                                                | -1.71       | 6   | 48387585   | 48395606  | 1590                    | in gene                 | 5.00     |
| 1437784_at   | NM_009822                                                                  | Runx1t1       | runx-related transcription factor 1; translocated to, 1 (cyclin D-related)             | -1.71       | 4   | 13711929   | 13818264  | 48295                   | in gene                 | 6.00     |
| 1420349_at   | NM_008966                                                                  | Ptgr          | prostaglandin F receptor                                                               | -1.73       | 3   | 151461574  | 151500492 | -7444                   | upstream                | 5.00     |
| 1443260_at   | NM_010789                                                                  | Meis1         | Meis homeobox 1                                                                        | -1.74       | 11  | 18780431   | 18918683  | 482591877               | in gene, upstream       | 8.00     |
| 1448785_at   | NM_009822                                                                  | Runx1t1       | runx-related transcription factor 1; translocated to, 1 (cyclin D-related)             | -1.75       | 4   | 13711929   | 13818264  | 48295                   | in gene                 | 6.00     |
| 1425016_at   | NM_010142                                                                  | Ephb2         | Eph receptor B2                                                                        | -1.75       | 4   | 136209523  | 136391850 | 10469886650             | in gene, in gene        | 5.00     |
| 1448656_at   | NM_001044741,<br>NM_007581                                                 | Cacnb3        | calcium channel, voltage-dependent, beta 3 subunit                                     | -1.75       | 15  | 98462651   | 98474961  | 229813829               | in gene,<br>downstream  | 5.50     |
| 1451323_at   | NM_145916                                                                  | Zfp7          | zinc finger protein 7                                                                  | -1.76       | 15  | 76709689   | 76722825  | 20615                   | downstream              | 7.00     |
| 1434007_at   | NM_172670                                                                  | Gylt1b        | glycosyltransferase-like 1B                                                            | -1.78       | 2   | 92205209   | 92211168  | -9552                   | upstream                | 5.00     |
| 1449019_at   | NM_001042541,<br>NM_009648                                                 | Akap1         | A kinase (PRKA) anchor protein 1                                                       | -1.78       | 11  | 86692106   | 88725900  | 76                      | in gene                 | 7.00     |
| 1450992_a_at | NM_010789                                                                  | Meis1         | Meis homeobox 1                                                                        | -1.78       | 11  | 18780431   | 18918683  | 482591877               | in gene, upstream       | 8.00     |
| 1421424_a_at | NM_008486                                                                  | Anpep         | alanine (membrane) aminopeptidase                                                      | -1.79       | 7   | 86966689   | 86987170  | 49305854                | in gene, upstream       | 6.50     |
| 1434158_at   | NM_146041                                                                  | Gm5s          | GDP-mannose 4, 6-dehydratase                                                           | -1.79       | 13  | 31911455   | 32430413  | 69357                   | in gene                 | 6.00     |
| 1452244_at   | NM_027519                                                                  | 6330406115Rik | RIKEN cDNA 6330406115 gene                                                             | -1.80       | 5   | 150214381  | 150234278 | 16675                   | in gene                 | 5.00     |
| 1429029_at   | NM_028943                                                                  | Sgms2         | sphingomyelin synthase 2                                                               | -1.80       | 3   | 131025656  | 131047853 | 24157                   | downstream              | 5.00     |
| 1424175_at   | NM_017376,<br>NM_153484                                                    | Tef           | thyrotroph embryonic factor                                                            | -1.80       | 15  | 81633247   | 81657293  | 8673                    | in gene                 | 8.00     |
| 1444615_x_at | NM_009822                                                                  | Runx1t1       | runx-related transcription factor 1; translocated to, 1 (cyclin D-related)             | -1.81       | 4   | 13711929   | 13818264  | 48295                   | in gene                 | 6.00     |
| 1456133_x_at | NM_010580                                                                  | Itgb5         | integrin beta 5                                                                        | -1.82       | 16  | 33829845   | 33949232  | -7205                   | upstream                | 6.00     |
| 1429206_at   | NM_001081347                                                               | Rhbpb1        | Rho-related BTB domain containing 1                                                    | -1.83       | 10  | 68675405   | 68754539  | 65971                   | in gene                 | 7.00     |
| 1418472_at   | NM_023113                                                                  | Aspa          | aspartoacylase                                                                         | -1.84       | 11  | 73118490   | 73138136  | 22680                   | downstream              | 5.00     |
| 1454733_at   | NM_172729                                                                  | Nod1          | nucleotide-binding oligomerization domain containing 1                                 | -1.88       | 6   | 54873943   | 54922405  | -59                     | upstream                | 7.00     |
| 1424127_at   | NM_010165                                                                  | Eya2          | eyes absent 2 homolog (Drosophila)                                                     | -1.89       | 2   | 165480798  | 165597131 | -414                    | upstream                | 7.00     |
| 1417533_a_at | NM_010580                                                                  | Itgb5         | integrin beta 5                                                                        | -1.89       | 16  | 33829845   | 33949232  | -7205                   | upstream                | 6.00     |
| 1438411_at   | NM_175520                                                                  | Gpr81         | G protein-coupled receptor 81                                                          | -1.89       | 5   | 124326987  | 124330012 | -8612                   | upstream                | 5.00     |
| 1417534_at   | NM_010580                                                                  | Itgb5         | integrin beta 5                                                                        | -1.90       | 16  | 33829845   | 33949232  | -7205                   | upstream                | 6.00     |
| 1439764_s_at | NM_183029                                                                  | Igf2bp2       | insulin-like growth factor 2 mRNA binding protein 2                                    | -1.91       | 16  | 22059128   | 22163092  | 40788                   | in gene                 | 4.00     |
| 1425248_a_at | NM_019392                                                                  | Tyro3         | TYRO3 protein tyrosine kinase 3                                                        | -1.92       | 2   | 119625250  | 119643840 | 19182                   | downstream              | 6.00     |
| 1429891_at   | NM_029341                                                                  | Capsl         | calyphosine-like                                                                       | -1.95       | 15  | 9365783    | 9395790   | 30841                   | downstream              | 6.00     |
| 1428811_at   | NM_181819                                                                  | Wfikkn2       | WAP, follistatin/kazal, immunoglobulin, kunitz and netrin domain containing 2          | -1.95       | 11  | 94098912   | 94103863  | 6135361                 | downstream,<br>upstream | 8.50     |
| 1427640_a_at | NM_009822                                                                  | Runx1t1       | runx-related transcription factor 1; translocated to, 1 (cyclin D-related)             | -1.95       | 4   | 13711929   | 13818264  | 48295                   | in gene                 | 6.00     |
| 1439527_at   | NM_008829                                                                  | Pgr           | progesterone receptor                                                                  | -1.96       | 9   | 8899833    | 8968611   | 70567                   | downstream              | 8.00     |
| 1452213_at   | NM_198292                                                                  | Tex2          | testis expressed gene 2                                                                | -1.96       | 11  | 106363453  | 106474244 | 111908                  | downstream              | 7.00     |
| 1427673_a_at | NM_011348                                                                  | Sema3e        | sema domain, immunoglobulin domain (lg), short basic domain, secreted, (semaphorin) 3E | -1.97       | 5   | 14025276   | 14256689  | 148676                  | in gene                 | 6.00     |
| 1418186_at   | NM_008185                                                                  | Gstt1         | glutathione S-transferase, theta 1                                                     | -1.97       | 10  | 75246560   | 75261329  | 24961                   | downstream              | 6.00     |
| 1420484_a_at | NM_011707                                                                  | Vtn           | vitronectin                                                                            | -1.99       | 11  | 78312788   | 78315826  | 1548                    | in gene                 | 4.00     |
| 1419647_a_at | NM_133662                                                                  | Ier3          | immediate early response 3                                                             | -2.01       | 17  | 35958658   | 35959856  | 3341726                 | in gene,<br>downstream  | 6.00     |
| 1449315_at   | NM_011857                                                                  | Odz3          | odd Oz/ten-m homolog 3 (Drosophila)                                                    | -2.01       | 8   | 49313038   | 49760044  | 431436                  | in gene                 | 6.00     |
| 1451453_at   | NM_010019                                                                  | Dapk2         | death-associated protein kinase 2                                                      | -2.02       | 9   | 66006072   | 66120049  | -88                     | upstream                | 6.00     |
| 1453587_at   | NM_027819                                                                  | Gtg6          | gamma-glutamyltransferase 6                                                            | -2.03       | 11  | 72249028   | 72251909  | 5788                    | downstream              | 7.00     |
| 1436584_at   | NM_011897                                                                  | Spry2         | sprouty homolog 2 (Drosophila)                                                         | -2.05       | 14  | 106291732  | 106296036 | -604                    | upstream                | 6.00     |
| 1421444_at   | NM_008829                                                                  | Pgr           | progesterone receptor                                                                  | -2.06       | 9   | 8899833    | 8968611   | 70567                   | downstream              | 8.00     |
| 1429178_at   | NM_011857                                                                  | Odz3          | odd Oz/ten-m homolog 3 (Drosophila)                                                    | -2.08       | 8   | 49313038   | 49760044  | 431436                  | in gene                 | 6.00     |
| 1454048_a_at | NM_027627                                                                  | 4931408A02Rik | RIKEN cDNA 4931408A02 gene                                                             | -2.08       | 16  | 90831358   | 90904940  | 51682                   | in gene                 | 9.00     |
| 1448263_a_at | NM_023149                                                                  | Cndp2         | CNDP dipeptidase 2 (metallopeptidase M20 family)                                       | -2.09       | 18  | 84836861   | 84855025  | -175                    | upstream                | 4.00     |
| 1456130_at   | XM_287555,<br>XM_983072                                                    | Thsd7a        | thrombospondin, type I, domain containing 7A                                           | -2.10       | 6   | 12265952   | 12699188  | 146788                  | in gene                 | 6.00     |
| 1430355_a_at | NM_133186                                                                  | Steap3        | STEAP family member 3                                                                  | -2.10       | 1   | 122123783  | 122161834 | 3322616778              | in gene, in gene        | 7.00     |
| 1419564_at   | NM_020589                                                                  | Zfp467        | zinc finger protein 467                                                                | -2.11       | 6   | 48387585   | 48395606  | 1590                    | in gene                 | 5.00     |
| 1441572_at   | NM_007831                                                                  | Dcc           | deleted in colorectal carcinoma                                                        | -2.11       | 18  | 71413286   | 72510723  | 1052915                 | in gene                 | 5.00     |
| 1447901_x_at | NM_030207                                                                  | Sfi1          | Sfi1 homolog, spindle assembly associated (yeast)                                      | -2.14       | 11  | 3031853    | 3093466   | 69626                   | downstream              | 13.00    |
| 1460177_at   | NM_023149                                                                  | Cndp2         | CNDP dipeptidase 2 (metallopeptidase M20 family)                                       | -2.15       | 18  | 84836861   | 84855025  | -175                    | upstream                | 4.00     |
| 1456195_x_at | NM_010580                                                                  | Itgb5         | integrin beta 5                                                                        | -2.15       | 16  | 33829845   | 33949232  | -7205                   | upstream                | 6.00     |
| 1460242_at   | NM_010016                                                                  | Cd55          | CD55 antigen                                                                           | -2.16       | 1   | 132335606  | 132359317 | 28341                   | downstream              | 5.00     |
| 1434606_at   | NM_010153                                                                  | ErbB3         | v-erb-b2 erythroblastic leukemia viral oncogene homolog 3 (avian)                      | -2.17       | 10  | 128006424  | 128026557 | 23181                   | downstream              | 7.00     |
| 1448321_at   | NM_022316                                                                  | Smoc1         | SPARC related modular calcium binding 1                                                | -2.18       | 12  | 82127818   | 82287387  | 110694                  | in gene                 | 6.00     |
| 1435667_at   | NM_001012623,<br>NM_001012624,<br>NM_001012625,<br>NM_053270,<br>NM_183018 | Rims1         | regulating synaptic membrane exocytosis 1                                              | -2.18       | 1   | 22278503   | 22422924  | 147180                  | downstream              | 5.00     |
| 1426787_at   | NM_030207                                                                  | Sfi1          | Sfi1 homolog, spindle assembly associated (yeast)                                      | -2.21       | 11  | 3031853    | 3093466   | 69626                   | downstream              | 13.00    |
| 1434881_s_at | NM_177715                                                                  | Kctd12        | potassium channel tetramerisation domain containing 12                                 | -2.22       | 14  | 103375798  | 103381854 | 30                      | in gene                 | 8.00     |
| 1421761_a_at | NM_013800                                                                  | Barx2         | BarH-like homeobox 2                                                                   | -2.24       | 9   | 31653865   | 31720658  | 63618                   | in gene                 | 6.00     |
| 1417602_at   | NM_011066                                                                  | Per2          | period homolog 2 (Drosophila)                                                          | -2.27       | 1   | 93312559   | 93355873  | -1183                   | upstream                | 6.00     |
| 1434581_at   | NM_026629                                                                  | 2410066E13Rik | RIKEN cDNA 2410066E13 gene                                                             | -2.27       | 6   | 54631766   | 54650400  | 23738                   | downstream              | 7.00     |
| 1441727_s_at | NM_020589                                                                  | Zfp467        | zinc finger protein 467                                                                | -2.28       | 6   | 48387585   | 48395606  | 1590                    | in gene                 | 5.00     |
| 1438305_at   | NM_001012623,<br>NM_001012624,<br>NM_001012625,<br>NM_053270,<br>NM_183018 | Rims1         | regulating synaptic membrane exocytosis 1                                              | -2.29       | 1   | 22278503   | 22422924  | 147180                  | downstream              | 5.00     |
| 1443906_at   | NM_010016                                                                  | Cd55          | CD55 antigen                                                                           | -2.43       | 1   | 132335606  | 132359317 | 28341                   | downstream              | 5.00     |
| 1455772_at   | NM_008829                                                                  | Pgr           | progesterone receptor                                                                  | -2.44       | 9   | 8899833    | 8968611   | 70567                   | downstream              | 8.00     |
| 1428663_at   | NM_028943                                                                  | Sgms2         | sphingomyelin synthase 2                                                               | -2.45       | 3   | 131025656  | 131047853 | 24157                   | downstream              | 5.00     |
| 1444740_at   | XM_620510,<br>XM_907730                                                    | Lass3         | LAG1 homolog, ceramide synthase 3                                                      | -2.46       | 7   | 73888390   | 73966728  | 14602                   | in gene                 | 5.00     |
| 1429918_at   | NM_175535                                                                  | Arhgap20      | Rho GTPase activating protein 20                                                       | -2.48       | 9   | 51573457   | 51661164  | 7343                    | in gene                 | 4.00     |
| 1440487_at   | NM_007831                                                                  | Dcc           | deleted in colorectal carcinoma                                                        | -2.59       | 18  | 71413286   | 72510723  | 1052915                 | in gene                 | 5.00     |

| Probe Set    | Accession No. | Symbol     | Gene Title                                                                                                   | Fold Change | Chr | Gene Start | Gene End  | Interval Dists to Start | Interval Pos     | Avg Peak |
|--------------|---------------|------------|--------------------------------------------------------------------------------------------------------------|-------------|-----|------------|-----------|-------------------------|------------------|----------|
| 1434210_s_at | NM_008377     | Lrig1      | leucine-rich repeats and immunoglobulin-like domains 1                                                       | -2.60       | 6   | 94554523   | 94650139  | 72179                   | in gene          | 5.00     |
| 1419420_at   | NM_012028     | St6galnac5 | ST6 (alpha-N-acetyl-neuraminy-2,3-beta-galactosyl-1,3)-N-acetylgalactosaminide alpha-2,6-sialyltransferase 5 | -2.62       | 3   | 152482850  | 152645174 | 169350                  | downstream       | 7.00     |
| 1452358_at   | NM_198409     | Rai2       | retinoic acid induced 2                                                                                      | -2.66       | 0   | 158155559  | 158217425 | 29465                   | in gene          | 6.00     |
| 1449893_a_at | NM_008377     | Lrig1      | leucine-rich repeats and immunoglobulin-like domains 1                                                       | -2.71       | 6   | 94554523   | 94650139  | 72179                   | in gene          | 5.00     |
| 1423468_at   | NM_133186     | Steap3     | STEAP family member 3                                                                                        | -2.72       | 1   | 122123783  | 122161834 | 3322616778              | in gene, in gene | 7.00     |
| 1418762_at   | NM_010016     | Cd55       | CD55 antigen                                                                                                 | -2.77       | 1   | 132335606  | 132359317 | 28341                   | downstream       | 5.00     |
| 1424902_at   | NM_028199     | Plxdc1     | plexin domain containing 1                                                                                   | -2.95       | 11  | 97784552   | 97847694  | -8178                   | upstream         | 5.00     |
| 1442226_at   | NM_011348     | Sema3e     | sema domain, immunoglobulin domain (Ig), short basic domain, secreted, (semaphorin) 3E                       | -3.06       | 5   | 14025276   | 14256689  | 148676                  | in gene          | 6.00     |
| 1419717_at   | NM_011348     | Sema3e     | sema domain, immunoglobulin domain (Ig), short basic domain, secreted, (semaphorin) 3E                       | -3.31       | 5   | 14025276   | 14256689  | 148676                  | in gene          | 6.00     |
| 1418207_at   | NM_033648     | Fxyd4      | FXD domain-containing ion transport regulator 4                                                              | -4.18       | 6   | 117883577  | 117887353 | -1975                   | upstream         | 6.00     |
